# Supplementary material for: Proteomic, Biochemical, and Morphological Analyses of the Effect of Silver Nanoparticles Mixed with Organic and Inorganic Chemicals on Wheat Growth
Source: Cells. 2022 May 7;11(9):1579. doi: 10.3390/cells11091579 (PMC9104970; doi:10.3390/cells11091579)
Supplement: Supplementary file 1 [file cells-11-01579-s001.zip]

Archive with 4 entries (4 files):
- new Suplemental Table S2.xlsx
- rev Suplemental Table S1.pdf
- rev2 Suplemental Table S3.pdf
- rev2 Supplemental Figures.pdf
