# Supplementary material for: Proteomic, Biochemical, and Morphological Analyses of the Effect of Silver Nanoparticles Mixed with Organic and Inorganic Chemicals on Wheat Growth
Source: Cells. 2022 May 7;11(9):1579. doi: 10.3390/cells11091579 (PMC9104970; doi:10.3390/cells11091579)
Supplement: Supplementary file 1 [file cells-11-01579-s001.zip › new Suplemental Table S2.xlsx]

## Sheet: Sheet1
Table S2. List of identified proteins in wheat roots treated with the mixture of AgNPs/nicotinate/KNO3 and roots of untreated wheat.
Protein FDR Confidence: Combined	Master	Accession	Description	Exp. q-value: Combined	Sum PEP Score	Coverage [%]	# Peptides	# PSMs	# Unique Peptides	# Protein Groups	# AAs	MW [kDa]	calc. pI	Score Mascot: A5 Mascot	Score Mascot: B5 Mascot	Score Sequest HT: A2 Sequest HT	Score Sequest HT: B2 Sequest HT	# Peptides (by Search Engine): A2 Sequest HT	# Peptides (by Search Engine): A5 Mascot	# Peptides (by Search Engine): B2 Sequest HT	# Peptides (by Search Engine): B5 Mascot	Biological Process	Cellular Component	Molecular Function	Pfam IDs	Entrez Gene ID	Ensembl Gene ID	Gene Symbol	Chromosome	# Razor Peptides	Abundance Ratio: (N) / (C)	Abundance Ratio (log2): (N) / (C)	Abundance Ratio P-Value: (N) / (C)	Abundance Ratio Adj. P-Value: (N) / (C)	Abundance Ratio Variability [%]: (N) / (C)	Abundance Ratio Weight: (N) / (C)	Abundances (Grouped): C	Abundances (Grouped): N	Abundances (Grouped) CV [%]: C	Abundances (Grouped) CV [%]: N	Abundances (Grouped) Count: C	Abundances (Grouped) Count: N	Abundances (by Bio. Rep.): C,w1	Abundances (by Bio. Rep.): C,w2	Abundances (by Bio. Rep.): C,w3	Abundances (by Bio. Rep.): N,w4	Abundances (by Bio. Rep.): N,w5	Abundances (by Bio. Rep.): N,w6	Abundances (by Bio. Rep.) CV [%]: C,w1
High	Master Protein	A0A1D5UEF9	Uncharacterized protein [OS=Triticum aestivum]	0	419.805	59	67	982	4	1	1607	174.2	6.67	2431	3455	657.61	836.09	62	63	65	65	metabolic process		catalytic activity	Pf00310, Pf01070, Pf01493, Pf01645, Pf04898		TRIAE_CS42_2BS_TGACv1_147968_AA0489420			70	1.488	0.57	0.0279704	0.365444	30.61	29.3521	83.5	116.5	14.01	5.95	3	3	67.9	85.4	89.1	126.3	119.2	112.1
High	Master Protein	A0A1D5UWH3	Uncharacterized protein [OS=Triticum aestivum]	0	417.813	59	66	971	3	1	1609	174.5	6.74	2406	3428	641.38	829.02	61	62	64	64	metabolic process		catalytic activity	Pf00310, Pf01070, Pf01493, Pf01645, Pf04898		TRIAE_CS42_2DS_TGACv1_177417_AA0576530			0	1.409	0.49	0.0676666	0.562869	26.27	23.0393	83.3	116.7	3.28	10.43	3	3	79.2	83.6	84	117.1	130.3	105.8
High	Master Protein	A0A1D6S220	Uncharacterized protein [OS=Triticum aestivum]	0	396.971	72	46	1944	5	1	807	89.2	6.4	6401	6441	1636.63	1573.15	45	45	43	42	metabolic process		catalytic activity;metal ion binding	Pf01717, Pf08267		TRIAE_CS42_5AS_TGACv1_393328_AA1271350			49	0.923	-0.12	0.758975	0.98358	24.14	30.9376	102.5	97.5	6.65	1.82	3	3	99.6	101.3	112.4	96.4	96.8	93.6
High	Master Protein	B2ZGL4	Plastid acetyl-CoA carboxylase [OS=Triticum aestivum]	0	392.036	54	84	862	3	1	2311	254.8	6.16	2496	2091	674.73	618.85	80	83	73	71	metabolic process		catalytic activity;metal ion binding;nucleotide binding	Pf00289, Pf00364, Pf01039, Pf02655, Pf02785, Pf02786, Pf08326, Pf13535, Pf15632					82	0.856	-0.22	0.484823	0.957414	22.66	27.5839	108.4	91.6	17.41	14.04	3	3	102	90.5	126.8	86.3	85.7	108.7
High	Master Protein	B2ZGL3	Plastid acetyl-CoA carboxylase [OS=Triticum aestivum]	0	382.351	52	81	836	1	1	2311	254.9	6.13	2377	2025	654.85	597.44	77	80	70	68	metabolic process		catalytic activity;metal ion binding;nucleotide binding	Pf00289, Pf00364, Pf01039, Pf02655, Pf02785, Pf02786, Pf08326, Pf13535, Pf15632					1	0.496	-1.01	0.0149625	0.236619	13.5	20.2805	134.5	65.5	6.69	20.15	3	3	141.4	124.6	138.5	51.1	77	67.4
High	Master Protein	B2ZGL2	Plastid acetyl-CoA carboxylase [OS=Triticum aestivum]	0	377.913	51	80	814	3	1	2311	254.8	6.15	2397	1897	635.67	577.19	75	78	68	67	metabolic process		catalytic activity;metal ion binding;nucleotide binding	Pf00289, Pf00364, Pf01039, Pf02655, Pf02785, Pf02786, Pf08326, Pf13535, Pf15632					0	0.994	-0.01	0.712889	0.983028	33.88	20.4097	127.5	72.5	27.49	14.54	3	3	166.7	131.4	94.7	74.8	57.5	75
High	Master Protein	A0A1D6S488	Uncharacterized protein [OS=Triticum aestivum]	0	373.814	76	46	1867	7	1	772	85.4	6.21	6003	5768	1547.68	1488.7	45	45	42	41	metabolic process		catalytic activity;metal ion binding	Pf01717, Pf08267		TRIAE_CS42_5BS_TGACv1_423584_AA1379990			0	0.822	-0.28	0.405226	0.943753	21.61	25.7181	112.1	87.9	11.75	2.97	3	3	95.4	119.4	115.9	86.7	91.7	90.9
High	Master Protein	A0A077S2R7	glycine cleavage system P protein [OS=Triticum aestivum]	0	369.334	77	49	1092	7	1	1031	111	6.9	1996	2667	703.05	929.31	42	42	47	48	metabolic process	mitochondrion	catalytic activity	Pf02347					54	1.683	0.75	0.0044724	0.0999314	35.18	29.6298	80.8	119.2	11.93	11.02	3	3	68.8	80.3	87.4	135.6	118.5	109.3
High	Master Protein	A0A1D5XVG2	Uncharacterized protein [OS=Triticum aestivum]	0	350.737	72	40	1421	1	1	766	84.3	6.37	4566	4215	1173.03	1107.74	38	37	38	36	metabolic process		catalytic activity;metal ion binding	Pf01717, Pf08267		TRIAE_CS42_4BS_TGACv1_330819_AA1108930			1	1.181	0.24	0.296101	0.922441	48.31	23.1029	98.6	101.4	40.21	26.57	3	3	51	97.7	122.6	86.1	142.2	100.5
High	Master Protein	A0A1D5X5X3	Uncharacterized protein [OS=Triticum aestivum]	0	343.641	67	40	1425	2	1	828	91.5	7.01	4438	4209	1167.96	1106.42	39	38	38	36	metabolic process		catalytic activity;metal ion binding	Pf01717, Pf08267		TRIAE_CS42_4AL_TGACv1_290117_AA0981910			21	0.912	-0.13	0.7135	0.983028	25.79	27.8626	96.1	103.9	18.8	6.26	3	3	90.7	92.3	124.9	99.8	90.4	101.8
High	Master Protein	A0A1D5Y8L3	Uncharacterized protein [OS=Triticum aestivum]	0	342.125	64	39	1417	1	1	849	93.9	6.84	4571	4188	1170.36	1103.32	38	37	38	36	metabolic process		catalytic activity;metal ion binding	Pf01717, Pf08267		TRIAE_CS42_4DS_TGACv1_361983_AA1175310			0	0.828	-0.27	0.716044	0.983028	16.29	20.6721	113	87	21	18.09	3	3	132.5	108.2	86.7	79.6	109.7	83.3
High	Master Protein	A0A1D5WPC9	glycine cleavage system P protein [OS=Triticum aestivum]	0	339.538	81	47	1023	5	1	921	99.5	6.43	1891	2600	650.83	888.03	40	40	45	46	metabolic process	mitochondrion	catalytic activity	Pf02347		TRIAE_CS42_3DL_TGACv1_252990_AA0892870			0	1.618	0.69	0.00616019	0.126589	49.62	23.9313	71.4	128.6	21.8	8.74	3	3	68.6	65	95.5	123.5	134.5	112.9
High	Master Protein	W5DSM4	Uncharacterized protein [OS=Triticum aestivum]	0	330.076	73	31	1184	22	1	464	50.9	7.3	4166	4654	975.71	1115.62	29	28	30	31			nucleotide binding	Pf00004, Pf06309		TRIAE_CS42_4AL_TGACv1_290053_AA0980930			18	1.471	0.56	0.0325684	0.400547	31.52	31.223	86.6	113.4	10.1	3.27	3	3	75.2	91	88.8	116.4	110.8	117.9
High	Master Protein	P20858	ATP synthase subunit beta, chloroplastic [OS=Triticum aestivum]	0	317.054	89	36	1444	33	1	498	53.8	5.16	4258	5259	1098.72	1347.73	34	35	35	36	metabolic process;transport	membrane	catalytic activity;nucleotide binding;transporter activity	Pf00006, Pf00306, Pf02874	803128		atpB		3	1.3	0.38	0.1367	0.764761	30.75	31.4046	88.4	111.6	9	10.16	3	3	83.5	99.1	87.5	120.9	110.3	98.6
High	Master Protein	A0A1D5TJR6	Uncharacterized protein [OS=Triticum aestivum]	0	310.6	76	40	1637	2	1	578	61.3	5.2	5338	6447	1309.61	1529.99	38	38	40	39	metabolic process	cytoplasm	nucleotide binding	Pf00118		TRIAE_CS42_2AS_TGACv1_112371_AA0336650			44	1.081	0.11	0.602632	0.970619	35.7	31.2978	98.5	101.5	15.33	4.66	3	3	98.9	112.7	82.6	102	106.6	97.1
High	Master Protein	A0A1D5UV66	Uncharacterized protein [OS=Triticum aestivum]	0	298.669	76	40	1607	2	1	578	61.3	5.2	5382	6433	1274.67	1492.27	37	37	40	39	metabolic process	cytoplasm	nucleotide binding	Pf00118		TRIAE_CS42_2DS_TGACv1_177232_AA0569660			0	1.023	0.03	0.814252	0.985276	33.15	26.3508	101.3	98.7	12.92	4.88	3	3	118.6	100.4	92.4	99.9	97.8	90.9
High	Master Protein	Q0Q0I7	heat shock protein 90 [OS=Triticum aestivum]	0	294.205	61	41	707	2	1	700	80.4	5.03	2520	2042	630.66	530.61	38	39	36	36	metabolic process;response to stimulus		nucleotide binding;protein binding	Pf00183, Pf02518, Pf13589		TRIAE_CS42_5BL_TGACv1_408217_AA1362310; TRIAE_CS42_5DL_TGACv1_434138_AA1430290			0	1.178	0.24	0.253239	0.889326	45.45	24.8499	89.5	110.5	35.98	9.66	3	3	82	70.8	135.5	101.3	95.5	115
High	Master Protein	F4Y595	heat shock protein 90 [OS=Triticum aestivum]	0	294.199	61	41	692	2	1	700	80.4	5.03	2535	2140	616.5	518.47	38	39	35	35	metabolic process;response to stimulus		nucleotide binding;protein binding	Pf00183, Pf02518, Pf13589					49	0.838	-0.26	0.414684	0.943753	27.37	29.5523	109.2	90.8	8.37	10.08	3	3	118	99.8	108.9	82.3	90.5	100.6
High	Master Protein	A0A1D5WXT4	Uncharacterized protein [OS=Triticum aestivum]	0	278.596	63	43	2333	3	1	690	73.8	8.21	8496	8698	1947.74	2133.7	40	40	43	42	metabolic process	cytoplasm	nucleotide binding	Pf00118		TRIAE_CS42_4AL_TGACv1_288215_AA0940570			46	1.122	0.17	0.474045	0.957414	32.12	31.4338	94.7	105.3	9.94	2.42	3	3	87.5	106	93.1	102.6	107.4	103.5
High	Master Protein	A0A1D6D1G2	Uncharacterized protein [OS=Triticum aestivum]	0	278.335	70	43	2322	3	1	622	66.6	5.68	8379	8591	1935.87	2125.29	40	40	43	42	metabolic process	cytoplasm	nucleotide binding	Pf00118		TRIAE_CS42_7DS_TGACv1_622664_AA2043510			0	1.185	0.24	0.315722	0.930938	21.48	28.017	92.1	107.9	16.16	1.72	3	3	75.8	105.2	93.1	110.3	109.1	106.6
High	Master Protein	A0A1D5ZYH0	Uncharacterized protein [OS=Triticum aestivum]	0	274.135	64	43	673	2	1	781	88.3	5.02	1854	1979	522.12	557.9	40	39	41	41	metabolic process;response to stimulus		nucleotide binding;protein binding	Pf00183, Pf02518, Pf13589		TRIAE_CS42_5DL_TGACv1_436591_AA1462140			49	1.081	0.11	0.601268	0.970428	28.66	28.8953	99.3	100.7	5.81	5.48	3	3	91.5	98.8	102.7	100.2	98.1	108.7
High	Master Protein	A0A1D5Z2E1	Uncharacterized protein [OS=Triticum aestivum]	0	272.955	63	42	671	1	1	795	89.8	5	1854	1974	521.84	555.27	39	38	41	41	metabolic process;response to stimulus		nucleotide binding;protein binding	Pf00183, Pf02518, Pf13589		TRIAE_CS42_5BL_TGACv1_404848_AA1312760			0	0.524	-0.93	0.112431	0.715543	3.49	18.7521	130.5	69.5	11.77	14.6	2	3	153.4	181.2		88.8	101.2	75.4
High	Master Protein	A0A1D6SC42	Uncharacterized protein [OS=Triticum aestivum]	0	270.24	76	40	652	1	1	676	74.1	5.4	1887	1783	504.1	498.13	39	39	40	39	metabolic process;transport		catalytic activity;nucleotide binding;transporter activity	Pf00006, Pf00306, Pf02874		TRIAE_CS42_7AL_TGACv1_558294_AA1792080			0	0.957	-0.06	0.912947	0.991839	10.56	23.2392	100.8	99.2	12.48	7.23	3	3	118	97.5	94.3	96	90.2	104.1
High	Master Protein	P11383	Ribulose bisphosphate carboxylase large chain [OS=Triticum aestivum]	0	270.162	60	31	3620	16	1	477	52.8	6.68	10652	14606	2336.26	3004.26	29	29	31	31	metabolic process		catalytic activity;metal ion binding	Pf00016, Pf02788	803091; 100049018		rbcL		15	1.253	0.33	0.195492	0.837831	40.83	33.7383	94	106	5.65	3.68	3	3	87.6	93.1	98	104.8	104.9	111.7
High	Master Protein	A0A1D6SDU1	Uncharacterized protein [OS=Triticum aestivum]	0	269.325	76	40	652	1	1	678	74.3	5.4	1861	1728	503.36	498.64	39	39	40	39	metabolic process;transport		catalytic activity;nucleotide binding;transporter activity	Pf00006, Pf00306, Pf02874		TRIAE_CS42_7BL_TGACv1_579063_AA1903600; TRIAE_CS42_7BL_TGACv1_579860_AA1910590			50	1.013	0.02	0.857287	0.986776	27.36	28.3564	101.6	98.4	3.16	3.91	3	3	104.6	98.3	100.6	103.2	95.9	97.4
High	Master Protein	A0A1D5YKH5	Uncharacterized protein [OS=Triticum aestivum]	0	267.949	62	41	663	2	1	781	88.3	4.98	1930	1968	516.97	547	38	37	40	40	metabolic process;response to stimulus		nucleotide binding;protein binding	Pf00183, Pf02518, Pf13589		TRIAE_CS42_5AL_TGACv1_375889_AA1228510			0	1.043	0.06	0.539678	0.960041	23.91	22.3819	92.6	107.4	14.11	17.63	3	3	90.3	92.7	115.7	107.5	80.3	113.5
High	Master Protein	A0A1D5YQY9	Clathrin heavy chain [OS=Triticum aestivum]	0	267.462	51	52	548	12	1	1708	193.4	5.36	1640	1193	437.21	381.37	50	50	44	44	cell organization and biogenesis;transport	membrane	protein binding;structural molecule activity	Pf00637, Pf01394, Pf09268, Pf13838		TRIAE_CS42_5AL_TGACv1_378411_AA1253160			40	0.719	-0.48	0.106491	0.699174	23.35	26.5163	122	78	26.78	30.57	3	3	110.1	89.6	151.1	66.6	70.3	112.4
High	Master Protein	A0A1D5RP45	ATP synthase subunit beta [OS=Triticum aestivum]	0	261.915	65	31	703	5	1	613	65.7	7.4	1919	2092	565.32	554.98	29	30	30	30	metabolic process;transport		catalytic activity;nucleotide binding;transporter activity	Pf00006, Pf00306, Pf02874		TRIAE_CS42_1AL_TGACv1_000051_AA0001340			26	1.078	0.11	0.611796	0.975074	26.66	29.2908	95.8	104.2	1.94	12.15	3	3	95.3	93.5	97.2	117.8	103.7	92.4
High	Master Protein	A0A1D5X6M9	Uncharacterized protein [OS=Triticum aestivum]	0	258.522	58	44	733	2	1	843	93.9	6.16	1785	1576	580.83	547.54	41	43	42	43			catalytic activity;nucleotide binding	Pf00009, Pf00679, Pf03764, Pf14492		TRIAE_CS42_4AL_TGACv1_290422_AA0985250			48	0.954	-0.07	0.895156	0.990309	37.02	29.0984	102.6	97.4	13.97	13.15	3	3	100.5	91	119.5	84.1	95.5	109.4
High	Master Protein	W5G4K3	Lipoxygenase [OS=Triticum aestivum]	0	256.801	56	39	610	2	1	928	105.3	6.1	1649	1317	435.97	366.55	38	37	36	35	metabolic process		catalytic activity;metal ion binding;protein binding	Pf00305, Pf01477		TRIAE_CS42_5DS_TGACv1_457428_AA1486420			0	0.651	-0.62	0.0619205	0.536635	14.36	23.9897	122.6	77.4	14.19	4.04	3	3	139.9	123.3	105.1	73.9	80	77.8
High	Master Protein	A0A1D6D2L5	Uncharacterized protein [OS=Triticum aestivum]	0	254.455	76	39	1158	1	1	745	80	6.29	2426	3045	859.05	1025.26	37	37	39	39	metabolic process		catalytic activity	Pf00456, Pf02779, Pf02780		TRIAE_CS42_7DS_TGACv1_623048_AA2049060			2	1.048	0.07	0.710551	0.983028	32.1	25.8405	104.4	95.6	18.32	10.76	3	3	116	104.5	80	91.9	112.1	95.6
High	Master Protein	A0A1D6BU60	Uncharacterized protein [OS=Triticum aestivum]	0	253.936	76	39	1138	3	1	747	80.1	6.29	2480	3145	846.48	1020.38	36	36	39	39	metabolic process		catalytic activity	Pf00456, Pf02779, Pf02780		TRIAE_CS42_7AS_TGACv1_569503_AA1817670			39	1.231	0.3	0.229335	0.884424	28.26	30.6358	91	109	8.24	7.34	3	3	83.1	98	90	118.5	107.7	102.8
High	Master Protein	A0A1D5ZVH4	Lipoxygenase [OS=Triticum aestivum]	0	252.165	65	38	578	6	1	864	96.5	6.65	1608	1304	488.39	423.06	36	37	34	34	metabolic process		catalytic activity;metal ion binding;protein binding	Pf00305, Pf01477		TRIAE_CS42_5DL_TGACv1_435337_AA1449230			37	0.631	-0.66	0.0214221	0.306591	10.95	27.9322	124.3	75.7	9.85	8.8	3	3	137.9	118.8	115.2	72.1	72.3	83.8
High	Master Protein	W5BBF4	Lipoxygenase [OS=Triticum aestivum]	0	252.099	52	38	657	16	1	927	101.8	6.35	2158	1899	509.52	473.55	37	37	35	36	metabolic process		catalytic activity;metal ion binding;protein binding	Pf00305, Pf01477		TRIAE_CS42_2BL_TGACv1_130067_AA0402730			4	0.679	-0.56	0.0551202	0.516953	18.51	28.3424	117.9	82.1	13.16	21.66	3	3	128.6	128.7	101.4	89.6	91.4	60.3
High	Master Protein	A0A1D5YTJ8	Lipoxygenase [OS=Triticum aestivum]	0	251.225	56	39	583	2	1	928	105.4	6.11	1550	1218	417.76	341.74	38	37	35	34	metabolic process		catalytic activity;metal ion binding;protein binding	Pf00305, Pf01477		TRIAE_CS42_5AS_TGACv1_393105_AA1268520			49	0.637	-0.65	0.0245237	0.335038	12.75	28.6961	122.4	77.6	3.91	4.18	3	3	125.3	116.5	124	81.1	78.6	74.6
High	Master Protein	A0A1D5Y3Q3	Uncharacterized protein [OS=Triticum aestivum]	0	251.219	68	45	572	3	1	818	90.8	5.26	1625	1441	410.47	401.5	40	41	41	40			catalytic activity;nucleotide binding	Pf00004, Pf00910, Pf01057, Pf01078, Pf02359, Pf02933, Pf05496, Pf06068, Pf07724, Pf07728, Pf13173, Pf13191, Pf13207, Pf13238, Pf13401		TRIAE_CS42_4DL_TGACv1_344906_AA1150440			44	0.889	-0.17	0.616059	0.977367	30.6	28.7122	111.3	88.7	5.79	8.04	3	3	114	101.9	111.2	85.1	88.7	99.2
High	Master Protein	W5BDM2	Uncharacterized protein [OS=Triticum aestivum]	0	250.606	68	31	740	3	1	647	71.1	5.19	2877	2784	626.51	573.87	28	28	29	30	cell organization and biogenesis		nucleotide binding	Pf00012, Pf06723		TRIAE_CS42_2BL_TGACv1_131039_AA0421600			0	0.786	-0.35	0.330883	0.940733	25.28	25.0642	103.5	96.5	11.28	13.45	3	3	121.6	98.1	104.4	77.8	97.4	100.7
High	Master Protein	A0A1D6C799	Uncharacterized protein [OS=Triticum aestivum]	0	250.204	59	43	718	3	1	843	93.8	6.16	1751	1492	562.79	529.99	39	42	41	42			catalytic activity;nucleotide binding	Pf00009, Pf00679, Pf03764, Pf14492		TRIAE_CS42_7BL_TGACv1_577915_AA1886030			2	0.865	-0.21	0.533096	0.960041	22.46	25.7734	111.1	88.9	6.3	15.63	3	3	114.2	106	100.8	84.4	84.8	109.8
High	Master Protein	Q1XIR9	4-hydroxy-7-methoxy-3-oxo-3,4-dihydro-2H-1,4-benzoxazin-2-yl glucoside beta-D-glucosidase 1a, chloroplastic [OS=Triticum aestivum]	0	248.305	72	37	1592	5	1	569	64.5	7.02	4590	2488	1622.51	1121.72	34	33	33	33	metabolic process		catalytic activity	Pf00150, Pf00232	780595		TaGlu1a		35	0.793	-0.33	0.269936	0.909889	16.3	30.776	113.6	86.4	6.45	4.86	3	3	103.3	114.9	116.5	84.7	93.1	87.5
High	Master Protein	A0A1D5T992	Elongation factor G, chloroplastic [OS=Triticum aestivum]	0	248.301	68	34	580	34	1	768	84.1	5.45	1432	1663	468.38	500.26	30	30	30	30	metabolic process		catalytic activity;nucleotide binding;RNA binding	Pf00009, Pf00679, Pf01926, Pf03144, Pf03764, Pf14492		TRIAE_CS42_2AL_TGACv1_093757_AA0286190			0	1.298	0.38	0.138496	0.766338	30.51	28.2379	90.2	109.8	12.04	3.31	3	3	75.4	91.4	95.1	116.9	110	111.2
High	Master Protein	A0A1D5Y9W8	Clathrin heavy chain [OS=Triticum aestivum]	0	245.342	46	48	479	8	1	1706	192.8	5.31	1369	1041	364.36	309.61	45	45	39	39	cell organization and biogenesis;transport	membrane	protein binding;structural molecule activity	Pf00637, Pf01394, Pf09268, Pf13838		TRIAE_CS42_4DS_TGACv1_362497_AA1180110			0	0.794	-0.33	0.528892	0.957705	26.47	22.7714	120.3	79.7	22.34	27.63	3	3	114.6	89.8	141.2	67.1	75.9	111.4
High	Master Protein	A0A1D5X6P8	Uncharacterized protein [OS=Triticum aestivum]	0	244.942	71	38	1149	1	1	791	85.7	6.8	2411	3037	849.24	1005.35	36	36	38	38	metabolic process		catalytic activity	Pf00456, Pf02779, Pf02780		TRIAE_CS42_4AL_TGACv1_290435_AA0985480			0
High	Master Protein	Q1XH05	4-hydroxy-7-methoxy-3-oxo-3,4-dihydro-2H-1,4-benzoxazin-2-yl glucoside beta-D-glucosidase 1b, chloroplastic [OS=Triticum aestivum]	0	244.521	75	33	1550	9	1	569	64.4	6.04	4235	2172	1574.74	1061.72	29	30	30	30	metabolic process		catalytic activity	Pf00150, Pf00232	780590	TRIAE_CS42_2BL_TGACv1_129397_AA0381780	Taglu1b		0	0.634	-0.66	0.0229347	0.322061	12.35	27.4792	126.5	73.5	5.04	15.21	3	3	124.3	127.3	115.5	69.5	91.2	72.2
High	Master Protein	A0A1D6RM17	Uncharacterized protein [OS=Triticum aestivum]	0	244.388	69	39	594	16	1	692	76.9	5.3	2170	2368	430.91	477.78	34	35	36	37			nucleotide binding;protein binding	Pf00004, Pf00910, Pf01695, Pf02151, Pf07724, Pf07728, Pf10431, Pf13177, Pf13191, Pf13401		TRIAE_CS42_2BL_TGACv1_132289_AA0436520			30	1.122	0.17	0.474546	0.957414	31.88	28.7146	99.4	100.6	12.05	4.28	3	3	99.5	107.8	84.7	107.7	100.8	99.5
High	Master Protein	A0A1D5UP29	Lipoxygenase [OS=Triticum aestivum]	0	242.933	52	38	647	9	1	927	101.8	6.43	2149	2086	524.75	475.27	37	37	36	37	metabolic process		catalytic activity;metal ion binding;protein binding	Pf00305, Pf01477		TRIAE_CS42_2DL_TGACv1_159609_AA0540570			32	0.677	-0.56	0.0539659	0.516953	17.24	30.0436	118.5	81.5	13.54	18.43	3	3	134.5	124.7	102.6	85.7	89.9	62.7
High	Master Protein	A0A1D5YF62	Uncharacterized protein [OS=Triticum aestivum]	0	241.824	69	32	650	1	1	648	71.2	5.21	3007	2401	578.94	524.7	29	29	29	31			nucleotide binding	Pf00012, Pf06723		TRIAE_CS42_5AL_TGACv1_374650_AA1205560			17	0.832	-0.27	0.394911	0.943753	22.07	26.9254	109.1	90.9	1.96	14.18	3	3	113.5	110.8	109.2	74.9	92.4	99.3
High	Master Protein	A0A1D6S9T4	Uncharacterized protein [OS=Triticum aestivum]	0	241.37	59	48	564	2	1	1086	121.1	5.64	1361	1324	433.3	475.69	46	46	46	46	metabolic process		catalytic activity;metal ion binding	Pf00675, Pf05193, Pf08367		TRIAE_CS42_6BL_TGACv1_503168_AA1627380			49	1.127	0.17	0.458382	0.957414	25.83	27.6398	94.5	105.5	4.63	7.45	3	3	92.7	99.3	91	114.4	99.1	103.5
High	Master Protein	A0A1D6A8T1	Uncharacterized protein [OS=Triticum aestivum]	0	240.515	58	47	555	1	1	1086	121.1	5.52	1350	1357	430.18	469.36	45	45	46	46	metabolic process		catalytic activity;metal ion binding	Pf00675, Pf05193, Pf08367		TRIAE_CS42_6AL_TGACv1_471960_AA1516300			0	1.049	0.07	0.450913	0.95364	23.17	21.012	97.6	102.4	22.74	8.81	3	2	95.2	148.9	114.7	128.1		113.1
High	Master Protein	A0A1D5YRV8	Uncharacterized protein [OS=Triticum aestivum]	0	238.607	68	32	699	5	1	647	71	5.19	2487	2454	587.21	530.78	29	29	30	31			nucleotide binding	Pf00012, Pf06723		TRIAE_CS42_5AS_TGACv1_392487_AA1259360			20	0.898	-0.16	0.652947	0.983028	25.75	28.1378	104.8	95.2	12.05	12.39	3	3	105.3	94.8	120.4	80.6	95.7	103.2
High	Master Protein	W5FCI5	Uncharacterized protein [OS=Triticum aestivum]	0	238.203	57	43	561	33	1	972	110.1	5.8	1328	1434	403.74	422.18	43	43	40	40	metabolic process		catalytic activity	Pf00311		TRIAE_CS42_5BL_TGACv1_407230_AA1354660			12	0.823	-0.28	0.363078	0.943753	20.43	27.8936	108.3	91.7	11.96	1.86	3	3	106.4	97.6	123.3	89.8	90	92.9
High	Master Protein	W5FEE5	Uncharacterized protein [OS=Triticum aestivum]	0	236.358	69	32	594	1	1	648	71.1	5.25	2348	1979	519.84	464.41	29	29	29	31	cell organization and biogenesis		nucleotide binding	Pf00012, Pf06723		TRIAE_CS42_5BL_TGACv1_404933_AA1315500			0	0.782	-0.35	0.497724	0.957414	17.42	22.7435	104.4	95.6	16.22	18.77	3	3	132.5	97.6	106.2	68.8	97.6	97.2
High	Master Protein	A0A1D6B7P8	aconitate hydratase [OS=Triticum aestivum]	0	235.75	54	35	613	4	1	975	106.1	6.81	1728	1725	481.68	464.43	35	34	34	34	metabolic process		catalytic activity;metal ion binding	Pf00330, Pf00694		TRIAE_CS42_6DL_TGACv1_527381_AA1703110			2	0.831	-0.27	0.504748	0.957414	16.58	25.0095	112.5	87.5	11.6	3.45	3	3	118.8	95.4	115.9	90.2	93	86.8
High	Master Protein	A0A1D6B8T0	Uncharacterized protein [OS=Triticum aestivum]	0	235.695	57	47	553	2	1	1087	121.1	5.64	1313	1438	419.6	467.86	45	45	45	45	metabolic process		catalytic activity;metal ion binding	Pf00675, Pf05193, Pf08367		TRIAE_CS42_6DL_TGACv1_527764_AA1708330			1	1.041	0.06	0.504676	0.957414	30.27	22.0716	94.4	105.6	26.9	4.7	3	3	89.2	129.4	78.9	105.9	99.8	96.6
High	Master Protein	C6K7G3	Lipoxygenase [OS=Triticum aestivum]	0	231.445	59	37	536	2	1	864	96.5	6.65	1498	1159	445.39	396.33	34	34	33	32	metabolic process		catalytic activity;metal ion binding;protein binding	Pf00305, Pf01477	100313966		Lox2		5	0.55	-0.86	0.00747744	0.146617	7.54	23.8848	128.2	71.8	7.44	6.29	3	3	137.9	119.4	125.1	77.8	69.7	70.1
High	Master Protein	A0A1D6A4M1	Uncharacterized protein [OS=Triticum aestivum]	0	228.203	67	36	756	2	1	690	73.5	5.11	2438	2331	635.36	623.59	34	34	35	35	metabolic process		nucleotide binding;protein binding	Pf00012, Pf06723		TRIAE_CS42_5DS_TGACv1_458250_AA1492940			0	1.075	0.1	0.458312	0.957414	29.69	24.3503	95.4	104.6	19.23	5.88	3	3	93.3	118	81.2	102.3	108.6	96.5
High	Master Protein	A0A1D5YW85	Uncharacterized protein [OS=Triticum aestivum]	0	228.097	67	36	750	2	1	690	73.5	5.12	2434	2320	636.18	617.72	34	34	35	35	metabolic process		nucleotide binding;protein binding	Pf00012, Pf06723		TRIAE_CS42_5AS_TGACv1_394841_AA1282020			37	1.172	0.23	0.345514	0.942528	27.73	29.4419	94.5	105.5	7.25	1.26	3	3	95.1	100.8	87.1	104.1	106.6	106.2
High	Master Protein	Q1XH04	4-hydroxy-7-methoxy-3-oxo-3,4-dihydro-2H-1,4-benzoxazin-2-yl glucoside beta-D-glucosidase 1c, chloroplastic [OS=Triticum aestivum]	0	227.537	63	33	1514	2	1	570	64.5	6.83	4257	2166	1549.47	1071.72	29	27	30	30	metabolic process		catalytic activity	Pf00150, Pf00232	780591	TRIAE_CS42_2DL_TGACv1_158758_AA0525550	Taglu1c		7	0.634	-0.66	0.0230948	0.323278	15.07	26.52	120.2	79.8	3.24	8.62	3	3	126.1	120.3	118.6	71	84.2	79.8
High	Master Protein	W5ASP5	Lipoxygenase [OS=Triticum aestivum]	0	227.362	52	35	626	13	1	927	101.4	6.28	1668	1565	488.13	458.56	34	33	33	34	metabolic process		catalytic activity;metal ion binding;protein binding	Pf00305, Pf01477		TRIAE_CS42_2AL_TGACv1_093994_AA0290870			1	0.689	-0.54	0.065896	0.556516	15.05	27.8912	121.4	78.6	14.95	19.52	3	3	125.4	136.5	101.1	81.2	93.2	62.6
High	Master Protein	A0A1D6AQV8	aconitate hydratase [OS=Triticum aestivum]	0	224.81	54	36	559	6	1	977	106.2	6.83	1577	1511	454.05	405.52	36	35	34	34	metabolic process		catalytic activity;metal ion binding	Pf00330, Pf00694		TRIAE_CS42_6BL_TGACv1_500845_AA1610610			37	0.904	-0.14	0.679596	0.983028	17.37	28.5505	104.2	95.8	8.54	3.61	3	3	103.5	95.5	113.2	99.7	92.9	95.1
High	Master Protein	A0A0C4BJE5	Serine hydroxymethyltransferase [OS=Triticum aestivum]	0	222.729	75	29	487	29	1	510	56.1	8.21	1652	1765	358.35	393.38	26	26	28	29	metabolic process		catalytic activity	Pf00155, Pf00464, Pf01212		TRIAE_CS42_4AL_TGACv1_290462_AA0985660; TRIAE_CS42_4DS_TGACv1_362836_AA1182360			0	1.636	0.71	0.00711606	0.140858	29.37	29.1726	78.3	121.7	17	8.06	3	3	64.1	90.5	79.7	130.5	123.9	111.2
High	Master Protein	W5FL28	Lipoxygenase [OS=Triticum aestivum]	0	222.677	51	37	529	8	1	928	105.4	6.11	1540	1147	396.87	311.5	36	35	33	33	metabolic process		catalytic activity;metal ion binding;protein binding	Pf00305, Pf01477		TRIAE_CS42_5BS_TGACv1_423430_AA1376740			0	0.601	-0.74	0.0232366	0.324582	10.44	24.8728	124.4	75.6	5	4.29	3	3	133.4	124.1	121.3	75.4	70.1	75.7
High	Master Protein	A0A1D6RWC5	Uncharacterized protein [OS=Triticum aestivum]	0	221.915	66	43	504	4	1	813	90.1	5.29	1433	1332	364.84	346.68	38	40	36	36			catalytic activity;nucleotide binding	Pf00004, Pf00910, Pf01057, Pf01078, Pf02359, Pf02933, Pf05496, Pf06068, Pf07724, Pf07728, Pf13173, Pf13191, Pf13207, Pf13238, Pf13401		TRIAE_CS42_4AS_TGACv1_306870_AA1014350			0	0.864	-0.21	0.825456	0.985276	25.68	21.8766	109.4	90.6	5.49	7.35	3	3	114.8	102.9	109.9	84	91	97.4
High	Master Protein	A0A1D6B9G2	Phenylalanine ammonia-lyase [OS=Triticum aestivum]	0	220.369	61	33	538	27	1	747	80.4	6.49	1797	1962	419.87	436.88	32	33	31	30	metabolic process	cytoplasm	catalytic activity	Pf00221		TRIAE_CS42_6DL_TGACv1_528045_AA1711020			7	1.05	0.07	0.710621	0.983028	26.42	29.4747	98.4	101.6	12.29	3.68	3	3	87.4	97.2	111.5	105.5	98.2	100.3
High	Master Protein	W5G1K5	Elongation factor Ts, mitochondrial [OS=Triticum aestivum]	0	220.271	54	43	446	8	1	1007	109	5.24	1401	1476	326.59	357.41	37	36	38	39	metabolic process	mitochondrion	protein binding;RNA binding	Pf00575, Pf00627, Pf00889		TRIAE_CS42_5DS_TGACv1_457027_AA1481200			35	1.089	0.12	0.576485	0.966636	41.87	27.9206	98	102	4.13	5.4	3	3	95.8	103.9	98.6	102.6	104.7	94.4
High	Master Protein	A0A1D5YU28	Elongation factor Ts, mitochondrial [OS=Triticum aestivum]	0	219.391	71	43	468	8	1	841	91	4.87	1289	1512	330.68	376.14	39	37	36	38	metabolic process	mitochondrion	protein binding;RNA binding	Pf00575, Pf00627, Pf00889		TRIAE_CS42_5AS_TGACv1_393304_AA1270960			0	0.804	-0.32	0.439886	0.947919	27.45	24.5629	105.7	94.3	9.8	14.43	3	3	107.7	110.5	91.7	83	96.2	110.9
High	Master Protein	P12782	Phosphoglycerate kinase, chloroplastic [OS=Triticum aestivum]	0	218.99	74	32	750	13	1	480	49.8	7.03	2207	2677	581.63	647.18	32	32	30	30	metabolic process		catalytic activity;nucleotide binding	Pf00162	543496	TRIAE_CS42_1AL_TGACv1_002632_AA0044010	LOC543496		19	1.148	0.2	0.403538	0.943753	32.81	30.2759	94.6	105.4	8.03	1.94	3	3	96.4	84	97.3	109.5	105.4	107.5
High	Master Protein	F1DKC1	catalase [OS=Triticum aestivum]	0	218.67	71	26	577	2	1	494	56.8	7.08	1215	1175	433.28	370.32	26	26	26	25	metabolic process;response to stimulus		antioxidant activity;catalytic activity;metal ion binding	Pf00199, Pf06628	100682478	TRIAE_CS42_6DS_TGACv1_545065_AA1749890	CAT3		29	0.749	-0.42	0.161669	0.793219	15.86	29.3309	109.6	90.4	12.6	6.4	3	3	131.6	106.2	106.8	88.4	88.1	78.8
High	Master Protein	F4Y594	heat shock protein 90 [OS=Triticum aestivum]	0	217.112	55	33	472	3	1	700	80.4	5.06	1372	1431	363.55	380.95	32	31	30	30	metabolic process;response to stimulus		nucleotide binding;protein binding	Pf00183, Pf02518, Pf13589					0	0.954	-0.07	0.864047	0.986776	49.37	22.9558	106.5	93.5	14.21	11.3	3	3	103.7	95.7	125.4	81.7	102.4	91
High	Master Protein	A0A1D6AUX8	Uncharacterized protein [OS=Triticum aestivum]	0	216.314	74	25	572	1	1	475	54.7	6.9	1163	1137	426.07	365.35	25	25	25	25	metabolic process;response to stimulus		antioxidant activity;catalytic activity;metal ion binding	Pf00199, Pf06628		TRIAE_CS42_6BS_TGACv1_513206_AA1634480			0	1.221	0.29	0.142109	0.769745	62.08	21.0312	90	110	15.26	60.03	3	3	72.6	80.6	97.6	98.5	193.5	57.2
High	Master Protein	A0A1D5UKX4	Adenosylhomocysteinase [OS=Triticum aestivum]	0	215.666	83	33	1017	5	1	485	53.2	5.9	2352	2456	779.21	749.59	32	32	33	32	metabolic process		catalytic activity;nucleotide binding	Pf00670, Pf02254, Pf02826, Pf02882, Pf05221, Pf13241		TRIAE_CS42_2AL_TGACv1_094077_AA0292200; TRIAE_CS42_2DL_TGACv1_158777_AA0526010			34	0.902	-0.15	0.667738	0.983028	23.11	30.6561	108.9	91.1	6.93	0.2	3	3	110.5	112.9	99	92.4	92.4	92.7
High	Master Protein	W5B7Z6	Adenosylhomocysteinase [OS=Triticum aestivum]	0	215.105	82	32	968	2	1	485	53.2	5.8	2357	2382	748.43	716.12	32	32	32	31	metabolic process;transport		catalytic activity;nucleotide binding	Pf00670, Pf02254, Pf02826, Pf02882, Pf05221, Pf13241		TRIAE_CS42_2BL_TGACv1_129400_AA0381860			4	0.986	-0.02	0.969936	0.996939	20.15	25.8903	108.1	91.9	12.93	9.3	3	3	106.7	117.2	90.3	89.6	90.8	105.5
High	Master Protein	A0A1D6RJF4	Uncharacterized protein [OS=Triticum aestivum]	0	214.114	37	47	398	10	1	1752	197	4.69	1456	1232	343.83	267.23	45	46	36	35		membrane		Pf01496, Pf01576, Pf02463, Pf05622, Pf06160		TRIAE_CS42_2AL_TGACv1_095046_AA0306390			36	0.679	-0.56	0.0559185	0.516953	17.38	25.8957	122.3	77.7	20.7	17.42	3	3	139.1	126.2	91.5	67.3	95.5	80.3
High	Master Protein	A0A1D6DGU6	Uncharacterized protein [OS=Triticum aestivum]	0	213.603	60	35	519	4	1	791	87.6	5.15	2297	1782	427.16	388.71	31	32	30	29			nucleotide binding	Pf00012, Pf06723		TRIAE_CS42_U_TGACv1_642737_AA2122450			34	0.877	-0.19	0.566129	0.962	27.57	27.3343	110.1	89.9	12.96	7.55	3	3	112.4	91.3	117.5	86.5	91.8	100.4
High	Master Protein	A0A1D5XLU8	Uncharacterized protein [OS=Triticum aestivum]	0	213.221	71	33	587	5	1	651	71.2	5.25	2375	2372	508.84	460.09	30	31	27	27			nucleotide binding	Pf00012, Pf06723		TRIAE_CS42_4BL_TGACv1_321697_AA1064240			35	0.858	-0.22	0.490655	0.957414	22.37	29.357	111.4	88.6	10.57	10.32	3	3	112.8	94.9	116	84	89.7	102.5
High	Master Protein	A0A1D6CT03	Uncharacterized protein [OS=Triticum aestivum]	0	212.211	49	38	495	2	1	836	96	5.21	1402	1530	366.02	392.67	35	36	32	34	metabolic process;response to stimulus		nucleotide binding;protein binding	Pf00183, Pf02518, Pf13589		TRIAE_CS42_7DL_TGACv1_604456_AA1998280			41	0.889	-0.17	0.616242	0.977367	28.9	28.2468	109.2	90.8	14.8	13.92	3	3	122	107.2	90.5	89.2	108.1	83.1
High	Master Protein	A0A1D6CJM8	Uncharacterized protein [OS=Triticum aestivum]	0	211.859	52	34	473	6	1	743	85.6	5	1395	1299	377.98	363.3	33	32	30	30	metabolic process;response to stimulus		nucleotide binding;protein binding	Pf00183, Pf02518, Pf13589		TRIAE_CS42_7BS_TGACv1_593752_AA1954160			19	0.88	-0.18	0.579398	0.967746	34.72	26.2394	110.8	89.2	10.91	10.31	3	3	108	95.6	119	87	87	103.5
High	Master Protein	A0A1D5VZ33	ATP synthase subunit beta [OS=Triticum aestivum]	0	209.706	68	30	587	4	1	551	58.9	6.24	1722	1846	499.93	483.48	27	28	29	28	metabolic process;transport		catalytic activity;nucleotide binding;transporter activity	Pf00006, Pf00306, Pf02874, Pf11421		TRIAE_CS42_3B_TGACv1_222532_AA0766530			0	0.95	-0.07	0.932131	0.992737	21.93	23.4845	103.4	96.6	15.58	6.83	3	3	84.8	116.3	103.6	96.8	105.8	92.7
High	Master Protein	A0A1D5XSS6	Uncharacterized protein [OS=Triticum aestivum]	0	208.179	61	29	554	1	1	648	71.1	5.16	1831	1642	479.58	442.75	26	26	27	28			nucleotide binding	Pf00012, Pf06723		TRIAE_CS42_4BS_TGACv1_328914_AA1095570			9	0.8	-0.32	0.351537	0.942528	19.69	25.4636	118.1	81.9	13	12.82	3	3	121.8	95.1	118.5	81.1	82.2	101.2
High	Master Protein	A0A1D5YA63	Uncharacterized protein [OS=Triticum aestivum]	0	207.617	61	29	533	1	1	648	71.1	5.19	1774	1626	467.2	427.1	26	26	27	28			nucleotide binding	Pf00012, Pf06723		TRIAE_CS42_4DS_TGACv1_362595_AA1180930			0	0.799	-0.32	0.681634	0.983028	28.1	19.0928	120.4	79.6	36.05	59.55	3	3	168	123.6	78.9	28.5	119.2	81.8
High	Master Protein	A0A1D6BHW3	Uncharacterized protein [OS=Triticum aestivum]	0	206.831	50	37	489	1	1	807	92.6	4.97	1342	1457	357.79	389.81	35	36	32	33	metabolic process;response to stimulus		nucleotide binding;protein binding	Pf00183, Pf02518, Pf13589		TRIAE_CS42_7AL_TGACv1_556087_AA1755000			0	0.765	-0.39	0.515776	0.957414	13.12	20.7843	113.3	86.7	61.56	9.95	3	3	148.8	126.3	30.6	96.7	108.4	89.1
High	Master Protein	P12112	ATP synthase subunit alpha, chloroplastic [OS=Triticum aestivum]	0	205.611	56	28	1367	26	1	504	55.3	6.48	4063	5499	1070.74	1420.17	24	24	26	28	metabolic process;transport	membrane	catalytic activity;nucleotide binding;transporter activity	Pf00006, Pf00306, Pf02874	543415; 803205		IVR1; atpA		2	1.297	0.38	0.1398	0.767452	29.41	30.8289	84.3	115.7	13.27	10.44	3	3	81.9	102.7	82.6	121.2	113.4	98.4
High	Master Protein	A0A1D5YLT8	aconitate hydratase [OS=Triticum aestivum]	0	205.062	47	33	445	30	1	995	106.9	7.06	1214	1155	323.04	353.45	32	31	31	31	metabolic process		catalytic activity;metal ion binding	Pf00330, Pf00694		TRIAE_CS42_5AL_TGACv1_376232_AA1234150			0	0.949	-0.07	0.874064	0.989629	20	27.5589	103.3	96.7	4.51	8.66	3	3	106.7	98.2	105.8	103.2	99	87.1
High	Master Protein	D8L9G6	alpha-1,4 glucan phosphorylase [OS=Triticum aestivum]	0	201.017	57	34	480	19	1	832	93.7	7.58	1552	1690	388.94	393.19	33	33	31	31	metabolic process		catalytic activity	Pf00343					18	0.965	-0.05	0.940141	0.993156	26.5	27.6238	102.9	97.1	10.38	1.75	3	3	91.6	103.8	112.8	98.6	95.4	97.9
High	Master Protein	A0A1D6AAQ1	Elongation factor Tu [OS=Triticum aestivum]	0	200.777	61	22	586	21	1	470	50.4	6.28	2372	2667	508.01	509.18	21	21	22	22	metabolic process		catalytic activity;nucleotide binding;RNA binding	Pf00009, Pf03143, Pf03144		TRIAE_CS42_6AL_TGACv1_472646_AA1524360			1	1.108	0.15	0.516578	0.957414	28.76	28.9173	96.1	103.9	6.01	13.15	3	3	98.9	99.5	89.2	116.3	89.3	106.8
High	Master Protein	A0A1D5Y5T3	Uncharacterized protein [OS=Triticum aestivum]	0	199.724	65	33	513	3	1	650	70.1	7.85	1398	1456	380.64	360.68	32	32	30	30	metabolic process		catalytic activity;metal ion binding	Pf00408, Pf02878, Pf02879, Pf02880		TRIAE_CS42_4DS_TGACv1_361179_AA1162870			0	0.974	-0.04	0.939174	0.992922	22.91	25.728	100.9	99.1	14.98	9.94	3	3	117.8	97	88.3	95.2	110.1	91.5
High	Master Protein	A0A1D5S807	Uncharacterized protein [OS=Triticum aestivum]	0	198.964	68	29	553	2	1	648	71	5.25	1889	1863	469.38	426.47	27	27	25	26			nucleotide binding	Pf00012, Pf06723		TRIAE_CS42_1BL_TGACv1_030626_AA0096230			0	0.836	-0.26	0.697325	0.983028	26.26	22.2667	111.4	88.6	23.91	23.46	3	3	138.9	103.5	87.5	82.3	73.9	113.9
High	Master Protein	A0A1D5T371	Uncharacterized protein [OS=Triticum aestivum]	0	196.804	55	32	585	1	1	682	72.9	5.19	2100	2398	513.37	507.48	29	29	30	31	metabolic process		nucleotide binding;protein binding	Pf00012, Pf06723		TRIAE_CS42_1DS_TGACv1_080760_AA0253350			18	1.082	0.11	0.599089	0.970428	26.9	27.9766	95.2	104.8	4.37	0.91	3	3	97.4	96.2	89.7	106	106.2	104.4
High	Master Protein	A0A1D5VD86	Uncharacterized protein [OS=Triticum aestivum]	0	196.389	78	34	441	1	1	557	60.6	5.68	1164	1042	335.15	332.62	31	30	32	31	metabolic process	cytoplasm	catalytic activity;metal ion binding	Pf01676, Pf06415		TRIAE_CS42_3AL_TGACv1_196039_AA0656760			36	0.873	-0.2	0.548629	0.960787	18.87	28.7915	105.4	94.6	3.48	1.59	3	3	109.8	102.5	105.6	95.1	94.7	92.3
High	Master Protein	A0A1D5TBU1	Adenosylhomocysteinase [OS=Triticum aestivum]	0	196.188	74	30	947	4	1	485	53.2	5.92	2137	2104	734.82	705	29	29	30	30	metabolic process		catalytic activity;nucleotide binding	Pf00670, Pf02254, Pf02826, Pf02882, Pf05221, Pf13241		TRIAE_CS42_2AL_TGACv1_094486_AA0298610			2	0.913	-0.13	0.816155	0.985276	19.74	25.5651	102.1	97.9	5.05	2.87	3	3	101.6	109.5	99.7	93.3	97.4	98.5
High	Master Protein	A0A1D5WYC0	Uncharacterized protein [OS=Triticum aestivum]	0	195.517	65	33	482	3	1	652	70.2	7.33	1403	1346	352.82	337.96	32	32	30	30	metabolic process		catalytic activity;metal ion binding	Pf00408, Pf02878, Pf02879, Pf02880		TRIAE_CS42_4AL_TGACv1_288277_AA0943460			34	0.959	-0.06	0.913917	0.991839	27.52	28.9386	101.4	98.6	4.8	2.05	3	3	97.8	100.8	107.4	96	100	98
High	Master Protein	A0A1D5YDJ7	Lipoxygenase [OS=Triticum aestivum]	0	194.907	56	31	471	4	1	802	89.4	6.48	1363	1010	420.41	345.83	30	31	27	27	metabolic process		catalytic activity;metal ion binding;protein binding	Pf00305, Pf01477		TRIAE_CS42_5AL_TGACv1_374359_AA1197930			0	0.625	-0.68	0.0519942	0.516393	11.88	23.736	116.3	83.7	24.21	5.06	3	3	156.5	110.1	101.2	72.9	79.2	80.1
High	Master Protein	A0A1D6BX53	6-phosphogluconate dehydrogenase, decarboxylating [OS=Triticum aestivum]	0	194.668	63	23	462	21	1	531	58.6	8.53	1752	1930	386.63	426.5	23	23	23	23	metabolic process		catalytic activity	Pf00393, Pf03446		TRIAE_CS42_7AS_TGACv1_570191_AA1831910			3	0.847	-0.24	0.448046	0.951716	22.7	27.9403	108.6	91.4	6.86	2.57	3	3	107.9	100.8	115.7	90.2	90.8	94.6
High	Master Protein	A0A1D5XPE7	Uncharacterized protein [OS=Triticum aestivum]	0	194.362	61	20	697	2	1	455	50.4	7.71	2561	2783	573.2	638.88	19	19	20	20			nucleotide binding	Pf00004, Pf06309		TRIAE_CS42_4BS_TGACv1_327886_AA1077780			13	1.466	0.55	0.0342357	0.408116	37	26.5265	81.9	118.1	7.12	18.51	3	3	81.8	76.4	88.1	139.8	96.1	117.9
High	Master Protein	A0A1D6DGU9	Uncharacterized protein [OS=Triticum aestivum]	0	193.378	61	34	431	6	1	784	87.3	5.22	1520	1411	332.19	311.71	31	31	28	26			nucleotide binding	Pf00012, Pf06723		TRIAE_CS42_U_TGACv1_642737_AA2122480			4	0.733	-0.45	0.21743	0.872664	26.41	24.7146	110.2	89.8	11.65	13.03	3	3	124.1	115.1	98.3	74.3	93.8	94.3
High	Master Protein	A0A1D5URS1	Adenosylhomocysteinase [OS=Triticum aestivum]	0	192.496	74	29	934	3	1	485	53.2	6.05	2076	2052	726.22	697.96	28	28	29	28	metabolic process		catalytic activity;nucleotide binding	Pf00670, Pf02254, Pf02826, Pf02882, Pf05221, Pf13241		TRIAE_CS42_2DL_TGACv1_160591_AA0552150			0	0.863	-0.21	0.704491	0.983028	7.65	23.8701	107.3	92.7	3.17	8.08	3	3	106.2	105.7	111.8	91.7	84.9	99.8
High	Master Protein	A0A1D5RP81	Uncharacterized protein [OS=Triticum aestivum]	0	191.873	50	24	533	24	1	625	67.4	6.77	1469	1615	423.69	420.49	24	24	22	22	metabolic process		catalytic activity;metal ion binding	Pf01450, Pf07991		TRIAE_CS42_1AL_TGACv1_000056_AA0001780			0	1.051	0.07	0.707495	0.983028	36.72	28.2823	100.6	99.4	5.92	2.11	3	3	93.8	101	105.5	99.7	102.1	98
High	Master Protein	W5FPN2	Uncharacterized protein [OS=Triticum aestivum]	0	191.239	75	23	586	2	1	446	48.1	5.68	2264	1544	533.36	464.43	23	23	22	22	metabolic process		catalytic activity;metal ion binding	Pf00113, Pf03952		TRIAE_CS42_5BS_TGACv1_423649_AA1381290			26	0.927	-0.11	0.777585	0.98358	25.38	29.0103	105.1	94.9	1.87	1.25	3	3	107.2	104.8	103.3	94.7	96.2	93.8
High	Master Protein	A0A1D5YVK0	Uncharacterized protein [OS=Triticum aestivum]	0	190.406	70	22	572	1	1	446	48	5.55	2165	1337	526.38	436.05	22	22	21	21	metabolic process		catalytic activity;metal ion binding	Pf00113, Pf03952		TRIAE_CS42_5AS_TGACv1_394202_AA1278730			2	0.929	-0.11	0.888942	0.990309	21.53	25.4887	99.1	100.9	21.46	3.96	3	3	132.1	91.8	93.8	95.6	96.8	89.8
High	Master Protein	W5FX66	Methylenetetrahydrofolate reductase [OS=Triticum aestivum]	0	190.371	75	34	549	2	1	594	66.3	5.64	1120	1062	399.47	394.8	34	34	34	34	metabolic process		catalytic activity	Pf02219		TRIAE_CS42_5DL_TGACv1_433211_AA1405590; TRIAE_CS42_5AL_TGACv1_374680_AA1206310			0	0.813	-0.3	0.515181	0.957414	10.11	23.4886	113.9	86.1	11.96	4.43	3	3	115.7	96.4	121.9	87.5	85.5	93.1
High	Master Protein	W5FEK8	Methylenetetrahydrofolate reductase [OS=Triticum aestivum]	0	189.939	75	34	537	2	1	594	66.2	5.64	1163	1084	389.38	393.34	34	34	34	34	metabolic process		catalytic activity	Pf02219		TRIAE_CS42_5BL_TGACv1_406345_AA1344380			35	0.832	-0.27	0.394892	0.943753	19.44	28.3424	112.3	87.7	1.36	5.68	3	3	112.9	110.7	110	85.4	86.4	94.6
High	Master Protein	W5GAT4	Uncharacterized protein [OS=Triticum aestivum]	0	189.426	37	40	320	9	1	1789	193.4	6.1	951	869	213.59	235.6	34	34	33	32			protein binding	Pf03154, Pf12807, Pf13374, Pf13414, Pf13424, Pf15044, Pf15279		TRIAE_CS42_6AL_TGACv1_472065_AA1517340			7	1.122	0.17	0.355422	0.942528	47.24	23.5875	105.4	94.6	1.35	19.78	3	3	101.7	100.8	99	86	90.4	122.1
High	Master Protein	A0A1D6AMU3	Uncharacterized protein [OS=Triticum aestivum]	0	188.095	40	41	328	14	1	1790	193.4	6.21	953	1238	222.19	254.22	35	33	34	32			protein binding	Pf05109, Pf12807, Pf13374, Pf13414, Pf13424, Pf15044, Pf15279		TRIAE_CS42_6BL_TGACv1_499887_AA1594060			28	1.084	0.12	0.590287	0.970428	33.58	25.9494	92	108	4.95	13.36	3	3	90.1	99.4	95.5	88.8	112.3	113.9
High	Master Protein	A0A1D5RYQ8	Uncharacterized protein [OS=Triticum aestivum]	0	186.447	68	29	526	2	1	648	71	5.25	1759	1734	447.37	412.46	27	27	25	26			nucleotide binding	Pf00012, Pf06723		TRIAE_CS42_1AL_TGACv1_002910_AA0046290			10	0.922	-0.12	0.752998	0.983136	28.6	25.828	116.2	83.8	15.55	16.44	3	3	122.4	90.9	118.5	85.5	77	105.6
High	Master Protein	W5AUD8	Uncharacterized protein [OS=Triticum aestivum]	0	186.426	80	27	483	3	1	479	53.3	6.7	1015	1282	292.16	390.37	25	25	27	27	metabolic process;regulation of biological process;response to stimulus		catalytic activity;metal ion binding;nucleotide binding;protein binding	Pf00004, Pf00158, Pf01078, Pf01434, Pf05496, Pf06068, Pf06480, Pf07724, Pf07726, Pf07728, Pf13191, Pf13401, Pf14532		TRIAE_CS42_2AL_TGACv1_093165_AA0273840; TRIAE_CS42_2DL_TGACv1_158041_AA0507040			32	1.542	0.62	0.0172511	0.262694	31.56	27.7148	78.4	121.6	14.27	5.77	3	3	73.1	75	93.9	127.2	114.4	116.4
High	Master Protein	A0A1D6B773	Uncharacterized protein [OS=Triticum aestivum]	0	186.424	36	38	315	7	1	1793	193.5	6.16	972	1161	210.17	233.78	33	32	31	30			protein binding	Pf03154, Pf12807, Pf13374, Pf13414, Pf13424, Pf15044, Pf15279		TRIAE_CS42_6DL_TGACv1_527242_AA1701050			0	1.22	0.29	0.193856	0.835584	40.36	22.6258	86.6	113.4	17.22	2.42	3	3	82.3	109.4	82.1	107.7	106.8	111.8
High	Master Protein	W5D322	Uncharacterized protein [OS=Triticum aestivum]	0	186.221	76	33	440	4	1	557	60.6	5.6	1334	1176	341.72	331.66	30	29	32	32	metabolic process	cytoplasm	catalytic activity;metal ion binding	Pf01676, Pf06415		TRIAE_CS42_3B_TGACv1_222141_AA0758150			0	0.754	-0.41	0.263629	0.900585	14.85	24.1334	118.2	81.8	17.12	4.1	3	3	128.7	124.7	92.7	86.3	80.7	87
High	Master Protein	A0A1D6C4E9	Uncharacterized protein [OS=Triticum aestivum]	0	186.156	76	27	426	10	1	413	46.9	7.08	1551	1245	344.9	310.37	26	26	27	27	metabolic process		protein binding;RNA binding	Pf00043, Pf00647, Pf02798, Pf13409, Pf13410, Pf13417, Pf14497		TRIAE_CS42_7BL_TGACv1_577268_AA1870700			22	1.022	0.03	0.819139	0.985276	29.35	28.5771	97.5	102.5	6.45	2.37	3	3	95.4	96.7	107.1	97.5	101.6	101.7
High	Master Protein	A0A1D5WKF4	Uncharacterized protein [OS=Triticum aestivum]	0	184.561	72	33	422	1	1	585	63.6	5.68	1169	1097	315.97	316.9	30	29	31	30	metabolic process	cytoplasm	catalytic activity;metal ion binding	Pf01676, Pf06415		TRIAE_CS42_3DL_TGACv1_251020_AA0876220			1	0.756	-0.4	0.320649	0.933791	15.5	23.5707	106.7	93.3	17.83	16.22	3	3	110.4	129.3	90.1	73.3	96.6	100.2
High	Master Protein	A0A1D5Y2X9	Uncharacterized protein [OS=Triticum aestivum]	0	184.068	68	29	531	3	1	592	64.6	4.93	2114	2154	465.92	416.93	27	27	26	25	cell organization and biogenesis		nucleotide binding	Pf00012, Pf06723		TRIAE_CS42_4DL_TGACv1_344347_AA1146290			0	0.718	-0.48	0.281646	0.918961	20.79	23.1927	117.8	82.2	14.38	16.15	3	3	117.2	125.1	94.1	77.7	81.8	104.1
High	Master Protein	W4ZY98	Uncharacterized protein [OS=Triticum aestivum]	0	183.01	49	31	565	1	1	684	73.2	5.19	1963	2230	487.33	486.37	28	28	29	30	cell organization and biogenesis;metabolic process		nucleotide binding;protein binding	Pf00012, Pf06723		TRIAE_CS42_1AS_TGACv1_019410_AA0066270			0	1.002	0	0.704316	0.983028	13.53	24.4011	102.4	97.6	8.44	4.58	3	3	108.3	103.9	91.8	94	103	99
High	Master Protein	A0A1D6S260	Uncharacterized protein [OS=Triticum aestivum]	0	182.849	68	21	564	2	1	446	48	5.68	2068	1550	505.08	435.7	21	21	21	21	metabolic process		catalytic activity;metal ion binding	Pf00113, Pf03952		TRIAE_CS42_5AS_TGACv1_393357_AA1271740			0	0.924	-0.11	0.972892	0.996973	14.41	24.3873	96.2	103.8	16.18	3.79	3	3	120.8	93	91.7	100.4	100.2	93.9
High	Master Protein	A0A1D6A2S3	Uncharacterized protein [OS=Triticum aestivum]	0	182.19	70	22	556	1	1	446	48	5.55	2164	1375	515.17	421.23	22	22	21	21	metabolic process		catalytic activity;metal ion binding	Pf00113, Pf03952		TRIAE_CS42_5DS_TGACv1_457334_AA1485300			0	0.919	-0.12	0.950834	0.994922	7.45	22.6398	103.3	96.7	9.77	3.34	3	3	90.2	105.8	108.6	99	95	101.5
High	Master Protein	A0A1D5Z315	Uncharacterized protein [OS=Triticum aestivum]	0	182.097	69	31	828	1	1	557	60	6.02	1951	1694	667.64	574.4	30	30	30	30	metabolic process		catalytic activity	Pf01704		TRIAE_CS42_5BL_TGACv1_404975_AA1316790			34	0.994	-0.01	0.936431	0.992737	25.42	29.5486	102.5	97.5	5.51	5.08	3	3	102	96.7	107.9	103	93.2	97.2
High	Master Protein	A0A1D6S517	Uncharacterized protein [OS=Triticum aestivum]	0	180.992	69	31	827	1	1	553	59.7	6.38	1980	1666	667.69	573.57	30	30	30	30	metabolic process		catalytic activity	Pf01704		TRIAE_CS42_5DL_TGACv1_433008_AA1397780			0	0.93	-0.1	0.925472	0.992737	16.78	25.2101	99.3	100.7	18.31	7.22	3	3	128	92.9	96.3	97.7	98.6	86.4
High	Master Protein	A0A1D5UMB2	Uncharacterized protein [OS=Triticum aestivum]	0	180.627	31	39	336	8	1	1752	197.1	4.72	1184	1126	299.49	234.5	38	38	30	29		membrane		Pf00038, Pf06160, Pf12128		TRIAE_CS42_2DL_TGACv1_159112_AA0532660			1	0.632	-0.66	0.0975225	0.669967	15.07	22.978	125.2	74.8	27.84	19.4	3	3	153.1	133.5	85.9	59.6	88.3	79.7
High	Master Protein	P32112	Adenosylhomocysteinase [OS=Triticum aestivum]	0	179.625	74	27	880	1	1	485	53.4	5.92	2129	2154	688.7	650.14	27	27	27	26	metabolic process;transport		catalytic activity;nucleotide binding	Pf00670, Pf02254, Pf02826, Pf02882, Pf05221, Pf13241	543491		SH6.2		0	0.7	-0.52	0.211121	0.864655	26.17	21.5178	112.5	87.5	19.8	39.56	3	3	145.3	119.4	97.5	92.8	43.4	101.6
High	Master Protein	A0A1D6DGY8	Uncharacterized protein [OS=Triticum aestivum]	0	178.58	53	30	538	1	1	686	73.2	5.19	1762	2146	461.17	466.17	27	27	28	29	metabolic process		nucleotide binding;protein binding	Pf00012, Pf06723		TRIAE_CS42_U_TGACv1_642785_AA2123220			0	0.921	-0.12	0.978979	0.997576	33.96	20.3787	104.1	95.9	25.68	48.67	3	3	122.2	73.1	92.9	65.1	85.5	161.1
High	Master Protein	W5H8Z0	Uncharacterized protein [OS=Triticum aestivum]	0	177.483	67	24	418	7	1	413	46.8	6.57	1360	1258	327.19	319.4	24	24	24	24	metabolic process		protein binding;RNA binding	Pf00043, Pf00647, Pf02798, Pf13409, Pf13410, Pf13417, Pf14497		TRIAE_CS42_7AL_TGACv1_557743_AA1785510			0	1.144	0.19	0.344929	0.942528	31.49	25.7516	95	105	20.2	2.48	3	3	81.6	92.8	120.2	102.6	99	103.8
High	Master Protein	A0A1D6AHD7	Uncharacterized protein [OS=Triticum aestivum]	0	175.999	67	24	436	3	1	442	50	5.69	1428	1349	317.75	314.13	23	23	22	21		membrane	catalytic activity;nucleotide binding	Pf00270, Pf00271, Pf13245		TRIAE_CS42_6AS_TGACv1_486486_AA1561760			26	0.933	-0.1	0.803226	0.984397	26.16	28.2453	106.2	93.8	6.99	9.3	3	3	107.7	98.6	113.4	95.1	84	101.1
High	Master Protein	A0A1D6CX76	Uncharacterized protein [OS=Triticum aestivum]	0	175.92	60	33	355	9	1	800	87.9	8.57	1137	1188	300.02	254.12	32	31	30	30			protein binding	Pf07676		TRIAE_CS42_7DS_TGACv1_621614_AA2021170			26	0.709	-0.5	0.0912698	0.654653	15.13	27.2809	114.5	85.5	5.19	6.45	3	3	121.5	109.7	114.3	79.1	85.4	90
High	Master Protein	A0A1D5RZA3	tubulin beta chain [OS=Triticum aestivum]	0	174.914	66	24	470	5	1	482	54.5	4.88	1780	1593	391.42	353.63	24	24	22	23	cell organization and biogenesis		catalytic activity;nucleotide binding;structural molecule activity	Pf00091, Pf03953		TRIAE_CS42_1AL_TGACv1_003346_AA0049250			27	0.984	-0.02	0.976179	0.996973	30.57	28.9042	104	96	10.48	11.17	3	3	100	93.5	114.5	92.2	90	109.9
High	Master Protein	Q7FYS2	Protein disulfide-isomerase [OS=Triticum aestivum]	0	174.721	70	33	442	7	1	515	56.5	5.1	1297	1176	329.4	312.52	32	33	31	31	cellular homeostasis;metabolic process;regulation of biological process	endoplasmic reticulum;organelle lumen	catalytic activity	Pf00085, Pf13098, Pf13848, Pf13899, Pf13905		TRIAE_CS42_4AL_TGACv1_290681_AA0988180			26	0.837	-0.26	0.414021	0.943753	25.29	29.1695	112.9	87.1	21.15	13.08	3	3	136.1	108.8	89.2	83.9	101.8	80.1
High	Master Protein	Q41525	Acetyl-CoA carboxylase [OS=Triticum aestivum]	0	173.96	25	39	278	2	1	2260	251.2	6.44	842	861	174.83	178	31	35	28	31	metabolic process		catalytic activity;metal ion binding;nucleotide binding	Pf00289, Pf00364, Pf01039, Pf02222, Pf02655, Pf02785, Pf02786, Pf07478, Pf08326, Pf13535, Pf15632					36	0.921	-0.12	0.88976	0.990309	28.22	25.0014	106.1	93.9	18	22.82	3	3	102.5	89.1	126.8	90.7	74.2	116.7
High	Master Protein	A0A1D5X761	Uncharacterized protein [OS=Triticum aestivum]	0	172.268	56	16	450	3	1	458	48.1	4.63	1394	1627	366.83	390.03	15	15	15	16			protein binding	Pf00023, Pf12796, Pf13606, Pf13637, Pf13857		TRIAE_CS42_4AL_TGACv1_290598_AA0987300			23	0.973	-0.04	0.976791	0.996973	37.38	27.6784	111.4	88.6	26.55	14.67	3	3	121.6	113.3	71.1	89.4	114.6	90
High	Master Protein	W4ZUZ6	Dihydrolipoyl dehydrogenase [OS=Triticum aestivum]	0	171.035	60	22	348	19	1	502	52.7	7.18	718	925	239.78	282.76	20	20	22	21	cellular homeostasis;metabolic process;regulation of biological process		catalytic activity;nucleotide binding	Pf00070, Pf01134, Pf02852, Pf07992, Pf12831		TRIAE_CS42_1AS_TGACv1_019394_AA0066090			5	1.079	0.11	0.609217	0.973876	26.15	27.166	94.1	105.9	1.06	8.71	3	3	95.4	97.2	95.5	110.7	107.4	93.7
High	Master Protein	A0A1D5ZWY5	Uncharacterized protein [OS=Triticum aestivum]	0	170.938	60	16	431	3	1	398	41.7	4.6	1232	1426	352.03	363.64	15	15	13	14			protein binding	Pf00023, Pf12796, Pf13606, Pf13637, Pf13857		TRIAE_CS42_5DL_TGACv1_435835_AA1455370			0	0.881	-0.18	0.773987	0.98358	30.24	24.3806	97.6	102.4	11.65	1.47	3	3	98.2	106.2	84.1	102.9	103	105.6
High	Master Protein	A0A0C4BKH5	eukaryotic initiation factor eIF4A [OS=Triticum aestivum]	0	170.085	71	24	429	1	1	414	46.9	5.48	1381	1380	305.06	312.83	23	23	22	22	metabolic process		catalytic activity;nucleotide binding;RNA binding	Pf00270, Pf00271, Pf13245		TRIAE_CS42_7AL_TGACv1_558996_AA1797420; TRIAE_CS42_7BL_TGACv1_577395_AA1874350			2	0.879	-0.19	0.778486	0.98358	27.8	23.8452	103.8	96.2	4.84	11.78	3	3	102.5	112.6	105.7	80.5	98	100.8
High	Master Protein	A0A1D6D1N7	Uncharacterized protein [OS=Triticum aestivum]	0	169.846	49	23	401	2	1	621	69	5.34	1360	1222	327.4	316.84	23	23	21	21	metabolic process		catalytic activity	Pf00251, Pf08244		TRIAE_CS42_7DS_TGACv1_622753_AA2044770			1	0.925	-0.11	0.945964	0.994272	28.04	24.2069	93.8	106.2	24.44	8.31	3	3	89.3	88	132.3	101.1	87.5	101.7
High	Master Protein	W5BCV8	Uncharacterized protein [OS=Triticum aestivum]	0	169.409	80	26	430	2	1	479	53.3	6.99	1013	1279	265.35	355.52	23	23	26	26	metabolic process		catalytic activity	Pf00155		TRIAE_CS42_2BL_TGACv1_129605_AA0390160			0	1.412	0.5	0.0475428	0.494867	28.79	22.4633	85.9	114.1	9.51	11.51	3	3	81	81.4	95.3	105.1	129.2	108
High	Master Protein	Q8W431	Sucrose:fructan 6-fructosyltransferase [OS=Triticum aestivum]	0	168.728	50	25	403	5	1	616	68.4	5.5	1449	1192	346.22	312.14	25	25	22	22	metabolic process	membrane	catalytic activity	Pf00251, Pf08244	542773	TRIAE_CS42_4AL_TGACv1_288169_AA0939290	6-SFT		24	0.905	-0.14	0.683189	0.983028	21.81	27.7903	102.9	97.1	8.91	7.38	3	3	100.9	101.1	117.5	95.4	85.9	99.3
High	Master Protein	A0A1D6AP97	S-adenosylmethionine synthase [OS=Triticum aestivum]	0	168.64	67	19	686	4	1	406	44.3	6.18	1938	1715	442.29	347.31	18	18	18	18	metabolic process		catalytic activity;metal ion binding;nucleotide binding	Pf00438, Pf02772, Pf02773		TRIAE_CS42_6BL_TGACv1_500297_AA1602810			2	0.97	-0.04	0.962017	0.995167	27.68	25.9044	106.5	93.5	27.3	6.7	3	3	146.2	98.5	89.6	84	86.4	95.3
High	Master Protein	A0A1D5UPW5	Serine hydroxymethyltransferase [OS=Triticum aestivum]	0	167.962	73	22	432	19	1	471	51.4	7.24	860	1062	296.56	333.83	20	19	22	21	metabolic process		catalytic activity	Pf00155, Pf00464		TRIAE_CS42_2AL_TGACv1_094077_AA0292210; TRIAE_CS42_2DL_TGACv1_159916_AA0544360			4	1.013	0.02	0.858113	0.986776	30.32	28.4334	95.8	104.2	17.79	6.79	3	3	92.7	88.8	121.7	100.8	91.5	104.5
High	Master Protein	W5I0B0	Uncharacterized protein [OS=Triticum aestivum]	0	167.844	71	24	421	1	1	414	46.9	5.48	1342	1371	297.63	306.79	23	23	21	21			catalytic activity;nucleotide binding	Pf00270, Pf00271, Pf13245		TRIAE_CS42_7DL_TGACv1_603622_AA1986400			0
High	Master Protein	W5D791	Uncharacterized protein [OS=Triticum aestivum]	0	167.713	49	34	375	6	1	1172	127.5	6.16	1134	1344	282.35	326.58	32	31	32	30	metabolic process		catalytic activity;metal ion binding;nucleotide binding	Pf00289, Pf01071, Pf02142, Pf02222, Pf02786, Pf02787, Pf07478, Pf08442, Pf08443, Pf13535, Pf13549, Pf15632					28	1.049	0.07	0.714008	0.983028	20.08	26.7125	95.6	104.4	7.13	0.74	3	3	92.9	93.9	105.4	101.9	103.4	102.5
High	Master Protein	Q9M4V3	ribulose bisphosphate carboxylase activase B [OS=Triticum aestivum]	0	166.39	66	20	546	2	1	432	47.8	7.36	2138	2330	432.55	504.41	19	19	20	20			nucleotide binding	Pf00004, Pf06309	542853		RcaB		0
High	Master Protein	Q9ZRA9	Tubulin beta-4 chain [OS=Triticum aestivum]	0	165.836	67	22	450	4	1	445	50	4.87	1900	1577	380.4	333.91	22	21	21	22	cell organization and biogenesis	cytoplasm;cytoskeleton	catalytic activity;nucleotide binding;structural molecule activity	Pf00091, Pf03953	543260		Tubb4		2	0.896	-0.16	0.642601	0.981183	18.81	26.2614	110.4	89.6	1.64	11.31	3	3	112	108.4	109.8	80.2	89.1	100.5
High	Master Protein	A0A1D6C4W3	Uncharacterized protein [OS=Triticum aestivum]	0	165.609	46	20	344	2	1	688	72.9	5.54	1256	1492	297.27	305.22	18	18	20	19	metabolic process	membrane	catalytic activity;nucleotide binding	Pf00004, Pf00158, Pf01057, Pf01078, Pf01434, Pf05496, Pf06068, Pf06480, Pf07724, Pf07728, Pf13191, Pf13207, Pf13401		TRIAE_CS42_7BL_TGACv1_577339_AA1872680			25	1.275	0.35	0.165055	0.796101	28.16	26.6538	85.3	114.7	10.89	9.47	3	3	85.1	99.4	81.1	120.2	114.5	99.7
High	Master Protein	A0A1D6A916	Uncharacterized protein [OS=Triticum aestivum]	0	164.606	60	27	464	1	1	625	65	8.28	2276	2178	394.14	394.13	27	27	27	27	metabolic process	cytoplasm	catalytic activity;metal ion binding	Pf00883, Pf02789		TRIAE_CS42_6AL_TGACv1_472070_AA1517390			31	1.035	0.05	0.767329	0.98358	20.75	28.081	99.8	100.2	0.89	1.75	3	3	100.2	100.5	98.8	101.7	100.5	98.3
High	Master Protein	A4K4Y1	tubulin alpha chain [OS=Triticum aestivum]	0	164.079	64	21	443	6	1	451	49.7	5.02	1235	1203	368.11	335.97	19	19	20	21	cell organization and biogenesis	cytoplasm;cytoskeleton	catalytic activity;nucleotide binding;structural molecule activity	Pf00091, Pf03953		TRIAE_CS42_1BL_TGACv1_033414_AA0139290; TRIAE_CS42_1AL_TGACv1_001148_AA0026030; TRIAE_CS42_1DL_TGACv1_061245_AA0189800			18	0.925	-0.11	0.768998	0.98358	25.14	29.1686	107.2	92.8	6.39	9.45	3	3	104.9	97.5	110.8	90.8	90	106
High	Master Protein	W5HAH2	Uncharacterized protein [OS=Triticum aestivum]	0	163.879	69	26	377	1	1	488	54	5.25	1486	1229	300.95	310.05	24	25	25	24	metabolic process;transport		catalytic activity;nucleotide binding;transporter activity	Pf00006, Pf00306, Pf02874		TRIAE_CS42_7AL_TGACv1_558464_AA1793580			0	0.888	-0.17	0.926499	0.992737	30.82	22.6713	102.8	97.2	23.25	13.96	3	3	96.5	131.8	85.3	91.1	110.5	84.9
High	Master Protein	A0A1D6RQ37	Uncharacterized protein [OS=Triticum aestivum]	0	161.358	71	28	383	3	1	488	54.3	5.2	1518	1237	303.08	321.15	26	27	26	25	metabolic process;transport		catalytic activity;nucleotide binding;transporter activity	Pf00006, Pf00306, Pf02874		TRIAE_CS42_3AL_TGACv1_195878_AA0655140			28	1.068	0.1	0.645505	0.982902	22.87	27.6429	100.8	99.2	4.22	10.02	3	3	93.5	100.8	100.6	113	93.1	99
High	Master Protein	B2ZGL5	Cytosolic acetyl-CoA carboxylase [OS=Triticum aestivum]	0	161.169	25	37	288	1	1	2261	251.6	6.43	797	779	215.07	228.84	31	31	30	31	metabolic process		catalytic activity;metal ion binding;nucleotide binding	Pf00289, Pf00364, Pf01039, Pf02222, Pf02655, Pf02785, Pf02786, Pf07478, Pf08326, Pf13535, Pf15632					0	1.015	0.02	0.680105	0.983028	49.72	18.5619	99.3	100.7	28.25	48.71	3	3	123.1	92.8	69.5	59.9	94.2	160.4
High	Master Protein	A0A1D5WNC9	tubulin beta chain [OS=Triticum aestivum]	0	160.545	58	22	455	1	1	499	55.8	5.16	1725	1465	375.64	338.72	22	22	21	22	cell organization and biogenesis		catalytic activity;nucleotide binding;structural molecule activity	Pf00091, Pf03953		TRIAE_CS42_3DL_TGACv1_252143_AA0887870			3	0.837	-0.26	0.517836	0.957414	16.8	25.0897	113.3	86.7	8.72	13.73	3	3	114.6	98.6	115.7	79.5	87.7	103.9
High	Master Protein	A0A1D6CWT9	Uncharacterized protein [OS=Triticum aestivum]	0	160.427	78	25	419	6	1	472	49.6	6.55	917	863	295.03	282.6	22	22	25	25	metabolic process		catalytic activity	Pf00202		TRIAE_CS42_7DS_TGACv1_621557_AA2019270			0	1.181	0.24	0.26242	0.899389	25.97	25.2053	97.3	102.7	6.47	7.03	3	3	99.3	89.8	101.6	104.7	109.4	95.2
High	Master Protein	A0A1D6CEU0	Uncharacterized protein [OS=Triticum aestivum]	0	160.123	74	25	397	6	1	474	49.8	6.86	981	866	289.84	273.33	23	23	23	24	metabolic process		catalytic activity	Pf00202		TRIAE_CS42_7BS_TGACv1_592051_AA1929300			24	1.12	0.16	0.479268	0.957414	27.82	28.5438	96.4	103.6	4.25	1.69	3	3	93.1	95.5	101.1	105.4	102.5	102.3
High	Master Protein	D5MTF8	4-hydroxy-7-methoxy-3-oxo-3,4-dihydro-2H-1,4-benzoxazin-2-yl glucoside beta-D-glucosidase 1d, chloroplastic [OS=Triticum aestivum]	0	159.735	61	26	956	8	1	564	63.7	5.97	3034	1479	1029.84	644.76	23	23	24	25	metabolic process		catalytic activity	Pf00150, Pf00232	100682423	TRIAE_CS42_2AL_TGACv1_094425_AA0297430	TaGlu1d		0	0.755	-0.41	0.256866	0.895395	13.7	24.9361	113.5	86.5	5.1	11.96	3	3	108.3	119	117.9	73.2	90	91.6
High	Master Protein	Q5MCL9	Calreticulin-like protein [OS=Triticum aestivum]	0	159.525	64	25	432	1	1	415	47.2	4.67	1064	925	341.8	335.38	24	24	25	25	metabolic process	endoplasmic reticulum	metal ion binding;protein binding	Pf00262	606330		LOC606330		27	0.912	-0.13	0.713751	0.983028	33.36	29.6082	113.5	86.5	22.38	14.24	3	3	126.8	115.5	80.6	88	107.1	82
High	Master Protein	A0A1D6DKR8	Uncharacterized protein [OS=Triticum aestivum]	0	158.825	59	30	304	6	1	756	82.7	8.22	972	892	253.95	214.24	29	28	27	27				Pf07676		TRIAE_CS42_U_TGACv1_644908_AA2142260			0	0.749	-0.42	0.29466	0.922441	9.17	23.5648	115	85	11.82	1.52	3	3	115.5	101.1	128.2	86.2	83.7	85.3
High	Master Protein	B2ZGK3	Cytosolic acetyl-CoA carboxylase [OS=Triticum aestivum]	0	158.614	25	37	285	0	1	2260	251.2	6.44	799	776	219.32	224.53	32	32	29	29	metabolic process		catalytic activity;metal ion binding;nucleotide binding	Pf00289, Pf00364, Pf01039, Pf02222, Pf02655, Pf02785, Pf02786, Pf07478, Pf08326, Pf13535, Pf15632		TRIAE_CS42_U_TGACv1_641120_AA2086110			1	0.809	-0.31	0.652731	0.983028	9.29	19.6761	110.6	89.4	20.06		3	1	196.3	148.3	135.4		120
High	Master Protein	W5GYX5	glyceraldehyde-3-phosphate dehydrogenase [OS=Triticum aestivum]	0	157.675	77	23	1190	19	1	337	36.6	7.15	4646	5197	887.08	908.51	22	22	22	22	metabolic process		catalytic activity;nucleotide binding	Pf00044, Pf01113, Pf01408, Pf02800		TRIAE_CS42_6DL_TGACv1_526670_AA1689480			4	0.977	-0.03	0.993946	0.999395	23.9	30.49	103	97	5.69	4.4	3	3	94.5	105.1	103.7	97.7	103.7	95.3
High	Master Protein	A0A1D6S8R5	Uncharacterized protein [OS=Triticum aestivum]	0	157.373	44	24	430	18	1	665	73.2	5.21	1274	1069	345.52	316.17	23	23	24	24			nucleotide binding	Pf00012, Pf01968, Pf06723		TRIAE_CS42_6AS_TGACv1_486608_AA1563150			6	0.888	-0.17	0.61244	0.975386	26.98	28.0533	103.5	96.5	23.01	8.18	3	3	132.9	99.3	85.5	92.6	102.4	87.3
High	Master Protein	A0A1D5Y336	tubulin beta chain [OS=Triticum aestivum]	0	157.048	65	22	437	3	1	448	50.2	4.83	1731	1411	357.73	323.62	22	22	20	21	cell organization and biogenesis	cytoplasm;cytoskeleton	catalytic activity;nucleotide binding;structural molecule activity	Pf00091, Pf03953		TRIAE_CS42_4DL_TGACv1_344438_AA1147180			0	0.672	-0.57	0.191302	0.832236	9.97	22.1491	123.9	76.1	10.66	17.74	3	3	132.8	119.2	107.3	73.2	70.9	96.7
High	Master Protein	A0A1D5ZVV6	Uncharacterized protein [OS=Triticum aestivum]	0	156.078	34	24	455	1	1	864	95.1	5.24	1294	1021	389.21	342.68	23	24	22	23			catalytic activity;nucleotide binding	Pf00009, Pf00679, Pf03764		TRIAE_CS42_5DL_TGACv1_435446_AA1450740			2	1.046	0.06	0.576866	0.966636	27.92	24.2102	90.5	109.5	28.08	12.45	3	3	89.5	75.7	128.7	87.4	110.4	108.2
High	Master Protein	A0A1D6CM16	Uncharacterized protein [OS=Triticum aestivum]	0	155.558	46	19	324	1	1	687	72.7	5.54	1036	1248	264.01	283.89	18	18	19	18	metabolic process	membrane	catalytic activity;nucleotide binding	Pf00004, Pf00158, Pf01057, Pf01078, Pf01434, Pf05496, Pf06068, Pf06480, Pf07724, Pf07728, Pf13191, Pf13207, Pf13401		TRIAE_CS42_7DL_TGACv1_602766_AA1967830			0
High	Master Protein	A0A1D6B311	S-adenosylmethionine synthase [OS=Triticum aestivum]	0	155.259	56	20	617	2	1	501	55	5.81	1607	1198	387.83	273.26	17	18	20	20	metabolic process		catalytic activity;metal ion binding;nucleotide binding	Pf00438, Pf02772, Pf02773		TRIAE_CS42_6DL_TGACv1_526382_AA1681340			23	0.886	-0.17	0.602686	0.970619	19.69	29.0114	109.1	90.9	8.15	4.6	3	3	116.3	99	111	94.7	86.6	92.5
High	Master Protein	A0A1D6AGT9	Phosphoglycerate kinase [OS=Triticum aestivum]	0	155.094	79	24	544	2	1	401	42.1	5.86	1347	1440	419.94	424.95	22	23	23	24	metabolic process		catalytic activity;nucleotide binding	Pf00162		TRIAE_CS42_6AS_TGACv1_486236_AA1558630			22	0.808	-0.31	0.316173	0.930938	16.67	29.3431	111.7	88.3	5.2	3.81	3	3	115.5	104.1	111.2	87.8	87.7	93.7
High	Master Protein	W5GA68	Pyrophosphate--fructose 6-phosphate 1-phosphotransferase subunit alpha [OS=Triticum aestivum]	0	154.759	75	29	334	29	1	616	67.1	7.18	860	755	236.38	250.16	26	26	29	29	metabolic process	cytoplasm	catalytic activity;metal ion binding;nucleotide binding	Pf00365		TRIAE_CS42_6AL_TGACv1_471645_AA1512290; TRIAE_CS42_6DL_TGACv1_527064_AA1697940			0	0.945	-0.08	0.853001	0.986776	31.34	27.2976	108.4	91.6	7.07	9.5	3	3	106.7	98.8	113.8	90.2	86.9	103.7
High	Master Protein	C0KTA6	fructose-bisphosphate aldolase [OS=Triticum aestivum]	0	154.131	79	21	505	3	1	388	42	6.16	1905	2383	363.34	464.96	20	20	20	20	metabolic process		catalytic activity	Pf00274	100415821		LOC100415821		0	1.278	0.35	0.127323	0.740569	67.51	24.8975	84.1	115.9	27.6	7.53	3	3	86.1	102.6	57.8	118.7	126.2	108.5
High	Master Protein	W5H440	Uncharacterized protein [OS=Triticum aestivum]	0	154.114	45	27	314	2	1	895	97.7	5.19	1022	893	245.62	210.06	26	27	23	23	regulation of biological process	proteasome	enzyme regulator activity	Pf01851		TRIAE_CS42_6DS_TGACv1_543333_AA1738580			28	0.723	-0.47	0.112361	0.715543	17.79	26.0771	125.1	74.9	14.36	12.84	3	3	130.7	99.4	126.8	74.1	76	93
High	Master Protein	W5DFE7	Uncharacterized protein [OS=Triticum aestivum]	0	154.08	65	27	364	2	1	608	65.9	7.47	1175	1063	305.09	268.15	27	26	26	24	metabolic process		catalytic activity	Pf00285, Pf00549					29	0.841	-0.25	0.427888	0.945676	23.26	27.4209	113.7	86.3	13.08	11.12	3	3	111.2	97.1	126.3	81.4	84.3	99.7
High	Master Protein	W5FGX7	Uncharacterized protein [OS=Triticum aestivum]	0	154	58	15	394	3	1	393	41.2	4.61	1056	1151	319.62	318.25	14	14	14	15			protein binding	Pf00023, Pf12796, Pf13606, Pf13637, Pf13857		TRIAE_CS42_5BL_TGACv1_406247_AA1342930			0	1.029	0.04	0.638735	0.9807	30.44	24.1564	115.1	84.9	28.81	6.99	3	3	127	122	71.4	89.9	100.7	89
High	Master Protein	W5AP59	Uncharacterized protein [OS=Triticum aestivum]	0	153.776	67	25	402	2	1	415	47.1	4.68	1020	883	312.34	304.99	24	24	23	23	metabolic process	endoplasmic reticulum	metal ion binding;protein binding	Pf00262		TRIAE_CS42_2AL_TGACv1_093357_AA0278350			0
High	Master Protein	A0A1D5ZRE6	Uncharacterized protein [OS=Triticum aestivum]	0	153.485	72	30	357	2	1	588	61.7	5.39	1140	1187	263.05	270.41	28	29	27	27	metabolic process	cytoplasm	nucleotide binding	Pf00118		TRIAE_CS42_5DL_TGACv1_434234_AA1432220			20	0.853	-0.23	0.470721	0.957414	22.89	26.4237	110.6	89.4	20.08	3.95	3	3	135.2	110.8	90.3	83.9	89.6	90.2
High	Master Protein	F8THZ6	Protein disulfide-isomerase [OS=Triticum aestivum]	0	153.254	57	29	405	4	1	515	56.6	5.05	940	1028	289.28	269.25	27	28	27	27	cellular homeostasis;regulation of biological process	endoplasmic reticulum	catalytic activity	Pf00085, Pf13098, Pf13848, Pf13899, Pf13905					2	0.683	-0.55	0.0596868	0.526898	19.49	26.379	112.4	87.6	14.32	13.49	3	3	129.2	108	97.8	84.2	101.7	79
High	Master Protein	A0A1D6S7C8	phosphoribulokinase [OS=Triticum aestivum]	0	152.538	66	22	408	22	1	404	45.1	6.05	648	654	251.57	369.27	19	18	22	19	metabolic process		catalytic activity;nucleotide binding	Pf00485		TRIAE_CS42_6AL_TGACv1_471165_AA1503920; TRIAE_CS42_6AL_TGACv1_474064_AA1533950			0	1.522	0.61	0.0205886	0.296955	27.94	28.9522	80.4	119.6	13.02	9.36	3	3	68.3	77.8	88.7	134.9	115.8	114.6
High	Master Protein	F8THZ7	Protein disulfide-isomerase [OS=Triticum aestivum]	0	152.466	58	28	434	1	1	512	56.4	5.07	1081	1008	335.53	284.78	27	28	26	26	cellular homeostasis;regulation of biological process	endoplasmic reticulum	catalytic activity	Pf00085, Pf13098, Pf13848, Pf13899, Pf13905					0	0.842	-0.25	0.626367	0.980056	15.51	23.6642	105.9	94.1	19.78	8.39	3	3	136.4	99.9	96.9	88.7	96.5	81.6
High	Master Protein	A0A1D6B557	Uncharacterized protein [OS=Triticum aestivum]	0	152.439	62	26	428	3	1	633	65.8	8.13	1930	1940	357.93	353.48	26	26	26	26	metabolic process	cytoplasm	catalytic activity;metal ion binding	Pf00883, Pf02789		TRIAE_CS42_6DL_TGACv1_526739_AA1691130			0	1.017	0.02	0.681798	0.983028	11.25	23.4554	100.8	99.2	7.58	1.01	3	3	102.7	90.3	103.7	102.1	101.1	100.1
High	Master Protein	A0A1D5U5J4	Uncharacterized protein [OS=Triticum aestivum]	0	152.305	31	34	294	4	1	1466	165	4.74	1031	920	241.21	191.55	33	34	26	26		membrane		Pf05622, Pf06160		TRIAE_CS42_2BL_TGACv1_132792_AA0439830			0	0.712	-0.49	0.283588	0.918961	36.17	21.1373	113.2	86.8	11.84	2.78	3	3	116.6	121.5	96.6	90.4	89.3	85.7
High	Master Protein	A0A1D5UT76	Glutamine synthetase [OS=Triticum aestivum]	0	152.171	57	20	769	1	1	433	47.3	6.05	1808	2295	536.18	773.12	19	19	20	20	metabolic process		catalytic activity;nucleotide binding	Pf00120, Pf03951		TRIAE_CS42_2DL_TGACv1_161369_AA0558280			23	1.343	0.43	0.0974305	0.669967	31.34	29.3355	84.9	115.1	16.29	8.37	3	3	76.1	81.7	102.9	123.5	105	110.8
High	Master Protein	A0A1D6A8Y2	Uncharacterized protein [OS=Triticum aestivum]	0	152.099	48	26	317	8	1	744	82	6.19	725	1019	207.82	255	26	22	25	24	metabolic process		catalytic activity;metal ion binding	Pf04551		TRIAE_CS42_6AL_TGACv1_472020_AA1516890			23	1.166	0.22	0.359307	0.943753	31.02	26.339	95.7	104.3	5.51	1.77	3	3	92.8	102.9	94.9	101.2	103.4	104.8
High	Master Protein	W5GCF7	Uncharacterized protein [OS=Triticum aestivum]	0	151.808	45	26	306	1	1	895	97.7	5.21	1021	883	240.61	203.49	25	26	23	23	regulation of biological process	proteasome	enzyme regulator activity	Pf01851		TRIAE_CS42_U_TGACv1_642173_AA2112700			0	0.757	-0.4	0.408752	0.943753	16.65	21.9779	113.8	86.2	37.6	14.87	3	3	173.8	89.9	100.7	68.2	76.3	91.2
High	Master Protein	W5H621	Uncharacterized protein [OS=Triticum aestivum]	0	150.973	61	26	355	1	1	608	65.9	7.28	1175	1063	298.11	265.88	26	25	25	23	metabolic process		catalytic activity	Pf00285, Pf00549		TRIAE_CS42_7AL_TGACv1_556574_AA1765940			0	0.871	-0.2	0.874792	0.989629	19.42	19.6117	106.9	93.1	31.31	9.75	3	3	83.6	98	149.3	85.4	83.9	99.7
High	Master Protein	A0A1D6BQY9	tubulin beta chain [OS=Triticum aestivum]	0	149.557	57	20	407	3	1	446	50.2	4.81	1807	1520	337.66	340.7	20	20	19	20	cell organization and biogenesis	cytoplasm;cytoskeleton	catalytic activity;nucleotide binding;structural molecule activity	Pf00091, Pf03953, Pf10644		TRIAE_CS42_7AL_TGACv1_558941_AA1797010; TRIAE_CS42_7DL_TGACv1_602671_AA1964800			3	0.968	-0.05	0.955471	0.994922	20.43	26.1525	104	96	13.66	11.67	3	3	116.9	88.7	105.2	84.8	97.1	107.3
High	Master Protein	A0A1D6ALD1	S-adenosylmethionine synthase [OS=Triticum aestivum]	0	149.324	65	19	592	3	1	430	47.1	5.52	1405	993	362.33	255.74	16	17	18	18	metabolic process		catalytic activity;metal ion binding;nucleotide binding	Pf00438, Pf02772, Pf02773		TRIAE_CS42_6BL_TGACv1_499577_AA1586520			0	0.902	-0.15	0.851078	0.986776	15.18	23.965	106.2	93.8	3.92	5.13	3	3	108.4	100.9	107.8	95.2	89.1	98.6
High	Master Protein	A0A1D5VEZ2	Uncharacterized protein [OS=Triticum aestivum]	0	149.256	45	31	338	3	1	1141	123.9	6.44	1076	1210	252.16	288.14	30	29	29	27	metabolic process		metal ion binding;nucleotide binding	Pf00289, Pf01071, Pf02142, Pf02222, Pf02786, Pf02787, Pf07478, Pf08442, Pf08443, Pf13535, Pf13549, Pf15632		TRIAE_CS42_3AL_TGACv1_196952_AA0663900			0	1.173	0.23	0.219263	0.874813	18.19	21.7866	92.2	107.8	3.5	5.48	3	3	91.5	95.7	89.3	106.9	114.2	102.5
High	Master Protein	A0A1D6AWP4	Uncharacterized protein [OS=Triticum aestivum]	0	149.025	70	24	427	2	1	363	40.1	6.58	1147	1222	303.66	321.97	22	22	24	24	metabolic process		catalytic activity	Pf00175, Pf00667, Pf00970		TRIAE_CS42_6BS_TGACv1_513535_AA1644420			26	1.427	0.51	0.0479501	0.496721	32.06	28.6473	85.4	114.6	11.46	12.42	3	3	73.1	91.8	86	131.3	115.4	102.5
High	Master Protein	A0A1D6S9G7	Uncharacterized protein [OS=Triticum aestivum]	0	148.971	71	27	417	3	1	592	61.4	8.12	1986	1806	349.5	341.24	27	26	25	25	metabolic process	cytoplasm	catalytic activity;metal ion binding	Pf00883, Pf02789		TRIAE_CS42_6BL_TGACv1_500019_AA1597340			1	1.098	0.14	0.398272	0.943753	16.69	22.3992	92.3	107.7	11.87	23.06	3	3	112.4	94.9	90	117.6	110.8	74.3
High	Master Protein	L0GED8	14-3-3 protein [OS=Triticum aestivum]	0	148.619	76	21	520	11	1	261	29.2	4.88	1712	1504	429.51	372.02	20	20	20	21	regulation of biological process		enzyme regulator activity;protein binding	Pf00244		TRIAE_CS42_4AL_TGACv1_289949_AA0979320; TRIAE_CS42_4DS_TGACv1_362253_AA1178260; TRIAE_CS42_4BS_TGACv1_330937_AA1109120			15	0.874	-0.19	0.554624	0.960787	26.39	29.6906	110.8	89.2	2.3	6.72	3	3	111.4	106.4	108.9	87.5	87.6	98.1
High	Master Protein	W5H4V7	Phosphoglycerate kinase [OS=Triticum aestivum]	0	148.273	79	23	530	1	1	401	42.1	5.69	1330	1418	400.99	410.71	22	23	22	23	metabolic process		catalytic activity;nucleotide binding	Pf00162		TRIAE_CS42_6DS_TGACv1_543391_AA1739400			0	0.686	-0.54	0.18095	0.815549	19.64	23.316	117.2	82.8	2.37	17.21	3	3	121.1	116	120.8	85.3	65.1	91.7
High	Master Protein	C7DPL0	Glutamine synthetase [OS=Triticum aestivum]	0	147.664	57	20	741	1	1	427	46.7	6.09	1776	2226	511	749.01	19	19	20	20	metabolic process;response to stimulus	extracellular;membrane;mitochondrion;ribosome	catalytic activity;nucleotide binding	Pf00120, Pf03951		TRIAE_CS42_2BL_TGACv1_129656_AA0391860			0	1.502	0.59	0.0247201	0.33543	35.18	25.9684	91.2	108.8	54.24	63.19	3	3	78	132.2	41.7	57.1	198.2	92.9
High	Master Protein	W5CLK1	Uncharacterized protein [OS=Triticum aestivum]	0	147.651	69	19	511	6	1	262	29.7	4.74	1417	1489	391.65	361.42	19	19	19	19			protein binding	Pf00244		TRIAE_CS42_3AS_TGACv1_210940_AA0681760			0	0.909	-0.14	0.698755	0.983028	31.59	26.7191	108.2	91.8	5.61	5.14	3	3	98.9	109.9	108.3	91.1	91.9	99.9
High	Master Protein	W5BHF2	Uncharacterized protein [OS=Triticum aestivum]	0	147.125	61	23	407	2	1	415	47.2	4.68	1070	881	309.03	300.44	22	22	23	23	metabolic process	endoplasmic reticulum	metal ion binding;protein binding	Pf00262		TRIAE_CS42_2BL_TGACv1_130251_AA0407250			0	0.945	-0.08	0.984552	0.998471	27.58	25.1962	99.5	100.5	15.92	16.36	3	3	119.8	91.9	91.9	86.4	117.1	92.9
High	Master Protein	A0A1D5VMJ0	S-adenosylmethionine synthase [OS=Triticum aestivum]	0	146.817	67	18	435	9	1	368	40.2	5.73	1268	1128	351.08	317.98	14	15	17	17	metabolic process		catalytic activity;metal ion binding;nucleotide binding	Pf00438, Pf02772, Pf02773		TRIAE_CS42_3AS_TGACv1_213440_AA0706960			0	0.915	-0.13	0.7229	0.983028	18.96	27.4168	109.6	90.4	1.1	3.2	3	3	109.8	107.9	110.1	90.6	87.9	93.7
High	Master Protein	A0A1D5X2X9	Uncharacterized protein [OS=Triticum aestivum]	0	146.643	68	29	345	1	1	586	61.4	5.39	1150	1203	254.87	260.95	27	28	26	26	metabolic process	cytoplasm	nucleotide binding	Pf00118		TRIAE_CS42_4AL_TGACv1_289223_AA0967550			0	0.939	-0.09	0.821233	0.985276	20.42	21.137	101.1	98.9	19.81	8.59	3	3	94.7	130	92.7	87.1	103	92.6
High	Master Protein	A0A1D6D5Q6	Uncharacterized protein [OS=Triticum aestivum]	0	145.731	71	24	330	19	1	524	55.5	4.89	1250	1165	278.65	245.56	23	24	21	22				Pf00092, Pf05762, Pf13519, Pf13768		TRIAE_CS42_7DS_TGACv1_624915_AA2063930			7	0.703	-0.51	0.0836205	0.624975	11.06	28.0452	121.4	78.6	10.86	9.64	3	3	129.5	121.3	104.3	75.8	90.5	78.5
High	Master Protein	A0A1D5VJ03	Uncharacterized protein [OS=Triticum aestivum]	0	145.573	35	25	323	4	1	1007	109.3	6.98	796	907	245.91	245.24	25	24	24	24	metabolic process			Pf00330, Pf00694		TRIAE_CS42_3AS_TGACv1_211361_AA0689150			18	1.114	0.16	0.49586	0.957414	26.72	26.6688	93.7	106.3	8.08	1.67	3	3	88.4	93	103.4	103.1	105.5	106.6
High	Master Protein	A0A1D5XJK8	Uncharacterized protein [OS=Triticum aestivum]	0	145.243	54	25	392	7	1	657	71.8	5.29	1416	1187	359.68	298.6	22	21	18	20			nucleotide binding	Pf00012, Pf06723		TRIAE_CS42_4BL_TGACv1_321069_AA1054650			0	0.597	-0.74	0.0697371	0.570213	7.14	22.5881	130.5	69.5	10.92	20.78	3	3	144.1	117.6	123	88.8	61	65.5
High	Master Protein	A0A1D6BRX9	Uncharacterized protein [OS=Triticum aestivum]	0	144.277	48	29	301	2	1	967	109.5	5.97	516	582	190.04	189.26	25	26	27	26	metabolic process		catalytic activity	Pf00311		TRIAE_CS42_7AL_TGACv1_560290_AA1802000			19	1.116	0.16	0.409505	0.943753	31.12	25.6783	89.2	110.8	15.59	7.5	3	3	78.9	85.7	106	119.2	103.7	106.5
High	Master Protein	A0A1D6AM62	Uncharacterized protein [OS=Triticum aestivum]	0	143.744	57	30	299	4	1	787	87.7	6.15	772	761	222.52	234.31	26	24	27	26	metabolic process		catalytic activity;metal ion binding	Pf01432		TRIAE_CS42_6BL_TGACv1_499736_AA1590480			25	0.994	-0.01	0.934192	0.992737	28.76	26.8425	100.2	99.8	3.49	2.4	3	3	99.3	98.9	105.2	101.2	98.9	96.4
High	Master Protein	A0A1D5T799	glyceraldehyde-3-phosphate dehydrogenase [OS=Triticum aestivum]	0	143.421	68	21	890	1	1	401	42.7	7.4	1847	2140	655.71	843.61	17	17	21	21	metabolic process		catalytic activity;nucleotide binding	Pf00044, Pf02800		TRIAE_CS42_2AL_TGACv1_093283_AA0276660			16	1.438	0.52	0.0438958	0.475824	30.58	29.4418	82.9	117.1	6.21	6.06	3	3	76.2	85.6	84.5	124.2	119.4	110.1
High	Master Protein	Q5EWZ1	Actin [OS=Triticum aestivum]	0	143.254	76	20	435	3	1	377	41.7	5.4	1187	1118	371.99	318.28	19	18	18	17			nucleotide binding	Pf00022		TRIAE_CS42_1BS_TGACv1_049534_AA0156080; TRIAE_CS42_1AS_TGACv1_020044_AA0074210; TRIAE_CS42_1DS_TGACv1_081187_AA0258490			3	0.917	-0.12	0.883931	0.990309	24.96	24.9375	108.6	91.4	18.69	5.68	3	3	133	91.6	109	91.8	83	91.7
High	Master Protein	A0A1D5TTT2	glyceraldehyde-3-phosphate dehydrogenase [OS=Triticum aestivum]	0	143.028	68	21	880	1	1	401	42.7	7.72	1811	2043	647.34	835.17	17	17	21	21	metabolic process		catalytic activity;nucleotide binding	Pf00044, Pf02800		TRIAE_CS42_2BL_TGACv1_129410_AA0382570			0	1.457	0.54	0.0368775	0.424655	14.51	26.5626	81.4	118.6	11.92	6.13	3	3	69.2	84.7	86.7	123.4	124.6	111.3
High	Master Protein	A0A1D6BUP3	Uncharacterized protein [OS=Triticum aestivum]	0	142.598	39	20	327	3	1	620	68.9	5.43	1080	993	267.41	263.5	19	19	18	18	metabolic process		catalytic activity	Pf00251, Pf08244		TRIAE_CS42_7AS_TGACv1_569613_AA1820410			0	0.825	-0.28	0.686593	0.983028	13.8	22.2061	111.6	88.4	2.69	16.96	3	3	105.9	109.1	111.7	108.3	78.5	86.5
High	Master Protein	W5DZS4	Uncharacterized protein [OS=Triticum aestivum]	0	141.571	74	17	376	16	1	348	38.9	7.56	1454	1451	310.13	313.81	17	17	17	17	metabolic process		catalytic activity	Pf01073, Pf01370, Pf02719, Pf04321, Pf07993		TRIAE_CS42_4DL_TGACv1_345738_AA1154310; TRIAE_CS42_4AS_TGACv1_308062_AA1025610; TRIAE_CS42_4BL_TGACv1_321334_AA1059180			1	0.84	-0.25	0.422674	0.943753	19.43	28.2574	111.7	88.3	10.63	5.95	3	3	109.7	99.3	122.8	85.9	86.8	95.5
High	Master Protein	W5FAY5	Actin [OS=Triticum aestivum]	0	141.394	73	19	382	2	1	377	41.6	5.49	937	1165	282.77	316.82	18	17	19	18			nucleotide binding	Pf00022		TRIAE_CS42_5DL_TGACv1_437323_AA1465890; TRIAE_CS42_5BL_TGACv1_404202_AA1289910			5	0.837	-0.26	0.567076	0.962	19.33	24.6156	108.7	91.3	8.66	6.61	3	3	118.7	106.4	100.2	98.4	86.9	89.3
High	Master Protein	W5H6B4	Uncharacterized protein [OS=Triticum aestivum]	0	141.307	55	27	250	2	1	673	71.8	5.82	608	720	185.16	214.09	23	23	24	24	metabolic process;response to stimulus	membrane	catalytic activity;metal ion binding;nucleotide binding	Pf00004, Pf01057, Pf01078, Pf01434, Pf01695, Pf05496, Pf06068, Pf06480, Pf07724, Pf07726, Pf07728, Pf13191, Pf13207, Pf13401		TRIAE_CS42_7AL_TGACv1_557079_AA1776230			28	1.333	0.41	0.105512	0.697934	36.86	26.705	82.6	117.4	10.57	14.17	3	3	81.8	94.1	76.7	131.9	116.3	99.1
High	Master Protein	A0A1D6C446	Uncharacterized protein [OS=Triticum aestivum]	0	140.983	44	28	295	1	1	967	109.7	6.01	512	582	183.21	190.41	23	24	27	25	metabolic process		catalytic activity	Pf00311		TRIAE_CS42_7BL_TGACv1_577218_AA1869310			0
High	Master Protein	A0A1D5XF28	Uncharacterized protein [OS=Triticum aestivum]	0	140.22	80	26	303	1	1	418	46.1	4.82	1039	854	224.36	206.69	23	23	25	25			nucleotide binding	Pf00004, Pf00910, Pf01057, Pf01078, Pf05496, Pf06068, Pf07724, Pf07728, Pf13207, Pf13401		TRIAE_CS42_4AS_TGACv1_309604_AA1031080			0	0.63	-0.67	0.308193	0.927837	22.91	18.7159	120.4	79.6	42.41	49.24	3	2	204.5	87.7	127.7		121.3	58.7
High	Master Protein	A0A1D6CBM2	Uncharacterized protein [OS=Triticum aestivum]	0	140.141	55	26	251	1	1	673	71.8	5.94	665	693	191.98	210.9	24	23	23	23	metabolic process	membrane	catalytic activity;nucleotide binding	Pf00004, Pf01057, Pf01078, Pf01434, Pf01695, Pf05496, Pf06068, Pf06480, Pf07724, Pf07726, Pf07728, Pf13191, Pf13207, Pf13401		TRIAE_CS42_7BL_TGACv1_579573_AA1908570			0
High	Master Protein	A3KLL4	malate dehydrogenase [OS=Triticum aestivum]	0	139.947	68	19	441	6	1	333	35.5	6.09	1480	1193	364.39	316.04	18	17	19	18	metabolic process		catalytic activity	Pf00056, Pf02866, Pf13460		TRIAE_CS42_1AL_TGACv1_000087_AA0002830; TRIAE_CS42_1BL_TGACv1_030950_AA0104200			14	0.887	-0.17	0.605796	0.972092	20.92	29.5534	106	94	0.51	1.43	3	3	106.1	107.1	106.4	91.9	94.3	94.3
High	Master Protein	A0A1D5Z536	Uncharacterized protein [OS=Triticum aestivum]	0	139.883	68	20	385	2	1	420	46.2	5.43	1166	996	342.59	289.95	19	18	20	19			nucleotide binding	Pf00022		TRIAE_CS42_5BL_TGACv1_405404_AA1326580			19	0.734	-0.45	0.131357	0.751964	21.46	29.0921	111.9	88.1	9.38	5.12	3	3	121.7	110.3	100.9	94.3	86	86.9
High	Master Protein	A0A1D6S744	Uncharacterized protein [OS=Triticum aestivum]	0	139.756	51	28	282	2	1	839	93.7	6.67	699	707	205.67	228.58	24	22	25	25	metabolic process		catalytic activity;metal ion binding	Pf01432		TRIAE_CS42_6AL_TGACv1_471103_AA1502810			0	1	0	0.70251	0.983028	21.95	22.7671	97	103	15.92	8.68	3	3	117.4	97.1	85.9	103.1	90	106.4
High	Master Protein	A0A1D5TV48	Uncharacterized protein [OS=Triticum aestivum]	0	138.98	70	20	326	15	1	376	41	8.05	954	1034	217.11	260.11	18	18	17	17	metabolic process		catalytic activity;nucleotide binding	Pf00478, Pf01070, Pf01645, Pf03060		TRIAE_CS42_2BL_TGACv1_129567_AA0388910			6	1.33	0.41	0.108001	0.705832	31.14	28.5976	87.2	112.8	14.59	8.65	3	3	76.9	85.7	102.3	121.7	102.5	110.8
High	Master Protein	A0A1D5SLG9	glucose-6-phosphate isomerase [OS=Triticum aestivum]	0	138.825	68	22	278	1	1	567	62.2	7.68	556	686	204.06	229.65	22	22	18	18	metabolic process		catalytic activity	Pf00342		TRIAE_CS42_1BS_TGACv1_050050_AA0166630			24	1.048	0.07	0.718967	0.983028	23.97	26.7924	97.9	102.1	12.23	0.48	3	3	89.5	96.2	113.1	100.4	99.9	100.8
High	Master Protein	A0A1D5X2U0	Uncharacterized protein [OS=Triticum aestivum]	0	138.586	63	28	293	15	1	576	61.1	5.64	1084	1073	221.9	235.05	24	23	26	25	metabolic process	cytoplasm	nucleotide binding	Pf00118		TRIAE_CS42_4AL_TGACv1_289198_AA0967190			14	1.055	0.08	0.692892	0.983028	30.08	27.1128	106.5	93.5	25.64	6.78	3	3	117.7	112.4	70.8	98.8	106.9	93.5
High	Master Protein	A0A1D5YGG9	Uncharacterized protein [OS=Triticum aestivum]	0	138.538	54	20	371	1	1	404	44.2	10.67	1050	1125	252.8	267.82	19	19	19	19	metabolic process	ribosome	structural molecule activity	Pf00573, Pf14374		TRIAE_CS42_5AL_TGACv1_374887_AA1211010			24	1.017	0.02	0.838973	0.986776	27.03	29.2588	102.2	97.8	2.32	7.36	3	3	101.2	104.7	100.2	91.4	105.7	96.8
High	Master Protein	A0A1D6B1Z0	Uncharacterized protein [OS=Triticum aestivum]	0	138.095	71	19	451	4	1	351	37.8	6.55	809	1205	281.53	348.65	18	17	19	18	metabolic process		catalytic activity	Pf01379, Pf03900		TRIAE_CS42_6BS_TGACv1_516069_AA1673660			20	1.204	0.27	0.277635	0.91739	29.65	28.463	97.1	102.9	9.54	7.2	3	3	99.5	101.2	84.7	105.5	112	97
High	Master Protein	A0A1D6BX83	Uncharacterized protein [OS=Triticum aestivum]	0	137.614	66	22	300	17	1	524	55.3	4.93	1127	1043	249.89	242.09	20	21	20	21				Pf00092, Pf05762, Pf13519, Pf13768		TRIAE_CS42_7AS_TGACv1_570219_AA1832450			0	0.746	-0.42	0.155248	0.792321	11.59	26.9576	117.8	82.2	7.35	1.84	3	3	106.9	123.6	118.5	82.8	85.4	82.7
High	Master Protein	A0A1D5SMN4	Uncharacterized protein [OS=Triticum aestivum]	0	137.458	44	29	276	3	1	832	92.2	5.2	1287	985	238.45	188.33	26	26	21	21			nucleotide binding	Pf00012, Pf02801		TRIAE_CS42_1BS_TGACv1_050491_AA0172780			8	0.76	-0.4	0.317833	0.930938	16.82	23.8596	109.1	90.9	23.62	13.51	3	3	135.6	114.8	83.4	74.9	95.7	95.6
High	Master Protein	F8WTQ7	Delta-aminolevulinic acid dehydratase [OS=Triticum aestivum]	0	137.433	76	22	364	1	1	428	46.2	5.83	1432	1605	265.72	296.24	18	18	21	21	metabolic process		catalytic activity;metal ion binding	Pf00490	100859960	TRIAE_CS42_7DL_TGACv1_605317_AA2006040	TaALAD1d		25	1.175	0.23	0.336962	0.940733	24.32	27.7973	93.7	106.3	8.02	2.93	3	3	89.1	103.5	92	108.5	104.5	102.4
High	Master Protein	A0A1D5Z4H3	Lipoxygenase [OS=Triticum aestivum]	0	137.393	43	19	320	1	1	695	77.1	10.04	1002	779	282.95	260.46	18	18	17	17	metabolic process		catalytic activity;metal ion binding	Pf00305		TRIAE_CS42_5BL_TGACv1_405274_AA1323740			0	0.692	-0.53	0.226039	0.880765	8.66	22.4996	118.2	81.8	24.17	7.2	3	3	155.3	100.5	109.3	74.6	75.6	84.8
High	Master Protein	A0A1D5WMF2	fructose-bisphosphate aldolase [OS=Triticum aestivum]	0	137.191	70	21	335	1	1	389	42	6.9	1340	1108	296.74	285.64	21	20	19	20	metabolic process		catalytic activity	Pf00274		TRIAE_CS42_3DL_TGACv1_251713_AA0884060			20	0.756	-0.4	0.177142	0.811878	16.76	29.2066	119	81	12.57	13.27	3	3	117.2	99	127.4	79.7	78.1	98.5
High	Master Protein	A0A1D6AEP1	Uncharacterized protein [OS=Triticum aestivum]	0	137.19	66	23	391	1	1	363	40.2	6.58	1074	1191	273.9	303.93	21	21	23	23	metabolic process		catalytic activity	Pf00175, Pf00667, Pf00970		TRIAE_CS42_6AS_TGACv1_485494_AA1546370			0	1.262	0.34	0.162759	0.793219	19.85	20.4872	88.4	111.6	5.82	18.2	3	3	90.8	92.2	82.7	114.6	129.9	89.7
High	Master Protein	A0A1D6SAZ0	Uncharacterized protein [OS=Triticum aestivum]	0	136.965	34	32	231	2	1	1362	148.9	6.74	947	670	191.53	140.48	30	30	22	23	metabolic process		catalytic activity	Pf00082, Pf07362, Pf09710, Pf12580, Pf14265		TRIAE_CS42_6DL_TGACv1_526629_AA1688520			25	0.877	-0.19	0.566899	0.962	19.02	25.931	109.3	90.7	8.13	7.03	3	3	108.6	97.9	115.1	90.1	88	100.2
High	Master Protein	W5EJK0	Uncharacterized protein [OS=Triticum aestivum]	0	136.954	78	17	396	3	1	250	27.5	6.35	1342	1194	292.53	284.95	14	15	15	17	metabolic process;response to stimulus		antioxidant activity;catalytic activity	Pf00141		TRIAE_CS42_4DL_TGACv1_342793_AA1122380			0	0.859	-0.22	0.494625	0.957414	22.2	25.9709	108.6	91.4	11.47	1.9	3	3	119.9	95.1	108.5	91	94.2	91.3
High	Master Protein	A0A1D6S950	Uncharacterized protein [OS=Triticum aestivum]	0	136.779	35	31	240	3	1	1361	148.8	6.71	857	598	197.66	146.04	29	29	23	24	metabolic process		catalytic activity	Pf00082, Pf07362, Pf09710, Pf12580, Pf14265		TRIAE_CS42_6BL_TGACv1_499891_AA1594120			0	0.979	-0.03	0.692559	0.983028	38.94	21.3661	116.3	83.7	19.12	25.95	3	3	107.2	89.7	131.4	77.1	76.9	117.7
High	Master Protein	W5EDL3	fructose-bisphosphate aldolase [OS=Triticum aestivum]	0	136.322	81	23	454	3	1	388	41.8	7.21	1713	2019	305.16	403.97	22	22	22	22	metabolic process		catalytic activity	Pf00274		TRIAE_CS42_4BS_TGACv1_328216_AA1084770			12	1.27	0.34	0.171841	0.803876	27.7	29.8415	89.2	110.8	12.73	2.79	3	3	75	89.6	96.7	116.5	110.8	111.3
High	Master Protein	W5FL09	fructose-bisphosphate aldolase [OS=Triticum aestivum]	0	136.321	79	24	449	16	1	385	41.6	6.4	1284	1528	305.32	376.85	22	23	23	23	metabolic process		catalytic activity	Pf00274		TRIAE_CS42_5BS_TGACv1_423387_AA1375670			9	1.346	0.43	0.0951099	0.667142	32.54	30.6418	89.3	110.7	14.97	6.81	3	3	71.9	91.6	96.3	121.1	105.7	113.5
High	Master Protein	W5CXB0	Uncharacterized protein [OS=Triticum aestivum]	0	136.255	49	24	342	15	1	684	73.3	5.87	1060	1494	285.41	300.25	23	23	23	23	cell organization and biogenesis;metabolic process		nucleotide binding;protein binding	Pf00012, Pf06723					10	0.983	-0.02	0.981458	0.998277	26.2	26.8685	105	95	10.06	3.17	3	3	107.6	108.9	90.5	97.4	100.9	94.7
High	Master Protein	F8WTQ6	Delta-aminolevulinic acid dehydratase [OS=Triticum aestivum]	0	135.427	73	21	360	1	1	428	46.2	5.83	1316	1496	253.17	294.01	17	17	20	20	metabolic process		catalytic activity;metal ion binding	Pf00490		TRIAE_CS42_7BL_TGACv1_577223_AA1869550			0	1.16	0.21	0.280922	0.918961	7.97	22.4585	92.6	107.4	8.51	1.05	3	3	91.6	102.5	86.9	105.3	106.3	107.5
High	Master Protein	A0A1D6BP32	Mg-protoporphyrin IX chelatase [OS=Triticum aestivum]	0	135.193	62	20	340	3	1	421	45.4	5.59	930	949	256.47	238.23	20	19	20	20	metabolic process		catalytic activity;nucleotide binding			TRIAE_CS42_7AL_TGACv1_557844_AA1786920			22	1.086	0.12	0.585886	0.970069	22.68	28.2485	98.2	101.8	2.79	3.9	3	3	99.5	100.6	95.4	104.4	97	103.1
High	Master Protein	A0A1D5Y5E0	Uncharacterized protein [OS=Triticum aestivum]	0	134.824	48	31	276	31	1	995	109.2	7.25	955	766	239.87	203.68	29	28	21	21	regulation of biological process			Pf00565, Pf00567		TRIAE_CS42_4DS_TGACv1_361093_AA1160730			0	0.815	-0.29	0.338517	0.940733	15.96	26.1134	109.9	90.1	11.21	7.06	3	3	122.8	98.5	107.6	85.4	88.2	97.6
High	Master Protein	A0A096UL77	Uncharacterized protein [OS=Triticum aestivum]	0	134.565	73	20	468	4	1	263	29.9	4.74	1474	1465	371.41	335.76	20	20	20	20			protein binding	Pf00244		TRIAE_CS42_2AL_TGACv1_097132_AA0323110; TRIAE_CS42_2DL_TGACv1_159212_AA0534510			8	0.87	-0.2	0.539665	0.960041	28.83	26.6136	105.1	94.9	0.98	5.33	3	3	105.3	107.4	106.6	87.8	96.3	96.6
High	Master Protein	W5C4N4	Xylose isomerase [OS=Triticum aestivum]	0	134.508	73	23	274	2	1	480	53.6	5.57	796	602	178.09	207.09	22	21	21	21	metabolic process		catalytic activity;metal ion binding	Pf01261		TRIAE_CS42_2DS_TGACv1_177668_AA0582190			0	1.083	0.12	0.345191	0.942528	18.04	21.4692	98.7	101.3	55.24	10.91	3	3	110	109.4	30.1	131.2	112.3	106.9
High	Master Protein	A0A067YNJ5	Actin [OS=Triticum aestivum]	0	134.193	69	18	379	2	1	377	41.6	5.49	1086	1008	314.48	297.63	18	18	18	18			nucleotide binding	Pf00022					0	0.881	-0.18	0.899706	0.990309	19.82	22.644	109.9	90.1	6.37	12.05	3	3	110.6	102.5	116.5	100.7	79	90.7
High	Master Protein	A0A1D5W8C8	isocitrate dehydrogenase [NADP] [OS=Triticum aestivum]	0	134.158	48	21	346	2	1	451	50.6	7.94	1301	1437	258.31	277.2	21	21	19	19	metabolic process		catalytic activity;metal ion binding;nucleotide binding	Pf00180		TRIAE_CS42_3B_TGACv1_225653_AA0810720			19	0.913	-0.13	0.71469	0.983028	20.98	28.2058	103.9	96.1	13.17	7.87	3	3	95.3	99.4	121.1	103.2	89.2	91.9
High	Master Protein	A0A1D5S2F5	Uncharacterized protein [OS=Triticum aestivum]	0	133.982	31	27	242	4	1	1437	153.1	4.53	936	954	198.23	184.8	24	24	23	22			catalytic activity;nucleotide binding	Pf00735, Pf01926, Pf03193, Pf04548, Pf11886		TRIAE_CS42_1AS_TGACv1_019467_AA0067010			20	0.879	-0.19	0.664316	0.983028	33.13	25.5593	104.6	95.4	14.9	18.82	3	3	110.3	120.3	89.2	73.4	100.5	106.3
High	Master Protein	F8WTQ5	Delta-aminolevulinic acid dehydratase [OS=Triticum aestivum]	0	133.872	72	21	345	1	1	428	46.2	6.01	1335	1509	242.01	287.9	17	17	20	20	metabolic process		catalytic activity;metal ion binding	Pf00490		TRIAE_CS42_7AL_TGACv1_557637_AA1784370			1	1.314	0.39	0.107162	0.701993	36.71	22.6325	80.4	119.6	31.41	1.89	3	3	65.6	76.8	117.3	115.1	114.2	111
High	Master Protein	W5E923	tubulin beta chain [OS=Triticum aestivum]	0	133.57	52	19	373	1	1	445	49.7	4.83	1228	1156	273.37	284.5	18	18	18	19	cell organization and biogenesis	cytoplasm;cytoskeleton	catalytic activity;nucleotide binding;structural molecule activity	Pf00091, Pf03953, Pf10644		TRIAE_CS42_4BS_TGACv1_328921_AA1095710			0
High	Master Protein	W5B0Q9	Xylose isomerase [OS=Triticum aestivum]	0	133.534	73	23	274	2	1	480	53.6	5.57	703	638	173.03	208.67	23	22	21	21	metabolic process		catalytic activity;metal ion binding	Pf01261		TRIAE_CS42_2AS_TGACv1_113092_AA0351090			23	1	0	0.910288	0.991839	28.72	26.6398	101.3	98.7	5.62	9.29	3	3	106.7	101	95.3	108.5	98.3	90.2
High	Master Protein	W5FIQ5	Uncharacterized protein [OS=Triticum aestivum]	0	133.396	64	18	342	13	1	370	40.3	8.98	1175	1376	243.4	294.7	17	18	16	17	metabolic process		catalytic activity;nucleotide binding	Pf00478, Pf00977, Pf01070, Pf01645, Pf03060		TRIAE_CS42_5BL_TGACv1_408001_AA1360910			0	1.242	0.31	0.212111	0.86604	27.38	28.2132	87.7	112.3	17.56	8.31	3	3	77.4	87.5	108.8	115.7	98.6	112.1
High	Master Protein	A0A1D5X8S8	tubulin beta chain [OS=Triticum aestivum]	0	133.15	52	19	373	1	1	445	49.7	4.83	1235	1141	277.45	280.6	19	19	17	18	cell organization and biogenesis	cytoplasm;cytoskeleton	catalytic activity;nucleotide binding;structural molecule activity	Pf00091, Pf03953, Pf10644		TRIAE_CS42_4AL_TGACv1_291622_AA0995640			4	0.857	-0.22	0.787486	0.98358	16.29	22.3104	109.1	90.9	1.25	17.87	3	3	105.7	105.9	108.1	80	88.2	112.1
High	Master Protein	W5BP49	Xylose isomerase [OS=Triticum aestivum]	0	132.962	73	23	280	1	1	480	53.6	5.57	779	635	179.47	212.51	23	22	21	21	metabolic process		catalytic activity;metal ion binding	Pf01261		TRIAE_CS42_2BS_TGACv1_147123_AA0478380			1	0.875	-0.19	0.870837	0.989292	18.16	22.4783	106.9	93.1	18.98	2.75	3	3	128.1	107.6	87.2	94	89.4	93.6
High	Master Protein	A4K4Z3	tubulin alpha chain [OS=Triticum aestivum]	0	132.782	60	20	313	3	1	450	49.6	5.1	792	873	252.55	213.54	18	18	17	18	cell organization and biogenesis		catalytic activity;nucleotide binding;structural molecule activity	Pf00091, Pf03953	100049039	TRIAE_CS42_2AS_TGACv1_114823_AA0369500; TRIAE_CS42_2DS_TGACv1_177956_AA0588140; TRIAE_CS42_2BS_TGACv1_146625_AA0469600	TUBA-1D		2	0.897	-0.16	0.821911	0.985276	23.26	24.7338	103.8	96.2	13.5	10.25	3	3	91	100.7	118.5	88.8	93.3	107.7
High	Master Protein	A0A1D5S2P8	glucose-6-phosphate isomerase [OS=Triticum aestivum]	0	132.475	60	21	270	2	1	567	62.3	7.43	539	654	195.9	226.92	21	21	18	18	metabolic process		catalytic activity	Pf00342		TRIAE_CS42_1AS_TGACv1_019549_AA0068020			0	0.9	-0.15	0.954201	0.994922	19.63	22.2961	134.4	65.6	47.99	12.81	3	3	174.2	145.1	58.2	70.9	84.9	66.7
High	Master Protein	W5GZ18	Uncharacterized protein [OS=Triticum aestivum]	0	132.178	68	18	308	1	1	344	37.2	5.1	1071	882	255.41	251.77	17	18	17	17	metabolic process		catalytic activity	Pf00294, Pf05693		TRIAE_CS42_6DL_TGACv1_526952_AA1695860			2	0.913	-0.13	0.815375	0.985276	9.32	25.5549	105.7	94.3	3.48	3.6	3	3	108.5	101.4	106.8	90.7	97.3	95.2
High	Master Protein	A0A1D5VDI3	isocitrate dehydrogenase [NADP] [OS=Triticum aestivum]	0	132.117	50	21	345	2	1	430	48.2	6.93	1087	1234	244.66	267.05	21	21	19	19	metabolic process		catalytic activity;metal ion binding;nucleotide binding	Pf00180		TRIAE_CS42_3AL_TGACv1_196192_AA0658040			0	0.91	-0.14	0.9073	0.990309	16.32	23.8966	101.3	98.7	17.93	3.17	3	3	97.8	90.7	126.2	95.3	92	98
High	Master Protein	A0A096USW1	Uncharacterized protein [OS=Triticum aestivum]	0	131.956	67	20	312	20	1	377	41.6	8.7	564	844	213.22	253.81	18	18	20	20	metabolic process		catalytic activity	Pf01073, Pf01370, Pf04321, Pf13460		TRIAE_CS42_5BS_TGACv1_423535_AA1378810			0	1.527	0.61	0.019756	0.291054	34.92	28.2453	77.8	122.2	21.59	3.32	3	3	65.9	75.4	99.6	124.1	118.6	116.3
High	Master Protein	A0A1D5ZSR8	Uncharacterized protein [OS=Triticum aestivum]	0	131.948	52	19	344	1	1	404	44.2	10.61	959	988	236.2	253.45	18	18	18	18	metabolic process	ribosome	structural molecule activity	Pf00573, Pf14374		TRIAE_CS42_5DL_TGACv1_434538_AA1437720			0	1.136	0.18	0.39423	0.943753	21.32	20.3261	93.6	106.4	35.34	10.55	3	3	75.5	86.4	142.4	98.1	88.4	109.2
High	Master Protein	A0A1D5U9J7	Uncharacterized protein [OS=Triticum aestivum]	0	131.852	92	17	1269	3	1	254	27.4	5.35	1691	1475	845.4	727.47	16	16	16	16	metabolic process;response to stimulus		antioxidant activity;catalytic activity	Pf00141		TRIAE_CS42_2BS_TGACv1_146384_AA0464000			5	0.988	-0.02	0.961772	0.995121	29.7	28.8957	95.1	104.9	18.3	2.89	3	3	117.6	82.4	94	98.6	103.7	103.8
High	Master Protein	A0A1D6B0C9	aminopeptidase [OS=Triticum aestivum]	0	131.391	50	28	294	3	1	877	98.1	5.58	928	732	227.93	197.66	27	28	21	21	metabolic process		catalytic activity;metal ion binding	Pf01433, Pf11838, Pf13485		TRIAE_CS42_6BS_TGACv1_514881_AA1665340			23	0.775	-0.37	0.221635	0.876905	17.66	26.1795	109.6	90.4	9.69	8.11	3	3	109.5	102.9	124.2	90.3	79.8	93.3
High	Master Protein	A0A1D5XY50	glyceraldehyde-3-phosphate dehydrogenase [OS=Triticum aestivum]	0	131.155	64	24	557	1	1	444	46.8	6.62	1505	2301	359.72	529.88	21	22	23	23	metabolic process		catalytic activity;nucleotide binding	Pf00044, Pf02672, Pf02800		TRIAE_CS42_4DL_TGACv1_342886_AA1124730			0	2.004	1	0.000904969	0.0263906	20.36	20.5302	73.2	126.8	31.58	35.44	3	3	42.3	78.6	78.8	84.7	179.2	136.3
High	Master Protein	A0A1D5YL67	glyceraldehyde-3-phosphate dehydrogenase [OS=Triticum aestivum]	0	130.856	64	24	548	2	1	444	46.9	6.47	1498	2293	355.44	527.29	21	22	23	22	metabolic process		catalytic activity;nucleotide binding	Pf00044, Pf02672, Pf02800		TRIAE_CS42_5AL_TGACv1_376050_AA1231400			0	1.585	0.66	0.00827101	0.155828	6.27	24.8343	76.7	123.3	3.28	3.65	3	3	73.3	77.5	77.8	124.7	127.8	118.9
High	Master Protein	A0A1D5SUT5	Uncharacterized protein [OS=Triticum aestivum]	0	130.825	51	19	348	1	1	397	43.4	10.64	976	997	243.57	253.61	18	18	18	18	metabolic process	ribosome	structural molecule activity	Pf00573, Pf14374		TRIAE_CS42_1DL_TGACv1_062097_AA0208700			0	0.673	-0.57	0.232308	0.884424	10.14	20.4892	126.7	73.3	16.56	22.59	3	3	131.9	130.3	96.8	75.4	65.1	100.4
High	Master Protein	A0A1D5XJY0	glyceraldehyde-3-phosphate dehydrogenase [OS=Triticum aestivum]	0	130.544	64	24	556	1	1	444	46.9	6.47	1500	2301	363.46	530.45	21	22	23	23	metabolic process		catalytic activity;nucleotide binding	Pf00044, Pf02672, Pf02800		TRIAE_CS42_4BL_TGACv1_321146_AA1056160			23	1.513	0.6	0.0224269	0.316821	26.15	30.3059	85.9	114.1	15.33	7.75	3	3	66.7	87	89.1	129.5	112.1	115.5
High	Master Protein	Q9FRZ5	Ribulose bisphosphate carboxylase small chain [OS=Triticum aestivum]	0	130.434	78	15	534	7	1	175	19.5	8.88	1606	1848	405.91	401.65	14	14	14	14	metabolic process		catalytic activity	Pf00101, Pf12338					10	1.18	0.24	0.326391	0.93839	33.63	32.4476	88.3	111.7	14.22	6.32	3	3	84.7	86.3	108.4	109.1	99.3	112.2
High	Master Protein	W5H5K0	Uncharacterized protein [OS=Triticum aestivum]	0	130.327	65	17	430	2	1	351	37.7	6.79	762	1018	271.99	325.21	16	15	17	16	metabolic process		catalytic activity	Pf01379, Pf03900		TRIAE_CS42_6DS_TGACv1_543797_AA1744260			0	1.014	0.02	0.699766	0.983028	23.05	24.8351	105.5	94.5	15.84	12.65	3	3	104.7	112	81.8	93.7	115.2	92.7
High	Master Protein	A0A1D6CH77	Pyrophosphate--fructose 6-phosphate 1-phosphotransferase subunit beta [OS=Triticum aestivum]	0	129.971	53	23	288	23	1	663	72.1	7.03	983	1066	241.1	238.8	20	20	22	22	metabolic process	cytoplasm	catalytic activity;metal ion binding;nucleotide binding	Pf00365		TRIAE_CS42_7BS_TGACv1_592649_AA1942290			0	0.885	-0.18	0.596352	0.970428	24.19	27.1212	107.3	92.7	9.82	8.6	3	3	103.3	99.3	119.2	87	89.3	101.8
High	Master Protein	A0A1D6AL13	Uncharacterized protein [OS=Triticum aestivum]	0	129.358	53	23	284	2	1	580	64.9	6.13	884	743	246.01	224.93	22	22	22	21			protein binding	Pf00515, Pf13414, Pf13424, Pf13432		TRIAE_CS42_6BL_TGACv1_499508_AA1584590			24	0.877	-0.19	0.56606	0.962	24.39	27.2052	114.8	85.2	19.51	3.82	3	3	137.1	113.6	92.5	83.2	84.2	89.3
High	Master Protein	A0A1D6AK65	Uncharacterized protein [OS=Triticum aestivum]	0	128.273	64	17	308	1	1	345	37.2	5.16	1112	947	257.34	261.19	16	17	16	16	metabolic process		catalytic activity	Pf00294, Pf05693		TRIAE_CS42_6BL_TGACv1_499360_AA1579440			0	0.995	-0.01	0.664686	0.983028	6.97	22.2599	99.6	100.4	3.54	12.84	3	3	106.4	102.5	99.1	83	103.3	105.8
High	Master Protein	I0JTT9	glutamate decarboxylase [OS=Triticum aestivum]	0	128.256	62	20	277	8	1	487	53.8	5.58	1028	1188	213.01	220.11	18	19	18	18	metabolic process		catalytic activity	Pf00282		TRIAE_CS42_3DS_TGACv1_272233_AA0917470			15	1.042	0.06	0.740624	0.983136	27.96	27.1967	99.8	100.2	12.15	5.54	3	3	88.3	99.6	112.6	105.2	100.1	94.2
High	Master Protein	A0A1D5WIS4	fructose-bisphosphate aldolase [OS=Triticum aestivum]	0	127.71	75	21	315	2	1	358	38.8	7.21	1196	1038	266.9	272.16	21	20	19	20	metabolic process		catalytic activity	Pf00274		TRIAE_CS42_3DL_TGACv1_250475_AA0868810			1	0.767	-0.38	0.200645	0.848426	15.96	26.7361	120.4	79.6	9.87	15.71	3	3	120.2	103.3	125.2	73.4	79.4	98.6
High	Master Protein	A0A1D6B6N2	Uncharacterized protein [OS=Triticum aestivum]	0	127.273	48	25	282	7	1	744	82.1	6.02	640	817	174.33	210.12	23	21	25	24	metabolic process		catalytic activity;metal ion binding	Pf04551		TRIAE_CS42_6DL_TGACv1_527100_AA1698560			0	1.228	0.3	0.206313	0.857341	23.26	22.9506	84.7	115.3	10.6	2.39	3	3	78.7	83.3	96.3	116.8	113.5	111.4
High	Master Protein	A0A068CAS6	Phosphoglycerate kinase [OS=Triticum aestivum subsp. tibeticum]	0	126.924	82	22	500	3	1	298	31.4	5.01	1309	1798	382.22	427.25	22	22	20	20	metabolic process		catalytic activity	Pf00162					0	1.261	0.33	0.144425	0.775543	18.02	24.7966	85.1	114.9	9.18	12.32	3	3	85.7	72.9	86	134.2	105.4	115.8
High	Master Protein	A0A1D6B5N4	Uncharacterized protein [OS=Triticum aestivum]	0	126.754	50	22	282	12	1	577	63.3	6.83	1325	1309	233.17	221.59	20	20	21	21	metabolic process		nucleotide binding;protein binding	Pf00004, Pf02151, Pf02861		TRIAE_CS42_6DL_TGACv1_526855_AA1693590			1	1.154	0.21	0.387463	0.943753	25.77	26.5882	96.2	103.8	6.09	11.74	3	3	89.5	100.5	98.4	114.8	90.7	106.1
High	Master Protein	A0A1D6AC03	Uncharacterized protein [OS=Triticum aestivum]	0	126.639	68	18	298	3	1	344	37.2	5.1	1142	920	251.91	255.57	16	17	18	17	metabolic process		catalytic activity	Pf00294, Pf05693		TRIAE_CS42_6AL_TGACv1_473321_AA1530120			18	0.927	-0.11	0.777896	0.98358	24.17	28.5273	108.5	91.5	8.1	7.42	3	3	111.8	113.4	97.5	84.9	98.3	94.2
High	Master Protein	A0A1D5VQX7	Uncharacterized protein [OS=Triticum aestivum]	0	126.463	40	28	277	3	1	1023	112.3	5.62	895	536	226.97	177.15	27	27	24	25	cell organization and biogenesis		protein binding	Pf00626, Pf02209		TRIAE_CS42_3B_TGACv1_220952_AA0724690			24	0.791	-0.34	0.330241	0.940733	15.92	25.43	114.2	85.8	7.16	12.41	3	3	119.8	104.1	115.3	76.3	86.6	97.9
High	Master Protein	W5FDW8	UDP-glucose 6-dehydrogenase [OS=Triticum aestivum]	0	126.173	65	20	284	2	1	480	52.6	6.18	547	706	215.35	217.84	20	19	19	19	metabolic process		catalytic activity;nucleotide binding	Pf00984, Pf03720, Pf03721		TRIAE_CS42_5BL_TGACv1_404418_AA1299220			1	0.871	-0.2	0.821975	0.985276	31.69	22.775	141.1	58.9	21.76	59.33	3	3	120.3	105.6	159.7	44	50.1	120.4
High	Master Protein	A0A1D5ZXR0	tubulin alpha chain [OS=Triticum aestivum]	0	125.555	59	20	318	2	1	451	49.7	4.98	995	992	262.31	222.38	18	18	18	19	cell organization and biogenesis	cytoplasm;cytoskeleton	catalytic activity;nucleotide binding;structural molecule activity	Pf00091, Pf03953		TRIAE_CS42_5DL_TGACv1_436155_AA1458680			3	0.917	-0.13	0.941341	0.993369	26.78	23.703	104.5	95.5	11.61	10.06	3	3	113.7	90	103	94.2	90.3	108.9
High	Master Protein	W5AQE7	Uncharacterized protein [OS=Triticum aestivum]	0	125.553	60	19	675	19	1	332	34.9	5.9	2476	3015	521.63	636.01	18	18	18	19	metabolic process;regulation of biological process		metal ion binding	Pf01716		TRIAE_CS42_2AL_TGACv1_093242_AA0275710			0	1.239	0.31	0.215799	0.871048	36.64	30.6875	98	102	16.89	8.63	3	3	102.2	103.3	75.4	106.5	115.5	97.1
High	Master Protein	C3VQ52	Ascorbate peroxidase [OS=Triticum aestivum]	0	125.436	85	17	659	1	1	243	26.6	5.82	1064	1194	456.28	409.09	15	15	17	17	metabolic process;response to stimulus		antioxidant activity;catalytic activity	Pf00141	100415841		POD1		9	0.979	-0.03	0.996899	0.99955	24.31	28.9365	104	96	5.07	2.66	3	3	107.3	104.3	97.1	95	100	96.3
High	Master Protein	W5AL78	Uncharacterized protein [OS=Triticum aestivum]	0	124.822	41	28	254	3	1	835	92.6	5.17	1046	837	209.01	171.2	25	26	21	21			nucleotide binding	Pf00012, Pf02801		TRIAE_CS42_1DS_TGACv1_081015_AA0256810			0	0.992	-0.01	0.662909	0.983028	25.59	21.3324	101.8	98.2	19.14	17.76	3	3	108	77.9	113.4	104.1	80.8	115.8
High	Master Protein	F6LAX4	Protein phosphatase 2a structural subunit [OS=Triticum aestivum]	0	124.756	59	22	257	22	1	587	65.5	5.07	638	677	200.19	208.43	19	20	21	21			protein binding	Pf02985, Pf13646					0	0.84	-0.25	0.421873	0.943753	26.08	25.886	109	91	12.46	13.07	3	3	106.9	97.7	124.6	89.2	79	102.6
High	Master Protein	W5AK05	glucose-6-phosphate isomerase [OS=Triticum aestivum]	0	124.657	66	21	249	4	1	567	62.2	7.44	466	601	179.64	211.57	20	21	15	15	metabolic process		catalytic activity	Pf00342		TRIAE_CS42_1DS_TGACv1_081340_AA0260080			0	1.113	0.16	0.374402	0.943753	17.47	20.7759	103.9	96.1	16.45	14.7	3	3	116.5	111.2	84.5	105.2	102.9	79.7
High	Master Protein	A0A1D6ALV9	Uncharacterized protein [OS=Triticum aestivum]	0	124.417	36	26	304	3	1	988	112.2	6.24	602	641	219.56	201.53	25	25	25	25	metabolic process		catalytic activity	Pf00311		TRIAE_CS42_6BL_TGACv1_499674_AA1588920			6	0.939	-0.09	0.959358	0.994922	27.16	23.6395	100.2	99.8	15.3	12.46	3	3	99.2	94	124.3	102.9	80.9	98.8
High	Master Protein	A0A1D6CBT5	Mg-protoporphyrin IX chelatase [OS=Triticum aestivum]	0	124.416	59	18	308	1	1	420	45.3	5.71	898	876	234.25	215.24	18	17	18	18	metabolic process		catalytic activity;nucleotide binding			TRIAE_CS42_7BL_TGACv1_579726_AA1909700			0	1.096	0.13	0.406911	0.943753	20.85	20.5286	95.4	104.6	20.3	11.46	3	3	77.7	117	96	90.4	105.2	113.7
High	Master Protein	A0A1D5TV24	Uncharacterized protein [OS=Triticum aestivum]	0	124.239	75	20	747	1	1	262	29.9	5.59	1854	1276	664.26	573.75	17	16	17	18	metabolic process		catalytic activity	Pf00232		TRIAE_CS42_2BL_TGACv1_129561_AA0388630			0	0.477	-1.07	0.010154	0.180456	13.21	20.6821	136.8	63.2	20.55	48.67	3	2	171.2	158.9	113.5	51.3		105.1
High	Master Protein	A0A1D5ZD42	glucose-6-phosphate isomerase [OS=Triticum aestivum]	0	124.222	70	30	255	1	1	620	67.6	5.85	758	779	191.82	205.13	25	26	25	25	metabolic process		catalytic activity	Pf00342		TRIAE_CS42_5BL_TGACv1_408334_AA1362930			2	0.867	-0.21	0.88799	0.990309	25.17	21.1712	108.6	91.4	9.73	7.15	3	3	93	111.2	110.1	102.9	92.8	90
High	Master Protein	W5ES41	Uncharacterized protein [OS=Triticum aestivum]	0	124.181	73	19	333	1	1	368	41.4	6.19	970	862	233.81	254.49	18	18	19	19	metabolic process		catalytic activity	Pf03214		TRIAE_CS42_4DS_TGACv1_361657_AA1171120			0	1.224	0.29	0.178059	0.813216	16.17	23.751	86.9	113.1	14.05	8.44	3	3	80.4	105.2	87.4	98.4	114.7	113.9
High	Master Protein	W5FY62	glucose-6-phosphate isomerase [OS=Triticum aestivum]	0	123.927	68	30	259	3	1	612	67	5.95	773	813	193.73	201.45	25	26	26	26	metabolic process		catalytic activity	Pf00342		TRIAE_CS42_5DL_TGACv1_434738_AA1440810			24	0.945	-0.08	0.854122	0.986776	19.98	25.9046	105.6	94.4	5.34	1.84	3	3	107.1	107.5	97.7	95.7	94.3	97.8
High	Master Protein	A0A1D6DBJ6	Uncharacterized protein [OS=Triticum aestivum]	0	123.821	55	15	1240	1	1	399	43.4	7.24	1686	1495	822.26	713.88	14	14	15	15	metabolic process;response to stimulus		antioxidant activity;catalytic activity	Pf00141		TRIAE_CS42_U_TGACv1_641465_AA2095890			0	0.99	-0.01	0.673821	0.983028	36.56	22.1165	100.5	99.5	4.57	31.94	3	3	103.2	105.1	96.3	65.3	102.2	127.9
High	Master Protein	W5DT83	Uncharacterized protein [OS=Triticum aestivum]	0	123.769	73	19	336	1	1	368	41.5	5.96	1010	809	249.04	244.26	18	18	19	19	metabolic process		catalytic activity	Pf03214		TRIAE_CS42_4AL_TGACv1_289959_AA0979560			21	1.051	0.07	0.70689	0.983028	26.54	28.5594	95	105	10.35	1.24	3	3	91.8	92.6	109.8	100.5	102.9	102.4
High	Master Protein	A0A1D5TPN1	Uncharacterized protein [OS=Triticum aestivum]	0	122.54	29	30	228	3	1	1377	152.2	6.04	398	653	140.26	201.37	23	23	28	28	metabolic process		catalytic activity	Pf02514, Pf11965		TRIAE_CS42_2AS_TGACv1_113806_AA0360900			25	1.386	0.47	0.0571245	0.517574	29.36	25.2537	85.6	114.4	15.75	6.97	3	3	71	97.4	83.5	125.3	111.7	111
High	Master Protein	A0A1D5RY74	malate dehydrogenase [OS=Triticum aestivum]	0	122.371	68	14	249	2	1	341	35.5	8.38	887	1065	191.86	217.23	13	12	14	14	metabolic process		catalytic activity	Pf00056, Pf01073, Pf02866		TRIAE_CS42_1AL_TGACv1_002631_AA0043990			11	1.074	0.1	0.624931	0.979925	30.57	28.1038	99.2	100.8	15.55	11.52	3	3	101	114.5	83.6	102.7	110.4	87.7
High	Master Protein	A0A1D5T3A1	Uncharacterized protein [OS=Triticum aestivum]	0	122.126	30	25	213	4	1	1424	152.1	4.49	794	774	172.13	170.79	21	21	20	19			catalytic activity;nucleotide binding	Pf00735, Pf01926, Pf04548, Pf11886		TRIAE_CS42_1DS_TGACv1_080772_AA0253580			1	0.877	-0.19	0.85266	0.986776	18.24	20.3025	127.7	72.3	48.94	15.69	3	3	147.2	159.5	52.4	83.3	66.5	91.1
High	Master Protein	A0A1D5SBK9	malate dehydrogenase [OS=Triticum aestivum]	0	122.071	70	14	257	2	1	341	35.5	8.38	893	1060	201.53	220.5	14	14	14	14	metabolic process		catalytic activity	Pf00056, Pf01073, Pf02866		TRIAE_CS42_1BL_TGACv1_031464_AA0114600			0	1.144	0.19	0.323506	0.935467	24.01	25.4078	93.5	106.5	10.71	16.1	3	3	82.9	101.1	99.8	113.6	116.8	85.9
High	Master Protein	W5EG56	Uncharacterized protein [OS=Triticum aestivum]	0	121.795	46	16	282	1	1	409	44.3	5.2	619	957	193.4	232.33	14	15	14	14	metabolic process;response to stimulus	extracellular	catalytic activity	Pf00316		TRIAE_CS42_4DL_TGACv1_344100_AA1143650			0	1.127	0.17	0.353337	0.942528	15.54	23.7469	89	111	9.47	11.96	3	3	91.6	102.5	85	114.2	114.5	92.2
High	Master Protein	W5CP58	Uncharacterized protein [OS=Triticum aestivum]	0	121.217	39	25	223	4	1	1094	122.9	6.58	552	472	171.83	158.22	20	22	20	19	metabolic process;regulation of biological process	cytoplasm	catalytic activity;nucleotide binding	Pf00133, Pf01406, Pf08264, Pf09334					20	0.876	-0.19	0.64582	0.982902	22.72	25.545	109.3	90.7	16.14	13.06	3	3	108.5	89.7	124.3	90	81.9	105.6
High	Master Protein	A0A1D6DKE3	Uncharacterized protein [OS=Triticum aestivum]	0	121.118	37	28	260	16	1	1028	112.7	5.86	960	1178	192.3	220.13	23	23	27	27						TRIAE_CS42_U_TGACv1_644502_AA2140060			12	1.114	0.16	0.497272	0.957414	26.68	26.5194	89.8	110.2	4.41	9.75	3	3	91.3	91.4	98.5	112.3	94.3	112.1
High	Master Protein	A0A1D5YI87	UDP-glucose 6-dehydrogenase [OS=Triticum aestivum]	0	121.064	65	20	269	4	1	480	52.6	6.35	545	657	208.91	198.05	20	19	19	19	metabolic process		catalytic activity;nucleotide binding	Pf00984, Pf03720, Pf03721		TRIAE_CS42_5AL_TGACv1_375282_AA1219100			8	0.806	-0.31	0.307135	0.927275	21.44	25.7905	104.2	95.8	23.74	12.52	3	3	98.6	88.6	137.2	90.6	81	103.9
High	Master Protein	W5DYW7	Uncharacterized protein [OS=Triticum aestivum]	0	120.918	78	17	359	1	1	250	27.5	6.24	990	968	247.83	249.25	14	15	15	17	metabolic process;response to stimulus		antioxidant activity;catalytic activity	Pf00141		TRIAE_CS42_4AS_TGACv1_307333_AA1019630			16	0.801	-0.32	0.295049	0.922441	19.15	29.3381	105.7	94.3	14.41	8.91	3	3	126.7	99.1	100.1	84.5	100.4	89.3
High	Master Protein	A0A1D5VHL0	phospholipase D [OS=Triticum aestivum]	0	120.528	45	26	271	1	1	812	92	5.48	878	616	208.13	194.41	24	25	25	25	metabolic process	membrane	catalytic activity;metal ion binding	Pf00614, Pf12357, Pf13091		TRIAE_CS42_3AS_TGACv1_210894_AA0681000			26	0.915	-0.13	0.72287	0.983028	21.2	26.2238	104	96	5.8	5.53	3	3	103.5	98.9	110.9	100.8	95.5	90.3
High	Master Protein	A0A1D5X2F1	aminopeptidase [OS=Triticum aestivum]	0	120.409	47	27	248	5	1	902	100.9	5.19	883	702	233.41	195.4	25	26	21	20	metabolic process		catalytic activity;metal ion binding	Pf01433, Pf11838, Pf13485		TRIAE_CS42_4AL_TGACv1_289060_AA0964280			22	0.807	-0.31	0.368624	0.943753	16.54	25.5433	114.3	85.7	14.71	6.72	3	3	114.6	96	129.3	86	81.3	92.9
High	Master Protein	W5D4Q6	phospholipase D [OS=Triticum aestivum]	0	120.384	45	26	273	1	1	812	92	5.52	808	627	207.02	199.06	24	25	25	25	metabolic process	membrane	catalytic activity;metal ion binding	Pf00614, Pf12357, Pf13091		TRIAE_CS42_3B_TGACv1_222617_AA0767980			0	0.731	-0.45	0.389598	0.943753	7.67	20.4702	112.6	87.4	11.87	8.65	3	3	109.2	131	105.7	77.3	84.8	92
High	Master Protein	A0A1D5XM65	Uncharacterized protein [OS=Triticum aestivum]	0	120.381	46	16	279	1	1	409	44.2	5.2	646	978	188.23	227.06	14	15	14	14	metabolic process		catalytic activity	Pf00316		TRIAE_CS42_4BL_TGACv1_321861_AA1066350			17	1.461	0.55	0.0358695	0.417389	28.61	27.9577	86.5	113.5	8.62	7.87	3	3	76.2	87.8	89.7	124.6	115.2	106.5
High	Master Protein	A0A1D5UDF5	Uncharacterized protein [OS=Triticum aestivum]	0	120.36	30	29	225	1	1	1378	152.3	6.1	409	632	141.76	197.43	22	22	28	28	metabolic process		catalytic activity	Pf02514, Pf11965		TRIAE_CS42_2BS_TGACv1_147485_AA0483770			1	1.285	0.36	0.20661	0.857341	46.56	19.2447	87.5	112.5	50.61	31.24	3	3	90.5	122.6	38.5	116.3	79.8	152.3
High	Master Protein	W5BGL0	Uncharacterized protein [OS=Triticum aestivum]	0	119.751	69	18	1499	2	1	262	28.3	6.79	3123	4119	1265.09	1446.17	17	17	17	16	cellular homeostasis;metabolic process;regulation of biological process		antioxidant activity;catalytic activity	Pf00578, Pf08534, Pf10417		TRIAE_CS42_2BL_TGACv1_131164_AA0423540			16	1.132	0.18	0.44507	0.95075	30.94	30.4077	93.8	106.2	13.1	6.19	3	3	96.4	105.3	80.9	110.1	109	98.3
High	Master Protein	W5EE00	Uncharacterized protein [OS=Triticum aestivum]	0	119.642	63	16	310	5	1	377	41.8	5.49	751	788	222.02	238.24	16	15	16	16			nucleotide binding	Pf00022		TRIAE_CS42_4BS_TGACv1_328472_AA1088460			0	0.765	-0.39	0.308984	0.928792	14.95	24.5975	113.3	86.7	8.11	2.94	3	3	120	102.4	115.3	89.5	84.5	88.2
High	Master Protein	A0A1D6C4A1	Thiamine thiazole synthase, chloroplastic [OS=Triticum aestivum]	0	119.63	55	15	352	15	1	401	42.6	6.24	1158	1072	273.51	286.47	15	15	15	15	metabolic process;response to stimulus	cytosol	catalytic activity;metal ion binding	Pf00890, Pf01266, Pf01946, Pf05834, Pf07992, Pf12831, Pf13450, Pf13454		TRIAE_CS42_7BL_TGACv1_577244_AA1869930			0	1.307	0.39	0.129139	0.745476	31.59	27.8724	92	108	19.93	9.81	3	3	69.6	104.5	90.3	106.1	124.5	105
High	Master Protein	W5EA83	Uncharacterized protein [OS=Triticum aestivum]	0	119.424	73	19	325	2	1	368	41.5	6.19	944	804	225.78	248.4	18	18	19	19	metabolic process		catalytic activity	Pf03214		TRIAE_CS42_4BS_TGACv1_328010_AA1080930			0	1.022	0.03	0.66311	0.983028	29.02	23.0614	100.3	99.7	35.75	11.07	3	3	57	104.2	122.5	94.7	103.6	117.9
High	Master Protein	A0A1D5YMM0	glucose-6-phosphate isomerase [OS=Triticum aestivum]	0	119.408	67	29	251	1	1	614	67	5.96	760	770	184.34	211.54	24	25	24	24	metabolic process		catalytic activity	Pf00342		TRIAE_CS42_5AL_TGACv1_376506_AA1237760			0	1.355	0.44	0.196347	0.839567	45.61	18.7543	92.5	107.5	43.02	36.55	3	3	94.5	45.1	117	158.5	75.2	109.7
High	Master Protein	A0A1D6BXG5	Uncharacterized protein [OS=Triticum aestivum]	0	119.273	76	20	303	20	1	401	43.8	8.27	658	871	203.72	281.29	19	18	20	19			catalytic activity	Pf00266		TRIAE_CS42_7AS_TGACv1_570299_AA1833530			0	1.587	0.67	0.0112559	0.195439	38.99	27.7843	81.9	118.1	9.94	10.06	3	3	70.2	80	85.7	135.4	115.2	113.4
High	Master Protein	A0A1D5UBF5	Uncharacterized protein [OS=Triticum aestivum]	0	119.163	72	16	274	4	1	357	38.7	5.97	815	589	207.03	184.92	16	16	16	16	metabolic process		catalytic activity;protein binding	Pf00891, Pf08100		TRIAE_CS42_2BS_TGACv1_146862_AA0474120			13	0.732	-0.45	0.127767	0.741204	18.95	26.4241	123.7	76.3	19.78	20.98	3	3	125.2	92.7	138.4	66.5	77.3	99.9
High	Master Protein	C0KWE8	glucose-1-phosphate adenylyltransferase [OS=Triticum aestivum]	0	119.14	66	21	275	1	1	514	56.3	6.86	844	743	210.73	220.89	19	19	20	20	metabolic process		catalytic activity;nucleotide binding	Pf00483, Pf12804		TRIAE_CS42_7BS_TGACv1_591785_AA1921060			0	1.256	0.33	0.140733	0.767452	29.56	22.1703	87.4	112.6	22.46	17.13	3	3	72.5	85.4	112.1	128.7	91.1	110.2
High	Master Protein	W5H4V8	aminopeptidase [OS=Triticum aestivum]	0	118.987	46	26	268	1	1	877	98.1	5.49	872	709	210.01	173.62	25	26	19	19	metabolic process		catalytic activity;metal ion binding	Pf01433, Pf11838, Pf13485		TRIAE_CS42_6DS_TGACv1_542494_AA1722390			0
High	Master Protein	A0A1D5XZK3	catalase [OS=Triticum aestivum]	0	118.968	60	19	260	1	1	492	56.7	7.03	704	782	168.61	212.53	17	16	19	18	metabolic process;response to stimulus		antioxidant activity;catalytic activity;metal ion binding	Pf00199, Pf06628		TRIAE_CS42_4DL_TGACv1_343177_AA1131150			0	1.864	0.9	0.00469274	0.102807	51.87	20.1498	69.8	130.2	70.26	18.31	3	3	70.8	108.9	17.1	111.1	160.1	132
High	Master Protein	A0A1D6BV13	glucose-1-phosphate adenylyltransferase [OS=Triticum aestivum]	0	118.894	66	21	275	1	1	514	56.3	6.86	844	745	211.11	227.64	19	19	20	20	metabolic process		catalytic activity;nucleotide binding	Pf00483, Pf12804		TRIAE_CS42_7AS_TGACv1_569682_AA1821750			22	1.023	0.03	0.81476	0.985276	31.68	26.734	99.6	100.4	5.09	13.26	3	3	90.1	97.6	99.3	120.2	98.3	94.6
High	Master Protein	P31251	Ubiquitin-activating enzyme E1 2 [OS=Triticum aestivum]	0	118.551	35	21	264	4	1	1051	116.8	5.24	784	795	228.1	220.57	20	19	21	19	metabolic process		catalytic activity;nucleotide binding	Pf00899, Pf02134, Pf09358, Pf10585					16	0.82	-0.29	0.403148	0.943753	17.2	25.6085	113.1	86.9	3.9	7.72	3	3	117.6	108.7	113	86.9	93.6	80.2
High	Master Protein	A0A1D5XGM1	catalase [OS=Triticum aestivum]	0	118.498	60	19	259	1	1	492	56.8	7.02	704	782	174.71	209.77	17	16	18	18	metabolic process;response to stimulus		antioxidant activity;catalytic activity;metal ion binding	Pf00199, Pf06628		TRIAE_CS42_4BL_TGACv1_320451_AA1039710			19	1.583	0.66	0.0116745	0.201479	22.53	27.2939	77.2	122.8	10.58	7.47	3	3	68.4	77.4	84.6	132.5	123	114.1
High	Master Protein	D8L9S2	glutamate decarboxylase [OS=Triticum aestivum]	0	118.429	57	17	243	1	1	487	54.1	5.78	869	1048	191.35	198.77	16	17	14	14	metabolic process		catalytic activity	Pf00282		TRIAE_CS42_3B_TGACv1_222610_AA0767770			4	1.039	0.06	0.621294	0.979492	37.15	24.0558	90.2	109.8	12.83	13.81	3	3	87.6	88.6	109.2	107.9	117.6	89.1
High	Master Protein	A0A1D5VBT1	alpha-1,4 glucan phosphorylase [OS=Triticum aestivum]	0	118.407	49	19	295	4	1	558	63.2	8.97	794	907	239.96	223.33	18	18	17	17	metabolic process		catalytic activity	Pf00343		TRIAE_CS42_3AL_TGACv1_195488_AA0650140			0	0.931	-0.1	0.958935	0.994922	23.17	22.7987	101.7	98.3	15.24	3.91	3	3	86.7	101.8	117.8	101.6	93.9	98.3
High	Master Protein	A0A1D5V2P6	Uncharacterized protein [OS=Triticum aestivum]	0	118.207	31	29	213	2	1	1374	151.8	6.04	398	605	132.76	185.4	21	21	28	28	metabolic process		catalytic activity	Pf02514, Pf11965		TRIAE_CS42_2DS_TGACv1_179327_AA0606210			0	0.993	-0.01	0.69612	0.983028	41.05	19.0559	67.7	132.3	23	55.55	3	3	87.4	70.2	54.8	137.3	53.7	196.6
High	Master Protein	Q84N28	Flavone O-methyltransferase 1 [OS=Triticum aestivum]	0	117.941	61	15	239	6	1	360	38.8	6.13	543	730	158.54	187.08	15	15	14	13	metabolic process;response to stimulus		catalytic activity;protein binding	Pf00891, Pf08100	543449	TRIAE_CS42_7BL_TGACv1_579947_AA1911100	COMT1		0	0.884	-0.18	0.749866	0.983136	16.9	24.8828	108	92	24.76	9.51	3	3	100.6	88.7	140.7	84.5	85.6	99.9
High	Master Protein	A0A1D5VD11	fructose-bisphosphate aldolase [OS=Triticum aestivum]	0	117.536	72	19	308	1	1	358	38.9	6.79	1234	1016	281.72	249.33	19	18	17	18	metabolic process		catalytic activity	Pf00274		TRIAE_CS42_3AL_TGACv1_195966_AA0655990			6	0.771	-0.38	0.29291	0.922441	26.67	24.9995	112.4	87.6	23.76	6.83	3	3	117.9	79.2	128	85.3	91.8	97.8
High	Master Protein	A0A1D5YX23	glucose-1-phosphate adenylyltransferase [OS=Triticum aestivum]	0	117.476	52	22	269	2	1	502	54.6	8.25	722	859	167.41	222.53	20	20	22	22	metabolic process		catalytic activity;nucleotide binding	Pf00483		TRIAE_CS42_5BL_TGACv1_404151_AA1286990			0	1.05	0.07	0.47253	0.957414	17.29	21.8365	98.9	101.1	12.59	12.51	3	3	82.5	99.1	106	118.3	92.7	101.4
High	Master Protein	D5MTE0	glycosyltransferase [OS=Triticum aestivum]	0	117.474	50	18	264	0	1	456	49.6	5.38	1039	1047	194.13	202.39	18	16	16	16	metabolic process		catalytic activity	Pf00201	100682422		TaGTb		11	0.789	-0.34	0.286829	0.921264	26.48	25.7063	114.9	85.1	12.28	7.26	3	3	111.6	104.7	132.1	82.6	78.5	90.5
High	Master Protein	A0A1D5ZSU2	glucose-1-phosphate adenylyltransferase [OS=Triticum aestivum]	0	117.334	52	22	279	1	1	505	54.9	8.19	820	876	183.53	228.04	20	20	22	22	metabolic process		catalytic activity;nucleotide binding	Pf00483		TRIAE_CS42_5DL_TGACv1_434564_AA1438030			22	1.152	0.2	0.39175	0.943753	32.65	26.3958	93.4	106.6	9.71	10.09	3	3	85.4	89.8	102.7	119.8	102.5	99.9
High	Master Protein	A0A1D6A855	Uncharacterized protein [OS=Triticum aestivum]	0	117.326	51	22	266	2	1	581	65	6.05	928	822	234.9	215.62	21	21	21	20			protein binding	Pf00515, Pf13414, Pf13424, Pf13432		TRIAE_CS42_6AL_TGACv1_471734_AA1513600			0	0.906	-0.14	0.987037	0.999167	12.35	22.292	107.1	92.9	15.98	6.14	3	3	128.5	95.5	102.4	87.1	88.9	97.6
High	Master Protein	W5D0E3	fructose-bisphosphate aldolase [OS=Triticum aestivum]	0	117.19	72	19	295	1	1	358	38.9	7.21	1150	955	270.09	240.78	19	18	17	18	metabolic process		catalytic activity	Pf00274		TRIAE_CS42_3B_TGACv1_222439_AA0764590			0	0.697	-0.52	0.257822	0.896521	11.82	22.1774	119.3	80.7	16.86	12.19	3	3	136.3	97	116.4	78.7	76.4	95.1
High	Master Protein	A0A1D6D1N1	Uncharacterized protein [OS=Triticum aestivum]	0	117.108	64	15	435	2	1	247	25.9	8.47	1148	1210	271.49	377.48	15	15	15	15	metabolic process;regulation of biological process	cytoplasm	metal ion binding;nucleotide binding	Pf00166		TRIAE_CS42_7BS_TGACv1_592517_AA1939680; TRIAE_CS42_7DS_TGACv1_622741_AA2044580			0	1.186	0.25	0.313778	0.93075	12.14	25.8687	91	109	7.24	5.53	3	3	83.4	96.2	92.4	110.7	114.6	102.7
High	Master Protein	A0A1D5V6I7	Uncharacterized protein [OS=Triticum aestivum]	0	117.077	31	20	295	2	1	843	93.7	6.07	716	670	242.56	217.71	16	18	19	19			catalytic activity;nucleotide binding	Pf00009, Pf00679, Pf03144, Pf03764, Pf14492		TRIAE_CS42_3AL_TGACv1_194099_AA0626460			0
High	Master Protein	A0A0C4BJ55	Uncharacterized protein [OS=Triticum aestivum]	0	117.008	70	17	1495	1	1	258	27.9	6.79	3156	4113	1260.84	1442.46	16	16	16	15	cellular homeostasis;metabolic process;regulation of biological process		antioxidant activity;catalytic activity	Pf00578, Pf08534, Pf10417		TRIAE_CS42_2DL_TGACv1_158599_AA0522910			0	1.131	0.18	0.448539	0.951929	11.32	26.571	96.5	103.5	7.7	10.42	3	3	97.2	85.3	98.3	118.4	104.2	96.5
High	Master Protein	A0A1D5WMJ5	Uncharacterized protein [OS=Triticum aestivum]	0	116.966	37	26	254	1	1	1020	111.8	5.57	781	496	208.49	163.83	25	25	21	22	cell organization and biogenesis		protein binding	Pf00626, Pf02209		TRIAE_CS42_3DL_TGACv1_251747_AA0884480			0	0.01	-6.64	1e-17	6.75695e-16			200				1			600
High	Master Protein	A0A1D5VA43	Uncharacterized protein [OS=Triticum aestivum]	0	116.734	60	16	357	1	1	407	45.1	8.69	979	1052	291.63	296.75	15	15	15	15			nucleotide binding	Pf00012, Pf06723		TRIAE_CS42_3AL_TGACv1_194959_AA0642710			0
High	Master Protein	A0A1D6AZI3	Uncharacterized protein [OS=Triticum aestivum]	0	116.626	45	22	281	5	1	530	59.4	4.79	683	854	192.34	206.55	18	19	19	19	metabolic process	endoplasmic reticulum;membrane	metal ion binding;protein binding	Pf00262		TRIAE_CS42_6BS_TGACv1_514516_AA1660860			18	0.987	-0.02	0.963651	0.995672	32.27	27.6873	100.9	99.1	15.59	15.73	3	3	108.7	107.7	81.4	105.7	113.4	83
High	Master Protein	A0A1D6BWG7	Uncharacterized protein [OS=Triticum aestivum]	0	116.5	64	15	423	2	1	247	25.9	8.48	1128	1214	262.45	373.01	15	15	14	14	metabolic process;regulation of biological process	cytoplasm	metal ion binding;nucleotide binding	Pf00166		TRIAE_CS42_7AS_TGACv1_569989_AA1828190			14	1.197	0.26	0.291382	0.922441	30.29	29.4497	100.9	99.1	13.49	7.58	3	3	102	104.9	81.2	98.6	113	100.2
High	Master Protein	A0A1D5ZRP2	Uncharacterized protein [OS=Triticum aestivum]	0	116.224	43	17	253	3	1	645	68.9	5.96	1142	786	254.41	178.49	17	17	15	15	metabolic process		catalytic activity	Pf00933, Pf01915		TRIAE_CS42_5DL_TGACv1_434288_AA1433330			20	0.587	-0.77	0.00735986	0.145353	13.99	26.962	125.6	74.4	14.24	25.1	3	3	142.9	129.5	107.2	76.7	90.1	53.7
High	Master Protein	D5MTD9	glycosyltransferase [OS=Triticum aestivum]	0	116.207	50	17	263	1	1	456	49.6	5.52	909	872	192.41	197.47	17	15	15	15	metabolic process		catalytic activity	Pf00201					0	0.854	-0.23	0.7276	0.983028	30.47	23.1249	111.5	88.5	31.29	6.06	3	3	140.6	72.9	113	89.7	86.6	97.3
High	Master Protein	A0A1D5V1S7	Uncharacterized protein [OS=Triticum aestivum]	0	116.122	44	25	221	2	1	1123	122.8	4.89	360	384	171.97	150.93	24	23	21	21	transport	nucleus	protein binding	Pf05413, Pf06122, Pf13513, Pf13646		TRIAE_CS42_2DS_TGACv1_178842_AA0601690			0	1.05	0.07	0.451284	0.953825	56.64	21.4943	86.9	113.1	65.74	31.83	3	3	75.6	54.6	182.4	98.4	64.1	124.9
High	Master Protein	W5EPW0	aminopeptidase [OS=Triticum aestivum]	0	116.102	47	26	229	4	1	871	97.8	5.16	847	632	221.39	176.62	24	25	20	19	metabolic process		catalytic activity;metal ion binding	Pf01433, Pf11838, Pf13485		TRIAE_CS42_4DS_TGACv1_361176_AA1162760			0	0.831	-0.27	0.689552	0.983028	21.5	21.8528	104	96	10.24	16.91	3	3	109	90.5	108.4	79.7	100.1	112.3
High	Master Protein	A0A1D5XVT4	Uncharacterized protein [OS=Triticum aestivum]	0	116.021	50	23	276	6	1	574	61.1	5.76	1005	1243	208.14	229.74	22	23	23	23	metabolic process	cytoplasm	nucleotide binding	Pf00118		TRIAE_CS42_4DL_TGACv1_342407_AA1112830			6	0.994	-0.01	0.822623	0.985276	23.04	25.5519	105.6	94.4	12.71	6.51	3	3	112.7	105.7	87.5	94.3	105.4	94.4
High	Master Protein	A0A1D6S2S6	pyruvate kinase [OS=Triticum aestivum]	0	115.644	54	20	249	20	1	527	57.4	6.95	723	756	186.84	190.18	20	19	17	17	metabolic process		catalytic activity;metal ion binding	Pf00224, Pf02887		TRIAE_CS42_5BL_TGACv1_404884_AA1314140			0	0.781	-0.36	0.237004	0.884424	19.48	26.3635	117.5	82.5	17.92	11.02	3	3	114.9	93.8	134.9	79.4	80.6	96.3
High	Master Protein	Q332R4	ATP synthase subunit alpha [OS=Triticum aestivum]	0	115.375	50	22	429	15	1	509	55.3	5.9	1236	1163	322.91	317.3	21	20	21	20	metabolic process;transport	mitochondrion	catalytic activity;nucleotide binding;transporter activity	Pf00006, Pf00306, Pf02874, Pf09378	3800068		atp1	MT	5	1.06	0.08	0.676734	0.983028	22.54	28.9744	98.6	101.4	3.78	10.95	3	3	99.5	100	93.4	113.7	102.3	91.2
High	Master Protein	A0A1D5SQ20	Serine hydroxymethyltransferase [OS=Triticum aestivum]	0	115.285	51	20	227	5	1	533	58	7.8	539	589	135.05	152.12	19	18	17	16	metabolic process		catalytic activity	Pf00155, Pf00464		TRIAE_CS42_1DL_TGACv1_061112_AA0185800			13	0.953	-0.07	0.890776	0.990309	20.55	25.9465	103.4	96.6	3.63	1.89	3	3	105.6	104	98.5	99.3	95.6	97.1
High	Master Protein	A0A1D5T8H3	aminomethyltransferase [OS=Triticum aestivum]	0	115.135	52	17	293	3	1	414	44.2	8.44	895	974	217.9	242.24	16	16	17	17	metabolic process	mitochondrion	catalytic activity	Pf01571, Pf08669		TRIAE_CS42_2AL_TGACv1_093548_AA0282400			14	1.271	0.35	0.171043	0.802535	27.22	27.5368	86.5	113.5	17.03	5.61	3	3	75.4	83.1	104.2	119.7	108.7	108.9
High	Master Protein	A0A1D5URU5	D-3-phosphoglycerate dehydrogenase [OS=Triticum aestivum]	0	115.11	48	21	260	3	1	674	70.1	6.95	787	765	209.07	191.27	20	20	19	20	metabolic process		catalytic activity;nucleotide binding	Pf00208, Pf00389, Pf00670, Pf01842, Pf02826, Pf05221, Pf07991		TRIAE_CS42_2DL_TGACv1_160628_AA0552420			19	0.863	-0.21	0.511065	0.957414	25.72	26.5692	105	95	11.04	11.07	3	3	101.2	98.3	119.9	91.5	84.3	104.7
High	Master Protein	A0A1D5TJN3	Uncharacterized protein [OS=Triticum aestivum]	0	114.835	44	25	211	2	1	1123	122.8	4.89	398	392	173.76	138.81	24	23	20	20	transport	nucleus	protein binding	Pf05413, Pf06122, Pf13513, Pf13646		TRIAE_CS42_2AS_TGACv1_112348_AA0336160			24	0.811	-0.3	0.421715	0.943753	27.01	25.0391	113.9	86.1	20.17	21.95	3	3	106.5	92	136.2	80.5	74.2	110.5
High	Master Protein	W5DX10	Uncharacterized protein [OS=Triticum aestivum]	0	114.532	60	23	251	7	1	482	52.7	7.5	750	584	194.71	158.47	22	23	20	20	metabolic process		catalytic activity;metal ion binding	Pf00067		TRIAE_CS42_4AS_TGACv1_307830_AA1023750			17	0.739	-0.44	0.140994	0.767452	14.97	26.7351	115.6	84.4	10.22	10.58	3	3	129.4	105.4	118.9	86.9	72.1	87.4
High	Master Protein	W5G6L7	Uncharacterized protein [OS=Triticum aestivum]	0	114.496	68	21	301	1	1	502	54.3	5.62	932	887	254.92	218.16	20	21	18	19	metabolic process;response to stimulus	cytoplasm	catalytic activity	Pf00171		TRIAE_CS42_6AL_TGACv1_471221_AA1504980			0	0.847	-0.24	0.753723	0.983136	4.1	22.3034	108.3	91.7	18.41	2.1	3	3	82.5	113.3	117.9	96	97	93.2
High	Master Protein	A0A1D6CLX4	Uncharacterized protein [OS=Triticum aestivum]	0	114.284	52	14	338	1	1	261	28.8	4.84	1063	988	305.54	248.95	14	13	13	13			protein binding	Pf00244		TRIAE_CS42_7DL_TGACv1_602737_AA1967030			11	0.901	-0.15	0.788788	0.98358	33.31	25.0878	105.3	94.7	12.36	12.79	3	3	96.1	103	121.7	92.5	81.5	105.3
High	Master Protein	A0A1D6CIA9	Uncharacterized protein [OS=Triticum aestivum]	0	114.174	62	26	288	3	1	526	58.8	5.2	721	924	190.59	233.82	24	24	23	25	metabolic process;transport			Pf05697, Pf05698		TRIAE_CS42_7BS_TGACv1_593090_AA1947990			0	1.177	0.23	0.24805	0.888177	20.82	23.659	92.6	107.4	1.3	2.81	3	3	90.7	92.9	92.7	111.1	107.5	105.1
High	Master Protein	A0A1D5VZC0	glutamate decarboxylase [OS=Triticum aestivum]	0	114.121	57	17	239	1	1	490	54.3	5.78	855	954	191.35	198.77	16	17	14	14	metabolic process		catalytic activity	Pf00282		TRIAE_CS42_3B_TGACv1_222610_AA0767770			0	0.01	-6.64	1e-17	6.75695e-16			200				1		600
High	Master Protein	Q9FXQ8	TaWIN2 [OS=Triticum aestivum]	0	113.999	53	14	334	1	1	259	28.7	4.89	1063	984	305.54	250.58	13	12	13	12			protein binding	Pf00244	542786	TRIAE_CS42_7AL_TGACv1_556431_AA1762810	WIN2		0	1.029	0.04	0.534792	0.960041	33.73	21.8108	95	105	42.02	15.55	3	3	85.2	76.4	157.9	94.2	78.6	107.7
High	Master Protein	A0A1D6SCX5	sucrose synthase [OS=Triticum aestivum]	0	113.877	40	23	223	19	1	808	92.4	6.09	472	393	160.17	136.75	21	22	21	21	metabolic process		catalytic activity	Pf00534, Pf00862, Pf13524		TRIAE_CS42_7AS_TGACv1_570668_AA1839220			4	0.669	-0.58	0.0556212	0.516953	13.69	25.47	124.8	75.2	18.88	5.74	3	3	135.2	94.4	132.2	79.7	74.7	83.8
High	Master Protein	A0A1D5WNE1	Uncharacterized protein [OS=Triticum aestivum]	0	113.624	63	20	242	20	1	434	48.2	4.94	553	473	185.88	156.29	20	20	16	16	metabolic process	cytoplasm	catalytic activity;nucleotide binding	Pf00004, Pf07724, Pf07726, Pf07728, Pf13191		TRIAE_CS42_3DL_TGACv1_252156_AA0887980			0	0.768	-0.38	0.204163	0.855947	16.28	26.2582	116.5	83.5	10.69	12.18	3	3	124.9	100.8	115.9	77.5	83.1	97.8
High	Master Protein	A0A1D6BWF0	Uncharacterized protein [OS=Triticum aestivum]	0	113.441	62	26	282	3	1	526	58.9	5.2	758	943	187.22	234.91	24	24	23	25	metabolic process;transport			Pf05697, Pf05698		TRIAE_CS42_7AS_TGACv1_569971_AA1827950			23	1.154	0.21	0.386726	0.943753	24.77	27.4491	92.5	107.5	9.59	5.37	3	3	82.7	99.9	94.7	110.1	101	111.6
High	Master Protein	A0A1D6BXD5	Uncharacterized protein [OS=Triticum aestivum]	0	113.269	35	18	291	1	1	657	71.4	4.96	955	1020	208.28	243.49	16	16	18	18	metabolic process	membrane	catalytic activity	Pf00251, Pf08244, Pf11837		TRIAE_CS42_7AS_TGACv1_570274_AA1833190			1	1.061	0.09	0.510785	0.957414	21.29	24.2898	100.4	99.6	18.97	9.05	3	3	78.6	115.4	104.6	90.2	107.5	103.8
High	Master Protein	A0A1D5XJM8	Uncharacterized protein [OS=Triticum aestivum]	0	112.855	39	26	214	1	1	975	108.6	7.09	674	568	169.47	159.19	23	22	22	22	metabolic process;response to stimulus	cytoplasm	nucleotide binding	Pf00004, Pf01695, Pf02861, Pf03962, Pf04111, Pf04156, Pf07724, Pf07728, Pf08317, Pf10431, Pf13191, Pf13401		TRIAE_CS42_4BL_TGACv1_321072_AA1054840			0	1.383	0.47	0.109374	0.70876	21.41	19.5808	83.9	116.1	9.81	20.1	3	3	75.3	89.1	90.2	123.2	89	133.2
High	Master Protein	A0A1D5YJU9	glucose-1-phosphate adenylyltransferase [OS=Triticum aestivum]	0	112.827	46	21	257	2	1	505	54.8	8.25	813	849	177.46	217.61	19	19	20	20	metabolic process		catalytic activity;nucleotide binding	Pf00483		TRIAE_CS42_5AL_TGACv1_375681_AA1225500			0	0.867	-0.21	0.857155	0.986776	6.86	21.5542	84.7	115.3	14.49	25.48	3	3	88.2	85.7	110.6	120.1	74.2	121.2
High	Master Protein	Q38J50	Tricetin 3',4',5'-O-trimethyltransferase [OS=Triticum aestivum]	0	112.527	70	16	250	1	1	356	38.5	6.09	549	650	165.48	189.54	16	16	16	15	metabolic process		catalytic activity;protein binding	Pf00891, Pf08100	780608		LOC780608		22	0.996	-0.01	0.92738	0.992737	41.73	26.5305	102.6	97.4	31	18.76	3	3	92.8	82.6	144.3	88.1	79.2	113
High	Master Protein	A0A1D5U1G0	Uncharacterized protein [OS=Triticum aestivum]	0	112.513	69	19	242	18	1	362	39	5.64	707	845	178.48	244.22	15	15	19	18	metabolic process		catalytic activity	Pf00702, Pf09419, Pf13242, Pf13344		TRIAE_CS42_2BL_TGACv1_130899_AA0419580			1	1.525	0.61	0.0201026	0.293437	33.78	26.7954	83	117	14.21	8.55	3	3	68.4	81.2	91.2	131.5	114.4	113.2
High	Master Protein	A0A1D5WXY0	Uncharacterized protein [OS=Triticum aestivum]	0	112.319	34	18	288	1	1	658	71.4	4.96	784	933	204.4	239.02	16	16	18	18	metabolic process	membrane	catalytic activity	Pf00251, Pf08244, Pf11837		TRIAE_CS42_4AL_TGACv1_288223_AA0941200			18	0.928	-0.11	0.78207	0.98358	26.81	27.4725	106.6	93.4	22.79	7.22	3	3	77.2	123.3	106.8	93.6	93.4	105.7
High	Master Protein	A0A1D5T3W0	Dihydrolipoyl dehydrogenase [OS=Triticum aestivum]	0	112.2	51	17	261	1	1	566	59.2	6.8	1081	906	225.93	190.55	17	17	17	17	cellular homeostasis;metabolic process;regulation of biological process		catalytic activity;nucleotide binding	Pf00070, Pf02852, Pf07992, Pf13434		TRIAE_CS42_1DS_TGACv1_081003_AA0256670			0	0.983	-0.02	0.814656	0.985276	24.82	23.2478	109.1	90.9	21.14	14.31	3	3	112.9	115.7	77.1	94	113.7	86.6
High	Master Protein	A0A1D5YI42	Uncharacterized protein [OS=Triticum aestivum]	0	112.021	39	26	208	1	1	974	108.6	7.09	670	565	165.43	154.2	23	22	21	21	metabolic process;response to stimulus	cytoplasm	nucleotide binding	Pf00004, Pf01695, Pf02861, Pf04111, Pf07724, Pf07728, Pf08317, Pf10431, Pf13191, Pf13401		TRIAE_CS42_5AL_TGACv1_375255_AA1218640			24	1.117	0.16	0.412305	0.943753	26.35	25.6177	91.5	108.5	7.41	7.29	3	3	91.8	90.1	103	110	96.2	108.8
High	Master Protein	A0A1D5SNJ3	Uncharacterized protein [OS=Triticum aestivum]	0	111.997	26	24	199	4	1	1478	157.3	4.53	428	455	154.39	134.95	21	21	18	17			catalytic activity;nucleotide binding	Pf00735, Pf01926, Pf03193, Pf04548, Pf11886		TRIAE_CS42_1BS_TGACv1_051023_AA0177300			0	0.887	-0.17	0.918014	0.991839	27.48	22.7044	108.9	91.1	12.92	21.84	3	3	106.6	118	90.9	77.5	89.3	117.8
High	Master Protein	A0A1D6AYA8	Uncharacterized protein [OS=Triticum aestivum]	0	111.673	58	16	258	1	1	398	41.1	8.22	780	1236	166.91	236.52	16	16	16	16			catalytic activity	Pf01370, Pf13460		TRIAE_CS42_6BS_TGACv1_514094_AA1655040			18	1.48	0.57	0.0302621	0.38489	27.14	28.1775	83.2	116.8	11.36	5.61	3	3	70.4	83.4	88.1	126.9	117	114.2
High	Master Protein	A0A1D5YMQ8	catalase [OS=Triticum aestivum]	0	111.519	60	19	239	3	1	492	56.7	7.03	601	743	160.44	191.27	17	15	19	19	metabolic process;response to stimulus		antioxidant activity;catalytic activity;metal ion binding	Pf00199, Pf06628		TRIAE_CS42_5AL_TGACv1_376544_AA1238210			0	1.482	0.57	0.0273794	0.361187	36.84	22.4648	89.7	110.3	30.65	13.52	3	3	52	97.3	91	138.6	109.2	112
High	Master Protein	A0A1D6S8H3	aminopeptidase [OS=Triticum aestivum]	0	110.854	43	26	245	4	1	964	107.6	5.59	718	543	200.61	158.65	25	26	19	18	metabolic process		catalytic activity;metal ion binding	Pf01433, Pf11838, Pf13485		TRIAE_CS42_6AS_TGACv1_486130_AA1557260			1	0.775	-0.37	0.500743	0.957414	16.71	22.1001	117.4	82.6	16.6	3.42	3	3	91.7	124.2	124.3	83.3	89.1	87.4
High	Master Protein	A0A1D6RLR1	Uncharacterized protein [OS=Triticum aestivum]	0	110.785	36	23	253	1	1	823	93	5.77	483	584	169.6	179.51	20	22	22	22	metabolic process		catalytic activity	Pf00128, Pf02806, Pf02922, Pf14701		TRIAE_CS42_2BL_TGACv1_131322_AA0425980			2	1.012	0.02	0.629446	0.980056	17.75	22.4705	100.3	99.7	2.8	4.26	3	3	101.5	103	97.6	94.5	102.5	100.9
High	Master Protein	D4NYD5	cytosolic aconitase [OS=Triticum aestivum]	0	110.723	59	18	260	2	1	456	50.2	6.18	620	700	184.41	196.3	17	17	17	17	metabolic process			Pf00330, Pf00694	100682506		cACO		0	0.79	-0.34	0.538273	0.960041	11.94	21.2032	110.3	89.7	12.59	6.44	3	3	93.1	110.2	119.8	88.1	99.1	89.7
High	Master Protein	A0A1D6AT12	Uncharacterized protein [OS=Triticum aestivum]	0	110.515	47	20	235	3	1	593	65	7.18	592	405	207.69	150.46	20	19	17	18	metabolic process	cytoplasm	nucleotide binding;protein binding	Pf00118		TRIAE_CS42_6BL_TGACv1_501798_AA1620800			21	0.767	-0.38	0.222205	0.878136	22.6	25.7262	117.7	82.3	11.56	13.83	3	3	122.7	97.8	116.9	81.8	79.4	101.4
High	Master Protein	A0A1D5UMU8	plasma membrane ATPase [OS=Triticum aestivum]	0	110.411	32	21	231	18	1	951	104.7	6.81	630	453	199.46	130.16	20	19	18	20	metabolic process;transport	membrane	catalytic activity;nucleotide binding;transporter activity	Pf00122, Pf00690, Pf00702, Pf12710		TRIAE_CS42_2DL_TGACv1_159228_AA0534890			3	0.823	-0.28	0.440136	0.947919	21.84	25.4412	115.3	84.7	14.2	14.87	3	3	114.3	94.4	125.6	84	78.2	103.4
High	Master Protein	W5EQ69	UDP-glucose 6-dehydrogenase [OS=Triticum aestivum]	0	110.284	62	20	233	7	1	480	52.8	6.13	565	506	193.44	180.39	19	18	17	16	metabolic process		catalytic activity;nucleotide binding	Pf00984, Pf03720, Pf03721		TRIAE_CS42_4DS_TGACv1_361591_AA1170510			12	0.869	-0.2	0.534609	0.960041	25.76	27.1908	104.4	95.6	15.96	9.11	3	3	101.2	95.7	128	82.9	92.6	99.6
High	Master Protein	X2D2V6	Lipoxygenase [OS=Triticum aestivum]	0	110.254	46	26	270	7	1	861	96	6.1	465	450	200.28	190.7	26	26	23	22	metabolic process		catalytic activity;metal ion binding;protein binding	Pf00305, Pf01477		TRIAE_CS42_4BS_TGACv1_329963_AA1105070			19	0.768	-0.38	0.203688	0.855661	14.5	25.7696	112.8	87.2	12.89	9.01	3	3	130.1	111.3	101.1	93.5	78	86
High	Master Protein	A0A1D5XQ85	alanine--tRNA ligase [OS=Triticum aestivum]	0	110.22	32	22	258	2	1	1006	109.5	6.62	844	710	202.07	173.05	21	21	21	20	metabolic process	cytoplasm;mitochondrion	catalytic activity;metal ion binding;nucleotide binding;RNA binding	Pf01411, Pf07973		TRIAE_CS42_4BS_TGACv1_328059_AA1082050			24	0.874	-0.19	0.553505	0.960787	15	26.1849	108.2	91.8	3.66	2.03	3	3	110.7	103.2	109	94.2	90.5	92.4
High	Master Protein	G3CCE7	Starch branching enzyme IIa [OS=Triticum aestivum]	0	110.192	36	23	259	1	1	823	93	5.72	478	561	173.54	188.21	20	22	22	22	metabolic process		catalytic activity	Pf00128, Pf02806, Pf02922, Pf14701		TRIAE_CS42_2AL_TGACv1_093925_AA0289500			0	0.867	-0.21	0.818884	0.985276	24.69	20.2149	107.1	92.9	32.41	5.84	3	3	139.8	108.8	70.9	87.6	94.3	98.5
High	Master Protein	A0A1D6B7C8	Phenylalanine ammonia-lyase [OS=Triticum aestivum]	0	110.188	50	24	265	15	1	714	77.1	6.19	749	754	193.11	192.56	20	22	18	22	metabolic process	cytoplasm	catalytic activity	Pf00221		TRIAE_CS42_6DL_TGACv1_527273_AA1701620			3	1.214	0.28	0.196296	0.839567	29.48	25.0876	87.8	112.2	17.53	8.97	3	3	78.1	85.6	108.6	109.3	99.4	119
High	Master Protein	A0A1D6ALN8	Uncharacterized protein [OS=Triticum aestivum]	0	110.16	68	21	299	1	1	503	54.4	5.72	937	857	255.82	224.14	20	21	18	19	metabolic process		catalytic activity	Pf00171		TRIAE_CS42_6BL_TGACv1_499647_AA1588160			20	0.88	-0.18	0.579247	0.967746	19.4	27.2388	107.8	92.2	5.81	1.76	3	3	114.6	107	102.2	93.9	91.6	90.7
High	Master Protein	A0A1D6C241	Uncharacterized protein [OS=Triticum aestivum]	0	110.143	72	19	274	4	1	337	35.6	5.21	635	628	201.74	208.78	17	18	18	18			catalytic activity	Pf00294		TRIAE_CS42_7BL_TGACv1_576818_AA1855980			15	0.869	-0.2	0.533139	0.960041	18.36	27.3906	109	91	6.81	3.56	3	3	100.3	111.5	114.3	93.3	87.5	93.1
High	Master Protein	A0A1D5X268	ferredoxin--NADP reductase [OS=Triticum aestivum]	0	109.572	61	17	273	6	1	362	39.9	8.25	771	911	197.33	227.38	16	16	17	17	metabolic process		catalytic activity	Pf00175, Pf00667, Pf00970		TRIAE_CS42_4AL_TGACv1_288999_AA0963090			0	1.525	0.61	0.0178306	0.270375	27.17	25.2796	74.7	125.3	10.65	15.75	3	3	68.7	84.9	75.5	141.3	126.7	102.8
High	Master Protein	C7C4X1	glyceraldehyde-3-phosphate dehydrogenase [OS=Triticum aestivum]	0	109.238	70	17	1014	12	1	337	36.5	7.18	4454	4868	802.43	751.95	17	16	17	17	metabolic process		catalytic activity;nucleotide binding	Pf00044, Pf01113, Pf01408, Pf02800	100415882	TRIAE_CS42_7AL_TGACv1_559736_AA1800650; TRIAE_CS42_7BL_TGACv1_576876_AA1858250; TRIAE_CS42_7DL_TGACv1_604750_AA2001310	ga3pd		1	0.856	-0.22	0.481603	0.957414	24.45	27.6345	107.5	92.5	3.4	6.36	3	3	110.5	109.7	103.8	96.3	94.4	85.4
High	Master Protein	A0A1D6D5U3	Uncharacterized protein [OS=Triticum aestivum]	0	108.987	55	21	232	3	1	549	59.2	6.86	872	687	180.07	178.85	20	20	15	16	metabolic process		catalytic activity	Pf00171, Pf05893		TRIAE_CS42_7DS_TGACv1_625206_AA2064580			18	0.886	-0.17	0.602911	0.970619	20.5	26.9459	107.9	92.1	3.91	11.21	3	3	112.6	110.4	104.4	98.9	94.3	79.4
High	Master Protein	A0A1D5W9E0	Uncharacterized protein [OS=Triticum aestivum]	0	108.898	63	16	351	5	1	315	33.3	8.29	1258	1201	269.27	293.65	14	15	16	15	metabolic process		catalytic activity	Pf00121		TRIAE_CS42_3B_TGACv1_226284_AA0815680			13	0.948	-0.08	0.868289	0.987925	19.95	28.9906	101.5	98.5	2.23	4.51	3	3	99.4	103.9	102.3	101.8	99.3	93.2
High	Master Protein	A0A1D5W804	Uncharacterized protein [OS=Triticum aestivum]	0	108.858	42	23	231	3	1	747	83.4	6.46	525	570	165.11	191.2	19	19	23	23	metabolic process	cytoplasm	catalytic activity;nucleotide binding	Pf00587, Pf03129, Pf09180		TRIAE_CS42_3B_TGACv1_225463_AA0808650			20	1.048	0.07	0.719339	0.983028	26.07	26.2745	96.1	103.9	8.96	1.9	3	3	93.7	91.9	107.9	100.8	104.4	101.3
High	Master Protein	A0A1D5SQ78	Uncharacterized protein [OS=Triticum aestivum]	0	108.825	53	16	250	16	1	516	55.1	5.3	727	733	203.68	222.54	15	15	15	14	metabolic process		catalytic activity	Pf00026, Pf03489, Pf05184, Pf14541, Pf14543		TRIAE_CS42_1DL_TGACv1_061137_AA0186580			0	0.929	-0.11	0.786032	0.98358	20.64	26.3554	106.4	93.6	5.66	4.72	3	3	110	106.8	98.5	99.8	91	94
High	Master Protein	B0LXM0	S-adenosylmethionine synthase [OS=Triticum aestivum]	0	108.776	62	14	477	7	1	396	43.2	5.88	1098	719	285.46	171.88	13	13	12	12	metabolic process	cytoplasm	catalytic activity;metal ion binding;nucleotide binding	Pf00438, Pf02772, Pf02773	100146080		SAMS		0	0.611	-0.71	0.0661765	0.557051	12.68	23.2759	125	75	29.77	10.31	3	3	159.1	86	123.3	86.2	71.3	74
High	Master Protein	Q9FEE4	Ribulose bisphosphate carboxylase small chain [OS=Triticum aestivum]	0	108.462	61	12	459	1	1	174	19.4	8.76	1225	1551	343.78	360.64	12	12	11	11	metabolic process		catalytic activity	Pf00101, Pf12338		TRIAE_CS42_2DS_TGACv1_177171_AA0567540			1	1.094	0.13	0.559422	0.962	67.03	28.7068	76.9	123.1	21.23	11.26	3	3	74.2	69.7	101.8	131.1	104.5	118.7
High	Master Protein	A0A0C4BJ74	Uncharacterized protein [OS=Triticum aestivum]	0	108.442	71	22	269	2	1	496	53	6.84	548	583	193.73	223.9	20	18	22	21	metabolic process		catalytic activity	Pf00171, Pf05893		TRIAE_CS42_2DS_TGACv1_177805_AA0584930			21	1.389	0.47	0.0667109	0.559489	32.08	27.168	87.7	112.3	7.01	10.08	3	3	80.7	92.7	85.1	126.9	109	105.5
High	Master Protein	A0A1D5S7R0	Dihydrolipoyl dehydrogenase [OS=Triticum aestivum]	0	108.117	51	17	253	1	1	566	59.2	6.89	1050	921	217.57	187.94	17	17	17	17	cellular homeostasis;metabolic process;regulation of biological process		catalytic activity;nucleotide binding	Pf00070, Pf02852, Pf07992, Pf13434		TRIAE_CS42_1BL_TGACv1_030590_AA0094950			17	1.018	0.03	0.835234	0.986701	28.45	26.9241	101.6	98.4	6.31	2.14	3	3	94	102.8	106.4	100.6	96.6	99.6
High	Master Protein	A0A1D6D888	Carbonic anhydrase [OS=Triticum aestivum]	0	108.099	59	14	291	14	1	259	28.1	8.07	614	662	197.98	246.42	13	12	14	14			catalytic activity;metal ion binding	Pf00484		TRIAE_CS42_U_TGACv1_640915_AA2078930			0	1.696	0.76	0.00397538	0.0906651	30.58	28.9535	78.1	121.9	10.78	5.55	3	3	73.4	78.7	90.4	123.2	122.7	111.5
High	Master Protein	I3NM23	Lipoxygenase [OS=Triticum aestivum]	0	108.028	44	24	241	10	1	861	95.9	6.28	552	532	188.24	176.52	24	24	20	19	metabolic process		catalytic activity;metal ion binding;protein binding	Pf00305, Pf01477		TRIAE_CS42_4DS_TGACv1_362339_AA1178930			0	0.733	-0.45	0.241274	0.886441	11.18	23.7002	114.7	85.3	9.44	4.62	3	3	128.1	111.6	107.4	88.7	81.2	83
High	Master Protein	A0A1D5YEQ2	Uncharacterized protein [OS=Triticum aestivum]	0	107.941	39	24	220	3	1	988	110.1	6.4	714	537	156.09	175.36	21	21	21	21	metabolic process		catalytic activity;metal ion binding	Pf01433, Pf11940, Pf13485		TRIAE_CS42_5AL_TGACv1_374572_AA1203580			18	0.991	-0.01	0.85428	0.986776	20.36	25.6811	100	100	2.47	4.36	3	3	101.9	97.4	101.4	101.4	94.9	103.1
High	Master Protein	A0A077RW30	cysteine synthase [OS=Triticum aestivum]	0	107.673	59	16	319	5	1	392	41.1	6.4	1080	968	240.11	252.19	15	15	16	16	metabolic process		catalytic activity	Pf00291		TRIAE_CS42_3B_TGACv1_222728_AA0769570			12	1.136	0.18	0.435696	0.947919	20.88	28.1813	91.5	108.5	4.52	8.22	3	3	89.6	97.9	92.5	109.6	113.6	96.8
High	Master Protein	A0A1D6ANS3	Uncharacterized protein [OS=Triticum aestivum]	0	107.662	53	22	271	22	1	485	53.4	9.07	680	709	168.14	208.44	20	19	21	20	metabolic process		catalytic activity;nucleotide binding			TRIAE_CS42_6BL_TGACv1_500154_AA1600140			0	1.218	0.28	0.251942	0.888177	23.17	27.3847	93.5	106.5	7.44	13.58	3	3	83.9	96.6	94.7	123.2	93.8	107.8
High	Master Protein	A0A1D5UII2	Uncharacterized protein [OS=Triticum aestivum]	0	107.507	36	23	240	3	1	825	93.1	5.81	417	477	149.5	178.92	18	20	22	22	metabolic process		catalytic activity	Pf00128, Pf02806, Pf02922, Pf14701		TRIAE_CS42_2DL_TGACv1_158310_AA0515330			20	1.001	0	0.79563	0.984397	27.53	25.5639	95.8	104.2	11.57	13.94	3	3	93.2	95.4	114.4	109.7	83.4	103.9
High	Master Protein	A0A1D5XX39	Uncharacterized protein [OS=Triticum aestivum]	0	107.246	76	18	338	4	1	266	29.5	4.83	990	1080	276.14	239.07	16	16	16	17			protein binding	Pf00244		TRIAE_CS42_4DL_TGACv1_342693_AA1119840			13	0.84	-0.25	0.424494	0.943753	23.59	26.2721	103.9	96.1	7.56	7.15	3	3	117.4	103	103.5	84.4	95.8	95.9
High	Master Protein	A0A1D6CT74	Uncharacterized protein [OS=Triticum aestivum]	0	107.236	45	23	232	5	1	769	86.1	5.95	499	587	137.63	154.92	18	20	22	22	metabolic process		catalytic activity	Pf00326, Pf02897		TRIAE_CS42_7DL_TGACv1_604548_AA1999320			18	1.072	0.1	0.520203	0.957414	23.52	25.399	90.1	109.9	19.68	6.82	3	3	83.3	83.7	115.6	102.1	101.3	114.1
High	Master Protein	W5GV92	Uncharacterized protein [OS=Triticum aestivum]	0	107.189	52	19	236	2	1	535	59	6.62	569	375	213.02	155.26	19	18	16	17	metabolic process	cytoplasm	nucleotide binding;protein binding	Pf00118		TRIAE_CS42_6DL_TGACv1_526749_AA1691400			0	0.489	-1.03	0.00249577	0.0617991	9.97	21.5124	129	71	20.69	34.08	3	3	158.8	112	113.9	53.2	62.7	99.5
High	Master Protein	A0A1D6AJT8	Uncharacterized protein [OS=Triticum aestivum]	0	106.615	42	20	273	2	1	535	60	4.81	545	700	181.5	204	16	17	17	18	metabolic process	endoplasmic reticulum;membrane	metal ion binding;protein binding	Pf00262		TRIAE_CS42_6AS_TGACv1_488537_AA1575720			2	1.019	0.03	0.693287	0.983028	30.56	24.684	102	98	6.62	15.44	3	3	101.7	100.9	90.1	120.2	97	90.1
High	Master Protein	A0A1D6BLQ9	Uncharacterized protein [OS=Triticum aestivum]	0	106.6	69	18	253	3	1	337	35.6	5.21	643	716	186.11	197.06	16	16	18	18			catalytic activity	Pf00294		TRIAE_CS42_7AL_TGACv1_557023_AA1775330			0	0.799	-0.32	0.534598	0.960041	9.72	23.024	109.1	90.9	16.07	8.73	3	3	111.2	88.8	122.8	84.2	92.7	100.3
High	Master Protein	A0A1D5RY30	Uncharacterized protein [OS=Triticum aestivum]	0	106.391	60	19	233	4	1	478	52.5	8.32	628	824	145.2	183.35	18	18	18	18			catalytic activity	Pf01370		TRIAE_CS42_1AL_TGACv1_002594_AA0043390			14	1.264	0.34	0.179917	0.813216	30.25	26.4603	89.6	110.4	13.96	10.19	3	3	76.5	87.9	101.2	124.1	102	108.4
High	Master Protein	A0A1D5SIM8	Uncharacterized protein [OS=Triticum aestivum]	0	106.318	62	19	223	19	1	417	45.7	6.37	761	559	191.35	157.8	18	18	15	14	metabolic process		catalytic activity	Pf01764		TRIAE_CS42_1BL_TGACv1_041569_AA0148550			0	0.836	-0.26	0.408599	0.943753	15.89	26.957	110.4	89.6	4.99	8.6	3	3	109.2	100.9	110.9	102.2	88.6	88.2
High	Master Protein	A0A1D5SFH5	Serine hydroxymethyltransferase [OS=Triticum aestivum]	0	106.266	42	19	227	4	1	612	67.7	9.06	444	581	124.78	159.76	18	17	18	17	metabolic process		catalytic activity	Pf00155, Pf00464		TRIAE_CS42_1BL_TGACv1_032580_AA0131680			0	1.111	0.15	0.336223	0.940733	32.23	22.2739	94.1	105.9	22.18	8.59	3	3	93.2	75.3	117.4	113.5	95.6	104.9
High	Master Protein	A0A1D5WZW5	alanine--tRNA ligase [OS=Triticum aestivum]	0	105.663	32	21	246	1	1	968	105.3	6.62	819	741	187.78	170.67	19	19	20	19	metabolic process	cytoplasm;mitochondrion	catalytic activity;metal ion binding;nucleotide binding;RNA binding	Pf01411, Pf07973		TRIAE_CS42_4AL_TGACv1_288544_AA0951800			0	0.937	-0.09	0.853425	0.986776	7.67	21.6366	103.3	96.7	16.49	4.89	3	3	112.7	81.4	106.1	99.4	95.4	105.1
High	Master Protein	W5G718	Uncharacterized protein [OS=Triticum aestivum]	0	105.443	57	19	233	4	1	496	53	6.29	648	611	176.67	173.76	19	19	16	16	cellular homeostasis;metabolic process;regulation of biological process		antioxidant activity;catalytic activity;nucleotide binding	Pf00070, Pf02852, Pf03486, Pf07992, Pf13434		TRIAE_CS42_6AL_TGACv1_471081_AA1502320			15	0.871	-0.2	0.539945	0.960041	23.83	26.4802	111.2	88.8	0.64	14.07	3	3	107.3	107.9	108.7	106.9	86.1	83.1
High	Master Protein	A0A1D5VLD1	Uncharacterized protein [OS=Triticum aestivum]	0	105.431	43	17	192	2	1	508	58.2	9.29	621	692	137.49	173.92	14	13	17	17	metabolic process		catalytic activity;metal ion binding	Pf02915		TRIAE_CS42_3AS_TGACv1_212358_AA0700290			17	1.14	0.19	0.327851	0.940025	26.16	25.3469	92.9	107.1	14.8	8.76	3	3	87.7	112	87.2	114.7	101.1	97.3
High	Master Protein	A0A1D5YN81	Polyadenylate-binding protein [OS=Triticum aestivum]	0	105.188	38	17	214	13	1	651	70.7	7.37	603	546	167.45	165.35	16	16	16	16		cytoplasm	RNA binding	Pf00076, Pf00658, Pf13893, Pf14259		TRIAE_CS42_5AL_TGACv1_376712_AA1240200			5	0.953	-0.07	0.888671	0.990309	28.76	26.4452	101.9	98.1	3.95	8	3	3	108.2	102.9	100.1	87.5	99.1	102.1
High	Master Protein	W5GDS3	Uncharacterized protein [OS=Triticum aestivum]	0	105.052	58	16	250	1	1	397	41.1	8.22	734	1226	156.2	229.06	16	16	15	15			catalytic activity	Pf01370, Pf13460		TRIAE_CS42_6AS_TGACv1_485638_AA1549290			0
High	Master Protein	A0A1D6DFK9	beta-amylase [OS=Triticum aestivum]	0	105.025	49	17	238	17	1	503	56.6	5.43	691	574	178.64	190.53	16	16	17	17	metabolic process		catalytic activity	Pf01373		TRIAE_CS42_U_TGACv1_642373_AA2116470			0	1.004	0.01	0.891963	0.990309	31.68	25.979	100.1	99.9	18.54	25.99	3	3	120.4	86	91.8	130	91.7	80.1
High	Master Protein	W5H230	Uncharacterized protein [OS=Triticum aestivum]	0	104.855	42	20	265	2	1	535	60.1	4.81	558	701	182.73	193.95	16	17	17	18	metabolic process	endoplasmic reticulum;membrane	metal ion binding;protein binding	Pf00262		TRIAE_CS42_6DS_TGACv1_543414_AA1739700			0	0.95	-0.07	0.81972	0.985276	56.8	21.3305	105.6	94.4	13.2	15.93	3	3	118.5	109.7	91	98.2	105.6	76.9
High	Master Protein	A0A1D6BWG8	Uncharacterized protein [OS=Triticum aestivum]	0	104.754	59	21	205	21	1	594	63.2	6.55	508	755	142.56	196.26	20	20	19	18	metabolic process		catalytic activity	Pf00920		TRIAE_CS42_7AS_TGACv1_569990_AA1828200			0	1.113	0.15	0.501345	0.957414	26.17	25.8871	95.4	104.6	3.65	1.94	3	3	95.6	91.6	98.5	106.8	104.8	102.7
High	Master Protein	A0A1D6DC03	Uncharacterized protein [OS=Triticum aestivum]	0	104.657	40	14	282	6	1	544	60.6	9.01	461	623	172.78	208.8	13	13	14	14	metabolic process	cytoplasm	catalytic activity;nucleotide binding;RNA binding	Pf00009, Pf03143, Pf03144		TRIAE_CS42_U_TGACv1_641551_AA2097790			10	1.105	0.14	0.523346	0.957414	30.13	29.3489	94.8	105.2	1.39	8.59	3	3	94.9	96.3	97.6	110.5	93.6	106.9
High	Master Protein	A0A1D6DMC2	Uncharacterized protein [OS=Triticum aestivum]	0	104.166	62	17	277	3	1	353	39.7	5.41	742	873	193.26	219.77	14	14	16	16			nucleotide binding	Pf00004, Pf00910, Pf06309, Pf07724, Pf07728, Pf10431, Pf13177, Pf13191, Pf13401		TRIAE_CS42_U_TGACv1_697697_AA2162930			0	1.199	0.26	0.161508	0.793219	59.93	21.1775	99.2	100.8	30.41	27.8	3	3	135.6	100	73.2	101.7	68	121.4
High	Master Protein	A0A1D6AMM3	aspartate aminotransferase [OS=Triticum aestivum]	0	104.078	62	22	263	2	1	455	49.8	7.47	571	486	168.51	189.67	20	19	22	21	metabolic process		catalytic activity	Pf00155		TRIAE_CS42_6BL_TGACv1_499834_AA1592810			24	0.983	-0.02	0.97971	0.997576	28.38	27.5284	99.8	100.2	7.47	2.9	3	3	96.5	97.8	110.2	101.5	98.2	95.8
High	Master Protein	A0A1D6D5P5	Uncharacterized protein [OS=Triticum aestivum]	0	103.95	60	17	276	3	1	431	46.8	7.3	531	637	191.54	202	15	16	17	17	metabolic process		catalytic activity	Pf00056, Pf02866		TRIAE_CS42_7DS_TGACv1_624889_AA2063760			17	1.111	0.15	0.505041	0.957414	24.52	26.498	94.6	105.4	2.36	7.02	3	3	94.9	90.7	94	115.1	104.7	100.5
High	Master Protein	A0A1D5U063	D-3-phosphoglycerate dehydrogenase [OS=Triticum aestivum]	0	103.898	50	21	235	3	1	618	64	7.27	786	715	185.58	176.09	19	19	19	20	metabolic process		catalytic activity;nucleotide binding	Pf00208, Pf00389, Pf00670, Pf01842, Pf02826, Pf05221, Pf07991		TRIAE_CS42_2BL_TGACv1_130544_AA0413270			0	0.845	-0.24	0.73551	0.983028	18.34	21.7766	110.8	89.2	16.2	14.41	3	3	110.4	93.7	129.7	75.9	88.8	101.5
High	Master Protein	W5DIU6	Uncharacterized protein [OS=Triticum aestivum]	0	103.576	77	15	340	4	1	253	26.8	5.47	1151	1209	261.49	279.76	14	14	15	15	metabolic process;response to stimulus	cytosol;extracellular;membrane;mitochondrion;vacuole	catalytic activity;metal ion binding	Pf00121		TRIAE_CS42_3DS_TGACv1_271475_AA0899660			0	0.877	-0.19	0.566799	0.962	11.84	27.4021	110.5	89.5	8.96	2.58	3	3	111.9	115.3	97.1	90.6	94.6	90.4
High	Master Protein	A0A1D6D8N4	Uncharacterized protein [OS=Triticum aestivum]	0	103.369	37	22	218	1	1	988	110.2	6.28	745	576	156.47	178.63	20	19	20	20	metabolic process		catalytic activity;metal ion binding	Pf01433, Pf11940, Pf13485		TRIAE_CS42_U_TGACv1_640977_AA2081210			0	1.146	0.2	0.375051	0.943753	18.98	20.1519	88.6	111.4	22.23	12.75	3	3	76.1	89.8	117.2	112.9	114	90.1
High	Master Protein	A0A1D6CX50	Acyl-coenzyme A oxidase [OS=Triticum aestivum]	0	103.339	50	22	224	22	1	669	73.9	7.17	584	698	175.07	163.67	20	21	18	20	metabolic process		catalytic activity;nucleotide binding	Pf01756, Pf02770, Pf14749		TRIAE_CS42_7DS_TGACv1_621608_AA2020840			0	0.989	-0.02	0.955506	0.994922	23.69	26.1391	101.8	98.2	15.43	6.63	3	3	102.7	85.6	117	104.3	99.1	91.4
High	Master Protein	A0A1D6AQ51	Pyruvate dehydrogenase E1 component subunit alpha [OS=Triticum aestivum]	0	103.114	52	16	256	16	1	388	42.5	7.96	655	578	170.01	176.35	15	15	14	15	metabolic process		catalytic activity	Pf00676		TRIAE_CS42_6BL_TGACv1_500614_AA1607170			0	1.073	0.1	0.628084	0.980056	31.08	26.4538	97.9	102.1	3.93	6	3	3	94.7	102.2	97.3	108.3	96.1	101.5
High	Master Protein	W5GY37	aspartate aminotransferase [OS=Triticum aestivum]	0	102.923	66	21	252	1	1	456	49.8	7.2	566	477	162.55	183.73	19	18	21	20	metabolic process;response to stimulus	extracellular	catalytic activity	Pf00155		TRIAE_CS42_6DL_TGACv1_527835_AA1709100			0
High	Master Protein	A0A1D5ZIK8	Uncharacterized protein [OS=Triticum aestivum]	0	102.724	39	23	215	2	1	987	110.1	6.2	741	581	161.93	171.95	21	20	20	20	metabolic process		catalytic activity;metal ion binding	Pf01433, Pf11940, Pf13485		TRIAE_CS42_5DL_TGACv1_432935_AA1395040			0	1.115	0.16	0.295551	0.922441	21.55	21.0291	91.3	108.7	23.6	8.71	3	3	84.6	86.9	126.3	107.7	90.9	103.5
High	Master Protein	A0A1D5URU9	aminomethyltransferase [OS=Triticum aestivum]	0	102.52	63	16	236	1	1	340	36.6	8	709	704	176.44	199.74	15	15	15	15	metabolic process	mitochondrion	catalytic activity	Pf01571, Pf08669		TRIAE_CS42_2DL_TGACv1_160636_AA0552450			1	1.516	0.6	0.0168932	0.258825	30.34	23.6857	87.6	112.4	30.59	7.49	3	3	54.9	93.3	103.6	119.6	106.2	122.5
High	Master Protein	A0A1D5T6G0	Uncharacterized protein [OS=Triticum aestivum]	0	102.247	56	19	242	2	1	506	54.6	6.23	641	554	201.07	181.32	19	19	18	18	metabolic process		catalytic activity	Pf00171		TRIAE_CS42_2AL_TGACv1_093116_AA0272350			0	0.8	-0.32	0.599501	0.970428	15.53	22.1516	114.7	85.3	8.97	8.59	3	3	128.8	111.6	109.9	90.5	76.2	82.9
High	Master Protein	A0A077RX20	Uncharacterized protein [OS=Triticum aestivum]	0	102.238	26	24	222	24	1	1274	142.5	6.28	486	616	175.12	182.31	22	22	20	19	metabolic process;regulation of biological process	cytoplasm;membrane	catalytic activity;metal ion binding;nucleotide binding;protein binding	Pf00097, Pf00133, Pf05883, Pf08264, Pf09334, Pf10458, Pf12678, Pf12861, Pf13445, Pf13603, Pf13639, Pf13920, Pf13923, Pf14634, Pf15227					0	0.799	-0.32	0.389366	0.943753	21.76	24.9921	113.2	86.8	13.26	8.36	3	3	131.7	102	111	78	85.2	92.2
High	Master Protein	W5G105	Uncharacterized protein [OS=Triticum aestivum]	0	101.821	51	14	300	1	1	302	34.5	9.35	1169	965	241.54	196.45	14	14	14	14	metabolic process	ribosome	RNA binding;structural molecule activity	Pf00861, Pf14204		TRIAE_CS42_5DL_TGACv1_434449_AA1436200; TRIAE_CS42_5BL_TGACv1_404826_AA1312050			0	1.012	0.02	0.687925	0.983028	52.87	19.861	99.4	100.6	56.11	13.69	3	3	148.6	95.6	41.7	121.2	96.1	96.7
High	Master Protein	D3K4D8	ATP synthase subunit [OS=Triticum aestivum]	0	101.462	60	16	275	5	1	358	39.7	8.02	970	915	205.92	222.28	14	13	16	16	metabolic process;transport		catalytic activity;transporter activity	Pf00231	100359391		LOC100359391		16	1.35	0.43	0.0921385	0.658043	26.62	27.8111	87.5	112.5	7.38	14.3	3	3	76.8	87.7	87.5	134	112.6	101.4
High	Master Protein	A0A1D6CX75	Uncharacterized protein [OS=Triticum aestivum]	0	100.913	29	16	262	1	1	690	74.8	5.03	694	796	190.96	200.12	14	14	16	16	metabolic process	membrane	catalytic activity	Pf00251, Pf08244, Pf11837		TRIAE_CS42_7DS_TGACv1_621614_AA2021150			0	0.911	-0.13	0.984608	0.998471	14.54	22.6452	102.9	97.1	11.79	13.4	3	3	98.7	120.6	99	81.6	106.7	93.4
High	Master Protein	A0A1D5YCU2	Uncharacterized protein [OS=Triticum aestivum]	0	100.862	38	14	205	1	1	638	68.1	5.86	942	605	209.95	139.5	14	14	11	11	metabolic process		catalytic activity	Pf00933, Pf01915		TRIAE_CS42_5AL_TGACv1_374243_AA1194960			0
High	Master Protein	W5F2K0	Uncharacterized protein [OS=Triticum aestivum]	0	100.756	60	20	226	3	1	371	42	5.95	557	714	127.18	162.87	19	19	20	18	metabolic process		catalytic activity;nucleotide binding	Pf01073, Pf01370		TRIAE_CS42_5AL_TGACv1_375559_AA1223720			17	0.924	-0.11	0.765164	0.98358	21.51	26.9046	105.1	94.9	7.6	2.58	3	3	104.5	96.6	112.5	93.7	94.4	98.3
High	Master Protein	A0A1D5YJS8	Uncharacterized protein [OS=Triticum aestivum]	0	100.596	51	14	292	1	1	302	34.5	9.35	1067	893	237.35	185.12	14	14	13	13	metabolic process	ribosome	RNA binding;structural molecule activity	Pf00861, Pf14204		TRIAE_CS42_5AL_TGACv1_375669_AA1225350			17	0.937	-0.09	0.820614	0.985276	30.14	28.1394	102	98	5.37	3.67	3	3	101.7	107.9	97	94.2	101.4	97.7
High	Master Protein	A0A1D5Y6L8	Uncharacterized protein [OS=Triticum aestivum]	0	100.594	39	18	230	18	1	662	73.8	6.39	479	762	157.6	161.5	18	18	18	18	metabolic process			Pf01964, Pf13667		TRIAE_CS42_4DS_TGACv1_361374_AA1166440			0	1.312	0.39	0.124147	0.732788	21.64	26.2366	88.7	111.3	10.95	6.31	3	3	80.5	99.4	86.2	108.1	119.4	106.5
High	Master Protein	W5A332	Uncharacterized protein [OS=Triticum aestivum]	0	100.478	55	17	226	2	1	478	52.5	8.32	646	797	147.44	173.4	17	17	16	16	cell communication;metabolic process;response to stimulus		catalytic activity;metal ion binding	Pf01370		TRIAE_CS42_U_TGACv1_643213_AA2129070			0	1.328	0.41	0.0589375	0.523291	25.42	21.1864	72.1	127.9	34.79	4.17	3	3	57.6	68	109.1	127.2	117.2	120.8
High	Master Protein	A0A1D5TP30	Uncharacterized protein [OS=Triticum aestivum]	0	99.867	65	21	244	1	1	496	53	6.83	541	520	175.7	190.29	19	18	21	20	metabolic process		catalytic activity	Pf00171		TRIAE_CS42_2AS_TGACv1_113589_AA0358260			0	0.912	-0.13	0.859014	0.986776	77.23	18.4439	104.6	95.4	88.4	1.73	3	2	273.7	102.2	37.9	92		94.3
High	Master Protein	A0A1D6CYZ3	Uncharacterized protein [OS=Triticum aestivum]	0	99.832	57	18	219	13	1	466	51.1	5.07	586	584	178	178.96	17	18	17	16	metabolic process		catalytic activity	Pf00160		TRIAE_CS42_7DS_TGACv1_621977_AA2030590			6	1.168	0.22	0.354075	0.942528	29.9	26.8337	93.8	106.2	14.85	10.17	3	3	99	101.2	76.4	112.2	115.9	95.3
High	Master Protein	A0A1D6DKZ7	Uncharacterized protein [OS=Triticum aestivum]	0	99.8	57	16	258	2	1	431	46.6	7.59	547	554	183.13	184.66	14	14	16	16	metabolic process		catalytic activity	Pf00056, Pf02866		TRIAE_CS42_U_TGACv1_645264_AA2143770			0	1.148	0.2	0.217973	0.872664	28.57	21.6333	88.8	111.2	3.89	19.47	3	3	83.6	90.3	86.5	108.2	137.3	94.1
High	Master Protein	A0A1D5WDE2	Uncharacterized protein [OS=Triticum aestivum]	0	99.795	44	15	298	2	1	393	42.1	6.57	1041	1100	215.07	274.82	15	13	14	14	metabolic process		catalytic activity	Pf00316		TRIAE_CS42_3DL_TGACv1_249217_AA0841740			17	1.43	0.52	0.0468031	0.492796	26.8	28.9338	85	115	13.11	11.25	3	3	71	82.2	92.4	133.4	109.8	111.2
High	Master Protein	W4ZSC8	Uncharacterized protein [OS=Triticum aestivum]	0	99.623	62	15	264	2	1	395	42.2	9.17	1149	1020	212.65	207.17	15	15	15	15	metabolic process		catalytic activity	Pf00106, Pf01370, Pf08659		TRIAE_CS42_1AL_TGACv1_000279_AA0007970			16	1.165	0.22	0.361233	0.943753	41.33	27.125	93.6	106.4	7.26	8.76	3	3	90.6	102.7	90.9	115.3	97.2	103.3
High	Master Protein	A0A1D6RUS0	Uncharacterized protein [OS=Triticum aestivum]	0	99.45	42	19	217	7	1	622	67.3	6.87	544	491	176.03	156.67	16	17	17	17	metabolic process			Pf00330		TRIAE_CS42_3DS_TGACv1_273371_AA0930690			0	1.094	0.13	0.428346	0.945676	22.24	23.747	97	103	9.45	6.14	3	3	102.5	96.5	84.9	102.5	112.8	100.8
High	Master Protein	W5DAV1	Uncharacterized protein [OS=Triticum aestivum]	0	99.388	57	21	207	2	1	505	57.4	6.48	374	445	142.09	172.91	16	16	21	21	metabolic process	cytoplasm	catalytic activity;nucleotide binding	Pf00587, Pf03129, Pf09180		TRIAE_CS42_3DL_TGACv1_251038_AA0876480			0	1.214	0.28	0.146897	0.782706	27	22.0383	98.7	101.3	19.72	8.57	3	3	75.1	97.4	112.4	115.4	100	99.7
High	Master Protein	A0A1D6BXL7	ferredoxin--NADP reductase [OS=Triticum aestivum]	0	99.334	61	17	259	6	1	361	39.8	8.27	746	899	194.41	222	16	16	17	17	metabolic process		catalytic activity	Pf00175, Pf00667, Pf00970		TRIAE_CS42_7AS_TGACv1_570343_AA1834140			6	1.582	0.66	0.0118308	0.204	28.21	27.0779	74.7	125.3	11.31	9.21	3	3	73.5	88	72.1	132.7	123.4	110.3
High	Master Protein	A0A1D5U388	proliferating cell nuclear antigen [OS=Triticum aestivum]	0	99.224	60	11	261	11	1	277	30.8	4.84	787	739	200.05	194.85	11	11	11	11	metabolic process;regulation of biological process	nucleus	DNA binding;enzyme regulator activity	Pf00705, Pf02747		TRIAE_CS42_2BL_TGACv1_131506_AA0428640			0	0.891	-0.17	0.622525	0.979492	25.41	26.8454	111.4	88.6	12.71	7.3	3	3	118.4	92.7	114.3	85.1	91	98.5
High	Master Protein	W5G255	MBD6-5DS [OS=Triticum aestivum]	0	99.189	67	19	202	11	1	420	43.6	4.54	617	585	188.18	135.13	18	18	12	12		nucleus	DNA binding	Pf01429		TRIAE_CS42_5DS_TGACv1_457248_AA1484250			9	0.595	-0.75	0.00972616	0.174659	14.38	25.6602	123.9	76.1	25.97	23.67	3	3	161.4	116.8	98	58.5	71.8	93.5
High	Master Protein	D8L9G3	Sedoheptulose-1,7-bisphosphatase, chloroplast, expressed [OS=Triticum aestivum]	0	99.182	44	14	294	1	1	393	42.1	6.57	1022	1111	207.52	276.6	14	12	14	14	defense response;metabolic process;response to stimulus	extracellular	catalytic activity	Pf00316		TRIAE_CS42_3B_TGACv1_228003_AA0825490			0	0.888	-0.17	0.928963	0.992737	59.72	19.6276	96.9	103.1	30	52.8	2	3	105.6	162.4		43.4	139.3	149.3
High	Master Protein	A0A1D6A291	Uncharacterized protein [OS=Triticum aestivum]	0	99.118	55	15	240	7	1	384	43	5.62	520	804	156.47	202.66	12	12	15	15			nucleotide binding	Pf00004, Pf07724, Pf07728, Pf10431, Pf13177, Pf13401		TRIAE_CS42_5DS_TGACv1_457123_AA1482660			0	1.252	0.32	0.15519	0.792321	36.54	23.7789	89.5	110.5	8.13	10.23	3	3	95.7	89.8	81.3	122.5	99.8	110.9
High	Master Protein	A0A1D5SI65	glycosyltransferase [OS=Triticum aestivum]	0	99.078	63	23	246	23	1	451	49.4	5.19	606	546	181.18	163.22	21	21	17	17	metabolic process		catalytic activity	Pf00201		TRIAE_CS42_1BL_TGACv1_034556_AA0144850			0	0.791	-0.34	0.263956	0.900872	15.65	27.062	112.9	87.1	15.75	10.76	3	3	133.1	98.4	108.7	97	83.8	79
High	Master Protein	A0A1D6B8P0	acetolactate synthase [OS=Triticum aestivum]	0	98.93	44	17	198	17	1	644	69.3	7.06	505	470	154.15	163.73	14	13	16	15	metabolic process		catalytic activity;metal ion binding;nucleotide binding	Pf00205, Pf02775, Pf02776		TRIAE_CS42_6DL_TGACv1_527727_AA1708000			0	1.019	0.03	0.701343	0.983028	28.45	25.0112	91.3	108.7	14.65	5.67	3	3	88.8	86.2	111.6	98	105.8	109.6
High	Master Protein	A0A1D5SF10	Uncharacterized protein [OS=Triticum aestivum]	0	98.71	22	21	191	6	1	1421	155.2	5.38	420	469	134.33	163.73	18	19	20	20	metabolic process		catalytic activity	Pf00586, Pf02769, Pf13507		TRIAE_CS42_1BL_TGACv1_032427_AA0129740			13	1.052	0.07	0.586524	0.970069	20.18	24.8966	101.2	98.8	8.46	11.94	3	3	94.9	95.5	109.8	113.7	92.9	93.2
High	Master Protein	A0A1D6SE59	Uncharacterized protein [OS=Triticum aestivum]	0	98.647	53	19	210	1	1	552	59.4	6.86	905	723	161.86	173.15	18	18	14	15	metabolic process		catalytic activity	Pf00171, Pf05893		TRIAE_CS42_7BS_TGACv1_591840_AA1923230			0	1.082	0.11	0.443747	0.948752	18.16	20.5026	98.4	101.6	16.41	12.39	3	3	98.3	78.7	109.6	118.7	101.4	93.3
High	Master Protein	A0A0C4BJH4	Uncharacterized protein [OS=Triticum aestivum]	0	98.465	71	17	334	3	1	266	29.4	4.83	883	1024	275.73	237.61	16	16	17	17			protein binding	Pf00244		TRIAE_CS42_4AS_TGACv1_306907_AA1014900			0	0.774	-0.37	0.478439	0.957414	14.8	22.6243	108.6	91.4	13.17	9.65	3	3	114.6	91.7	117.8	81.7	97.7	96.5
High	Master Protein	A0A1D6RY87	alanine--tRNA ligase [OS=Triticum aestivum]	0	97.964	25	19	226	5	1	1018	111	6.49	849	574	183.49	146.32	18	18	17	16	metabolic process	cytoplasm;mitochondrion	catalytic activity;metal ion binding;nucleotide binding;RNA binding	Pf01411, Pf07973		TRIAE_CS42_4BS_TGACv1_327859_AA1076660			1	0.922	-0.12	0.995526	0.999395	23.75	22.9161	104.3	95.7	10.41	7.76	3	3	91.1	110.4	109	99.9	87.9	101.7
High	Master Protein	A0A1D5VI10	Uncharacterized protein [OS=Triticum aestivum]	0	97.727	41	21	195	1	1	724	78.9	8.5	215	147	141.85	125.08	20	20	15	15	metabolic process		catalytic activity	Pf00378, Pf00725, Pf02737		TRIAE_CS42_3AS_TGACv1_211082_AA0684760			23	0.844	-0.24	0.51408	0.957414	23.14	25.4555	108.5	91.5	18.94	9.35	3	3	103.6	93.3	133.4	87.4	83	99.3
High	Master Protein	P24065	Photosystem II CP47 reaction center protein [OS=Triticum aestivum]	0	97.718	48	13	224	13	1	508	56.1	6.54	735	645	190.6	219.22	13	12	12	12	metabolic process	membrane		Pf00421	803181		psbB		0	1.154	0.21	0.386901	0.943753	29.43	26.7337	95	105	12.01	10.47	3	3	78.1	97.2	96.7	106.9	99.3	121.8
High	Master Protein	A0A1D5XTW4	Uncharacterized protein [OS=Triticum aestivum]	0	97.57	70	20	262	5	1	435	46.3	5.36	625	892	194.05	230.18	17	16	19	19	metabolic process		catalytic activity;nucleotide binding	Pf00070, Pf04820, Pf07992		TRIAE_CS42_4BS_TGACv1_329408_AA1100960			15	0.941	-0.09	0.836546	0.986776	22.6	27.1525	106.2	93.8	10.99	1.31	3	3	106.2	93.9	117.1	93.8	95.6	93.3
High	Master Protein	W5DZD4	Uncharacterized protein [OS=Triticum aestivum]	0	97.53	56	19	185	1	1	525	57.2	6.02	651	368	166.78	139.74	17	17	15	14	metabolic process	cytoplasm	nucleotide binding;protein binding	Pf00118		TRIAE_CS42_4AS_TGACv1_307431_AA1020380			19	0.768	-0.38	0.29668	0.922441	19.28	25.3055	114.1	85.9	12.6	16.18	3	3	130.8	105.1	106.9	75.3	80.4	101.5
High	Master Protein	A0A1D5WU90	Uncharacterized protein [OS=Triticum aestivum]	0	97.436	41	21	203	1	1	724	79.1	8.43	229	148	148.26	132.3	20	20	16	16	metabolic process		catalytic activity	Pf00378, Pf00725, Pf02737		TRIAE_CS42_3DS_TGACv1_272448_AA0920810			0	0.986	-0.02	0.773788	0.98358	20.3	19.8386	100.7	99.3	25.08	1.39	3	3	120.3	71.7	103.3	101.9	102.8	100
High	Master Protein	A0A1D6AS14	Uncharacterized protein [OS=Triticum aestivum]	0	97.311	56	15	270	15	1	287	31.8	5.63	648	810	176.34	214.17	14	14	15	15	metabolic process	cytoplasm	catalytic activity;metal ion binding	Pf00719		TRIAE_CS42_6BL_TGACv1_501315_AA1615950			0	1.118	0.16	0.486098	0.957414	24.09	28.4825	99.5	100.5	10.11	5.54	3	3	104.2	101.5	86	108.6	102.5	97.2
High	Master Protein	Q8W0Q1	putative aldehyde dehydrogenase WIS1 [OS=Triticum aestivum]	0	97.303	60	21	219	3	1	551	61	7.52	490	467	165.39	147.88	19	20	20	20	metabolic process;response to stimulus	mitochondrion	catalytic activity;metal ion binding	Pf00171, Pf03220	542890	TRIAE_CS42_1DL_TGACv1_061726_AA0202480	wis1		17	0.858	-0.22	0.562116	0.962	17.57	25.5924	108	92	4.57	10.67	3	3	115.1	106.3	106.6	100.3	90.7	81
High	Master Protein	A0A1D5VDW6	aspartate aminotransferase [OS=Triticum aestivum]	0	97.008	50	19	200	1	1	455	49.6	8.47	668	640	153.76	140.22	16	16	16	16	metabolic process		catalytic activity	Pf00155		TRIAE_CS42_3AL_TGACv1_196342_AA0659660			21	0.872	-0.2	0.545595	0.960298	24.34	26.3095	103.9	96.1	7.51	1.85	3	3	102.5	99.5	114.4	96.1	92.7	94.8
High	Master Protein	A0A1D5ZV82	Uncharacterized protein [OS=Triticum aestivum]	0	96.929	33	16	220	3	1	681	73.7	8.35	771	638	184.4	167.07	16	16	14	13	metabolic process	membrane	catalytic activity	Pf00933, Pf01915		TRIAE_CS42_5DL_TGACv1_435277_AA1448280			6	0.896	-0.16	0.848877	0.986776	15.05	24.4207	106.7	93.3	11.82	8.46	3	3	114.6	90.9	109.2	95.4	103	86.9
High	Master Protein	A0A1D6BMF2	Uncharacterized protein [OS=Triticum aestivum]	0	96.739	45	20	212	2	1	714	80.3	5.47	444	486	135.01	137.94	18	19	18	18	metabolic process		catalytic activity	Pf00326, Pf02897		TRIAE_CS42_7AL_TGACv1_557227_AA1778420			0	0.879	-0.19	0.940935	0.993226	24.35	21.0957	105.6	94.4	21.2	4.96	3	3	106.2	82.6	127.2	99.3	89.9	94.9
High	Master Protein	W5ABE0	Uncharacterized protein [OS=Triticum aestivum]	0	96.728	50	21	190	2	1	602	65.3	5.83	509	480	132.42	142.19	19	17	20	20	cell organization and biogenesis;metabolic process	membrane	catalytic activity;protein binding	Pf00089, Pf10459, Pf13180, Pf13365		TRIAE_CS42_1BS_TGACv1_050305_AA0170380			0	0.697	-0.52	0.203569	0.855343	11.89	21.4429	122.1	77.9	8.34	24.06	3	3	121.3	119.1	103.7	71.1	76	108.8
High	Master Protein	A0A1D5UIJ5	Uncharacterized protein [OS=Triticum aestivum]	0	96.64	55	19	223	2	1	506	54.6	6.07	636	527	197.04	169.07	19	19	16	16	metabolic process		catalytic activity	Pf00171		TRIAE_CS42_2DL_TGACv1_158317_AA0515430			17	0.752	-0.41	0.167826	0.798849	14.35	26.1613	112.5	87.5	6.46	9.63	3	3	111.8	107.6	121.9	94.2	86.9	77.6
High	Master Protein	A0A1D6RSH3	Uncharacterized protein [OS=Triticum aestivum]	0	96.633	61	14	227	2	1	356	38.7	6.24	586	550	160.92	181.38	14	14	14	14	metabolic process		catalytic activity;protein binding	Pf00891, Pf08100		TRIAE_CS42_3DL_TGACv1_249256_AA0843350			0	0.948	-0.08	0.815452	0.985276	27.09	21.4083	103.2	96.8	24.37	16.87	3	3	86.6	92.5	133.2	86.4	86.7	114.6
High	Master Protein	W5AL59	Uncharacterized protein [OS=Triticum aestivum]	0	96.605	50	21	195	1	1	601	65.3	5.83	541	496	138.77	146.15	19	17	20	20	cell organization and biogenesis;metabolic process	membrane	catalytic activity;protein binding	Pf00089, Pf10459, Pf13180, Pf13365		TRIAE_CS42_1DS_TGACv1_081586_AA0261700			19	0.852	-0.23	0.544268	0.960298	28.17	25.4859	107	93	19.43	20.58	3	3	93.2	97.5	131.2	84.6	79	114.5
High	Master Protein	A0A1D5SCA9	Uncharacterized protein [OS=Triticum aestivum]	0	95.913	53	14	264	1	1	430	45.9	9.39	1188	1123	213.57	210.08	14	14	14	14	metabolic process		catalytic activity	Pf00106, Pf01370, Pf08659		TRIAE_CS42_1BL_TGACv1_031645_AA0117810			0	1.229	0.3	0.168757	0.798914	13.33	24.1547	86	114	15.08	10.78	3	3	104.9	82	81.2	123.4	108.7	99.8
High	Master Protein	W5H174	Uncharacterized protein [OS=Triticum aestivum]	0	95.834	49	17	215	2	1	496	53	6.47	542	572	154.27	173.68	17	17	16	16	cellular homeostasis;metabolic process;regulation of biological process		antioxidant activity;catalytic activity;nucleotide binding	Pf00070, Pf02852, Pf03486, Pf07992, Pf13434		TRIAE_CS42_6DL_TGACv1_526737_AA1691050			0	0.767	-0.38	0.329735	0.940733	16.68	24.4016	98	102	23.46	17.4	3	3	83.8	92.6	128.8	116.2	82.2	96.3
High	Master Protein	A0A1D5SCW4	6-phosphogluconate dehydrogenase, decarboxylating [OS=Triticum aestivum]	0	95.706	59	18	211	5	1	501	53.9	5.87	739	779	192.44	187.84	17	16	16	17	metabolic process		catalytic activity	Pf00393, Pf03446		TRIAE_CS42_1BL_TGACv1_031793_AA0120640			11	1.005	0.01	0.746243	0.983136	23.01	24.6988	101.5	98.5	0.72	1.22	3	3	102.4	101.3	101	98.2	97.4	99.8
High	Master Protein	H6UV52	allene oxide synthase [OS=Triticum aestivum]	0	95.501	55	19	237	2	1	423	46.9	8.48	686	545	172.99	160.56	18	19	18	18	metabolic process		catalytic activity;metal ion binding	Pf00067					2	0.646	-0.63	0.0751038	0.595957	10.75	23.588	117.9	82.1	2.44	10.79	3	3	117.8	118.8	123.3	82.8	70.4	86.9
High	Master Protein	A0A1D5WF58	aspartate aminotransferase [OS=Triticum aestivum]	0	95.353	50	19	192	1	1	455	49.6	8.15	647	605	146.17	138.88	16	16	16	16	metabolic process		catalytic activity	Pf00155		TRIAE_CS42_3DL_TGACv1_249494_AA0850030			0	0.909	-0.14	0.944917	0.994243	18.65	20.8455	102.7	97.3	13.5	22.54	3	3	90.1	111.1	117.5	106.8	69.4	105.2
High	Master Protein	W5EM06	Uncharacterized protein [OS=Triticum aestivum]	0	95.288	55	18	226	1	1	461	50	7.96	961	901	194.78	186.47	18	18	16	17	metabolic process		catalytic activity	Pf00155, Pf04864		TRIAE_CS42_4DL_TGACv1_344240_AA1145330			0	1.093	0.13	0.311262	0.93032	11.94	21.6435	95.6	104.4	15.5	10.31	3	3	90.4	83.7	112	117.1	97.9	98.9
High	Master Protein	A0A1D5TM13	Pyruvate dehydrogenase E1 component subunit alpha [OS=Triticum aestivum]	0	95.249	56	18	251	18	1	421	45.9	6.84	625	641	204.05	189.53	18	18	16	16	metabolic process		catalytic activity	Pf00676, Pf02775		TRIAE_CS42_2AS_TGACv1_112938_AA0348140			0	1.055	0.08	0.693518	0.983028	35.16	26.5715	93.8	106.2	8.47	1.96	3	3	85.7	94.3	101.6	103.8	106.7	107.9
High	Master Protein	W4ZVZ8	Uncharacterized protein [OS=Triticum aestivum]	0	94.957	50	21	185	1	1	600	65.2	6.02	343	348	120.39	132.75	19	17	20	20	cell organization and biogenesis;metabolic process	membrane	catalytic activity;protein binding	Pf00089, Pf10459, Pf13180, Pf13365		TRIAE_CS42_1AS_TGACv1_019131_AA0061100			0	0.748	-0.42	0.376389	0.943753	6.07	21.4751	112.1	87.9	14.21	8.6	3	3	105	133.9	106.3	78.6	83.3	92.9
High	Master Protein	W5FHI0	Uncharacterized protein [OS=Triticum aestivum]	0	94.816	58	19	213	2	1	371	42	5.95	402	589	113.35	155.47	18	18	19	17	metabolic process		catalytic activity;nucleotide binding	Pf01073, Pf01370		TRIAE_CS42_5BL_TGACv1_404629_AA1306770			0	0.785	-0.35	0.487954	0.957414	19.43	21.7055	113.1	86.9	3.39	6.14	3	3	116.2	111.1	108.7	85.5	84.3	94.2
High	Master Protein	W5GCU0	Uncharacterized protein [OS=Triticum aestivum]	0	94.749	63	14	218	2	1	360	38.5	5.97	430	548	169.4	170.82	14	14	13	13	metabolic process		catalytic activity;metal ion binding	Pf00107, Pf08240		TRIAE_CS42_6AS_TGACv1_486200_AA1558100			14	0.834	-0.26	0.506218	0.957414	22.76	25.1236	108.3	91.7	10.24	9.6	3	3	113.2	95.6	116	95.9	81.6	97.7
High	Master Protein	A0A1D5V0G2	Uncharacterized protein [OS=Triticum aestivum]	0	94.718	28	19	197	3	1	1031	112.1	5.26	717	546	167.56	143.67	19	19	15	15			protein binding	Pf00400, Pf02948, Pf03154, Pf05109, Pf07223, Pf08801, Pf09606, Pf09770, Pf12931, Pf14179		TRIAE_CS42_2DS_TGACv1_178438_AA0595580			16	0.867	-0.21	0.662408	0.983028	22.49	24.9139	111.8	88.2	9.64	13.37	3	3	111.4	94.3	112.7	87.8	85.5	108.3
High	Master Protein	A0A1D5TRU3	Uncharacterized protein [OS=Triticum aestivum]	0	94.446	36	17	176	4	1	789	88.8	5.99	489	315	148.01	113.26	16	16	14	14	metabolic process;regulation of biological process	cytoplasm	catalytic activity;nucleotide binding	Pf00133, Pf01406, Pf08264, Pf09334		TRIAE_CS42_2AS_TGACv1_115256_AA0371670			1	1	0	0.67103	0.983028	25.13	22.473	103.1	96.9	15.84	5.47	3	3	100.7	91	123.4	94.6	90	100.4
High	Master Protein	A0A1D5XDV1	Uncharacterized protein [OS=Triticum aestivum]	0	94.409	54	18	221	1	1	464	50.3	8.12	961	884	194.39	179.74	18	18	16	16	metabolic process		catalytic activity	Pf00155, Pf04864		TRIAE_CS42_4AS_TGACv1_308016_AA1025250			17	1.062	0.09	0.666794	0.983028	22.13	27.6162	98.5	101.5	8.84	5.42	3	3	89.3	97.2	106.6	108.6	100.3	98.1
High	Master Protein	A0A1D5YPG2	malate dehydrogenase [OS=Triticum aestivum]	0	94.356	71	14	204	12	1	357	37.2	8.18	704	772	154.97	195.29	11	12	14	14	metabolic process		catalytic activity	Pf00056, Pf02866		TRIAE_CS42_5AL_TGACv1_377311_AA1245830			2	1.47	0.56	0.0329312	0.402052	22.78	27.0884	85.1	114.9	10.29	5.29	3	3	72.8	86.3	88.4	124.2	111.9	116.5
High	Master Protein	W5E0L9	Uncharacterized protein [OS=Triticum aestivum]	0	94.248	59	15	189	2	1	376	39.8	8.38	686	643	157.61	160.89	15	15	13	13	metabolic process		catalytic activity	Pf00698		TRIAE_CS42_4AS_TGACv1_306673_AA1011900			12	1.054	0.08	0.574706	0.965629	29.42	25.3008	95.5	104.5	14.98	5.98	3	3	81.7	93.4	110	102.2	100.6	112.2
High	Master Protein	A0A1D5ZBF2	Alpha-mannosidase [OS=Triticum aestivum]	0	94.231	31	21	198	8	1	1018	113.7	6.09	362	439	140.14	152.97	20	20	20	20	metabolic process		catalytic activity;metal ion binding	Pf01074, Pf07748, Pf09261		TRIAE_CS42_5BL_TGACv1_407293_AA1355500			13	1.029	0.04	0.675588	0.983028	23.84	25.2476	101.5	98.5	4.03	12.86	3	3	93.3	98.9	100.8	117.5	93.6	95.9
High	Master Protein	A0A1D5Y508	Uncharacterized protein [OS=Triticum aestivum]	0	94.213	74	20	229	2	1	435	46.3	5.36	610	781	167.28	188.53	18	17	18	18	metabolic process		catalytic activity;nucleotide binding	Pf00070, Pf04820, Pf07992		TRIAE_CS42_4DS_TGACv1_360999_AA1158060			3	0.949	-0.08	0.956128	0.994922	33.78	24.7422	106.5	93.5	9.54	7.35	3	3	111.4	93.1	109.2	88.3	102.3	95.8
High	Master Protein	A0A1D5Z0H6	Uncharacterized protein [OS=Triticum aestivum]	0	94.167	37	15	209	2	1	638	68.3	5.76	990	650	195.82	146.61	15	15	13	13	metabolic process		catalytic activity	Pf00933, Pf01915		TRIAE_CS42_5BL_TGACv1_404561_AA1304210			1	0.511	-0.97	0.0121468	0.207249	10.95	22.7537	130.3	69.7	27.17	35.04	3	3	173.2	130.6	100.4	69.9	85.5	40.4
High	Master Protein	W5AXT4	Uncharacterized protein [OS=Triticum aestivum]	0	94.03	70	20	231	1	1	391	43.4	7.46	343	361	149.08	159.3	19	19	19	19	metabolic process		catalytic activity	Pf01218		TRIAE_CS42_2AL_TGACv1_093085_AA0271530			0	1.302	0.38	0.156244	0.792321	19.21	23.2108	86.9	113.1	25.04	5.43	3	3	73	82.5	116.2	116.1	107.4	104.8
High	Master Protein	A0A1D6AVR0	Uncharacterized protein [OS=Triticum aestivum]	0	93.947	42	19	212	19	1	557	60	6.64	807	879	180.75	156.33	19	19	16	16	metabolic process	cytoplasm	nucleotide binding;protein binding	Pf00118		TRIAE_CS42_6BS_TGACv1_513357_AA1638810			0	0.82	-0.29	0.393476	0.943753	20.89	25.7006	113.7	86.3	7.43	8.96	3	3	119.8	103.2	111.5	84.6	83.2	97.6
High	Master Protein	A0A077RSQ1	Uncharacterized protein [OS=Triticum aestivum]	0	93.898	39	20	198	1	1	724	79.1	8.43	205	147	141.02	129.11	19	19	15	15	metabolic process		catalytic activity	Pf00378, Pf00725, Pf02737		TRIAE_CS42_3B_TGACv1_222728_AA0769620			0	0.856	-0.22	0.822807	0.985276	22.21	20.6519	107.8	92.2	25.71	15.29	3	3	110.5	82.1	138.9	94.5	74	99.9
High	Master Protein	A0A1D6BGW9	Delta-aminolevulinic acid dehydratase [OS=Triticum aestivum]	0	93.816	62	16	213	11	1	454	49.5	7.83	835	895	167.86	170.62	15	15	16	15	metabolic process		catalytic activity;metal ion binding	Pf00490		TRIAE_CS42_6DS_TGACv1_544551_AA1748770			0	1.061	0.09	0.543404	0.960246	50.55	24.8604	113.1	86.9	30.93	3.47	3	3	118	137	71.5	90.7	94.5	88.3
High	Master Protein	A0A1D6BTZ7	glycosyltransferase [OS=Triticum aestivum]	0	93.713	49	18	202	4	1	456	49.5	5.44	682	513	146.57	126.8	17	16	14	14	metabolic process		catalytic activity	Pf00201		TRIAE_CS42_7AS_TGACv1_569469_AA1816780			15	0.674	-0.57	0.0509155	0.513353	16.6	26.2695	118.6	81.4	18.19	6.84	3	3	124.6	89.7	126.1	85.6	81.2	92.9
High	Master Protein	W5FRF1	Uncharacterized protein [OS=Triticum aestivum]	0	93.675	52	15	286	2	1	326	33.7	9.51	902	889	196.69	238.47	13	13	15	15	metabolic process;regulation of biological process	cytoplasm	metal ion binding;nucleotide binding	Pf00166		TRIAE_CS42_5DL_TGACv1_434411_AA1435400			12	1.039	0.06	0.751794	0.983136	24.44	29.3061	107.9	92.1	19.83	10.54	3	3	112.6	110.4	77.2	93.7	112.1	94.1
High	Master Protein	A0A077RTG8	malate dehydrogenase [OS=Triticum aestivum]	0	93.478	67	14	210	12	1	340	35.4	8.37	706	722	169.67	165.57	12	11	14	14	metabolic process		catalytic activity	Pf00056, Pf01073, Pf02056, Pf02866		TRIAE_CS42_3B_TGACv1_223879_AA0788930			1	0.946	-0.08	0.860736	0.986776	23.08	26.9516	100.1	99.9	12.74	9.95	3	3	93.6	115.8	93.4	110.5	93.3	93.5
High	Master Protein	A0A1D6BTI3	Uncharacterized protein [OS=Triticum aestivum]	0	93.43	43	18	183	2	1	622	68.3	7.87	478	562	123.95	153.8	16	17	14	15	metabolic process	cytoplasm	nucleotide binding;protein binding	Pf00118		TRIAE_CS42_7AS_TGACv1_569369_AA1814420			21	0.804	-0.31	0.408328	0.943753	18.21	25.2362	118.2	81.8	14.78	11.32	3	3	128.5	95.5	117.5	79.9	81.3	97.4
High	Master Protein	A0A1D5U2T4	Uncharacterized protein [OS=Triticum aestivum]	0	93.393	75	21	237	2	1	391	43.5	7.46	342	385	153.55	168.7	19	19	19	20	metabolic process		catalytic activity	Pf01218		TRIAE_CS42_2BL_TGACv1_131360_AA0426660			17	1.176	0.23	0.33648	0.940733	27.07	27.3498	90.8	109.2	9.47	10.01	3	3	85.5	101.6	88.1	105.9	120.1	98.9
High	Master Protein	A0A1D5ZX13	Uncharacterized protein [OS=Triticum aestivum]	0	93.392	45	17	197	3	1	624	67.3	7.69	672	686	156.61	161.35	15	16	15	15	metabolic process		catalytic activity	Pf00933, Pf01915		TRIAE_CS42_5DL_TGACv1_435861_AA1455710			13	1.135	0.18	0.351832	0.942528	28.95	25.5902	92.8	107.2	10.56	8.49	3	3	89.9	84.5	103.5	117.7	103.8	100.6
High	Master Protein	A0A1D5VYP5	Uncharacterized protein [OS=Triticum aestivum]	0	93.367	48	16	177	1	1	451	51.8	8.95	607	642	130.5	153.81	13	13	16	16	metabolic process		catalytic activity;metal ion binding	Pf02915		TRIAE_CS42_3B_TGACv1_222428_AA0764350			0	0.782	-0.35	0.734774	0.983028	0	18.568	112.2	87.8			1	1			336.7	263.3
High	Master Protein	A0A1D5ZEQ5	Uncharacterized protein [OS=Triticum aestivum]	0	93.267	50	16	219	4	1	502	55.5	6.89	812	666	195.91	180.68	16	16	16	16	cell organization and biogenesis;metabolic process		catalytic activity;protein binding	Pf00150		TRIAE_CS42_5BS_TGACv1_423277_AA1373020			0	0.616	-0.7	0.0389122	0.441958	6.58	23.8361	125.3	74.7	10.23	14.96	3	3	106	126.4	128.2	75.3	93.3	70.8
High	Master Protein	W5H2V3	Uncharacterized protein [OS=Triticum aestivum]	0	93.231	37	17	268	2	1	598	63.6	5.78	961	806	225.49	231.15	17	17	16	16	metabolic process	cytoplasm	nucleotide binding	Pf00118		TRIAE_CS42_6DS_TGACv1_542775_AA1730070			5	0.83	-0.27	0.634924	0.980056	17.33	23.1695	109.8	90.2	3.63	2.55	3	3	114.9	107.4	108.5	89.2	87.7	92.2
High	Master Protein	A0A1D6B465	Uncharacterized protein [OS=Triticum aestivum]	0	93.221	52	15	197	2	1	417	45.4	6.35	477	364	150.2	144.2	14	14	15	14	metabolic process	cytoplasm	catalytic activity	Pf01180		TRIAE_CS42_6DL_TGACv1_526545_AA1686890			13	0.948	-0.08	0.866513	0.987526	19.89	26.2141	105.3	94.7	6.35	4.45	3	3	109.6	96.8	106.2	95.5	100.2	91.7
High	Master Protein	A0A1D5U5B0	aminomethyltransferase [OS=Triticum aestivum]	0	93.204	60	15	218	1	1	322	34.7	8.27	654	607	157.55	187.46	14	14	15	15	metabolic process	mitochondrion	catalytic activity	Pf01571, Pf08669		TRIAE_CS42_2BL_TGACv1_132610_AA0438610			0	1.082	0.11	0.515396	0.957414	18	23.1813	96.1	103.9	18.19	8.71	3	3	76.4	110.4	99.3	107.5	112	94.4
High	Master Protein	W5A1L1	Uncharacterized protein [OS=Triticum aestivum]	0	93.186	53	19	210	1	1	551	61	7.52	498	455	161.1	143.16	18	18	19	19	metabolic process;response to stimulus	mitochondrion	catalytic activity;metal ion binding	Pf00171, Pf03220		TRIAE_CS42_1BL_TGACv1_032456_AA0130110			0	0.808	-0.31	0.61009	0.974121	7.47	20.3471	110.6	89.4	9.12	14.14	3	3	99.3	114.7	118.2	92.7	99.8	75.3
High	Master Protein	A0A1D6ABC9	Uncharacterized protein [OS=Triticum aestivum]	0	93.148	41	18	187	8	1	783	80.8	6.37	501	812	130.02	190.45	16	16	18	18	metabolic process		catalytic activity	Pf00082, Pf02225, Pf05922		TRIAE_CS42_6AL_TGACv1_472954_AA1527470			9	0.995	-0.01	0.931333	0.992737	20.14	26.0062	103.9	96.1	10.56	1.37	3	3	109.2	106.4	89.3	98.4	97	99.7
High	Master Protein	W5AA91	Importin subunit alpha [OS=Triticum aestivum]	0	92.973	49	16	201	14	1	534	58.6	5.25	685	537	157.87	145.94	15	16	16	15	transport	cytoplasm;nucleus	protein binding;transporter activity	Pf00514, Pf01749, Pf02985, Pf13513, Pf13646		TRIAE_CS42_1BS_TGACv1_049533_AA0156060; TRIAE_CS42_1AS_TGACv1_020009_AA0073800			2	0.809	-0.31	0.402739	0.943753	22.63	25.3692	116.4	83.6	19.42	18.85	3	3	112.9	88.6	131.5	77.6	81.1	108.3
High	Master Protein	A0A1D6AV05	Uncharacterized protein [OS=Triticum aestivum]	0	92.972	64	17	240	6	1	383	39.7	7.87	863	877	198.2	189.86	16	16	16	17	metabolic process		catalytic activity;metal ion binding	Pf00107, Pf08240, Pf13602		TRIAE_CS42_6BS_TGACv1_513223_AA1635020			10	1.218	0.28	0.252323	0.8883	25.31	27.6463	92.4	107.6	9.94	3.37	3	3	94.6	96.8	80.2	112.8	110.2	105.5
High	Master Protein	W5FB83	Uncharacterized protein [OS=Triticum aestivum]	0	92.794	68	14	276	1	1	251	26	7.33	976	975	192.13	230.94	13	13	14	14	metabolic process;regulation of biological process	cytoplasm	metal ion binding;nucleotide binding	Pf00166		TRIAE_CS42_5BL_TGACv1_405054_AA1318940			0	0.925	-0.11	0.916295	0.991839	14.2	24.8983	106.2	93.8	18.03	7.76	3	3	115.9	107.8	80.9	93	107.2	95.2
High	Master Protein	D2KZ08	aminotransferase [OS=Triticum aestivum]	0	92.728	55	17	194	4	1	511	55.5	7.4	397	385	156.73	149.83	17	16	16	15	metabolic process		catalytic activity	Pf00155, Pf00202	100682496	TRIAE_CS42_2BL_TGACv1_130280_AA0407970	TaSAG1		14	0.984	-0.02	0.843147	0.986776	20.19	25.0204	100.7	99.3	4.72	13.64	3	3	102.2	95.2	104.2	112.4	100.7	85.3
High	Master Protein	A0A1D5VFQ7	Uncharacterized protein [OS=Triticum aestivum]	0	92.594	48	15	190	12	1	474	52.8	9.17	489	570	150.6	143.1	14	15	13	12	metabolic process		catalytic activity;metal ion binding	Pf03405		TRIAE_CS42_3AL_TGACv1_197997_AA0667810			3	1.088	0.12	0.516967	0.957414	29.27	25.7432	92.8	107.2	11.76	8.2	3	3	89.1	89	108.5	96.8	102.9	113.7
High	Master Protein	A0A1D5RUM5	Uncharacterized protein [OS=Triticum aestivum]	0	92.52	74	16	238	7	1	309	33.9	6.23	490	524	173.02	178.82	16	16	15	15	metabolic process		catalytic activity	Pf00248		TRIAE_CS42_1AL_TGACv1_001352_AA0029180			9	0.85	-0.23	0.460459	0.957414	14.67	27.4075	108	92	4.23	2.7	3	3	108.3	104.5	113.7	92.8	88.3	92.3
High	Master Protein	A0A1D5WNG5	fructose-bisphosphate aldolase [OS=Triticum aestivum]	0	92.492	58	14	228	1	1	347	37.5	7.21	796	659	218.27	174.2	14	14	13	14	metabolic process		catalytic activity	Pf00274		TRIAE_CS42_3DL_TGACv1_252211_AA0888380			0	0.797	-0.33	0.539856	0.960041	20.26	22.3431	111.3	88.7	28.61	8.59	3	3	109.7	77.5	139.8	85.6	87.4	99.9
High	Master Protein	A0A1D6BG44	Uncharacterized protein [OS=Triticum aestivum]	0	92.274	70	14	195	3	1	291	30.4	6.37	666	727	162.72	179.88	10	10	14	13	metabolic process		catalytic activity;nucleotide binding	Pf03435, Pf03446, Pf03807, Pf14833		TRIAE_CS42_6DS_TGACv1_543896_AA1745060			13	0.985	-0.02	0.84888	0.986776	22.64	25.1134	102.3	97.7	3.73	5.99	3	3	101.1	97.6	105.1	94.3	96.5	105.4
High	Master Protein	A0A1D5XHC6	Uncharacterized protein [OS=Triticum aestivum]	0	92.233	55	18	220	1	1	461	50	8.34	961	884	191.47	179.74	18	17	16	16	metabolic process		catalytic activity	Pf00155, Pf04864		TRIAE_CS42_4BL_TGACv1_320575_AA1043580			0	1.451	0.54	0.0496608	0.505303	44.37	20.4807	74.8	125.2	46.66	20.67	3	3	62.6	65.4	134.7	137	90.8	109.4
High	Master Protein	Q6V959	ribosomal protein L3 [OS=Triticum aestivum]	0	92.105	42	18	244	2	1	389	44.6	10.07	608	635	160.99	166.91	17	17	18	18	metabolic process	ribosome	structural molecule activity	Pf00297		TRIAE_CS42_4DS_TGACv1_361995_AA1175430; TRIAE_CS42_4BS_TGACv1_329336_AA1100320			19	0.951	-0.07	0.880526	0.990309	28.38	28.4585	105.4	94.6	5.81	0.77	3	3	96.9	106.7	107.8	97	95.7	95.9
High	Master Protein	A0A1D6RL90	Uncharacterized protein [OS=Triticum aestivum]	0	92.061	29	20	191	11	1	1040	112.2	5.25	479	374	125.63	135.11	20	19	18	18	regulation of biological process	proteasome	enzyme regulator activity	Pf01851, Pf07423, Pf09507, Pf13646		TRIAE_CS42_2BL_TGACv1_130219_AA0406550			9	0.743	-0.43	0.232083	0.884424	24.36	25.2594	120.2	79.8	17.62	10.23	3	3	132.4	93	121.7	78	80.8	94.2
High	Master Protein	A0A1D5WWJ5	Uncharacterized protein [OS=Triticum aestivum]	0	91.985	34	24	203	2	1	842	92.3	5.4	742	725	147.91	156.81	19	19	22	21				Pf01496, Pf01576, Pf02463, Pf04156, Pf05483, Pf05557, Pf05701, Pf06160, Pf07888, Pf09726, Pf09730, Pf09731, Pf10174, Pf12128, Pf13166, Pf13514, Pf15070		TRIAE_CS42_3DS_TGACv1_273604_AA0932460			20	1.136	0.18	0.336514	0.940733	35.97	25.4559	99.3	100.7	24.55	2.82	3	3	101.7	119.4	72	99	103.3	104.6
High	Master Protein	F5A5Q8	Lipoxygenase [OS=Triticum aestivum]	0	91.972	36	20	226	1	1	861	96	6.33	448	465	164.15	172.88	20	20	19	18	metabolic process		catalytic activity;metal ion binding;protein binding	Pf00305, Pf01477					0	0.667	-0.58	0.205756	0.857341	4.42	20.2126	120	80	4.09	10.05	3	3	124.9	115.1	120.4	80.3	71.6	87.6
High	Master Protein	A0A1D6RUJ9	phospholipase D [OS=Triticum aestivum]	0	91.961	43	21	218	1	1	747	84.6	5.66	628	414	162.14	159.34	19	20	20	20	metabolic process	membrane	catalytic activity;metal ion binding	Pf00614, Pf12357, Pf13091		TRIAE_CS42_3DS_TGACv1_273245_AA0929840			0
High	Master Protein	W4ZLJ5	Uncharacterized protein [OS=Triticum aestivum]	0	91.792	44	17	213	2	1	501	56.4	5.31	717	614	159.94	159.51	15	15	17	17	metabolic process		catalytic activity	Pf00398, Pf01209, Pf01739, Pf02353, Pf05175, Pf05891, Pf07021, Pf08241, Pf08242, Pf12847, Pf13489, Pf13649, Pf13659, Pf13847		TRIAE_CS42_1AL_TGACv1_000734_AA0018090			15	0.786	-0.35	0.251412	0.888177	14.86	25.9974	111.2	88.8	8.72	8.42	3	3	108.1	103.2	121.9	86.4	83.1	97.4
High	Master Protein	W5G750	Uncharacterized protein [OS=Triticum aestivum]	0	91.684	53	15	171	2	1	415	45.3	6.57	453	329	132.82	128.09	13	13	15	14	cell communication;metabolic process;response to stimulus	cytoplasm	catalytic activity	Pf01180		TRIAE_CS42_6AL_TGACv1_473388_AA1530780			0	0.97	-0.04	0.75806	0.98358	35.19	22.3276	103	97	12.64	17.99	3	3	94.1	94.7	116.7	86.8	118.5	89.2
High	Master Protein	A0A1D5Y316	Uncharacterized protein [OS=Triticum aestivum]	0	91.624	50	17	176	4	1	552	59.5	8	626	855	130.11	136.41	17	17	17	17	cellular homeostasis;metabolic process;regulation of biological process		antioxidant activity;catalytic activity;nucleotide binding	Pf00070, Pf02852, Pf07992, Pf13434, Pf13738		TRIAE_CS42_4DL_TGACv1_344390_AA1146810			13	1.078	0.11	0.61154	0.975074	26.93	25.9733	92.6	107.4	9.15	11.65	3	3	85.2	102.4	95.3	114.8	110.6	91.7
High	Master Protein	A0A1D6S1E9	Uncharacterized protein [OS=Triticum aestivum]	0	91.451	53	18	168	2	1	525	57.3	6.02	611	367	152.04	120.62	17	17	14	14	metabolic process	cytoplasm	nucleotide binding;protein binding	Pf00118		TRIAE_CS42_5AL_TGACv1_375958_AA1229420			0	0.601	-0.73	0.0937309	0.664889	7.73	20.2208	135.6	64.4	32.31	37.51	3	2	184.1	93.4	162.4		58.8	101.3
High	Master Protein	A0A1D6RQF1	Uncharacterized protein [OS=Triticum aestivum]	0	90.713	33	23	203	2	1	840	92.2	5.55	843	767	151.34	154.69	20	20	20	19				Pf01496, Pf01576, Pf02463, Pf04156, Pf05483, Pf05557, Pf05622, Pf05701, Pf06160, Pf07888, Pf09730, Pf09731, Pf10174, Pf12128, Pf13166, Pf13514, Pf15070		TRIAE_CS42_3AS_TGACv1_210436_AA0672190			1	1.264	0.34	0.106207	0.699149	26.03	21.818	83.1	116.9	2.2	8.12	3	3	87.1	84.2	83.7	118.5	104.4	122
High	Master Protein	A0A1D5XNE2	Uncharacterized protein [OS=Triticum aestivum]	0	90.68	53	18	164	1	1	525	57.2	6.14	558	299	149.53	113.12	16	16	14	13	metabolic process	cytoplasm	nucleotide binding;protein binding	Pf00118		TRIAE_CS42_4BL_TGACv1_322527_AA1071800			0	0.855	-0.23	0.828438	0.986038	21.59	19.2308	107.8	92.2	13.44	29.4	3	3	96.2	96.8	120.8	75.9	82.8	127.5
High	Master Protein	W5HT52	Uncharacterized protein [OS=Triticum aestivum]	0	90.642	45	17	181	1	1	545	59.3	6.06	587	523	130.08	145.94	15	16	13	14	metabolic process	cytoplasm;cytosol	nucleotide binding;protein binding	Pf00118		TRIAE_CS42_7BS_TGACv1_593884_AA1954980			0	0.946	-0.08	0.912401	0.991839	14.33	19.8038	102.8	97.2	8.54	13.28	3	3	97.7	99.8	114	84.3	94.5	109.6
High	Master Protein	A0A1D5UQW5	Uncharacterized protein [OS=Triticum aestivum]	0	90.547	44	13	160	4	1	423	45.4	5.5	779	674	140.29	107.92	12	13	10	11						TRIAE_CS42_2DL_TGACv1_160210_AA0548190			0	1.162	0.22	0.342122	0.942528	39.61	23.2229	96.6	103.4	15.33	14.77	3	3	96	108	79.2	91.5	122.4	102.9
High	Master Protein	A0A1D5YPC2	Uncharacterized protein [OS=Triticum aestivum]	0	90.179	40	16	196	2	1	624	67.3	7.49	651	706	147.31	163.92	14	15	15	15	metabolic process		catalytic activity	Pf00933, Pf01915		TRIAE_CS42_5AL_TGACv1_377241_AA1245300			0	1.227	0.3	0.149787	0.787215	37.4	21.9397	86.3	113.7	11.82	17.8	3	3	95.3	75.1	87.2	134.1	93.4	114.9
High	Master Protein	A0A1D5YH13	Uncharacterized protein [OS=Triticum aestivum]	0	89.805	46	11	212	11	1	374	40.4	7.15	708	950	156.1	196.87	11	11	11	11	metabolic process	cytoplasm	catalytic activity;nucleotide binding;protein binding	Pf01118, Pf02774		TRIAE_CS42_5AL_TGACv1_375002_AA1213730			0	0.898	-0.16	0.651568	0.983028	18.97	25.9529	103.4	96.6	5.24	4.13	3	3	108.2	103.4	97.4	96.7	101.1	93.1
High	Master Protein	A0A1D5WYN7	Uncharacterized protein [OS=Triticum aestivum]	0	89.791	52	19	179	4	1	540	57.9	5.48	392	470	104.62	134.37	15	17	15	15	metabolic process	cytoplasm	nucleotide binding;protein binding	Pf00118		TRIAE_CS42_4AL_TGACv1_288337_AA0945320			15	0.826	-0.28	0.384168	0.943753	19.73	25.7813	113.3	86.7	8.89	11.18	3	3	116.6	98	112.2	84.6	85.9	102.8
High	Master Protein	A0A1D5S8V6	Uncharacterized protein [OS=Triticum aestivum]	0	89.785	74	15	218	3	1	309	33.9	6.54	509	657	148.26	178.5	15	15	13	13	metabolic process		catalytic activity	Pf00248		TRIAE_CS42_1BL_TGACv1_030775_AA0100490			0	0.866	-0.21	0.774547	0.98358	24.69	23.0945	104.4	95.6	12.36	16.33	3	3	124.3	100	102.1	104.8	75.3	93.5
High	Master Protein	A1YE34	ribosomal protein L3-B2 [OS=Triticum aestivum]	0	89.677	40	17	238	1	1	389	44.6	10.07	591	633	158.54	161.53	16	16	17	17	metabolic process	ribosome	structural molecule activity	Pf00297		TRIAE_CS42_4AL_TGACv1_290631_AA0987660			0	0.804	-0.31	0.614718	0.976279	2.22	22.1565	110.8	89.2	2.9	1.5	3	3	114.9	109.2	109.5	88.2	87.8	90.3
High	Master Protein	A0A1D5RXD0	Uncharacterized protein [OS=Triticum aestivum]	0	89.604	49	13	182	5	1	447	47.6	5.62	507	532	139.38	143.86	12	13	12	13			catalytic activity	Pf02458		TRIAE_CS42_1AL_TGACv1_002304_AA0040720			9	0.78	-0.36	0.233501	0.884424	15.53	26.4628	110.3	89.7	8.57	14.67	3	3	101.7	109	120.5	76.9	88.6	103.2
High	Master Protein	A0A1D5XUM6	Uncharacterized protein [OS=Triticum aestivum]	0	89.487	41	17	201	14	1	659	72.3	5.5	541	582	159.24	150.25	17	17	15	15	metabolic process		catalytic activity	Pf06964		TRIAE_CS42_4BS_TGACv1_329981_AA1105270			4	0.95	-0.07	0.980759	0.99817	29.96	25.574	102.4	97.6	7.78	12.26	3	3	104.5	95.1	111.1	106.4	99.6	83.4
High	Master Protein	W4ZPK7	Uncharacterized protein [OS=Triticum aestivum]	0	89.45	54	19	202	2	1	551	61.1	7.14	492	446	161.35	135.63	18	18	19	19	metabolic process;response to stimulus	mitochondrion	catalytic activity;metal ion binding	Pf00171, Pf03220		TRIAE_CS42_1AL_TGACv1_000567_AA0014810			0	1.015	0.02	0.544365	0.960298	20.97	21.4519	100.8	99.2	12.14	13.74	3	3	86.6	104.6	109.7	111.6	102.9	84.7
High	Master Protein	A0A1D5SLI4	40S ribosomal protein S4 [OS=Triticum aestivum]	0	89.154	52	15	176	15	1	265	29.9	10.15	536	577	125.07	127.44	12	12	15	15	metabolic process	ribosome	RNA binding;structural molecule activity	Pf00900, Pf01479, Pf08071		TRIAE_CS42_1BS_TGACv1_050070_AA0166960; TRIAE_CS42_1AS_TGACv1_020275_AA0076210; TRIAE_CS42_1DS_TGACv1_081257_AA0259300			0	1.012	0.02	0.86233	0.986776	35.54	27.8463	103.5	96.5	12.94	16.69	3	3	98.7	102.3	124.7	74.6	95.4	104.3
High	Master Protein	W5AMI8	Uncharacterized protein [OS=Triticum aestivum]	0	89.023	53	14	212	4	1	347	37.5	9	690	397	194.7	118.84	14	14	12	12	metabolic process		catalytic activity	Pf00106, Pf08659, Pf13561		TRIAE_CS42_1DS_TGACv1_080735_AA0252940			0	0.637	-0.65	0.0568202	0.516953	16.97	24.4709	122.4	77.6	18.18	16.6	3	3	110.6	112.5	150.7	89.5	71.3	65.4
High	Master Protein	P58386	Photosystem I P700 chlorophyll a apoprotein A2 [OS=Triticum aestivum]	0	88.942	36	16	194	16	1	734	82.5	7.15	502	429	146.21	159.28	15	16	15	15	metabolic process;transport	membrane	catalytic activity;metal ion binding	Pf00223	803182		psaB		0	1.014	0.02	0.851115	0.986776	45.44	26.3261	98.5	101.5	27.19	21.12	3	3	89.3	80.9	132	83	91.9	122.9
High	Master Protein	W5ARE8	Uncharacterized protein [OS=Triticum aestivum]	0	88.772	44	20	206	3	1	776	82.1	5.92	488	703	158.62	171.56	18	20	17	17	metabolic process		catalytic activity	Pf00933, Pf01915, Pf14310		TRIAE_CS42_2AL_TGACv1_093323_AA0277530			0	1.006	0.01	0.65497	0.983028	17.3	22.3557	96	104	4.1	14.96	3	3	100.5	94.1	101.6	108.8	83.8	111.2
High	Master Protein	A0A1D5VCR6	Uncharacterized protein [OS=Triticum aestivum]	0	88.547	54	16	199	16	1	344	37.3	5.72	460	597	127.8	142.89	15	15	15	15	metabolic process		catalytic activity	Pf00316		TRIAE_CS42_3DL_TGACv1_250627_AA0871280; TRIAE_CS42_3AL_TGACv1_195795_AA0654050			0	1.456	0.54	0.0372226	0.427395	31.7	27.2715	81.6	118.4	7.14	9.55	3	3	82.1	88.2	76.4	128.3	119.1	105.9
High	Master Protein	A0A1D6AVN7	Uncharacterized protein [OS=Triticum aestivum]	0	88.444	70	13	179	2	1	291	30.3	6.37	658	689	149.36	159.57	9	9	13	13	metabolic process		catalytic activity;nucleotide binding	Pf03435, Pf03446, Pf03807, Pf14833		TRIAE_CS42_6BS_TGACv1_513328_AA1638340			0	1.28	0.36	0.145719	0.779343	27.41	23.0033	93.1	106.9	26.86	30.74	3	3	112	93.4	64.1	107.2	145.4	77.9
High	Master Protein	A0A1D6BE04	Uncharacterized protein [OS=Triticum aestivum]	0	88.43	50	17	195	1	1	443	48.3	8.37	899	792	144.21	144.92	15	14	16	15	metabolic process		catalytic activity;nucleotide binding	Pf00389, Pf02826		TRIAE_CS42_6DS_TGACv1_543041_AA1734480			17	1.222	0.29	0.244987	0.886441	26.15	26.9326	91	109	15.56	10.67	3	3	87.1	83.2	110.1	104.4	96.3	118.8
High	Master Protein	A0A1D6CXJ6	Uncharacterized protein [OS=Triticum aestivum]	0	88.189	34	20	195	2	1	742	82	7.12	548	425	148.89	131.63	18	18	17	16	metabolic process	cytoplasm	catalytic activity;nucleotide binding	Pf00458, Pf00587, Pf03129		TRIAE_CS42_7DS_TGACv1_621673_AA2022850			19	0.857	-0.22	0.594446	0.970428	21.93	25.3807	112.7	87.3	15.17	13.54	3	3	112.8	90.6	122.9	87.4	81.2	105
High	Master Protein	W5GBX1	Uncharacterized protein [OS=Triticum aestivum]	0	88.094	57	15	231	4	1	383	39.9	7.87	856	910	191.72	190.63	15	14	15	15	metabolic process		catalytic activity;metal ion binding	Pf00107, Pf08240, Pf13602		TRIAE_CS42_6AS_TGACv1_485775_AA1551840			0	1.267	0.34	0.11708	0.719093	20.74	24.4009	86.6	113.4	7.91	9.17	3	3	82	88.8	96.1	117.4	116.4	99.3
High	Master Protein	A0A1D5S3L0	Uncharacterized protein [OS=Triticum aestivum]	0	87.94	52	13	215	5	1	299	31.7	8.82	589	649	158.93	186.52	13	13	13	13				Pf05368, Pf13460		TRIAE_CS42_1AS_TGACv1_019933_AA0073040			9	1.141	0.19	0.420712	0.943753	31.31	26.9844	95.5	104.5	2.71	6.4	3	3	93.3	94.6	98.2	111.9	103.5	98.6
High	Master Protein	A0A1D6CGC2	Uncharacterized protein [OS=Triticum aestivum]	0	87.938	36	20	201	2	1	691	76.6	6.3	512	434	151.73	132.72	18	18	18	17	metabolic process	cytoplasm	catalytic activity;nucleotide binding	Pf00458, Pf00587, Pf03129		TRIAE_CS42_7BS_TGACv1_592423_AA1937860			0	0.971	-0.04	0.766412	0.98358	19.84	22.5496	103.3	96.7	23.41	3.7	3	3	98.3	90	137.6	92	87.7	94.4
High	Master Protein	W5BDJ1	Uncharacterized protein [OS=Triticum aestivum]	0	87.896	52	14	155	5	1	425	45.7	5.5	715	676	129.93	116.21	13	13	11	12						TRIAE_CS42_2BL_TGACv1_131639_AA0430110			13	1.103	0.14	0.530318	0.959675	26.75	25.8857	96.8	103.2	11.69	11.79	3	3	103.3	99.3	82.4	92.3	117	105.7
High	Master Protein	A0A1D6S8D1	Uncharacterized protein [OS=Triticum aestivum]	0	87.806	58	17	195	1	1	386	42	7.83	899	784	144.21	145.06	15	14	16	15	metabolic process		catalytic activity;nucleotide binding	Pf00389, Pf02826		TRIAE_CS42_6AS_TGACv1_486107_AA1556800			0	0.628	-0.67	0.330852	0.940733	2.78	18.5694	122.8	77.2	6.71		2	1	239.2	217.5			143.3
High	Master Protein	A0A1D5U0Y2	Uncharacterized protein [OS=Triticum aestivum]	0	87.717	46	15	198	3	1	534	57.1	6.1	563	716	150.94	173.93	14	14	15	15	metabolic process		catalytic activity	Pf00171		TRIAE_CS42_2BL_TGACv1_130731_AA0416980			12	0.95	-0.07	0.875781	0.989699	21.69	26.6149	101.3	98.7	7.95	6.28	3	3	113.9	100.3	98.9	100.3	97.7	88.8
High	Master Protein	W5G882	Uncharacterized protein [OS=Triticum aestivum]	0	87.515	48	14	193	3	1	431	46.8	6.83	476	577	136.89	152.11	13	13	14	14	metabolic process;response to stimulus	membrane	antioxidant activity;catalytic activity	Pf00141		TRIAE_CS42_6AL_TGACv1_470886_AA1497540			2	1.324	0.4	0.078225	0.603548	19.42	23.8193	90	110	10.83	3.28	3	3	95.2	90.7	77	116.5	109.7	110.8
High	Master Protein	A0A1D5SW54	ATP-dependent Clp protease proteolytic subunit [OS=Triticum aestivum]	0	87.232	59	8	147	1	1	296	31.8	5.4	629	636	138.16	123.64	8	8	7	7	metabolic process		catalytic activity	Pf00574		TRIAE_CS42_1DL_TGACv1_062491_AA0215250			0	0.874	-0.19	0.946554	0.994448	65.26	19.0257	104.6	95.4	65.59	62.98	3	3	107.8	176.9	36.5	98.4	31.9	148.5
High	Master Protein	W5FM07	Uncharacterized protein [OS=Triticum aestivum]	0	87.224	74	13	210	1	1	257	26.9	6.73	927	950	162.49	171.81	13	13	13	13		membrane		Pf00314		TRIAE_CS42_U_TGACv1_643161_AA2128250			13	0.83	-0.27	0.389305	0.943753	28.08	28.7122	110	90	29.91	10.91	3	3	145.5	108	79.3	88.4	99.1	79.7
High	Master Protein	A0A1D5T764	Uncharacterized protein [OS=Triticum aestivum]	0	87.202	44	18	187	10	1	576	63.7	4.91	335	310	135.84	128.27	16	15	16	14	cellular homeostasis;regulation of biological process			Pf00085, Pf00578, Pf03107, Pf07649, Pf08534, Pf13098, Pf13899, Pf13905		TRIAE_CS42_2AL_TGACv1_093267_AA0276130			6	0.727	-0.46	0.119332	0.721893	14.6	26.2564	115.7	84.3	6.88	4.16	3	3	123.2	107.4	115.7	88.2	81.2	84.3
High	Master Protein	A0A1D5XM57	Uncharacterized protein [OS=Triticum aestivum]	0	87.186	50	17	169	4	1	550	59.5	7.81	396	620	105.12	137.37	17	17	17	17	cellular homeostasis;metabolic process;regulation of biological process		antioxidant activity;catalytic activity;nucleotide binding	Pf00070, Pf02852, Pf07992, Pf13434, Pf13738		TRIAE_CS42_4BL_TGACv1_321849_AA1066190			0	1.114	0.16	0.399193	0.943753	21.56	23.5079	91.7	108.3	10.15	13.68	3	3	88.5	103	85.4	123.7	104.5	94.8
High	Master Protein	A0A1D5SD92	Uncharacterized protein [OS=Triticum aestivum]	0	87.148	70	14	336	1	1	335	36.3	6.52	631	546	283.42	233.83	14	14	14	14			protein binding	Pf00400		TRIAE_CS42_1BL_TGACv1_031898_AA0122320			0	0.877	-0.19	0.8706	0.989186	9.34	21.7799	110.8	89.2	7.36	10.2	3	3	110.2	113.1	98.2	86.1	88.7	103.6
High	Master Protein	W5I4I8	Uncharacterized protein [OS=Triticum aestivum]	0	87.143	54	14	199	5	1	447	47.3	7.85	682	424	176.18	153.12	14	13	13	12		membrane	catalytic activity	Pf00657		TRIAE_CS42_7DL_TGACv1_604239_AA1995620			11	0.601	-0.74	0.0105525	0.18607	11.67	26.0266	127.2	72.8	13.77	16.22	3	3	144.7	125	109.9	62.6	86.2	71.6
High	Master Protein	Q5XUU8	14-3-3 protein [OS=Triticum aestivum]	0	86.978	49	14	280	1	1	263	29.9	4.68	956	912	179.62	200.3	14	14	14	14			protein binding	Pf00244	543463		LOC543463		0	1.093	0.13	0.45809	0.957414	3.94	19.1107	95.5	104.5	3.76		2	1		188.8	199.1	212
High	Master Protein	A0A1D6D8Y8	Uncharacterized protein [OS=Triticum aestivum]	0	86.972	37	21	135	4	1	774	82.4	6.67	754	545	126.41	83.52	20	19	14	15	metabolic process		catalytic activity	Pf00082, Pf03131, Pf07362, Pf14265		TRIAE_CS42_U_TGACv1_641028_AA2082680			0	0.928	-0.11	0.886993	0.990309	31.15	21.8556	109.4	90.6	16.52	3.78	3	3	120.2	112.1	86.5	90.8	97.7	92.8
High	Master Protein	A0A1D5STK8	glycosyltransferase [OS=Triticum aestivum]	0	86.943	41	15	200	5	1	475	50.6	5.35	703	431	175.53	143.16	15	15	13	14	metabolic process		catalytic activity	Pf00201		TRIAE_CS42_1DL_TGACv1_061796_AA0203530			10	0.87	-0.2	0.538041	0.960041	26.66	26.0287	106	94	9.37	12.21	3	3	108.7	94.6	113.6	96.3	82	104.8
High	Master Protein	A9LIN4	malic enzyme [OS=Triticum aestivum]	0	86.817	61	19	159	16	1	570	63	5.82	366	300	136.93	115.85	18	19	12	12	metabolic process		catalytic activity;metal ion binding;nucleotide binding	Pf00390, Pf03949	100137005	TRIAE_CS42_1DS_TGACv1_080216_AA0243400	LOC100137005		3	0.723	-0.47	0.159339	0.792321	18.73	25.3576	119	81	23.16	8.71	3	3	143.3	89.3	117.3	91.8	79.8	78.7
High	Master Protein	A0A158N6J5	ATP-dependent Clp protease proteolytic subunit [OS=Triticum aestivum]	0	86.576	59	8	148	1	1	296	31.7	5.3	624	627	137.7	126.64	8	8	7	7	metabolic process		catalytic activity	Pf00574					12	1.078	0.11	0.499459	0.957414	26.04	24.824	97	103	8.07	7.18	3	3	91.1	106.7	96.3	94.5	109.1	102.3
High	Master Protein	A0A1D6RH21	Uncharacterized protein [OS=Triticum aestivum]	0	86.546	55	14	249	2	1	312	33.7	9.03	811	780	191.16	192.24	14	14	13	13		membrane	protein binding	Pf02798, Pf13409, Pf13410, Pf13417		TRIAE_CS42_1DS_TGACv1_080640_AA0251420			11	0.856	-0.22	0.481986	0.957414	12.75	29.3856	107.9	92.1	5.23	0.32	3	3	108.2	101.7	113	92.3	92.7	92.1
High	Master Protein	W5BMD1	Ribulose bisphosphate carboxylase small chain [OS=Triticum aestivum]	0	86.532	55	12	300	2	1	193	21.2	9.11	617	822	181.48	228.93	12	12	11	11	metabolic process		catalytic activity	Pf00101, Pf12338		TRIAE_CS42_2BS_TGACv1_145925_AA0449650			5	1.523	0.61	0.020516	0.296767	38.75	30.5293	84.2	115.8	30.24	6.6	3	3	63.4	84.1	116.1	115.8	103.6	116.9
High	Master Protein	A0A1D5UMY9	Uncharacterized protein [OS=Triticum aestivum]	0	86.35	43	20	200	3	1	776	82.2	6.3	451	640	147.63	162.33	18	20	17	17	metabolic process		catalytic activity	Pf00933, Pf01915, Pf14310		TRIAE_CS42_2DL_TGACv1_159251_AA0535430			16	1.057	0.08	0.685121	0.983028	30.58	26.4142	96.2	103.8	20.28	14.62	3	3	81	95.4	120.6	103	85.3	114.7
High	Master Protein	D7PGW0	cinnamyl alcohol dehydrogenase [OS=Triticum aestivum]	0	86.345	52	13	208	1	1	360	38.6	6.14	413	548	157.96	163.5	13	13	13	13	metabolic process		catalytic activity;metal ion binding	Pf00107, Pf08240	100682433	TRIAE_CS42_6DS_TGACv1_542539_AA1723880	CAD		0	0.958	-0.06	0.72942	0.983028	6.84	21.016	102.1	97.9	5.33		3	1	143.9	160.1	151.2	144.9
High	Master Protein	A0A1D6RXF7	40S ribosomal protein S3a [OS=Triticum aestivum]	0	85.874	59	14	212	1	1	263	30	9.79	592	585	168.81	146.99	14	14	14	14	metabolic process	cytoplasm;ribosome	structural molecule activity	Pf01015		TRIAE_CS42_4BL_TGACv1_320880_AA1050780			0	0.998	0	0.762904	0.98358	12.87	24.6093	100.1	99.9	11.94	6.27	3	3	102	87.9	111.8	92.4	104.2	101.8
High	Master Protein	W5DP16	UDP-glucose 6-dehydrogenase [OS=Triticum aestivum]	0	85.814	58	17	173	11	1	480	52.9	6	646	438	138.55	134.9	16	15	16	16	metabolic process		catalytic activity;nucleotide binding	Pf00984, Pf03720, Pf03721		TRIAE_CS42_4AL_TGACv1_288304_AA0944130			0	0.776	-0.37	0.303105	0.923116	18.14	25.0322	109.4	90.6	10.54	10.73	3	3	110.4	102.1	125.5	76.6	91.4	94
High	Master Protein	A0A1D6SBV0	T-complex protein 1 subunit gamma [OS=Triticum aestivum]	0	85.753	43	19	208	19	1	558	60.9	6.33	506	455	164.82	137.14	19	19	16	18	metabolic process	cytoplasm	nucleotide binding;protein binding	Pf00118		TRIAE_CS42_7AL_TGACv1_556580_AA1766260			0	0.8	-0.32	0.393375	0.943753	24	25.2437	121.7	78.3	16.12	17.4	3	3	124.7	91.9	122	78.3	78.5	104.6
High	Master Protein	A0A1D6RFA9	Uncharacterized protein [OS=Triticum aestivum]	0	85.742	69	15	205	3	1	309	33.9	6.23	495	532	148.51	157.2	15	15	13	13	metabolic process		catalytic activity	Pf00248		TRIAE_CS42_1DL_TGACv1_061382_AA0193780			4	0.854	-0.23	0.586255	0.970069	16.71	25.3603	103.8	96.2	16.32	9.49	3	3	98.4	92.1	124.4	105.4	91.2	88.6
High	Master Protein	A0A1D6RVF1	40S ribosomal protein S3a [OS=Triticum aestivum]	0	85.673	59	14	210	1	1	263	29.9	9.79	583	569	171.68	146.16	14	14	14	14	metabolic process	cytoplasm;ribosome	structural molecule activity	Pf01015		TRIAE_CS42_4AS_TGACv1_306355_AA1006890			18	0.892	-0.16	0.627836	0.980056	29.61	27.3562	97.2	102.8	19.58	12.72	3	3	94	87.4	124.8	84.8	99.4	109.6
High	Master Protein	A0A1D5UMA6	Glutamyl-tRNA(Gln) amidotransferase subunit A, chloroplastic/mitochondrial [OS=Triticum aestivum]	0	85.45	51	17	184	1	1	541	57	6.06	629	878	142	162.72	16	15	16	16	cell organization and biogenesis;metabolic process	mitochondrion	catalytic activity;nucleotide binding	Pf01425		TRIAE_CS42_2DL_TGACv1_159111_AA0532640			1	0.942	-0.09	0.888484	0.990309	21.81	20.3986	97.5	102.5	24.11	2.17	3	3	86.5	132.5	92.4	97.6	93.8	97.1
High	Master Protein	A0A1D6AEZ9	Uncharacterized protein [OS=Triticum aestivum]	0	85.298	42	14	158	2	1	421	47	8.98	732	430	170.48	109.3	14	14	11	11	metabolic process	cytoplasm	catalytic activity;nucleotide binding	Pf00004, Pf00910, Pf01057, Pf01078, Pf05496, Pf06068, Pf06414, Pf07724, Pf07726, Pf07728, Pf13191, Pf13207, Pf13401		TRIAE_CS42_6AS_TGACv1_485576_AA1547910			15	0.702	-0.51	0.119557	0.72194	17.93	25.358	122.5	77.5	20.21	11.27	3	3	133.1	89.8	127.9	75	80.9	93.3
High	Master Protein	A0A1D6AIF0	citrate synthase [OS=Triticum aestivum]	0	85.216	53	16	206	2	1	472	52.5	7.34	599	641	160.4	167.87	15	13	13	13	metabolic process		catalytic activity	Pf00285		TRIAE_CS42_6AS_TGACv1_487101_AA1568080			19	0.834	-0.26	0.429499	0.945676	17.89	25.734	110.6	89.4	1.89	2.74	3	3	110.5	111	107.2	93.2	88.6	89.4
High	Master Protein	A0A1D6AHU2	Uncharacterized protein [OS=Triticum aestivum]	0	85.195	37	17	215	1	1	679	76.6	5.86	351	402	144.55	135.45	17	17	15	15	metabolic process		catalytic activity	Pf00311		TRIAE_CS42_6AS_TGACv1_486733_AA1564550			0
High	Master Protein	A0A1D6BGF2	Uncharacterized protein [OS=Triticum aestivum]	0	85.159	36	17	179	17	1	777	86.7	6.3	431	492	124.87	148.11	15	16	16	16	metabolic process		catalytic activity	Pf00326, Pf02897		TRIAE_CS42_6DS_TGACv1_544122_AA1746590			0	0.948	-0.08	0.99865	0.999585	29.81	25.0902	102.2	97.8	4.4	0.74	3	3	100.2	108.5	101.3	97.2	95.9	97
High	Master Protein	A0A1D5SYB6	Uncharacterized protein [OS=Triticum aestivum]	0	85.132	42	16	197	1	1	501	56.4	5.31	632	588	147.52	154.64	14	14	16	16	metabolic process		catalytic activity	Pf00398, Pf01209, Pf01728, Pf01739, Pf02353, Pf05175, Pf05891, Pf07021, Pf08241, Pf08242, Pf12847, Pf13489, Pf13649, Pf13659, Pf13847		TRIAE_CS42_1DL_TGACv1_063094_AA0223830			0	0.821	-0.28	0.643284	0.981541	7.17	21.3709	108.3	91.7	12.94	13.98	3	3	103.5	126.2	100.1	78.9	87.6	103.7
High	Master Protein	A0A1D5UC06	Uncharacterized protein [OS=Triticum aestivum]	0	84.933	25	17	178	1	1	1034	112.6	5.3	684	502	152.3	129.85	17	17	14	13			protein binding	Pf00400, Pf03154, Pf03326, Pf04652, Pf08801, Pf09770, Pf12931		TRIAE_CS42_2BS_TGACv1_147032_AA0476820			0	0.948	-0.08	0.845635	0.986776	41.63	18.6858	109.4	90.6	50.48	26.27	3	2	160.8	144.9	50.1		144.7	99.4
High	Master Protein	W5EIA3	Uncharacterized protein [OS=Triticum aestivum]	0	84.929	53	16	196	2	1	479	51.7	7.93	422	445	152.51	133.61	16	16	14	14	metabolic process;response to stimulus	membrane;mitochondrion	catalytic activity;metal ion binding	Pf00155, Pf00202		TRIAE_CS42_4DL_TGACv1_347334_AA1156410			13	1.053	0.07	0.587985	0.970428	23.15	25.4915	96.7	103.3	9.15	5.23	3	3	88	97.9	105.7	107.1	104.6	96.8
High	Master Protein	A0A1D6B042	Uncharacterized protein [OS=Triticum aestivum]	0	84.897	59	11	316	1	1	226	23.2	7.94	981	1162	233.09	289.47	8	8	11	11	cellular homeostasis;metabolic process;regulation of biological process		catalytic activity	Pf00578, Pf08534		TRIAE_CS42_6BS_TGACv1_514761_AA1664110			11	1.117	0.16	0.4878	0.957414	33.41	28.1447	102.6	97.4	18.19	4.8	3	3	109	110.1	78.3	103.9	103.4	95.3
High	Master Protein	W4ZXK1	Uncharacterized protein [OS=Triticum aestivum]	0	84.873	55	14	234	2	1	311	33.7	8.76	768	620	183.83	164.55	14	14	12	12			protein binding	Pf02798, Pf13409, Pf13410, Pf13417		TRIAE_CS42_1AS_TGACv1_019083_AA0060250			0	0.786	-0.35	0.426963	0.945676	3.72	23.4728	112	88	7.07	2.65	3	3	118.2	102.8	113.7	85.8	89.4	90.1
High	Master Protein	A0A1D5YG51	Uncharacterized protein [OS=Triticum aestivum]	0	84.844	68	10	151	3	1	222	23.6	4.37	966	886	130.66	139.29	8	9	6	8				Pf01849		TRIAE_CS42_5AL_TGACv1_374828_AA1209720			0	0.875	-0.19	0.733888	0.983028	20.3	24.2606	108.1	91.9	17.36	11.11	3	3	120.1	113.4	85.3	82.2	96.4	102.6
High	Master Protein	A0A1D6AM29	Uncharacterized protein [OS=Triticum aestivum]	0	84.767	44	14	203	4	1	469	50.9	8.4	495	606	141.47	154.81	13	14	13	13	metabolic process;response to stimulus	membrane	antioxidant activity;catalytic activity	Pf00141		TRIAE_CS42_6BL_TGACv1_499717_AA1589930			11	1.293	0.37	0.143764	0.772892	23.11	26.295	89.5	110.5	8.15	7.98	3	3	91.3	92.4	79.5	120.9	112.8	103
High	Master Protein	A0A1D6RPG3	Uncharacterized protein [OS=Triticum aestivum]	0	84.486	55	14	194	3	1	388	41.2	9.38	602	521	146.35	123.9	14	14	11	12	metabolic process		catalytic activity	Pf00106		TRIAE_CS42_2DL_TGACv1_160970_AA0555660			10	0.756	-0.4	0.176381	0.809827	29.36	25.8638	123.6	76.4	29.66	15.49	3	3	144.4	131.9	78.4	94.6	81.5	69.3
High	Master Protein	U3LW54	Senescence-associated subtilisin protease [OS=Triticum aestivum]	0	84.481	36	14	175	4	1	786	81.5	6.65	528	660	149.02	174.39	14	14	13	13	metabolic process		catalytic activity	Pf00082, Pf02225, Pf05922					0	1.044	0.06	0.555436	0.960901	12.82	23.831	100.8	99.2	4.85	6.33	3	3	104	100.5	94.4	94.8	107.3	99
High	Master Protein	A0A1D5UGQ6	Uncharacterized protein [OS=Triticum aestivum]	0	84.328	40	19	159	12	1	767	86.6	7.62	337	322	115.11	104.04	17	17	15	14	metabolic process		catalytic activity	Pf00676, Pf02779		TRIAE_CS42_2DL_TGACv1_157997_AA0505380			6	0.853	-0.23	0.606794	0.973146	23.42	24.9663	108.9	91.1	11.91	7.28	3	3	107.2	96.7	122.4	98.6	85.6	89.6
High	Master Protein	A0A1D5VAK1	Uncharacterized protein [OS=Triticum aestivum]	0	84.292	51	11	167	1	1	356	38.5	6.19	481	514	116.59	130.58	11	11	10	10	metabolic process		catalytic activity;protein binding	Pf00891, Pf08100		TRIAE_CS42_3AL_TGACv1_195106_AA0644850			0	0.843	-0.25	0.816341	0.985276	30.05	19.2008	115.7	84.3	44.36	42.39	3	2	71.2	135	187.3	72.3		134.2
High	Master Protein	A0A1D5ST23	ribosomal protein [OS=Triticum aestivum]	0	84.049	45	17	211	17	1	348	37.5	8.16	413	526	141.6	156.55	15	15	17	17	metabolic process	ribosome	RNA binding;structural molecule activity	Pf00687		TRIAE_CS42_1DL_TGACv1_061650_AA0201010			0	1.179	0.24	0.329717	0.940733	28.13	27.9382	97.5	102.5	11.58	4.61	3	3	95.3	109.4	87.1	99.8	108.2	100.2
High	Master Protein	A0A1D6BYA9	Uncharacterized protein [OS=Triticum aestivum]	0	84.017	31	19	182	2	1	741	82	7.12	539	398	141.34	123.41	16	16	16	16	metabolic process	cytoplasm	catalytic activity;nucleotide binding	Pf00458, Pf00587, Pf03129		TRIAE_CS42_7AS_TGACv1_570523_AA1837030			0	0.75	-0.42	0.412273	0.943753	9.99	22.0934	112.9	87.1	11.33	7.85	3	3	128.6	106.8	105.8	82.4	82.3	94.1
High	Master Protein	A0A096UKR2	Uncharacterized protein [OS=Triticum aestivum]	0	84.011	51	12	217	3	1	300	31.8	9.03	518	646	164.16	179.19	12	12	12	12	defense response;response to stimulus	extracellular	metal ion binding	Pf05368, Pf13460		TRIAE_CS42_1BS_TGACv1_049609_AA0157780			0	1.256	0.33	0.138187	0.766338	20.47	23.8439	88.3	111.7	18.12	4.16	3	3	77	87	109.2	110.1	104	112.8
High	Master Protein	A0A077RVB3	Uncharacterized protein [OS=Triticum aestivum]	0	83.896	59	14	191	9	1	356	40.5	6.43	493	413	137.38	139.59	12	13	13	14	metabolic process		catalytic activity	Pf03214					0	0.772	-0.37	0.340877	0.942528	14.22	24.3587	111.6	88.4	10.76	6.43	3	3	113.9	97.6	120.8	83	94.4	90.2
High	Master Protein	A0A1D5RTT2	Uncharacterized protein [OS=Triticum aestivum]	0	83.846	70	14	326	1	1	335	36.3	6.52	630	556	274.36	224.9	14	14	14	14			protein binding	Pf00400		TRIAE_CS42_1AL_TGACv1_001103_AA0025100			10	0.979	-0.03	0.996751	0.99955	25.68	26.4492	102.1	97.9	9.95	9.44	3	3	100.6	91.8	111.9	90.5	96.4	108.7
High	Master Protein	A0A1D5U015	Glutamyl-tRNA(Gln) amidotransferase subunit A, chloroplastic/mitochondrial [OS=Triticum aestivum]	0	83.644	49	17	178	1	1	541	56.8	6.06	628	870	131.23	157.68	15	16	16	16	cell organization and biogenesis;metabolic process	mitochondrion	catalytic activity;nucleotide binding	Pf01425		TRIAE_CS42_2BL_TGACv1_130514_AA0412680			17	1.137	0.18	0.416867	0.943753	21.53	25.8177	94.2	105.8	1.62	3.73	3	3	92.9	96	94.6	109	106.2	101.3
High	Master Protein	A0A077RX76	Uncharacterized protein [OS=Triticum aestivum]	0	83.536	55	15	186	1	1	419	46.4	6.05	338	399	128.55	119.66	14	13	15	13			catalytic activity	Pf02458		TRIAE_CS42_3B_TGACv1_225596_AA0810200			2	0.838	-0.26	0.73323	0.983028	15.57	22.5955	110.7	89.3	21.26	12.36	3	3	90.6	105.7	136.9	85.3	80.2	101.2
High	Master Protein	D5MTE2	glycosyltransferase [OS=Triticum aestivum]	0	83.488	43	16	196	1	1	456	49.7	5.8	704	618	131.56	128.39	15	14	15	15	metabolic process		catalytic activity	Pf00201		TRIAE_CS42_7DS_TGACv1_623203_AA2050640			0	0.48	-1.06	0.00909322	0.166289	7.07	20.0479	135.1	64.9	5.27	22.3	3	3	144	129.9	134.3	49.4	64.4	77.9
High	Master Protein	A0A1D5RVH9	6-phosphogluconate dehydrogenase, decarboxylating [OS=Triticum aestivum]	0	83.447	57	14	183	1	1	433	45.6	5.24	844	712	179.24	164.57	13	13	14	14	metabolic process		catalytic activity	Pf00393, Pf03446		TRIAE_CS42_1AL_TGACv1_001598_AA0032730			0	0.969	-0.05	0.77381	0.98358	20.05	19.134	104.3	95.7	21.27	10.91	2	3		142.8	105.5	107.3	112.7	131.7
High	Master Protein	A0A1D6BD14	glyceraldehyde-3-phosphate dehydrogenase [OS=Triticum aestivum]	0	83.185	56	15	196	2	1	416	43.7	8.27	655	758	131.3	170.78	15	14	15	15	metabolic process		catalytic activity;nucleotide binding	Pf00044, Pf01113, Pf02800		TRIAE_CS42_6DS_TGACv1_542766_AA1729850			13	1.118	0.16	0.386667	0.943753	25.5	25.507	96.4	103.6	4.74	6.51	3	3	98.5	96.8	90	104.1	112.1	98.5
High	Master Protein	W5HZE9	Uncharacterized protein [OS=Triticum aestivum]	0	83.166	42	14	156	2	1	423	47.1	8.97	776	447	168.66	109.08	14	14	11	11	metabolic process;response to stimulus	cytoplasm	catalytic activity;nucleotide binding;RNA binding	Pf00004, Pf00910, Pf01057, Pf01078, Pf05496, Pf06068, Pf06414, Pf07724, Pf07726, Pf07728, Pf13191, Pf13207, Pf13401		TRIAE_CS42_7AL_TGACv1_558567_AA1794380; TRIAE_CS42_7BL_TGACv1_578177_AA1890630; TRIAE_CS42_7DL_TGACv1_603339_AA1981300			0	0.501	-1	0.136271	0.76343	10.46	18.229	133.2	66.8	16.04	36.95	3	3	133.3	103.1	141.5	66.8	51	104.3
High	Master Protein	A0A1D6BEQ2	Uncharacterized protein [OS=Triticum aestivum]	0	83.007	49	16	194	16	1	484	52.4	7.06	742	684	145.52	167.86	15	14	15	13	metabolic process		catalytic activity	Pf00278, Pf01168, Pf02784		TRIAE_CS42_6DS_TGACv1_543312_AA1738350			0	1.241	0.31	0.212802	0.867704	27.37	26.554	91.9	108.1	8.8	4.56	3	3	82.4	93.2	98.1	113.3	103.5	109.5
High	Master Protein	A0A1D6AEC8	Uncharacterized protein [OS=Triticum aestivum]	0	82.947	81	11	218	1	1	156	16.5	5.06	611	807	162.35	180.57	8	8	11	11	cellular homeostasis;metabolic process;regulation of biological process		catalytic activity	Pf00578, Pf08534		TRIAE_CS42_6AS_TGACv1_485365_AA1544200			0	1.094	0.13	0.471889	0.957414	70.82	19.8576	95.5	104.5	69.13	16.77	3	3	180	94	37.5	77.8	107.9	102.9
High	Master Protein	A0A1D5UR59	Uncharacterized protein [OS=Triticum aestivum]	0	82.849	48	15	178	2	1	511	55.5	7.64	335	330	128.62	145.02	14	13	14	13			catalytic activity	Pf00155, Pf00202		TRIAE_CS42_2DL_TGACv1_160337_AA0549460			0	0.902	-0.15	0.914818	0.991839	51.36	18.482	105.1	94.9	46.91	39.24	3	3	163.3	93.8	65.3	84.7	132.1	60.8
High	Master Protein	A0A077RY78	Uncharacterized protein [OS=Triticum aestivum]	0	82.777	52	15	215	15	1	431	46.3	6.3	1178	1118	205.48	171.68	15	15	15	14	metabolic process	cytoplasm	catalytic activity	Pf00923					0	0.729	-0.46	0.122437	0.72774	11.82	27.2446	113.7	86.3	11.37	3.3	3	3	131.9	111.4	107.1	80.1	85.1	84.5
High	Master Protein	A6Q0N9	putative acyl transferase 4 [OS=Triticum aestivum]	0	82.771	48	14	190	2	1	419	46.4	6.05	316	369	136.44	126.19	13	13	14	14			catalytic activity	Pf02458		TRIAE_CS42_3AS_TGACv1_213167_AA0705780			0	1.287	0.36	0.184044	0.82162	38.97	20.2939	82	118	37.91	12.63	3	3	66.9	77	131.6	93.4	110.8	120.3
High	Master Protein	A0A1D6B2M0	Succinate--CoA ligase [ADP-forming] subunit beta, mitochondrial [OS=Triticum aestivum]	0	82.756	43	15	196	15	1	422	45.2	6.92	707	608	154.73	157.6	14	14	13	12	metabolic process	mitochondrion	catalytic activity;metal ion binding;nucleotide binding	Pf00549, Pf08442, Pf13549		TRIAE_CS42_6DL_TGACv1_526324_AA1679520; TRIAE_CS42_6AL_TGACv1_474572_AA1535460; TRIAE_CS42_6BL_TGACv1_500559_AA1606490			0	0.884	-0.18	0.593555	0.970428	19.68	26.4787	107.6	92.4	5.61	2.88	3	3	114.9	106.1	103.3	89.7	91.2	94.8
High	Master Protein	A0A1D5RUT6	Uncharacterized protein [OS=Triticum aestivum]	0	82.713	50	17	178	17	1	585	61.9	7.81	287	307	99.54	151.17	15	15	17	17	metabolic process		catalytic activity	Pf00996, Pf01593, Pf13450		TRIAE_CS42_1AL_TGACv1_001387_AA0029780			0	1.416	0.5	0.0418429	0.467258	35.45	24.815	91.1	108.9	13.04	14.5	3	3	71.3	90.7	89.8	135.4	107.5	105.3
High	Master Protein	A0A1D5YM91	Alpha-mannosidase [OS=Triticum aestivum]	0	82.683	27	18	175	5	1	1018	113.7	5.92	321	437	129.99	146.34	17	17	17	17	metabolic process		catalytic activity;metal ion binding	Pf01074, Pf07748, Pf09261		TRIAE_CS42_5AL_TGACv1_376386_AA1236110			0	1.016	0.02	0.564605	0.962	19.93	21.851	97.4	102.6	7.92	38.9	3	3	115.6	99.7	102.8	108.4	52.4	121.1
High	Master Protein	A0A1D5VDS2	Uncharacterized protein [OS=Triticum aestivum]	0	82.58	80	11	207	4	1	213	23.3	6.43	676	414	165.16	125.1	11	11	11	11			protein binding	Pf00043, Pf02798, Pf13409, Pf13410, Pf13417, Pf14497		TRIAE_CS42_3AL_TGACv1_196283_AA0659090			10	0.872	-0.2	0.545604	0.960298	27.75	26.6545	105.4	94.6	9.04	3.43	3	3	101.9	101.2	118.3	90.6	96.5	91.5
High	Master Protein	A0A1D6C5Q3	Uncharacterized protein [OS=Triticum aestivum]	0	82.295	27	15	192	6	1	776	80.4	5.25	603	610	141.24	162.69	13	14	15	15	transport	membrane	catalytic activity;transporter activity	Pf03030		TRIAE_CS42_7BL_TGACv1_577494_AA1876920			0	1.214	0.28	0.217028	0.872609	50.09	23.3616	92.9	107.1	17.08	13.27	3	3	85.9	88.5	115.7	102.1	90.2	117.6
High	Master Protein	A0A1D6BF23	Uncharacterized protein [OS=Triticum aestivum]	0	82.228	35	17	194	4	1	530	59.3	4.97	433	523	140.81	145.08	14	14	16	14	metabolic process	endoplasmic reticulum;membrane	metal ion binding;protein binding	Pf00262		TRIAE_CS42_6DS_TGACv1_543448_AA1740240			5	1.055	0.08	0.580523	0.96801	26.27	25.0277	106.7	93.3	11.09	4.8	3	3	112.8	107.4	90.7	101.7	94	93.4
High	Master Protein	W5D4F5	Uncharacterized protein [OS=Triticum aestivum]	0	82.134	74	16	347	13	1	332	36.1	6.43	845	600	297.92	239.58	15	15	16	16	defense response;regulation of biological process;response to stimulus	cytoplasm;membrane	protein binding	Pf00400		TRIAE_CS42_3DL_TGACv1_250658_AA0871780			3	0.935	-0.1	0.812459	0.985276	30.74	27.4915	102.7	97.3	9.14	9.65	3	3	98.9	99.6	115.8	86.5	94.4	104.8
High	Master Protein	Q6XEB8	malate dehydrogenase [OS=Triticum aestivum]	0	82.123	81	14	283	1	1	227	24.3	7.09	940	774	237.52	181.93	12	13	13	13	metabolic process		catalytic activity	Pf00056, Pf02866	543356		LOC543356		0	0.696	-0.52	0.615003	0.976279	6.09	17.9017	117.9	82.1	37.46		3	1	126.5	240.6	137.3			95.6
High	Master Protein	W5AMP7	Uncharacterized protein [OS=Triticum aestivum]	0	81.997	68	16	188	6	1	358	38	5.88	582	416	145.7	133.53	16	16	15	15				Pf00190		TRIAE_CS42_1DS_TGACv1_080640_AA0251430			11	0.819	-0.29	0.351345	0.942528	13.49	26.7707	109.4	90.6	0.45	1.36	3	3	109.7	110	109.1	91.3	90.8	89
High	Master Protein	A0A1D6S0C4	Adenylosuccinate synthetase, chloroplastic [OS=Triticum aestivum]	0	81.874	53	21	142	19	1	488	53	7.85	382	435	97.28	96.14	17	16	17	17	metabolic process	cytoplasm	catalytic activity;metal ion binding;nucleotide binding	Pf00709, Pf09212		TRIAE_CS42_4DS_TGACv1_361678_AA1171480			2	1.189	0.25	0.243015	0.886441	33.14	24.9437	90.5	109.5	10.32	11.29	3	3	83	87	100.8	123.7	100.1	105.3
High	Master Protein	A0A1D5YIA9	Uncharacterized protein [OS=Triticum aestivum]	0	81.58	68	15	219	9	1	222	25	6.8	619	623	156.67	156.76	13	13	15	15			protein binding	Pf00043, Pf02798, Pf13409, Pf13410, Pf13417, Pf14497		TRIAE_CS42_5AL_TGACv1_375294_AA1219350			5	0.809	-0.31	0.319839	0.932342	19.9	27.6672	109.4	90.6	11.91	2.29	3	3	108.1	97.1	123.1	89.6	92.9	89.2
High	Master Protein	A0A1D6BU45	Uncharacterized protein [OS=Triticum aestivum]	0	81.562	46	10	1116	9	1	283	30.7	4.79	2017	2714	1010.38	946.19	10	10	10	10			RNA binding	Pf00076, Pf13893, Pf14259		TRIAE_CS42_7AS_TGACv1_569496_AA1817490			0	1.241	0.31	0.213086	0.867999	28.99	29.5176	85.6	114.4	5.04	5.59	3	3	83.8	92.3	86.2	115.1	117.2	105.4
High	Master Protein	A0A1D6DIC5	Uncharacterized protein [OS=Triticum aestivum]	0	81.473	51	15	183	1	1	479	51.8	8.09	397	438	144.12	129.96	14	15	12	12			catalytic activity	Pf00155, Pf00202		TRIAE_CS42_U_TGACv1_643245_AA2129610			0
High	Master Protein	A0A1D6AL50	Uncharacterized protein [OS=Triticum aestivum]	0	81.472	39	16	161	2	1	780	80.7	6.49	395	583	118.77	163.34	14	14	15	15	metabolic process		catalytic activity	Pf00082, Pf02225, Pf05922		TRIAE_CS42_6BL_TGACv1_499536_AA1585210			4	1.112	0.15	0.386811	0.943753	21.67	23.9879	95.3	104.7	6.7	4.6	3	3	99.2	87.1	96.1	110.9	101.1	105.7
High	Master Protein	A0A1D5YP67	dihydrolipoamide acetyltransferase component of pyruvate dehydrogenase complex [OS=Triticum aestivum]	0	81.47	45	14	189	2	1	515	53.1	9.44	505	488	142.43	133.28	13	13	14	14	metabolic process		catalytic activity	Pf00198, Pf00364, Pf02817		TRIAE_CS42_5AL_TGACv1_377171_AA1244670			16	0.992	-0.01	0.942112	0.993762	25.92	26.426	101.3	98.7	2.62	5.38	3	3	101.5	104.5	99.2	92.8	98.8	103.3
High	Master Protein	Q45NB7	Glutamine synthetase [OS=Triticum aestivum]	0	81.371	47	13	194	10	1	356	39.2	5.6	614	488	165.62	156.6	13	12	13	13	metabolic process		catalytic activity;nucleotide binding	Pf00120, Pf03951		TRIAE_CS42_6AL_TGACv1_470941_AA1499070			1	0.644	-0.64	0.0281683	0.365444	17.22	26.0088	128.4	71.6	20.39	22.34	3	3	127.3	93.6	141.5	67	71.1	99.5
High	Master Protein	P05151	Cytochrome f [OS=Triticum aestivum]	0	81.294	57	17	178	17	1	320	35.3	8.75	362	512	128.15	139.47	17	16	15	15	metabolic process;transport	membrane	metal ion binding	Pf01333	803113		petA		0	1.138	0.19	0.428092	0.945676	23.11	26.4805	88.6	111.4	12.48	12.27	3	3	89.1	107.4	85.6	114.9	91.1	112.1
High	Master Protein	Q00434	Oxygen-evolving enhancer protein 2, chloroplastic [OS=Triticum aestivum]	0	81.027	56	13	680	13	1	258	27.3	8.7	2377	2663	525.16	570.65	13	13	12	13	metabolic process	membrane	metal ion binding	Pf01789	543290		PsbP		0	1.173	0.23	0.341265	0.942528	31.64	29.3321	92.3	107.7	11.32	5.45	3	3	82.5	103	89.9	104.8	115	104.8
High	Master Protein	A0A1D6B0X0	Uncharacterized protein [OS=Triticum aestivum]	0	81.004	34	16	179	3	1	504	56.2	5.15	393	379	130.49	128.78	13	13	14	12	metabolic process	endoplasmic reticulum;membrane	metal ion binding;protein binding	Pf00262		TRIAE_CS42_6BS_TGACv1_515176_AA1667880			0	0.948	-0.08	0.846255	0.986776	40.36	20.464	100.5	99.5	16.16	36.22	3	3	116.2	114.7	85.9	114.8	113.6	54.9
High	Master Protein	W5D4D9	Uncharacterized protein [OS=Triticum aestivum]	0	80.709	80	11	211	4	1	213	23.4	6.04	497	457	146.31	132.48	11	10	11	11			protein binding	Pf00043, Pf02798, Pf13409, Pf13410, Pf13417, Pf14497		TRIAE_CS42_3B_TGACv1_221222_AA0734210			1	1.105	0.14	0.42755	0.945676	54.47	24.815	91.6	108.4	34.2	13.67	3	3	84.6	77.2	140.2	100.2	112.4	85.3
High	Master Protein	A0A1D5XZ59	Adenylosuccinate synthetase, chloroplastic [OS=Triticum aestivum]	0	80.691	46	15	161	2	1	486	52.1	6.7	532	506	126.1	121.14	15	13	14	14	metabolic process	cytoplasm	catalytic activity;metal ion binding;nucleotide binding	Pf00709		TRIAE_CS42_4DL_TGACv1_343092_AA1129380			0	1.014	0.02	0.60295	0.970619	20.54	22.2328	95	105	17.78	5.79	3	3	120.8	90.9	89	100.5	105.2	93.7
High	Master Protein	A0A077RTE5	Uncharacterized protein [OS=Triticum aestivum]	0	80.636	64	12	185	2	1	189	21.3	9.77	512	508	150.89	146.95	11	11	10	11	metabolic process	ribosome	RNA binding;structural molecule activity	Pf00347		TRIAE_CS42_3B_TGACv1_227779_AA0824680			0	1.127	0.17	0.37098	0.943753	35.03	24.9506	90.1	109.9	29.96	8.48	3	3	91.2	63.9	118.6	111.3	98.5	116.5
High	Master Protein	A0A1D5ZCL9	Uncharacterized protein [OS=Triticum aestivum]	0	80.589	68	13	201	7	1	222	25	6.8	599	448	154.73	149.23	12	11	11	11			protein binding	Pf02798, Pf13409, Pf13417		TRIAE_CS42_5BL_TGACv1_407952_AA1360610			0	0.766	-0.39	0.198483	0.844476	15.85	26.935	114.2	85.8	9.73	6.66	3	3	113.4	102.6	124.7	85.1	92.7	81.5
High	Master Protein	A0A1D5WI37	Uncharacterized protein [OS=Triticum aestivum]	0	80.402	45	17	193	6	1	505	53.3	5.67	793	819	147.06	177.39	14	14	17	17				Pf05368, Pf13460		TRIAE_CS42_3DL_TGACv1_250224_AA0864530			11	1.118	0.16	0.486386	0.957414	29.72	26.1957	95.3	104.7	11.06	8.16	3	3	96.3	103	82.6	114.7	105.9	97.4
High	Master Protein	A0A1D5TCY2	Uncharacterized protein [OS=Triticum aestivum]	0	80.326	43	14	187	2	1	533	57	6.1	564	778	141.58	164.54	13	13	14	14	metabolic process		catalytic activity	Pf00171		TRIAE_CS42_2AL_TGACv1_094782_AA0303040			0	0.892	-0.16	0.945465	0.994243	12.32	22.4899	105	95	5.33	8.29	3	3	110.5	99.7	108.1	97.8	98.9	84.9
High	Master Protein	W5H1Q1	citrate synthase [OS=Triticum aestivum]	0	80.257	47	15	193	1	1	472	52.5	7.61	571	613	148.7	155.43	14	13	11	11	metabolic process		catalytic activity	Pf00285		TRIAE_CS42_6DS_TGACv1_542594_AA1724870			0
High	Master Protein	W5EK41	Uncharacterized protein [OS=Triticum aestivum]	0	80.058	59	14	160	1	1	376	39.8	8.38	656	569	134.25	137.37	14	14	12	12	metabolic process		catalytic activity	Pf00698		TRIAE_CS42_4DL_TGACv1_343777_AA1139610			0	1.199	0.26	0.283205	0.918961	26.27	20.3264	90.9	109.1	24.14	2.46	3	3	74.8	88.1	119.1	105.6	108.8	103.6
High	Master Protein	W5ASA4	Uncharacterized protein [OS=Triticum aestivum]	0	80.039	53	5	263	5	1	154	17.4	10.27	711	562	261.98	209.27	5	5	4	4	metabolic process	ribosome	RNA binding;structural molecule activity	Pf00203		TRIAE_CS42_2DL_TGACv1_162453_AA0562830; TRIAE_CS42_2BS_TGACv1_146026_AA0453440; TRIAE_CS42_5AS_TGACv1_392611_AA1262120			0	0.875	-0.19	0.642768	0.981183	28.82	25.5917	104.7	95.3	10.78	9.9	3	3	93.7	108.5	116.3	83.1	98.7	99.7
High	Master Protein	A0A1D5TXJ7	Uncharacterized protein [OS=Triticum aestivum]	0	80.027	50	13	180	2	1	388	41.1	9.38	461	436	137.2	110.33	13	13	10	11	metabolic process		catalytic activity	Pf00106		TRIAE_CS42_2BL_TGACv1_129961_AA0400500			0	0.855	-0.23	0.837731	0.986776	35.3	21.1772	112.7	87.3	37.74	7.52	3	3	149	112.3	66.6	98.5	87	86.5
High	Master Protein	A0A1D5ZLH6	Uncharacterized protein [OS=Triticum aestivum]	0	79.976	71	17	283	5	1	299	32	7.72	688	742	217.05	230.35	16	16	16	16	metabolic process		catalytic activity	Pf00121		TRIAE_CS42_5DL_TGACv1_433285_AA1408290			13	1.261	0.34	0.18329	0.820015	24.66	27.7543	93	107	4.08	8.36	3	3	97.1	89.6	94.7	113.2	109.1	96.2
High	Master Protein	A0A1D5T3J1	Dihydrolipoyl dehydrogenase [OS=Triticum aestivum]	0	79.907	43	12	146	9	1	505	52.9	7.96	171	361	73.71	129.9	11	11	12	12	cellular homeostasis;metabolic process;regulation of biological process		catalytic activity;nucleotide binding	Pf00070, Pf02852, Pf07992		TRIAE_CS42_1DS_TGACv1_080858_AA0254720			0	2	1	0.000195933	0.00681594	24.17	24.6424	68.9	131.1	9.69	9.68	3	3	62.7	76.2	71	139.2	135.1	115.7
High	Master Protein	A0A1D6RZL4	Uncharacterized protein [OS=Triticum aestivum]	0	79.877	52	18	149	3	1	540	58	5.41	302	349	90.77	106.01	15	16	14	15	metabolic process	cytoplasm	nucleotide binding;protein binding	Pf00118		TRIAE_CS42_4DL_TGACv1_343232_AA1131900			0	0.86	-0.22	0.803963	0.984397	11.36	21.8958	109.5	90.5	17.96	11.68	3	3	117.6	84.6	118.1	81	101.7	97.1
High	Master Protein	A0A1D5WS85	Uncharacterized protein [OS=Triticum aestivum]	0	79.851	51	19	192	19	1	540	59	7.68	536	452	151.9	129.69	18	18	17	17	metabolic process		catalytic activity;metal ion binding;nucleotide binding;protein binding	Pf02670, Pf03447, Pf08436, Pf13288		TRIAE_CS42_3DS_TGACv1_271954_AA0911680			0	1.168	0.22	0.354007	0.942528	36.41	25.8918	86	114	22.31	7.55	3	3	78.3	81.3	115.1	107.7	100.6	116.9
High	Master Protein	W4ZUK2	Uncharacterized protein [OS=Triticum aestivum]	0	79.797	59	15	200	5	1	347	37.6	9.23	519	443	161.44	114.84	15	15	12	12	metabolic process		catalytic activity	Pf00106, Pf08659, Pf13561		TRIAE_CS42_1AS_TGACv1_020267_AA0076100			12	0.601	-0.73	0.0106345	0.187135	12.36	26.5212	125.2	74.8	8.57	15.75	3	3	116.7	123.4	137.8	85.8	73.7	62.5
High	Master Protein	A0A1D6RD30	Uncharacterized protein [OS=Triticum aestivum]	0	79.698	62	12	232	4	1	133	15.3	10.17	510	629	161.96	183.42	12	12	12	12	metabolic process	ribosome	structural molecule activity	Pf00833		TRIAE_CS42_1AL_TGACv1_001151_AA0026080			13	0.809	-0.3	0.320214	0.933026	22.36	27.2863	110.5	89.5	8.4	15.69	3	3	104.9	105.8	121.4	77.5	85.7	104.8
High	Master Protein	A0A1D5ZBP2	dihydrolipoamide acetyltransferase component of pyruvate dehydrogenase complex [OS=Triticum aestivum]	0	79.664	48	14	189	2	1	475	48.8	8.91	468	453	142.19	135.63	13	13	14	14	metabolic process		catalytic activity	Pf00198, Pf00364, Pf02817		TRIAE_CS42_5BL_TGACv1_407418_AA1356680			0	0.908	-0.14	0.915809	0.991839	16.97	23.3783	110.4	89.6	17.7	15.69	3	3	115.8	116	83.7	80.4	110.1	93.9
High	Master Protein	A0A1D5V8G3	Uncharacterized protein [OS=Triticum aestivum]	0	79.555	77	13	157	5	1	310	32.9	8.65	419	419	116.4	122.52	11	11	12	13	metabolic process		catalytic activity	Pf00332		TRIAE_CS42_3AL_TGACv1_194515_AA0634730			8	1.01	0.02	0.757545	0.98358	36.63	25.5732	108	92	23.12	20.68	3	3	124.5	77.9	113.3	113.4	96.5	74.3
High	Master Protein	A0A1D5V177	Uncharacterized protein [OS=Triticum aestivum]	0	79.554	53	12	145	11	1	415	46.2	6.07	426	285	128.02	93.75	12	12	8	9	metabolic process	cytoplasm	catalytic activity;nucleotide binding	Pf00004, Pf00006, Pf00910, Pf01057, Pf01078, Pf05496, Pf05673, Pf06068, Pf07724, Pf07726, Pf07728, Pf10236, Pf13191, Pf13401, Pf13604		TRIAE_CS42_2DS_TGACv1_178662_AA0599200			0	0.714	-0.49	0.170942	0.802535	16.16	24.7663	119.6	80.4	12.2	18.94	3	3	113.7	101.9	129.9	76.4	74.8	103.4
High	Master Protein	D2KZ12	3-ketoacyl-CoA thiolase-like protein [OS=Triticum aestivum]	0	79.527	46	13	186	2	1	459	47.9	7.96	545	606	145.26	147.85	13	13	13	13	metabolic process		catalytic activity	Pf00108, Pf02803	100682405	TRIAE_CS42_6DL_TGACv1_526455_AA1684200	TaSAG8		13	0.991	-0.01	0.817073	0.985276	24.48	25.3697	103	97	11.76	4.26	3	3	110.9	88.3	106.5	100.7	100.3	93.3
High	Master Protein	A0A1D5V7B0	pyruvate kinase [OS=Triticum aestivum]	0	79.441	42	15	160	2	1	577	62.9	6.37	578	610	129.88	139.34	13	13	15	12	metabolic process		catalytic activity;metal ion binding	Pf00224, Pf02887		TRIAE_CS42_3AL_TGACv1_194246_AA0629560			0	0.992	-0.01	0.654097	0.983028	16.18	21.8331	106.2	93.8	11.44	12.05	3	3	88.1	108.7	107.6	88.9	95	111.8
High	Master Protein	A0A077S3V2	aspartate aminotransferase [OS=Triticum aestivum]	0	79.39	45	16	153	2	1	454	49.5	8.22	569	567	114.07	117.41	13	13	13	13	metabolic process		catalytic activity	Pf00155		TRIAE_CS42_U_TGACv1_642143_AA2112250			0	0.74	-0.43	0.425932	0.944078	37.9	20.61	110.9	89.1	26.2	7.18	3	3	82.9	109.9	141.2	95.2	82.5	88.3
High	Master Protein	A0A1D6CB83	Uncharacterized protein [OS=Triticum aestivum]	0	79.066	59	14	291	5	1	334	37.4	5.31	1127	1074	239.46	234.46	14	14	13	14			catalytic activity;metal ion binding	Pf00903, Pf12681		TRIAE_CS42_7BL_TGACv1_579404_AA1907000			9	0.797	-0.33	0.283332	0.918961	20.79	28.1412	110.4	89.6	4.68	5.34	3	3	116.9	106.9	109.4	93.7	88.8	84.2
High	Master Protein	A0A1D5X453	Uncharacterized protein [OS=Triticum aestivum]	0	79.007	58	17	207	1	1	435	46.4	5.3	546	754	147.55	171.65	16	15	16	16	metabolic process		catalytic activity;nucleotide binding	Pf00070, Pf04820, Pf07992		TRIAE_CS42_4AL_TGACv1_289606_AA0973980			0	0.559	-0.84	0.0635797	0.543936	14.56	19.6279	128.3	71.7	58.96	30.56	3	3	189.4	137.2	45.1	52.6	99.1	76.7
High	Master Protein	A0A1D5YLF6	Uncharacterized protein [OS=Triticum aestivum]	0	78.687	55	15	171	6	1	480	51.3	4.48	564	460	151.66	95.84	14	15	11	11		nucleus	DNA binding	Pf01429		TRIAE_CS42_5AL_TGACv1_376129_AA1232390			9	0.5	-1	0.000441812	0.0135905	16.26	25.8735	121.1	78.9	35.19	37.19	3	3	183.8	109	99.8	42.5	71.1	93.9
High	Master Protein	A0A1D6AJG6	carboxypeptidase [OS=Triticum aestivum]	0	78.685	39	13	163	12	1	507	55.9	6.18	364	320	141.26	121.38	12	12	11	11	metabolic process		catalytic activity	Pf00450		TRIAE_CS42_6AS_TGACv1_488020_AA1574010			1	0.979	-0.03	0.889832	0.990309	20.15	25.5582	105.6	94.4	13.2	2.1	3	3	86.9	109.1	111.4	95.5	97.6	99.6
High	Master Protein	A0A1D5YUG2	Uncharacterized protein [OS=Triticum aestivum]	0	78.595	81	12	192	1	1	235	24.7	6.48	896	928	139.9	159.88	12	12	12	12				Pf00314		TRIAE_CS42_5AS_TGACv1_393516_AA1273520			0	0.823	-0.28	0.704303	0.983028	26.02	20.6655	109.7	90.3	75.21	20.85	3	3	122.7	165.7	16.9	76.5	117.2	100.9
High	Master Protein	A0A1D5XJ89	Uncharacterized protein [OS=Triticum aestivum]	0	78.58	68	10	151	3	1	220	23.6	4.37	840	773	117.06	117.37	8	10	6	8				Pf01849		TRIAE_CS42_4BL_TGACv1_320986_AA1053000			8	1.058	0.08	0.682093	0.983028	37.58	26.468	95.8	104.2	1.27	4.36	3	3	95.4	95.1	97.4	99.6	108.7	103.8
High	Master Protein	A0A1D5TCT8	Glutamyl-tRNA(Gln) amidotransferase subunit A, chloroplastic/mitochondrial [OS=Triticum aestivum]	0	78.468	41	16	154	2	1	541	56.9	6.23	556	813	112.1	140.7	14	14	15	15	cell organization and biogenesis;metabolic process	mitochondrion	catalytic activity;nucleotide binding	Pf01425		TRIAE_CS42_2AL_TGACv1_094745_AA0302480			0	1.256	0.33	0.105756	0.698949	16.34	21.1493	87.2	112.8	6.95	10.17	3	3	86.7	93.6	81.5	112.1	124.5	101.6
High	Master Protein	A0A1D6DME9	ATP synthase subunit gamma [OS=Triticum aestivum]	0	78.413	79	12	232	1	1	221	24.7	4.89	793	718	181.13	188.37	11	11	12	12	metabolic process;transport		catalytic activity;transporter activity	Pf00231		TRIAE_CS42_U_TGACv1_712630_AA2166950			0	0.644	-0.63	0.172846	0.805173	15.84	19.7202	121.6	78.4	35.23		2	1	171.7	285.6			142.7
High	Master Protein	A0A1D6SCD2	peptidylprolyl isomerase [OS=Triticum aestivum]	0	78.4	37	17	204	3	1	559	62	5.4	432	472	154.07	126.68	16	16	14	16	metabolic process		catalytic activity;protein binding	Pf00254, Pf00515, Pf07719, Pf12895, Pf13181, Pf13414, Pf13424, Pf13432, Pf14559		TRIAE_CS42_7AS_TGACv1_569082_AA1806720			14	0.807	-0.31	0.312973	0.93075	20.21	27.1098	108.7	91.3	8.67	7.09	3	3	119.3	105	101.5	87.2	88.2	98.9
High	Master Protein	W5GD60	Uncharacterized protein [OS=Triticum aestivum]	0	78.381	40	17	208	1	1	598	63.6	5.78	714	661	155.16	177.61	16	16	16	16	metabolic process	cytoplasm	nucleotide binding	Pf00118		TRIAE_CS42_6AS_TGACv1_485286_AA1542400			3	0.854	-0.23	0.794214	0.984397	24.19	19.9809	72.4	127.6	29.9	29.28	3	3	63.8	74.5	111.3	77.7	141.2	131.4
High	Master Protein	A0A1D5XDZ3	40S ribosomal protein SA [OS=Triticum aestivum]	0	78.377	35	12	208	4	1	378	40.8	6.37	733	763	154.44	144.79	11	11	12	11	cell organization and biogenesis;metabolic process	cytoplasm;ribosome	structural molecule activity	Pf00318		TRIAE_CS42_4AS_TGACv1_308100_AA1025780			10	0.979	-0.03	0.997521	0.99955	27.18	27.4938	101.4	98.6	10.84	10.15	3	3	105.5	90	111.5	86.3	102.6	104.2
High	Master Protein	A0A1D5ZZQ9	Uncharacterized protein [OS=Triticum aestivum]	0	78.234	52	13	157	4	1	380	39.4	6.68	508	373	135.84	131.75	12	12	11	11	metabolic process		catalytic activity	Pf00108, Pf02803		TRIAE_CS42_5DL_TGACv1_438628_AA1468560			1	0.955	-0.07	0.904633	0.990309	21.44	23.9255	102.2	97.8	17.55	7.04	3	3	124.7	97	90.2	92.9	103.8	91.4
High	Master Protein	A0A1D5TNM9	elongation factor 1-alpha [OS=Triticum aestivum]	0	78.216	37	12	214	4	1	447	49.1	9.13	401	464	126.93	155.71	11	11	12	12	metabolic process	cytoplasm	catalytic activity;nucleotide binding;RNA binding	Pf00009, Pf03143, Pf03144		TRIAE_CS42_2AS_TGACv1_113444_AA0356110			0	1.153	0.21	0.307394	0.927275	21.05	24.6033	92.9	107.1	9.74	7.19	3	3	84.7	90.3	102.3	104.2	102.1	116.4
High	Master Protein	A0A1D5VL53	Uncharacterized protein [OS=Triticum aestivum]	0	78.205	36	16	136	1	1	892	99.8	6.24	331	267	122.42	82.88	13	14	12	11	metabolic process;regulation of biological process	cytoplasm	catalytic activity;nucleotide binding	Pf00133, Pf01406, Pf09334		TRIAE_CS42_3AS_TGACv1_212254_AA0699190			0
High	Master Protein	A0A077S1E6	pyruvate kinase [OS=Triticum aestivum]	0	78.042	41	15	163	2	1	577	63	6.4	577	587	127.41	137.06	13	13	15	13	metabolic process		catalytic activity;metal ion binding	Pf00224, Pf02887					14	1.048	0.07	0.612361	0.975386	38.37	25.5677	97.2	102.8	20.64	9.32	3	3	84.4	91.6	123.1	93.2	96.9	110.9
High	Master Protein	A0A1D5XF06	Uncharacterized protein [OS=Triticum aestivum]	0	77.787	54	15	158	2	1	359	40.1	6.95	335	323	125.97	115.05	15	14	12	11				Pf14200		TRIAE_CS42_4AS_TGACv1_309280_AA1030680			13	0.738	-0.44	0.185809	0.825996	16.51	25.3826	118.7	81.3	13.2	20.27	3	3	134.6	103.1	119.5	64	81.9	96.8
High	Master Protein	A0A1D5WD22	Uncharacterized protein [OS=Triticum aestivum]	0	77.761	68	16	195	1	1	323	34.7	5.82	811	699	156.38	160.13	15	15	16	16	metabolic process		catalytic activity	Pf00294		TRIAE_CS42_3DL_TGACv1_249164_AA0840030			0	1.35	0.43	0.0482637	0.497673	36.81	21.4436	84.9	115.1	29.53	18.77	3	3	86.2	64.8	117.3	116.8	87.4	127.5
High	Master Protein	A0A1D5YRZ9	protoporphyrinogen oxidase [OS=Triticum aestivum]	0	77.752	58	19	160	1	1	531	56.4	9.22	555	539	119.23	136.83	15	15	18	18	metabolic process		catalytic activity	Pf01593, Pf13450		TRIAE_CS42_5AS_TGACv1_392538_AA1260290			16	1.303	0.38	0.104112	0.690833	34.17	25.2905	84.2	115.8	13.15	15.66	3	3	82.7	97.8	75.8	132.9	113.7	97.1
High	Master Protein	A0A1D5YIC0	Uncharacterized protein [OS=Triticum aestivum]	0	77.737	31	14	164	3	1	681	73.3	7.46	716	616	142.99	131.09	14	14	11	10	metabolic process	membrane	catalytic activity	Pf00933, Pf01915		TRIAE_CS42_5AL_TGACv1_375300_AA1219470			0	0.792	-0.34	0.517303	0.957414	17.5	21.4104	114	86	9.03	12.15	3	3	121.4	101.3	110.8	83.6	101.2	81.6
High	Master Protein	A0A1D5ZZ49	Uncharacterized protein [OS=Triticum aestivum]	0	77.66	58	14	168	7	1	464	49.6	4.55	545	400	129.12	107	13	14	11	12		nucleus	DNA binding	Pf01429, Pf05262		TRIAE_CS42_5DL_TGACv1_437091_AA1465090			0	0.602	-0.73	0.0339063	0.405675	17.94	23.5803	122.6	77.4	29.44	30.8	3	3	169.4	107.1	102.9	54.4	67.7	98.5
High	Master Protein	Q6XPZ4	peptidyl-prolyl cis-trans isomerase [OS=Triticum aestivum]	0	77.621	53	10	186	3	1	245	25.9	9.57	486	503	124.59	134.54	10	10	10	10	metabolic process		catalytic activity	Pf00160		TRIAE_CS42_U_TGACv1_641583_AA2098780			9	1.103	0.14	0.529949	0.95927	31.33	27.7481	96.2	103.8	2.6	1.56	3	3	94.6	95.4	99.3	105.4	102.4	102.8
High	Master Protein	A0A0C4BIT2	Uncharacterized protein [OS=Triticum aestivum]	0	77.571	48	15	149	9	1	378	42.8	5.72	298	349	97.77	111.94	13	14	13	13	metabolic process		catalytic activity;nucleotide binding	Pf01073, Pf01370		TRIAE_CS42_1BL_TGACv1_031763_AA0120240; TRIAE_CS42_1AL_TGACv1_000482_AA0013200; TRIAE_CS42_1DL_TGACv1_062249_AA0211290			0	0.93	-0.11	0.936056	0.992737	23.95	24.9837	103.3	96.7	10.82	3.63	3	3	102.8	91.3	113.4	101.5	94.7	96.3
High	Master Protein	A0A1D5YHT7	Uncharacterized protein [OS=Triticum aestivum]	0	77.526	53	13	178	3	1	410	42.9	5.44	425	499	128.18	125.68	13	13	13	13	metabolic process		catalytic activity	Pf01266, Pf07992		TRIAE_CS42_5AL_TGACv1_375170_AA1217180			0	0.912	-0.13	0.969608	0.996939	20.43	22.8479	102.3	97.7	12.57	3.64	3	3	95.8	100.3	120.7	96.9	95.9	90.5
High	Master Protein	A0A1D6RCT7	Uncharacterized protein [OS=Triticum aestivum]	0	77.496	68	16	187	1	1	323	34.6	5.82	762	676	146.66	155.28	14	14	16	16	metabolic process		catalytic activity	Pf00294		TRIAE_CS42_1AL_TGACv1_000284_AA0008040			15	0.983	-0.02	0.980793	0.99817	23.8	26.4687	105.9	94.1	8.32	5.48	3	3	107.7	93	108.1	103	92.6	95.6
High	Master Protein	A0A1D5UBZ2	Uncharacterized protein [OS=Triticum aestivum]	0	77.454	67	13	179	4	1	373	40.7	5.67	427	400	137.46	121.87	12	13	11	12	metabolic process		catalytic activity;metal ion binding	Pf03171, Pf14226		TRIAE_CS42_2BS_TGACv1_147021_AA0476640			0	0.656	-0.61	0.10113	0.683328	14.79	23.4482	113.4	86.6	9.72	20.07	3	3	113.8	108.2	130.1	64.3	86.9	96.6
High	Master Protein	W5BNP0	Uncharacterized protein [OS=Triticum aestivum]	0	77.342	63	15	194	4	1	360	40.9	6.99	663	538	140.34	157.84	15	15	14	14	metabolic process	cytosol;Golgi	catalytic activity	Pf03214		TRIAE_CS42_2BS_TGACv1_147826_AA0487990			1	0.867	-0.21	0.87018	0.988843	19.92	22.1092	106.2	93.8	18.82	5.71	3	3	83.3	105.8	122.2	92.6	93.5	102.5
High	Master Protein	A0A0C4BJJ8	Uncharacterized protein [OS=Triticum aestivum]	0	77.285	47	14	153	14	1	494	53.1	7.61	524	563	134.63	125.1	14	14	13	12	metabolic process		catalytic activity	Pf00206, Pf10415		TRIAE_CS42_4AS_TGACv1_307458_AA1020520; TRIAE_CS42_4BL_TGACv1_321079_AA1054920			0	0.987	-0.02	0.834878	0.986701	18.43	25.0822	98.2	101.8	6.7	4.95	3	3	107.4	94.7	97.5	104.5	101.2	94.8
High	Master Protein	A0A1D5T4Y4	Uncharacterized protein [OS=Triticum aestivum]	0	77.277	40	12	212	1	1	386	41.8	9.26	614	663	169.31	182.84	12	12	12	12				Pf05368, Pf13460		TRIAE_CS42_1DS_TGACv1_081620_AA0261970			3	1.271	0.35	0.13266	0.755282	32.25	24.8304	95.1	104.9	11.51	9.33	3	3	99.2	80.1	97.9	117.5	97.4	108
High	Master Protein	A0A1D5Y4J1	Uroporphyrinogen decarboxylase [OS=Triticum aestivum]	0	77.143	56	13	202	1	1	393	43	7.02	372	378	144.94	168.69	13	13	12	12	metabolic process		catalytic activity	Pf01208, Pf12876		TRIAE_CS42_4DL_TGACv1_345711_AA1154220			0	1.24	0.31	0.163759	0.793897	25.82	22.4597	89.3	110.7	18.12	16.34	3	3	87.2	73.5	105.5	130.8	108.1	94.9
High	Master Protein	I3NM30	putative non-cyanogenic beta-glucosidase [OS=Triticum aestivum]	0	77.071	57	17	170	3	1	507	56.4	8.98	450	258	146.19	117.12	17	17	15	15	metabolic process		catalytic activity;protein binding	Pf00232		TRIAE_CS42_4DS_TGACv1_363201_AA1183500			12	0.685	-0.55	0.0975725	0.669967	12.78	25.0124	117.3	82.7	13.78	15.09	3	3	119.3	103.3	136.3	66.8	84.1	90.2
High	Master Protein	A0A125RLL8	MBD6-5AS [OS=Triticum aestivum]	0	76.877	56	12	139	7	1	435	45	4.49	498	494	130.86	102.46	11	11	8	8		nucleus	DNA binding	Pf01429		TRIAE_CS42_5AS_TGACv1_392775_AA1264320			0	0.523	-0.93	0.0139015	0.230532	15.67	22.7818	135.8	64.2	41.9	20.52	3	3	208	125.5	92.4	45.5	59.3	69.2
High	Master Protein	A0A1D6CW84	Uncharacterized protein [OS=Triticum aestivum]	0	76.827	64	14	208	1	1	263	28.9	8.22	656	570	163.27	163.4	12	12	14	14			protein binding	Pf02798, Pf13409, Pf13410, Pf13417, Pf14497		TRIAE_CS42_7DS_TGACv1_621452_AA2016070			14	1.22	0.29	0.247603	0.888177	23.37	26.4023	94.2	105.8	4.58	6.59	3	3	89.1	97.7	93.4	114.3	104.9	100.6
High	Master Protein	A0A1D5YNN8	Uncharacterized protein [OS=Triticum aestivum]	0	76.559	70	15	268	3	1	301	32.2	7.17	639	750	207.65	232.51	14	14	15	15	metabolic process		catalytic activity	Pf00121		TRIAE_CS42_5AL_TGACv1_376895_AA1242150			0	1.141	0.19	0.301194	0.922441	26.05	23.8269	94.9	105.1	10.47	7.67	3	3	81.4	97.5	98.8	107.9	115.4	98.9
High	Master Protein	W5FLA4	Uncharacterized protein [OS=Triticum aestivum]	0	76.476	57	13	156	5	1	446	46.3	4.49	473	477	146.46	117.59	12	11	9	8		nucleus	DNA binding	Pf01429		TRIAE_CS42_5BS_TGACv1_423954_AA1385330			0	0.514	-0.96	0.013219	0.221424	13.81	22.9067	133.5	66.5	14.31	26.32	3	3	147.8	125.7	111.4	59.1	62.6	93.4
High	Master Protein	A0A1D6CEQ4	Probable alanine--tRNA ligase, chloroplastic [OS=Triticum aestivum]	0	76.474	28	19	165	5	1	1058	115.2	6.43	414	573	103.77	133.64	15	16	15	17	metabolic process	cytoplasm;mitochondrion	catalytic activity;metal ion binding;nucleotide binding;RNA binding	Pf01411, Pf07973		TRIAE_CS42_7BS_TGACv1_592029_AA1928700			14	1.188	0.25	0.223972	0.87917	30.9	24.4619	89.9	110.1	7.22	8.04	3	3	90.2	88.7	101.1	110.6	96.8	112.5
High	Master Protein	A0A1D5TNX5	Uncharacterized protein [OS=Triticum aestivum]	0	76.436	46	11	179	11	1	248	28.2	6.65	569	560	155.77	137.86	11	11	10	10						TRIAE_CS42_2AS_TGACv1_113540_AA0357430			0	1.083	0.11	0.596196	0.970428	27.75	27.0952	95.5	104.5	13.79	3.39	3	3	84	110.3	94.3	100.7	103.1	107.6
High	Master Protein	A0A1D5XE65	Adenylosuccinate synthetase, chloroplastic [OS=Triticum aestivum]	0	76.331	46	15	151	2	1	487	52.1	6.48	494	434	118.03	109.01	15	13	14	14	metabolic process	cytoplasm	catalytic activity;metal ion binding;nucleotide binding	Pf00709		TRIAE_CS42_4AS_TGACv1_308211_AA1026670			11	0.942	-0.09	0.99139	0.999304	21.1	24.7051	98.6	101.4	10.2	6.72	3	3	112.2	92.8	96.7	106.1	99.5	92.8
High	Master Protein	A6Q0N8	Putative acyl transferase 3 [OS=Triticum aestivum]	0	76.309	52	15	177	1	1	434	48	6.06	312	437	120.61	116.13	14	13	15	13			catalytic activity	Pf02458	100125732		acT3		17	0.978	-0.03	0.913639	0.991839	38.73	25.6402	108	92	21.01	4.55	3	3	110.4	82	126	94.1	89.4	98
High	Master Protein	A0A1D5WYB6	Uncharacterized protein [OS=Triticum aestivum]	0	76.285	40	17	164	1	1	743	80.2	6.79	463	596	110.78	141.46	15	16	16	15	metabolic process	membrane	catalytic activity	Pf00111, Pf00384, Pf09326, Pf10588, Pf13510		TRIAE_CS42_4AL_TGACv1_288275_AA0943380			16	1.113	0.15	0.400995	0.943753	23.76	24.7106	90.6	109.4	5.29	10.07	3	3	99.1	89.2	93.1	112.4	93.9	112.4
High	Master Protein	A0A1D5XSM0	Uncharacterized protein [OS=Triticum aestivum]	0	76.219	43	17	172	3	1	675	75.5	6.38	272	284	146.91	127.84	16	16	13	14	metabolic process		catalytic activity;metal ion binding	Pf00557, Pf01321		TRIAE_CS42_4BS_TGACv1_328855_AA1094780			14	0.889	-0.17	0.741189	0.983136	23.03	25.1638	109.8	90.2	2.64	12.27	3	3	107.9	102.6	106.8	107.6	87.4	87.7
High	Master Protein	A0A1D6CGP1	Uncharacterized protein [OS=Triticum aestivum]	0	76.021	26	16	188	7	1	781	81.2	5.25	647	527	136.83	148.6	14	15	16	16	transport	membrane	catalytic activity;transporter activity	Pf03030		TRIAE_CS42_7BS_TGACv1_592527_AA1939830			9	0.949	-0.08	0.873147	0.989629	39.44	26.2149	102.5	97.5	16.95	13.34	3	3	94.8	94.9	125.7	90.4	85.1	109.1
High	Master Protein	W5EKW5	Uncharacterized protein [OS=Triticum aestivum]	0	75.959	41	15	172	0	1	480	52.6	8.07	434	354	120.79	114.82	15	14	14	13	metabolic process		catalytic activity;metal ion binding	Pf00067		TRIAE_CS42_4DL_TGACv1_342936_AA1125650			2	0.703	-0.51	0.293658	0.922441	22.35	20.2716	126.2	73.8	21.47	30.32	3	3	134.5	87	121.4	115.7	70.4	71
High	Master Protein	A0A1D5XUI4	Uncharacterized protein [OS=Triticum aestivum]	0	75.929	40	17	160	1	1	741	80.1	6.64	439	583	103.81	136.63	15	16	16	15	metabolic process	membrane	catalytic activity	Pf00111, Pf00384, Pf09326, Pf10588, Pf13510		TRIAE_CS42_4BS_TGACv1_329948_AA1104870			0	1.123	0.17	0.421388	0.943753	12.79	19.9994	93.4	106.6	8.8	10.5	3	3	93	103.5	87.1	106.2	94.1	116.2
High	Master Protein	A0A1D5URM3	Glutamyl-tRNA(Gln) amidotransferase subunit B, chloroplastic/mitochondrial [OS=Triticum aestivum]	0	75.866	36	12	166	1	1	546	60.6	6.43	609	707	129.33	151.78	12	12	12	12	cell organization and biogenesis;metabolic process	mitochondrion	catalytic activity;nucleotide binding	Pf02637, Pf02934		TRIAE_CS42_2DL_TGACv1_160509_AA0551270			0	0.836	-0.26	0.702173	0.983028	7.79	20.1404	108.9	91.1	22.66	5.71	3	3	77.6	121.4	115.4	96.5	99.9	89.2
High	Master Protein	W4ZLQ8	Uncharacterized protein [OS=Triticum aestivum]	0	75.575	53	14	185	3	1	394	43.3	7.47	422	399	144.48	132.38	14	14	14	14				Pf00557		TRIAE_CS42_1AL_TGACv1_001695_AA0034100			12	0.774	-0.37	0.220128	0.87551	13.68	26.5038	108.9	91.1	7.27	5.8	3	3	121.4	107.4	107.1	82.2	89.9	91.9
High	Master Protein	W5FMA5	protoporphyrinogen oxidase [OS=Triticum aestivum]	0	75.525	54	18	160	1	1	531	56.3	9.14	546	597	111.44	138.9	14	14	17	18	metabolic process		catalytic activity	Pf01593, Pf13450		TRIAE_CS42_5BS_TGACv1_424877_AA1392050			0	0.924	-0.11	0.915076	0.991839	0.23	20.9949	103.9	96.1		9.52	1	3		152.6		165.5	140.8	141.1
High	Master Protein	A0A1D6S529	Uncharacterized protein [OS=Triticum aestivum]	0	75.465	39	18	153	2	1	771	82.3	7.14	412	498	112.36	115.13	17	15	16	16		nucleus	catalytic activity;metal ion binding;nucleotide binding;RNA binding	Pf00098, Pf00270, Pf00271, Pf08152, Pf14617		TRIAE_CS42_5DL_TGACv1_433011_AA1398000			0	1.019	0.03	0.589983	0.970428	20.16	21.2638	111.3	88.7	13.71	19.47	3	3	111.3	111.1	86.8	83.7	88.5	118.5
High	Master Protein	A0A1D5XNQ5	Uroporphyrinogen decarboxylase [OS=Triticum aestivum]	0	75.312	56	13	195	1	1	393	42.9	7.02	373	375	140.42	168.1	13	13	12	12	metabolic process		catalytic activity	Pf01208, Pf12876		TRIAE_CS42_4BL_TGACv1_322904_AA1073360			12	1.281	0.36	0.158609	0.792321	34.26	26.4468	89.5	110.5	16.26	5.05	3	3	75.2	104.4	89.5	115.8	110.5	104.6
High	Master Protein	A0A096UT91	Uncharacterized protein [OS=Triticum aestivum]	0	75.201	50	14	176	4	1	244	28.3	10.01	411	467	131.92	124.81	12	12	12	13				Pf00327, Pf08079		TRIAE_CS42_5DL_TGACv1_433812_AA1422790			10	1.088	0.12	0.577917	0.966636	39.67	27.1895	92.1	107.9	7.32	5.97	3	3	89.6	90.2	101.8	100.1	112.7	105.6
High	Master Protein	Q84LA1	fructan 1-exohydrolase w2 [OS=Triticum aestivum]	0	75.093	31	17	176	1	1	596	66.6	5.08	274	198	122.4	110.47	17	16	15	15	metabolic process		catalytic activity	Pf00251, Pf08244	543441	TRIAE_CS42_U_TGACv1_643531_AA2132820	1-FEH		16	1.136	0.18	0.433773	0.947861	24.97	26.5878	97.1	102.9	8.96	1.78	3	3	87.6	97.9	104.8	101.2	103.8	104.7
High	Master Protein	A0A1D5ZJY6	Lysine--tRNA ligase [OS=Triticum aestivum]	0	75.082	36	16	143	2	1	609	68.5	5.82	350	500	105.27	118	16	16	13	13	metabolic process	cytoplasm	catalytic activity;nucleotide binding	Pf00152, Pf01336		TRIAE_CS42_5DL_TGACv1_433087_AA1401430			0	0.754	-0.41	0.444912	0.950732	15.94	21.0154	125	75	35.62	7.5	3	3	162	128.8	75.7	77.2	84	72.3
High	Master Protein	A0A1D6BUL1	Uncharacterized protein [OS=Triticum aestivum]	0	75.081	51	13	217	1	1	324	35.7	9.07	677	810	168.82	177.69	12	12	13	13			protein binding	Pf02798, Pf13409, Pf13410, Pf13417, Pf14497		TRIAE_CS42_7AS_TGACv1_569590_AA1819870			0	1.002	0	0.661934	0.983028	15.9	22.5941	99.9	100.1	18.46	6.46	3	3	106.3	108.6	76.5	106.6	106.8	95.2
High	Master Protein	A0A1D5SS63	Uncharacterized protein [OS=Triticum aestivum]	0	75.075	37	14	174	2	1	636	70.1	8.13	390	505	140.27	145.22	14	14	14	14	metabolic process		catalytic activity	Pf01077, Pf03460		TRIAE_CS42_1DL_TGACv1_061476_AA0196370			13	1.077	0.11	0.52128	0.957414	20.08	25.6004	94.1	105.9	13.18	0.82	3	3	83.4	93.2	108.2	106	104.4	104.8
High	Master Protein	A0A1D5SEB1	Uncharacterized protein [OS=Triticum aestivum]	0	74.946	34	15	178	2	1	501	56.5	5.38	560	494	130.28	130.44	14	13	14	13	metabolic process		catalytic activity	Pf00398, Pf01209, Pf01739, Pf02353, Pf05175, Pf05891, Pf07021, Pf08241, Pf08242, Pf12847, Pf13489, Pf13649, Pf13659, Pf13847		TRIAE_CS42_1BL_TGACv1_032207_AA0126810			0	0.875	-0.19	0.899464	0.990309	32.69	22.0414	111.9	88.1	3.5	12.01	3	3	103.9	111.1	109.5	86.2	84.8	104.6
High	Master Protein	A0A0C4BK41	Uncharacterized protein [OS=Triticum aestivum]	0	74.936	49	16	150	2	1	426	47.6	6.01	288	321	103.45	100.65	13	12	12	11	metabolic process;regulation of biological process	cytoplasm;membrane	catalytic activity;nucleotide binding;protein binding	Pf00004, Pf00158, Pf06414, Pf07724, Pf07726, Pf07728, Pf13191, Pf13401		TRIAE_CS42_6AL_TGACv1_472569_AA1523720; TRIAE_CS42_6DL_TGACv1_527169_AA1699870; TRIAE_CS42_6BL_TGACv1_500631_AA1607640			16	0.74	-0.43	0.202889	0.853562	16.13	25.1508	122.2	77.8	17.67	8.39	3	3	137.8	96.3	123.2	78.4	75.7	88.6
High	Master Protein	W5ECL8	Uncharacterized protein [OS=Triticum aestivum]	0	74.884	43	14	150	1	1	769	78.6	6.42	368	464	98.4	118.19	12	11	13	13	metabolic process		catalytic activity	Pf00082, Pf02225, Pf05922		TRIAE_CS42_4BS_TGACv1_328812_AA1094010			14	1.059	0.08	0.563663	0.962	26.1	24.9418	97.7	102.3	12.5	8.17	3	3	84.3	96.5	108.3	96.9	113.1	101
High	Master Protein	A0A1D5YBJ4	Uncharacterized protein [OS=Triticum aestivum]	0	74.809	40	11	1032	1	1	293	31.9	4.56	2341	2741	935.84	1035.63	10	9	10	9			RNA binding	Pf00076, Pf13893, Pf14259		TRIAE_CS42_5AL_TGACv1_374059_AA1189050			0	0.966	-0.05	0.875752	0.989699	43.67	24.2335	82.4	117.6	37.19	18.24	3	3	74.5	132.1	70.8	88.5	127.7	106.3
High	Master Protein	O80370	Dirigent protein [OS=Triticum aestivum]	0	74.641	60	14	197	14	1	300	32.4	7.18	667	914	149.92	174.59	13	13	13	13		extracellular	catalytic activity	Pf01419, Pf03018	732703		ver2		0	1.098	0.13	0.547197	0.960787	30.71	27.8984	95	105	11.02	4.44	3	3	91.2	91.5	110	107.5	98.7	101.1
High	Master Protein	A0A1D6RFY9	Uncharacterized protein [OS=Triticum aestivum]	0	74.63	42	11	156	3	1	449	47.7	8.31	416	443	111.26	122.03	10	11	10	10			catalytic activity	Pf02458		TRIAE_CS42_1DL_TGACv1_062269_AA0211630			0	0.803	-0.32	0.560682	0.962	21.32	22.8141	108.3	91.7	8.08	18.7	3	3	109.1	104.1	121.6	70.3	92.3	102.7
High	Master Protein	A0A1D6B301	Uncharacterized protein [OS=Triticum aestivum]	0	74.56	60	11	247	1	1	250	26.7	4.78	509	710	179.8	230.34	10	10	11	11	metabolic process;transport	membrane	catalytic activity;transporter activity	Pf00213		TRIAE_CS42_6DL_TGACv1_526376_AA1681230			0	1.46	0.55	0.0421518	0.469151	14.63	22.6523	80.7	119.3	10.21	11.75	3	3	81.7	89.8	73.1	131.1	120.7	103.5
High	Master Protein	A0A1D5V4N4	Uncharacterized protein [OS=Triticum aestivum]	0	74.498	48	16	182	1	1	498	52.5	5.83	775	801	147.68	167.45	15	13	16	16				Pf05368, Pf13460		TRIAE_CS42_3AL_TGACv1_193670_AA0617210			3	1.239	0.31	0.171732	0.803554	17.55	24.6011	93	107	11.75	8.91	3	3	95.2	95.7	77.3	120.9	109.6	101.3
High	Master Protein	A0A1D5W7I4	ribosomal protein [OS=Triticum aestivum]	0	74.472	43	9	154	6	1	216	24.6	9.83	401	332	117.34	105	9	9	9	9	metabolic process	ribosome	RNA binding;structural molecule activity	Pf00687		TRIAE_CS42_3B_TGACv1_225233_AA0806390; TRIAE_CS42_3DL_TGACv1_249792_AA0856390; TRIAE_CS42_3AL_TGACv1_196834_AA0663140			0	1.02	0.03	0.665415	0.983028	48.09	24.2366	101.1	98.9	20.66	16.91	3	3	92.5	88.4	127	90.4	85.5	116.2
High	Master Protein	A0A1D6AK13	Uncharacterized protein [OS=Triticum aestivum]	0	74.445	43	12	166	2	1	460	47.9	8.1	448	511	128.86	130.93	12	12	12	12	metabolic process		catalytic activity	Pf00108, Pf02803		TRIAE_CS42_6BL_TGACv1_499343_AA1578600			0	0.905	-0.14	0.974131	0.996973	22.99	22.0756	106.6	93.4	5.69	11.43	3	3	108.5	98	108.1	106.1	84.4	94.8
High	Master Protein	A0A1D5Z5G2	Uncharacterized protein [OS=Triticum aestivum]	0	74.383	38	18	146	2	1	804	86.2	7.96	400	450	110.63	102.47	17	15	16	16		nucleus	catalytic activity;nucleotide binding;RNA binding	Pf00270, Pf00271, Pf08152, Pf14617		TRIAE_CS42_5BL_TGACv1_405472_AA1328050			17	1.086	0.12	0.477638	0.957414	25.88	25.0677	96.9	103.1	9.44	16.71	3	3	87.2	93.7	104.9	90.3	99.7	124.2
High	Master Protein	W5BHQ3	Uncharacterized protein [OS=Triticum aestivum]	0	74.318	53	14	189	6	1	430	46.5	5.17	607	590	142.89	153.98	14	14	14	14			catalytic activity	Pf02458		TRIAE_CS42_2BL_TGACv1_132301_AA0436610			9	0.813	-0.3	0.447323	0.951507	19.52	25.2907	110.5	89.5	13.13	6.74	3	3	106.9	98.7	127	84.9	96	86.5
High	Master Protein	W5B9Z5	Uncharacterized protein [OS=Triticum aestivum]	0	74.316	52	14	181	2	1	244	28.1	10.05	408	498	130.8	134.01	12	13	13	14				Pf00327, Pf08079		TRIAE_CS42_2BL_TGACv1_132165_AA0435730			2	0.824	-0.28	0.514835	0.957414	18.23	24.5973	106.3	93.7	16.15	19.95	3	3	116.2	108.7	84.4	78.1	116.7	95.9
High	Master Protein	A0A1D6ABX5	Uncharacterized protein [OS=Triticum aestivum]	0	74.23	60	11	251	1	1	250	26.6	4.78	509	713	187.21	228.91	11	11	11	11	metabolic process;transport	membrane	catalytic activity;transporter activity	Pf00213		TRIAE_CS42_6AL_TGACv1_473264_AA1529760			12	1.39	0.47	0.0661658	0.557051	45.64	27.7651	86.5	113.5	24.07	19	3	3	88.1	105.1	64	115.6	135.3	91.9
High	Master Protein	A0A1D6DAK0	Eukaryotic translation initiation factor 3 subunit B [OS=Triticum aestivum]	0	74.127	33	15	159	2	1	721	83.2	5.16	531	429	137.12	112.52	15	15	14	14	cell organization and biogenesis;metabolic process;regulation of biological process	cytoplasm	protein binding;RNA binding	Pf00076, Pf08662		TRIAE_CS42_U_TGACv1_641283_AA2090750			0	0.851	-0.23	0.792832	0.984397	14.22	22.0539	110	90	13.39	11.07	3	3	125.3	96	108.4	80.8	88.8	100.6
High	Master Protein	A0A1D5YZN1	Uncharacterized protein [OS=Triticum aestivum]	0	74.105	38	11	176	3	1	310	33.9	10.02	429	520	123.61	124.31	10	10	11	11	metabolic process	ribosome	RNA binding;structural molecule activity	Pf00069, Pf00333, Pf03719		TRIAE_CS42_5BL_TGACv1_404436_AA1299740			10	0.949	-0.08	0.873627	0.989629	35.3	27.5242	104.6	95.4	14.56	11.2	3	3	99.3	92.9	121.9	87.7	90.6	107.5
High	Master Protein	W5HPC1	60S acidic ribosomal protein P0 [OS=Triticum aestivum]	0	74.09	52	13	256	13	1	320	34.5	5.5	979	915	210.38	194.58	11	13	13	13		ribosome		Pf00428, Pf00466		TRIAE_CS42_7BL_TGACv1_577310_AA1871840; TRIAE_CS42_7DL_TGACv1_603431_AA1983580			0	0.894	-0.16	0.637128	0.9807	19.48	28.0138	104.5	95.5	1.57	5.43	3	3	105.2	102.4	105.2	90.3	96.1	100.7
High	Master Protein	A0A1D5ZV85	dihydrolipoamide acetyltransferase component of pyruvate dehydrogenase complex [OS=Triticum aestivum]	0	74.044	41	13	179	1	1	474	48.6	8.75	422	420	134.99	127.71	12	12	13	13	metabolic process		catalytic activity	Pf00198, Pf00364, Pf02817		TRIAE_CS42_5DL_TGACv1_435278_AA1448290			0	0.995	-0.01	0.672882	0.983028	11.72	22.3296	103.5	96.5	5.84	9.52	3	3	102.6	93.6	104.5	95.6	110.6	93
High	Master Protein	A0A1D5S865	Uncharacterized protein [OS=Triticum aestivum]	0	73.928	68	10	176	10	1	222	24	4.73	952	792	163.98	136.66	10	9	9	9	transport			Pf00638		TRIAE_CS42_1BL_TGACv1_030659_AA0097110			0	0.714	-0.49	0.0980014	0.671985	21.49	26.0806	120.7	79.3	30.5	13.26	3	3	152.2	119.2	80.7	74.4	78.3	95.1
High	Master Protein	W5EI90	Uncharacterized protein [OS=Triticum aestivum]	0	73.736	56	15	153	2	1	347	38.7	6.77	322	336	121.44	105.17	15	14	12	11				Pf14200		TRIAE_CS42_4DL_TGACv1_342407_AA1112860			0	0.592	-0.76	0.0396213	0.448479	10.23	21.3538	110.4	89.6	12.87	41.78	3	3	140.8	111	116.6	40	96.9	94.7
High	Master Protein	Q84PN8	Fructan 1-exohydrolase w1 [OS=Triticum aestivum]	0	73.704	29	16	172	1	1	597	66.6	5.16	302	274	119.22	113.91	16	16	14	14	metabolic process		catalytic activity	Pf00251, Pf08244		TRIAE_CS42_6AS_TGACv1_487805_AA1573030			0	1.133	0.18	0.314218	0.93075	13.07	22.1627	93.6	106.4	9.72	7.47	3	3	89.8	89.8	105.8	113.6	98.7	102.2
High	Master Protein	W5FPK0	Uncharacterized protein [OS=Triticum aestivum]	0	73.649	51	14	197	1	1	423	46.7	5.59	322	478	128.22	144.83	14	14	14	14				Pf08442		TRIAE_CS42_5DS_TGACv1_456913_AA1479890			0	0.669	-0.58	0.157422	0.792321	1.29	21.9873	119.8	80.2		11.54	1	3			191.8	128.3	125.8	154.2
High	Master Protein	A0A1D6RTR7	Uncharacterized protein [OS=Triticum aestivum]	0	73.645	60	12	176	2	1	202	22.6	9.88	453	444	141.32	142.69	10	10	11	11	metabolic process	ribosome	RNA binding;structural molecule activity	Pf00347		TRIAE_CS42_3DS_TGACv1_271549_AA0902350			11	1.033	0.05	0.777199	0.98358	28.31	27.2466	98.3	101.7	17.26	4.99	3	3	98.2	81.6	115.6	101.6	96.4	106.6
High	Master Protein	W5AVS5	Uncharacterized protein [OS=Triticum aestivum]	0	73.569	68	13	127	13	1	310	34.8	6.6	223	255	85.32	103.61	12	10	11	11			protein binding	Pf01398, Pf13012		TRIAE_CS42_2AL_TGACv1_094756_AA0302680; TRIAE_CS42_2BL_TGACv1_131923_AA0433560; TRIAE_CS42_2DL_TGACv1_159908_AA0544220			0	0.741	-0.43	0.202534	0.852718	22.96	25.0465	115.6	84.4	26.93	13.8	3	3	111	82.7	143.1	81.1	80.4	101.7
High	Master Protein	W5GYF2	Uncharacterized protein [OS=Triticum aestivum]	0	73.499	34	12	179	1	1	380	41.4	9.8	799	805	145.5	138.17	12	12	12	12	transport	membrane	transporter activity	Pf00153		TRIAE_CS42_6DL_TGACv1_527736_AA1708060			0	1.084	0.12	0.478589	0.957414	11.22	23.4602	96.4	103.6	8.67	13.15	3	3	103.8	87.9	92.5	121	95.2	99.5
High	Master Protein	A0A1D5TX99	Glutamyl-tRNA(Gln) amidotransferase subunit B, chloroplastic/mitochondrial [OS=Triticum aestivum]	0	73.421	36	12	164	1	1	546	60.5	6.29	618	699	131.98	150.17	12	12	12	12	cell organization and biogenesis;metabolic process	mitochondrion	catalytic activity;nucleotide binding	Pf02637, Pf02934		TRIAE_CS42_2BL_TGACv1_129918_AA0399390			13	1.057	0.08	0.565852	0.962	23.74	24.931	97	103	9.06	2.16	3	3	87	96.8	104.3	106.5	102.5	102.9
High	Master Protein	A0A1D6DBC3	Uncharacterized protein [OS=Triticum aestivum]	0	73.399	39	18	187	10	1	678	76.4	6.95	373	350	128.69	112.76	17	17	18	17				Pf01073, Pf01370, Pf02719, Pf04321, Pf07993		TRIAE_CS42_U_TGACv1_641429_AA2094850			9	0.79	-0.34	0.317443	0.930938	15.12	25.455	112.8	87.2	13.3	13.66	3	3	106.5	99.1	127.5	82.3	81.6	103
High	Master Protein	A0A1D5S607	Uncharacterized protein [OS=Triticum aestivum]	0	73.391	62	9	181	5	1	240	25.4	5.45	397	650	138.45	154.01	9	9	9	9			catalytic activity	Pf01738, Pf12695		TRIAE_CS42_1BL_TGACv1_030333_AA0087160			4	0.978	-0.03	0.997521	0.99955	24.58	26.7158	100.9	99.1	1.58	4.28	3	3	99.2	102.2	99.7	104.5	98	96.4
High	Master Protein	A0A1D5SNU7	Uncharacterized protein [OS=Triticum aestivum]	0	73.305	38	17	174	9	1	568	63.4	6.09	620	542	124.46	130.67	15	14	16	16	metabolic process	cytoplasm	catalytic activity;nucleotide binding	Pf00152, Pf00458, Pf01336		TRIAE_CS42_1BS_TGACv1_051274_AA0178920			9	0.891	-0.17	0.623235	0.979492	19.93	25.8858	107.9	92.1	4.22	6.55	3	3	106.6	104.1	112.9	91.1	86.7	98.7
High	Master Protein	A0A1D5SN87	Uncharacterized protein [OS=Triticum aestivum]	0	73.297	62	14	177	4	1	358	38.1	6.18	435	356	139.32	125.88	14	14	12	12				Pf00190		TRIAE_CS42_1BS_TGACv1_050809_AA0175810			0	0.78	-0.36	0.354231	0.942528	15.25	24.2109	116.3	83.7	4.32	3.43	3	3	112.7	116.3	122.7	83.6	79.6	85.1
High	Master Protein	A0A1D5ZTS6	Uncharacterized protein [OS=Triticum aestivum]	0	73.257	44	8	209	8	1	323	34.8	9.1	516	282	194.4	159.1	8	8	7	7	metabolic process		catalytic activity	Pf01182		TRIAE_CS42_5DL_TGACv1_434818_AA1442110			0	0.825	-0.28	0.447198	0.951507	15.75	25.4402	106.8	93.2	9.23	10.65	3	3	97.9	106.3	117.6	92.7	102.6	82.9
High	Master Protein	A0A1D6A5W4	Uncharacterized protein [OS=Triticum aestivum]	0	73.086	59	10	148	2	1	341	36.1	8.63	555	529	138.91	131.36	9	9	9	9	transport	membrane	transporter activity	Pf00230		TRIAE_CS42_6AL_TGACv1_471030_AA1501310			9	0.744	-0.43	0.242814	0.886441	28.85	24.6694	116.7	83.3	29.06	19.7	3	3	101.5	97.2	159.3	70.6	72.4	99
High	Master Protein	A0A077RQ49	Uncharacterized protein [OS=Triticum aestivum]	0	73.042	6	12	208	1	1	2476	274.2	6.65	746	680	162.31	171.1	12	11	11	11	metabolic process	nucleus	RNA binding	Pf00076, Pf00291, Pf00566, Pf08164, Pf13339					0
High	Master Protein	A0A1D5YUW4	Uncharacterized protein [OS=Triticum aestivum]	0	72.977	51	17	180	4	1	502	55.5	6.2	432	383	128.69	146.51	16	16	17	17	cell organization and biogenesis;metabolic process		catalytic activity;protein binding	Pf00150, Pf06229		TRIAE_CS42_5AS_TGACv1_393812_AA1276200			11	0.721	-0.47	0.177508	0.812647	10.19	24.9548	114.3	85.7	10.97	8.69	3	3	106.1	109.1	129.3	81.9	93.6	79.9
High	Master Protein	A0A075TNZ7	50S ribosomal protein L2, chloroplastic [OS=Triticum aestivum]	0	72.853	47	10	183	10	1	277	30.5	11.37	551	682	125.03	143.75	10	10	9	9	metabolic process	ribosome	catalytic activity;RNA binding;structural molecule activity	Pf00181, Pf03947					0	1.073	0.1	0.628197	0.980056	34.28	26.6257	104.7	95.3	7.74	13.2	3	3	90.7	103.8	104.3	91.2	115.6	94.5
High	Master Protein	A0A1D6B9B8	Uncharacterized protein [OS=Triticum aestivum]	0	72.852	35	17	133	1	1	774	83.3	6.74	226	327	96.45	98.92	16	16	17	16	metabolic process		catalytic activity	Pf00933, Pf01915, Pf14310		TRIAE_CS42_6DL_TGACv1_527990_AA1710490			15	0.9	-0.15	0.821431	0.985276	23.55	24.8152	104.5	95.5	6.29	16.23	3	3	98.4	107.8	111.3	98.5	77.2	106.8
High	Master Protein	W5EPP7	Uncharacterized protein [OS=Triticum aestivum]	0	72.834	41	13	149	1	1	764	78.1	6.42	402	531	106.35	122.19	11	11	12	12	metabolic process		catalytic activity	Pf00082, Pf02225, Pf05922		TRIAE_CS42_4DS_TGACv1_361509_AA1169290			0	0.932	-0.1	0.862059	0.986776	10.88	20.8458	103.5	96.5	9.31	8.97	3	3	113.7	94.5	102.5	88.2	105.5	95.5
High	Master Protein	W5F4T8	Uncharacterized protein [OS=Triticum aestivum]	0	72.779	51	14	189	1	1	423	46.8	5.72	316	461	122.99	136.15	13	14	13	13				Pf08442		TRIAE_CS42_5AS_TGACv1_393487_AA1273050			13	0.888	-0.17	0.610547	0.974576	25.22	25.9733	104.2	95.8	20.61	10.11	3	3	100.1	89.3	131.7	92.1	84	102.8
High	Master Protein	A7XDG5	peptidyl-prolyl cis-trans isomerase [OS=Triticum aestivum]	0	72.772	53	9	161	2	1	245	25.9	9.33	447	493	116.09	130.45	9	9	9	9	metabolic process		catalytic activity	Pf00160					0	1.321	0.4	0.115615	0.719093	30.32	26.8486	83.8	116.2	7.44	22.55	3	3	74.5	85.4	76.3	105.1	152.8	105.8
High	Master Protein	A0A1D6AC45	Uncharacterized protein [OS=Triticum aestivum]	0	72.768	29	17	157	1	1	886	97.6	5.67	355	344	114.95	110.13	17	17	14	15			nucleotide binding	Pf00012		TRIAE_CS42_6AL_TGACv1_473373_AA1530600			15	0.901	-0.15	0.82409	0.985276	26.39	24.8153	121.1	78.9	25.3	18.67	3	3	138.7	118.9	82.2	77.3	105.4	77.5
High	Master Protein	A0A1D5WP28	Uncharacterized protein [OS=Triticum aestivum]	0	72.743	64	11	141	2	1	310	33	7.94	410	354	106.31	105.9	10	10	9	10	metabolic process		catalytic activity	Pf00332		TRIAE_CS42_3DL_TGACv1_252640_AA0891210			1	0.877	-0.19	0.889427	0.990309	30.66	21.632	110.8	89.2	47.4	24.71	3	3	176.1	71.3	97.6	108.4	78.6	67.9
High	Master Protein	A0A1D5UWL9	Uncharacterized protein [OS=Triticum aestivum]	0	72.729	66	15	119	3	1	369	40.7	6.54	370	231	109.16	46.85	14	14	9	11	metabolic process		catalytic activity;nucleotide binding	Pf00724		TRIAE_CS42_2DS_TGACv1_177437_AA0577110			3	0.677	-0.56	0.146148	0.78088	13.18	23.3697	123.3	76.7	4.75	19.07	3	3	128.5	118.5	129	79.9	85.6	58.6
High	Master Protein	A0A1D6B8P4	Uncharacterized protein [OS=Triticum aestivum]	0	72.612	58	10	135	10	1	346	36.3	6.65	396	421	97.04	111.14	10	9	10	10	metabolic process		catalytic activity	Pf00348		TRIAE_CS42_6DL_TGACv1_527735_AA1708040			0	1.004	0.01	0.766479	0.98358	32.99	25.2584	97.4	102.6	17.48	7.59	3	3	82.4	98.9	117.2	104.3	91.7	105.5
High	Master Protein	A0A1D5X6Q1	3-phosphoshikimate 1-carboxyvinyltransferase [OS=Triticum aestivum]	0	72.518	52	14	114	3	1	515	54.1	7.28	371	305	104.12	72.28	14	14	12	11	metabolic process		catalytic activity	Pf00275		TRIAE_CS42_4AL_TGACv1_290435_AA0985500			0	0.945	-0.08	0.947661	0.994922	22.04	23.2281	101.6	98.4	17.83	3.88	3	3	99.5	88.8	125	96.3	91.6	98.9
High	Master Protein	A0A1D6AA11	Uncharacterized protein [OS=Triticum aestivum]	0	72.466	45	14	155	1	1	458	51.6	6.48	529	650	121.22	136.9	12	13	11	12	metabolic process	cytoplasm	catalytic activity;nucleotide binding	Pf00587, Pf02403		TRIAE_CS42_6AL_TGACv1_472385_AA1521560			3	1.009	0.01	0.641197	0.9807	25.34	22.5442	101.3	98.7	12.98	2.9	3	3	107.8	104.8	84.2	103.3	97.8	102.1
High	Master Protein	A0A1D5V310	Uncharacterized protein [OS=Triticum aestivum]	0	72.461	49	13	169	2	1	401	41	5.77	825	596	151.14	140.96	12	12	12	12	metabolic process		catalytic activity	Pf00108, Pf02803		TRIAE_CS42_2DS_TGACv1_179516_AA0607730			12	0.85	-0.23	0.597393	0.970428	17.14	25.3112	105.9	94.1	5.03	3.47	3	3	100.4	107.2	110.9	90.1	95.2	96.1
High	Master Protein	A0A1D6B9B7	Uncharacterized protein [OS=Triticum aestivum]	0	72.457	35	17	138	1	1	773	83.1	6.84	221	333	99.76	101.08	16	16	17	16	metabolic process		catalytic activity	Pf00933, Pf01915, Pf14310		TRIAE_CS42_6DL_TGACv1_527990_AA1710490			0
High	Master Protein	W5EMA7	Proteasome subunit alpha type [OS=Triticum aestivum]	0	72.449	60	14	177	2	1	246	27.4	6.8	438	581	127.07	147.77	14	14	13	13	metabolic process;response to stimulus	cytoplasm;cytosol;membrane;nucleus;proteasome	catalytic activity	Pf00227, Pf10584		TRIAE_CS42_4DL_TGACv1_345822_AA1154490; TRIAE_CS42_4BL_TGACv1_320358_AA1036590			0	0.826	-0.28	0.687962	0.983028	30.78	21.5663	106.9	93.1	21.06	12.19	3	3	76.9	107.7	117.6	93.9	113.1	90.7
High	Master Protein	A0A1D5T4Q8	Uncharacterized protein [OS=Triticum aestivum]	0	72.436	53	14	170	3	1	497	56.1	6.2	563	450	141.58	126.57	13	12	13	13	metabolic process		catalytic activity	Pf04107		TRIAE_CS42_1DS_TGACv1_081449_AA0260740			12	0.939	-0.09	0.90066	0.990309	19.53	25.7402	105.9	94.1	6.24	8.07	3	3	97.7	103.9	110.7	104.8	90.6	92.3
High	Master Protein	A0A1D5WAN2	Uncharacterized protein [OS=Triticum aestivum]	0	72.436	29	20	157	5	1	840	92.1	5.47	501	581	110.58	124.59	17	17	17	16				Pf01576, Pf04156, Pf05109, Pf05483, Pf06160, Pf07851, Pf12128, Pf13166		TRIAE_CS42_3B_TGACv1_227221_AA0822270			0	1.078	0.11	0.374978	0.943753	38.86	21.8418	129.8	70.2	10.49	2.14	3	3	124.9	123.9	148.5	67.6	69	66.1
High	Master Protein	A0A1D5U305	superoxide dismutase [OS=Triticum aestivum]	0	72.426	70	13	198	6	1	225	24.6	7.74	511	326	156.13	145.08	12	11	13	12	metabolic process;response to stimulus		antioxidant activity;catalytic activity;metal ion binding	Pf00081, Pf02777		TRIAE_CS42_2BL_TGACv1_131439_AA0427700			7	0.946	-0.08	0.861193	0.986776	22.87	26.8596	104.5	95.5	5.5	11.97	3	3	96.9	103.6	108.2	109.8	94.6	87
High	Master Protein	A0A1D5TWQ5	pyruvate kinase [OS=Triticum aestivum]	0	72.371	42	16	145	14	1	514	55.4	8.06	286	258	124.4	96.49	16	16	12	11	metabolic process		catalytic activity;metal ion binding	Pf00224, Pf02887		TRIAE_CS42_2BL_TGACv1_129802_AA0396620			2	0.806	-0.31	0.372657	0.943753	19.25	25.4671	117.8	82.2	18.39	11.47	3	3	118.2	89.4	129.5	81.2	82.4	99.2
High	Master Protein	A0A1D5ZZD7	Uncharacterized protein [OS=Triticum aestivum]	0	72.354	32	14	167	2	1	724	80.6	5.22	494	480	146.54	131.09	13	12	14	13	metabolic process		catalytic activity	Pf00899, Pf02134, Pf09358		TRIAE_CS42_5DL_TGACv1_437440_AA1466290			0	0.73	-0.45	0.31306	0.93075	8.74	22.3513	106	94	11.98	8.49	3	3	99.7	105.8	125	93.7	94.8	81.1
High	Master Protein	A0A1D6AJ83	glyceraldehyde-3-phosphate dehydrogenase [OS=Triticum aestivum]	0	72.285	52	14	171	2	1	416	43.8	8.05	515	631	107.59	154.34	14	13	14	14	metabolic process		catalytic activity;nucleotide binding	Pf00044, Pf01113, Pf02800		TRIAE_CS42_6AS_TGACv1_487743_AA1572700			0	1.055	0.08	0.561909	0.962	19.52	19.9042	99.5	100.5	9.75	9.92	3	3	85.6	103.8	98.4	99.3	115.9	97
High	Master Protein	W5GJK4	Uncharacterized protein [OS=Triticum aestivum]	0	72.263	33	12	177	1	1	391	42.8	9.67	746	778	141.66	136.8	12	12	12	12	transport	membrane	transporter activity	Pf00153		TRIAE_CS42_6BL_TGACv1_500075_AA1598290			14	1.054	0.08	0.699107	0.983028	23.79	26.5983	96.8	103.2	3.52	10.92	3	3	94.9	96	101.3	113.9	91.5	102.4
High	Master Protein	A0A1D6BYQ7	Uncharacterized protein [OS=Triticum aestivum]	0	72.263	46	15	147	1	1	426	47.6	6.29	281	316	103.45	97.88	13	12	11	9	metabolic process	cytoplasm	catalytic activity;nucleotide binding	Pf00004, Pf00158, Pf05496, Pf06414, Pf07724, Pf07726, Pf07728, Pf13191, Pf13401		TRIAE_CS42_7AS_TGACv1_570644_AA1838750; TRIAE_CS42_7AS_TGACv1_570644_AA1838780; TRIAE_CS42_7BS_TGACv1_592175_AA1932490; TRIAE_CS42_7DS_TGACv1_621706_AA2023850			0	0.423	-1.24	0.0349195	0.411169	14.29	18.5827	140.6	59.4	67.08		2	1	372.9	133				94.2
High	Master Protein	A0A1D5V1U8	Cytochrome b6-f complex iron-sulfur subunit [OS=Triticum aestivum]	0	72.234	89	12	160	12	1	179	19.1	6.16	489	583	122.33	118.8	10	11	11	12	metabolic process;transport	membrane	catalytic activity	Pf00355, Pf08802		TRIAE_CS42_2DS_TGACv1_178873_AA0601950			0	1.51	0.59	0.0230353	0.322899	33.35	27.3377	81.9	118.1	9.56	8.29	3	3	79.8	88.5	73.1	130.9	112.6	115.1
High	Master Protein	S4Z090	Photosystem II CP43 reaction center protein [OS=Triticum aestivum]	0	72.178	42	13	183	13	1	473	52.1	7.21	552	610	146.82	161.14	12	12	13	13	metabolic process	membrane	metal ion binding	Pf00421					0	1.109	0.15	0.511245	0.957414	29.25	26.9514	100.1	99.9	12.2	11.87	3	3	82.3	100.6	104	100.5	94.3	118.2
High	Master Protein	W5CY88	Uncharacterized protein [OS=Triticum aestivum]	0	72.16	85	10	190	2	1	162	17.3	5.31	602	363	171.15	131.44	8	9	7	10	cellular homeostasis;metabolic process;regulation of biological process		antioxidant activity;catalytic activity	Pf00578, Pf08534		TRIAE_CS42_3B_TGACv1_220730_AA0717400			9	0.863	-0.21	0.509421	0.957414	24.22	27.5113	107	93	12.48	1.96	3	3	124.3	98.7	103.6	90.1	90.1	93.2
High	Master Protein	W5E7T1	Uncharacterized protein [OS=Triticum aestivum]	0	72.135	42	14	148	1	1	465	52.5	6.32	547	663	106.37	133.02	12	13	12	12	metabolic process	cytoplasm	catalytic activity;nucleotide binding	Pf00587, Pf02403		TRIAE_CS42_U_TGACv1_643340_AA2130880			14	1.049	0.07	0.586102	0.970069	30.93	24.859	99.3	100.7	6.08	3.51	3	3	98.1	93.2	105.2	98.8	99.4	105.3
High	Master Protein	A0A1D6B2T1	Uncharacterized protein [OS=Triticum aestivum]	0	72.025	45	14	154	1	1	458	51.7	6.48	527	654	117.94	136.5	12	13	11	12	metabolic process	cytoplasm	catalytic activity;nucleotide binding	Pf00587, Pf02403		TRIAE_CS42_6DL_TGACv1_526359_AA1680400			0	0.874	-0.19	0.83884	0.986776	9.31	20.28	106.7	93.3	21.47	4.33	3	3	120.4	110.5	78.2	101.3	96.6	92.9
High	Master Protein	A0A1D6S9I6	Uncharacterized protein [OS=Triticum aestivum]	0	71.982	35	17	134	1	1	774	83.3	6.92	197	322	95.71	100.26	16	16	17	16	metabolic process		catalytic activity	Pf00933, Pf01915, Pf14310		TRIAE_CS42_6BL_TGACv1_500033_AA1597660			0	1.053	0.08	0.565066	0.962	19.82	18.9902	97.4	102.6	5.16	28.44	3	3	108.8	99.1	100.3	105.6	66.4	119.8
High	Master Protein	W5FP48	Uncharacterized protein [OS=Triticum aestivum]	0	71.855	80	13	176	2	1	235	24.7	6.68	737	785	132.51	142.95	13	13	13	13				Pf00314		TRIAE_CS42_5BS_TGACv1_423362_AA1375070			1	0.617	-0.7	0.0914136	0.655238	14.07	22.1978	119.5	80.5	34.11	6.2	3	3	170.9	111.7	89	81.3	75.2	72
High	Master Protein	A0A1D5TIS5	Uncharacterized protein [OS=Triticum aestivum]	0	71.82	65	15	119	5	1	369	40.8	6.47	378	139	107.12	48.15	14	14	10	11	metabolic process		catalytic activity;nucleotide binding	Pf00724		TRIAE_CS42_2AS_TGACv1_112164_AA0332060			9	0.607	-0.72	0.0202586	0.293897	9.52	25.3568	122.2	77.8	12.14	7.51	3	3	140.2	112	117.5	74.8	83.2	72.2
High	Master Protein	A0A1D5YF58	Lysine--tRNA ligase [OS=Triticum aestivum]	0	71.791	36	16	131	2	1	608	68.3	5.76	333	515	106.85	108.73	15	15	13	13	metabolic process	cytoplasm	catalytic activity;nucleotide binding	Pf00152, Pf01336		TRIAE_CS42_5AL_TGACv1_374648_AA1205530			12	0.886	-0.18	0.745398	0.983136	22.26	24.9716	104.4	95.6	15.31	14.15	3	3	106.6	89.5	121.9	97.6	79.3	105.1
High	Master Protein	A0A1D5UCC9	Uncharacterized protein [OS=Triticum aestivum]	0	71.741	64	13	174	2	1	373	40.8	5.71	445	430	134.54	120.38	12	13	12	13	metabolic process		catalytic activity;metal ion binding	Pf03171, Pf14226		TRIAE_CS42_2BS_TGACv1_147141_AA0478560			8	0.805	-0.31	0.395767	0.943753	20.84	25.0996	112.2	87.8	18.62	22.96	3	3	91.9	111.6	133.8	67.5	87.4	107.7
High	Master Protein	A0A1D6AMQ6	Uncharacterized protein [OS=Triticum aestivum]	0	71.698	30	17	154	1	1	886	97.5	5.67	335	344	112.03	110.13	17	16	14	15			nucleotide binding	Pf00012		TRIAE_CS42_6BL_TGACv1_499857_AA1593340			0
High	Master Protein	A0A077RU36	Uncharacterized protein [OS=Triticum aestivum]	0	71.692	44	15	179	1	1	498	52.5	5.67	815	880	144.14	164	14	13	15	15		chromosome;membrane		Pf05368, Pf13460		TRIAE_CS42_3B_TGACv1_220991_AA0726120			0	1.066	0.09	0.467497	0.957414	3.63	22.2475	96.8	103.2	1.18	12.27	3	3	93.8	94.8	92.6	121.3	100	97.5
High	Master Protein	A0A1D6RLW0	Uncharacterized protein [OS=Triticum aestivum]	0	71.58	32	20	120	3	1	789	86.5	8.02	475	270	91.73	65.58	19	19	13	13			protein binding;RNA binding	Pf02847, Pf02854		TRIAE_CS42_2BL_TGACv1_132210_AA0436040			16	0.796	-0.33	0.385918	0.943753	19.89	24.8985	113.3	86.7	17.87	16.43	3	3	134.3	94.9	108.1	76.2	82.8	103.8
High	Master Protein	A0A1D6D5W3	Probable alanine--tRNA ligase, chloroplastic [OS=Triticum aestivum]	0	71.548	31	17	151	3	1	982	106.9	6.27	393	550	98.62	139.39	13	13	16	16	metabolic process	cytoplasm;mitochondrion	catalytic activity;metal ion binding;nucleotide binding;RNA binding	Pf01411, Pf07973		TRIAE_CS42_7DS_TGACv1_625332_AA2064900			0	1.056	0.08	0.507998	0.957414	14.99	20.5932	84.3	115.7	28.51	21.15	3	3	71.2	76.6	117.3	91.9	105.2	137.8
High	Master Protein	W5GE58	aspartate aminotransferase [OS=Triticum aestivum]	0	71.531	53	15	115	6	1	426	47.3	6.99	249	289	76.88	72.66	13	14	11	11	metabolic process		catalytic activity	Pf00155		TRIAE_CS42_6AS_TGACv1_487104_AA1568170			11	0.89	-0.17	0.77751	0.98358	20.34	24.693	103.4	96.6	7.53	1.2	3	3	101.2	101.2	115	95.1	94.6	92.9
High	Master Protein	W5F2Y1	Uncharacterized protein [OS=Triticum aestivum]	0	71.401	55	11	212	7	1	374	39.2	9.03	535	488	189.37	177.09	10	10	11	11				Pf13561		TRIAE_CS42_5AL_TGACv1_375435_AA1221510			0	1.005	0.01	0.75102	0.983136	21.23	25.3566	94.5	105.5	7.68	4.19	3	3	89.5	104	94.2	105.3	107.8	99.3
High	Master Protein	A0A1D5RTS1	Uncharacterized protein [OS=Triticum aestivum]	0	71.362	59	15	141	4	1	398	41.7	7.8	395	584	92.95	125.21	14	14	14	15	metabolic process		catalytic activity	Pf00056, Pf01073, Pf02866		TRIAE_CS42_1AL_TGACv1_001101_AA0024930			13	1.027	0.04	0.8022	0.984397	23.5	26.2093	96.8	103.2	4.4	5.23	3	3	92.9	97.4	101.4	107.4	96.9	103.9
High	Master Protein	W5BL76	Uncharacterized protein [OS=Triticum aestivum]	0	71.296	30	19	138	4	1	922	105.7	6.76	270	337	103.61	95.18	18	19	14	15	metabolic process	cytosol	catalytic activity	Pf00686, Pf02446		TRIAE_CS42_2BS_TGACv1_148740_AA0494910			14	0.978	-0.03	0.846367	0.986776	22.64	24.8796	105.8	94.2	2.02	5.7	3	3	104.6	102.5	106.7	101.6	93.1	91.4
High	Master Protein	A0A1D5YJR0	Eukaryotic translation initiation factor 3 subunit B [OS=Triticum aestivum]	0	71.215	33	15	161	2	1	721	83.2	5.14	481	449	130.1	113.97	15	15	14	14	cell organization and biogenesis;metabolic process;regulation of biological process	cytoplasm	protein binding;RNA binding	Pf00076, Pf08662		TRIAE_CS42_5AL_TGACv1_375654_AA1225190			14	0.917	-0.13	0.862969	0.986776	20.97	25.0576	111.4	88.6	13.95	11.57	3	3	111.2	88.6	116.2	88.5	88.2	107.3
High	Master Protein	A0A1D6RNT0	Uncharacterized protein [OS=Triticum aestivum]	0	71.214	44	16	163	16	1	493	54.6	6.29	378	463	117.42	125	16	16	15	15	metabolic process		catalytic activity	Pf01704		TRIAE_CS42_2DL_TGACv1_158194_AA0511980			0	0.952	-0.07	0.989133	0.999283	21.39	25.1064	99.9	100.1	7.11	3.28	3	3	99.3	95.4	109.4	95	99.6	101.2
High	Master Protein	A0A1D5Z6T2	Uncharacterized protein [OS=Triticum aestivum]	0	71.095	43	16	127	3	1	627	67.2	6.73	219	250	99.16	83.07	14	14	12	12	metabolic process		catalytic activity	Pf00682, Pf08502		TRIAE_CS42_5BL_TGACv1_405763_AA1334940			0	1.121	0.17	0.253455	0.889427	29.95	21.5552	88.6	111.4	27.67	10.03	3	3	80.8	76.2	123.1	101.6	99.4	118.9
High	Master Protein	A0A024FRN8	Protein disulfide isomerase family protein 5-1 [OS=Triticum aestivum]	0	71.008	55	16	145	5	1	440	47.2	5.4	331	482	90.21	118.81	16	15	16	15	cellular homeostasis;regulation of biological process		catalytic activity	Pf00085, Pf13098, Pf13848, Pf13905					11	1.03	0.04	0.671731	0.983028	37.56	25.224	100.2	99.8	12.37	15.11	3	3	112.9	100.3	88	99.9	114.5	84.4
High	Master Protein	A0A1D5XE54	Uncharacterized protein [OS=Triticum aestivum]	0	70.857	44	14	156	1	1	476	53.9	6.32	557	647	113.87	138.55	12	13	12	12	metabolic process	cytoplasm	catalytic activity;nucleotide binding	Pf00587, Pf02403, Pf12329		TRIAE_CS42_4AS_TGACv1_308167_AA1026480			0	1.055	0.08	0.562548	0.962	61.6	19.9494	97.3	102.7	54.84	28.39	3	3	97.4	174.7	56.4	61	102.8	107.7
High	Master Protein	A0A1D5WD92	Uncharacterized protein [OS=Triticum aestivum]	0	70.779	61	14	143	2	1	415	43.7	8.09	401	586	98.56	113.7	13	13	13	14	metabolic process		catalytic activity	Pf00056, Pf01073, Pf02866		TRIAE_CS42_3DL_TGACv1_249199_AA0841000			1	1.064	0.09	0.406852	0.943753	28.12	21.1864	103.6	96.4	15.09	31.65	3	3	79.6	107.9	97.8	80.8	91.1	142.8
High	Master Protein	A0A1D5RV14	V-type proton ATPase subunit C [OS=Triticum aestivum]	0	70.713	50	12	161	12	1	380	42.8	5.8	428	324	126.5	114.39	12	12	11	11	transport		transporter activity	Pf03223		TRIAE_CS42_1AL_TGACv1_001462_AA0030900			0	1.005	0.01	0.8797	0.990309	20.24	25.8423	99.1	100.9	8.55	1.17	3	3	91.9	98.1	108.7	101.8	99.7	99.8
High	Master Protein	A0A1D5XEW1	Proteasome subunit alpha type [OS=Triticum aestivum]	0	70.707	60	14	172	2	1	246	27.4	6.8	435	595	124.53	136.64	14	13	13	13	metabolic process	cytoplasm;nucleus;proteasome	catalytic activity	Pf00227, Pf10584		TRIAE_CS42_4AS_TGACv1_309048_AA1030210			11	0.947	-0.08	0.862656	0.986776	19.7	26.0776	106.1	93.9	7.45	6.82	3	3	105.8	95.3	110.3	103.7	91.3	93.6
High	Master Protein	G8D5C5	Ribulose bisphosphate carboxylase large chain [OS=Triticum aestivum]	0	70.667	62	13	1213	2	1	202	22.4	6.05	3588	3465	1005.97	1024.04	11	11	13	13	metabolic process		catalytic activity;metal ion binding	Pf00016, Pf02788					0	0.955	-0.07	0.896429	0.990309	23.8	27.5785	99.9	100.1	6.16	12.19	3	3	106.7	94.4	99.2	99.4	87.9	112.3
High	Master Protein	A0A1D5XNG4	adenylosuccinate lyase [OS=Triticum aestivum]	0	70.645	39	15	154	3	1	604	66.8	6.8	219	311	107.09	136.02	14	14	13	13	metabolic process		catalytic activity	Pf00206, Pf08328		TRIAE_CS42_4BL_TGACv1_322558_AA1072060			10	0.89	-0.17	0.809149	0.985276	21.97	24.5305	101.8	98.2	12.54	2.51	3	3	99.7	117.2	92	95.1	99.7	96.2
High	Master Protein	A0A1D5V2G6	40S ribosomal protein SA [OS=Triticum aestivum]	0	70.641	39	11	185	3	1	304	32.9	4.96	631	667	135.05	128.57	10	10	11	10	cell organization and biogenesis;metabolic process	cytoplasm;ribosome	structural molecule activity	Pf00318		TRIAE_CS42_2DS_TGACv1_179131_AA0604550			0	0.9	-0.15	0.773369	0.98358	13.92	25.4469	105.8	94.2	8.85	6.63	3	3	103.9	94.8	113.1	92.3	103.4	92.5
High	Master Protein	A0A1D5SD43	Uncharacterized protein [OS=Triticum aestivum]	0	70.634	31	13	158	1	1	725	79.8	9.07	389	488	130.02	136.71	13	12	13	13	metabolic process		catalytic activity	Pf01077, Pf03460		TRIAE_CS42_1BL_TGACv1_031850_AA0121710			0	0.759	-0.4	0.794488	0.984397	22.34	17.8674	113.7	86.3		35.75	1	2	233.5			136.9	229.6
High	Master Protein	A0A1D5STE0	Uncharacterized protein [OS=Triticum aestivum]	0	70.61	27	16	154	16	1	1043	115.1	5.91	362	378	123.37	118.45	14	15	15	15	metabolic process		catalytic activity	Pf01055, Pf13802		TRIAE_CS42_1DL_TGACv1_061737_AA0202710			0	0.877	-0.19	0.71379	0.983028	13.45	24.0205	110.3	89.7	10.22	10.77	3	3	107.6	95.6	117.4	87.5	104.7	87.2
High	Master Protein	A0A1D5XG45	Purple acid phosphatase [OS=Triticum aestivum]	0	70.603	39	17	180	5	1	617	69.1	6.38	389	255	109.44	104.31	17	17	15	16	metabolic process		catalytic activity;metal ion binding	Pf00149, Pf14008		TRIAE_CS42_4BL_TGACv1_320374_AA1037110			12	0.808	-0.31	0.31651	0.930938	18.51	25.8923	114.2	85.8	8.68	13.24	3	3	115.4	117.4	99.8	101.9	86.8	78.6
High	Master Protein	W5BMW7	Uncharacterized protein [OS=Triticum aestivum]	0	70.601	51	10	180	2	1	226	24.5	4.67	394	622	136.57	144.3	10	10	10	10	metabolic process		RNA binding	Pf00736		TRIAE_CS42_2BS_TGACv1_147294_AA0481310			11	0.957	-0.06	0.907265	0.990309	24.76	27.8426	106.6	93.4	11.84	1.89	3	3	111.2	110.2	89.5	96.7	98	94.4
High	Master Protein	A0A1D5TIV5	malic enzyme [OS=Triticum aestivum]	0	70.578	46	18	123	18	1	623	69.2	5.99	348	146	108.24	56.84	16	17	12	11	metabolic process		catalytic activity;metal ion binding;nucleotide binding	Pf00390, Pf03949		TRIAE_CS42_2AS_TGACv1_112185_AA0332560			0	0.828	-0.27	0.551955	0.960787	17.41	23.945	102.3	97.7	7.9	10.48	3	3	115.5	100.6	101.3	96.7	83.3	102.5
High	Master Protein	A0A1D5UV98	pyruvate kinase [OS=Triticum aestivum]	0	70.568	33	15	165	5	1	570	62	5.86	496	568	112.84	116.63	14	14	14	14	metabolic process		catalytic activity;metal ion binding	Pf00224, Pf02887		TRIAE_CS42_2DS_TGACv1_177244_AA0570280			10	0.92	-0.12	0.850795	0.986776	19.69	25.4979	104.3	95.7	12.63	6.82	3	3	91.4	101.8	117.3	93.4	92	104.1
High	Master Protein	A0A1D5SFK2	glycosyltransferase [OS=Triticum aestivum]	0	70.431	36	12	168	2	1	451	48.3	6.4	493	290	145.51	123.25	12	12	10	11	metabolic process		catalytic activity	Pf00201		TRIAE_CS42_1BL_TGACv1_032609_AA0132000			1	0.801	-0.32	0.552008	0.960787	22.17	22.9159	110.7	89.3	9.1	22.67	3	3	114.7	98.1	116.1	92.5	68.9	109.7
High	Master Protein	A0A1D5XZ43	Beta-galactosidase [OS=Triticum aestivum]	0	70.412	43	18	117	3	1	853	92.1	6.39	266	231	95.3	92.33	14	16	16	15	metabolic process		catalytic activity	Pf01301, Pf02140, Pf02449		TRIAE_CS42_4DL_TGACv1_343087_AA1129250			15	0.992	-0.01	0.769675	0.98358	21.94	24.5306	102.3	97.7	4.9	3.09	3	3	97	107	103.1	100.1	98.5	94.2
High	Master Protein	A0A1D5XWD8	Uncharacterized protein [OS=Triticum aestivum]	0	70.373	25	17	133	2	1	1078	122.7	4.92	317	240	122.89	86.21	17	17	12	12	metabolic process		catalytic activity;metal ion binding	Pf00675, Pf05193		TRIAE_CS42_4DL_TGACv1_342529_AA1115980			13	0.961	-0.06	0.863522	0.986776	35.52	23.0525	102.6	97.4	15.06	7.38	3	3	101.8	85	115.2	93.7	96.7	107.6
High	Master Protein	A0A1D5Z6K5	Uncharacterized protein [OS=Triticum aestivum]	0	70.29	40	11	1034	1	1	295	32	4.61	2318	2777	929.39	1031.88	10	9	10	9			RNA binding	Pf00076, Pf13893, Pf14259		TRIAE_CS42_5BL_TGACv1_405733_AA1334090			10	1.126	0.17	0.460835	0.957414	25.58	29.8339	96.8	103.2	16.55	9.81	3	3	96.7	110.6	79.1	103.1	115.4	95.1
High	Master Protein	A1YE31	Ribosomal protein L3-A3 [OS=Triticum aestivum]	0	70.264	37	16	182	7	1	389	44.6	9.95	454	463	122.53	103.13	15	15	14	15	metabolic process	ribosome	structural molecule activity	Pf00297		TRIAE_CS42_5AS_TGACv1_392798_AA1264810			0	1.017	0.02	0.683461	0.983028	31.82	24.5274	104.8	95.2	1.57	6.69	3	3	101.4	103.3	104.7	93.7	92.5	104.3
High	Master Protein	A0A1D6RW73	Uncharacterized protein [OS=Triticum aestivum]	0	70.243	26	17	123	2	1	1035	117.8	4.91	257	183	114.1	73.89	17	17	11	11	metabolic process		catalytic activity;metal ion binding	Pf00675, Pf05193		TRIAE_CS42_4AS_TGACv1_306711_AA1012310			0
High	Master Protein	A0A1D6A242	protoporphyrinogen oxidase [OS=Triticum aestivum]	0	70.184	51	17	154	1	1	531	56.3	9.14	560	540	115.11	128.97	14	14	16	16	metabolic process		catalytic activity	Pf01593, Pf13450		TRIAE_CS42_5DS_TGACv1_457092_AA1482170			0	1.35	0.43	0.0830717	0.622741	13.77	20.9301	86.7	113.3	17.81	12.81	3	3	94.7	91.5	67.2	127.9	119.6	99.1
High	Master Protein	W5FES4	Uncharacterized protein [OS=Triticum aestivum]	0	70.128	50	12	145	5	1	475	50.9	4.48	588	429	134.85	91.76	11	12	9	9		nucleus	DNA binding	Pf01429		TRIAE_CS42_5BL_TGACv1_407315_AA1355720			0	0.487	-1.04	0.00625079	0.12753	17.68	22.7638	140.4	59.6	50.12	50.16	3	3	225.8	111.5	93	34	47.3	88.4
High	Master Protein	A0A1D5TQ60	Uncharacterized protein [OS=Triticum aestivum]	0	70.085	47	12	217	12	1	214	22.9	9.61	393	325	108.69	142.3	11	10	12	12	metabolic process		metal ion binding	Pf05757		TRIAE_CS42_2AS_TGACv1_113985_AA0363060			0	1.441	0.53	0.0425938	0.471984	33.83	29.1592	85.1	114.9	6.89	9.37	3	3	89.4	77.9	84.9	127.4	114.6	105.8
High	Master Protein	A0A1D6RW70	Uncharacterized protein [OS=Triticum aestivum]	0	70.026	29	12	131	3	1	530	58.5	6.32	173	253	91.27	86.35	11	11	11	10	metabolic process		catalytic activity;metal ion binding	Pf00675, Pf05193		TRIAE_CS42_4AS_TGACv1_306710_AA1012280			9	0.996	-0.01	0.770944	0.98358	31.72	24.7894	102.8	97.2	5.56	8.88	3	3	100.5	95.6	106.8	95	93	109.1
High	Master Protein	W5B491	Uncharacterized protein [OS=Triticum aestivum]	0	69.933	51	12	128	2	1	357	38.8	6.3	345	311	94.5	62.12	12	11	10	10	metabolic process		catalytic activity;protein binding	Pf00891, Pf08100, Pf12847		TRIAE_CS42_2AS_TGACv1_113978_AA0363000			1	0.449	-1.16	0.00373452	0.0861577	5.35	20.1574	140	60	26.88	39.66	3	3	174.6	134.4	101.2	41.5	57.5	90.7
High	Master Protein	A0A1D5TKV5	Uncharacterized protein [OS=Triticum aestivum]	0	69.893	52	16	177	4	1	477	52.2	8.38	355	425	114.26	147.66	13	14	16	16	metabolic process		catalytic activity	Pf01747, Pf14306		TRIAE_CS42_2AS_TGACv1_112612_AA0342300			10	1.31	0.39	0.103519	0.690833	29.7	25.2876	88.5	111.5	5.22	5.78	3	3	81.6	89.6	89.2	120.2	107.2	112.3
High	Master Protein	A0A1D6CD94	Uncharacterized protein [OS=Triticum aestivum]	0	69.817	73	10	127	4	1	240	26	6.62	411	315	127.77	109.42	10	8	7	7			catalytic activity	Pf00657		TRIAE_CS42_7BL_TGACv1_583922_AA1919080			1	0.636	-0.65	0.0509928	0.513872	18.7	24.4512	122.6	77.4	8.22	8.65	3	3	117.2	120	136.1	68.9	82	75.8
High	Master Protein	W5H3N4	Proteasome subunit alpha type [OS=Triticum aestivum]	0	69.806	52	11	165	4	1	288	31.3	5.43	684	567	143.5	138.32	11	11	11	11	metabolic process	cytoplasm;nucleus;proteasome	catalytic activity	Pf00227, Pf10584		TRIAE_CS42_6DS_TGACv1_544067_AA1746280			8	0.91	-0.14	0.70417	0.983028	13.36	25.9665	103.1	96.9	3.76	3.29	3	3	102.4	100.9	108.3	96.3	92.9	99.3
High	Master Protein	A0A096ULU9	Uncharacterized protein [OS=Triticum aestivum]	0	69.658	50	9	168	1	1	226	24.5	4.63	403	654	129.62	137.95	9	9	9	9	metabolic process		RNA binding	Pf00736		TRIAE_CS42_2AS_TGACv1_115097_AA0370990			0	0.9	-0.15	0.849299	0.986776	10.66	24.4592	105.3	94.7	10.6	4.92	3	3	93.9	116	104	100.7	93.5	91.9
High	Master Protein	A0A1D6C4M4	Uncharacterized protein [OS=Triticum aestivum]	0	69.442	43	11	209	6	1	284	30.9	9.58	665	705	171.4	180.56	11	10	11	11	metabolic process	ribosome	RNA binding;structural molecule activity	Pf00189, Pf07650		TRIAE_CS42_7BL_TGACv1_577288_AA1871360			6	0.929	-0.11	0.783175	0.98358	21.09	27.3045	103	97	15.29	9.59	3	3	98.2	94.8	124.4	86.2	92.5	104
High	Master Protein	A0A1D5SZB5	Uncharacterized protein [OS=Triticum aestivum]	0	69.332	44	14	156	1	1	459	49.5	7.49	596	716	120.32	131.93	12	12	14	14						TRIAE_CS42_1DL_TGACv1_063547_AA0228520			1	1.248	0.32	0.11274	0.716043	18.97	21.3735	85	115	7.47	13.44	3	3	81.8	82.5	93.2	130.6	111.7	100.2
High	Master Protein	W5EPW2	Uncharacterized protein [OS=Triticum aestivum]	0	69.32	43	10	161	10	1	343	37.4	6.68	464	410	118.63	113.69	10	10	10	10	metabolic process;regulation of biological process		catalytic activity	Pf00112, Pf08127		TRIAE_CS42_4DS_TGACv1_362292_AA1178580			0	0.86	-0.22	0.579977	0.967746	22.24	25.4943	105.9	94.1	3.31	10.29	3	3	106.6	105.4	112.1	99.7	94.8	81.4
High	Master Protein	A0A1D5X9H1	Uncharacterized protein [OS=Triticum aestivum]	0	69.276	43	14	141	2	1	767	78.4	6.07	311	433	82.29	120.52	11	10	14	14	metabolic process		catalytic activity	Pf00082, Pf02225, Pf05922		TRIAE_CS42_4AL_TGACv1_292749_AA0999630			1	0.9	-0.15	0.997246	0.99955	14.6	21.2142	105.8	94.2	17.35	15.13	3	3	90.8	125.3	98	87.3	111.9	86.6
High	Master Protein	A0A1D5YB80	Uncharacterized protein [OS=Triticum aestivum]	0	69.224	24	11	168	6	1	684	72.7	6.05	403	657	126.34	155.94	8	8	11	9	metabolic process		nucleotide binding;protein binding	Pf00012, Pf06723		TRIAE_CS42_5AL_TGACv1_373996_AA1187060			0	0.921	-0.12	0.995295	0.999395	37.46	20.2176	95.6	104.4	10.32	29.91	3	3	99.4	82.8	99.7	73.1	136.4	108.5
High	Master Protein	W5FWT6	aldehyde dehydrogenase 7B1 [OS=Triticum aestivum]	0	69.168	45	14	169	1	1	509	54.3	6.44	353	365	130.11	125.77	13	13	13	12	metabolic process		catalytic activity	Pf00171		TRIAE_CS42_5DL_TGACv1_434571_AA1438180			0	0.56	-0.84	0.0469202	0.492796	4.71	20.0153	128.2	71.8	14.97	5.97	3	3	124.4	150.3	112.6	67.5	75.6	69.6
High	Master Protein	A0A1D6C689	Uncharacterized protein [OS=Triticum aestivum]	0	69.118	41	9	156	2	1	412	43.8	7.58	520	315	145.22	107.55	9	8	7	7		membrane	catalytic activity			TRIAE_CS42_7BL_TGACv1_577628_AA1879860			0	0.534	-0.91	0.0172883	0.262858	6.22	23.0389	125.3	74.7	13.48	27.53	3	3	144.8	115.8	115.3	57.5	97.5	69.1
High	Master Protein	A0A1D5YNX6	Succinate dehydrogenase [ubiquinone] flavoprotein subunit, mitochondrial [OS=Triticum aestivum]	0	68.984	32	13	143	13	1	621	68.3	6.57	516	553	101.64	111.7	12	11	12	12	metabolic process;transport	membrane	catalytic activity;nucleotide binding	Pf00890, Pf02910		TRIAE_CS42_5AL_TGACv1_377012_AA1243200			0	1.065	0.09	0.558711	0.962	27.16	25.6317	100.8	99.2	5.31	8.78	3	3	95.3	106	101.9	106.9	100.2	89.7
High	Master Protein	D3JUT3	xylanase inhibitor protein I [OS=Triticum aestivum]	0	68.964	44	14	143	14	1	304	33.3	8.47	435	292	116.56	94.66	14	14	11	11	metabolic process		catalytic activity	Pf00704					0	0.658	-0.6	0.0373554	0.428427	14.22	26.1491	126.2	73.8	22.44	4.4	3	3	146.1	92.3	129.3	81.4	75.4	75.6
High	Master Protein	A0A1D6BU59	3-phosphoshikimate 1-carboxyvinyltransferase [OS=Triticum aestivum]	0	68.893	58	15	125	4	1	510	53.8	6.8	341	368	102.32	90.17	15	15	14	14	metabolic process		catalytic activity	Pf00275		TRIAE_CS42_7AS_TGACv1_569503_AA1817660			12	0.89	-0.17	0.791558	0.984163	20.82	24.5958	105.1	94.9	7.06	11.92	3	3	116.1	101.1	106.5	79.7	96.3	100.4
High	Master Protein	A0A1D5UY12	Uncharacterized protein [OS=Triticum aestivum]	0	68.843	45	12	163	2	1	357	38.7	6.28	446	316	112.54	75.1	12	12	11	11	metabolic process		catalytic activity;protein binding	Pf00891, Pf08100, Pf12847		TRIAE_CS42_2DS_TGACv1_177741_AA0583580			0	0.516	-0.95	0.0310696	0.388707	7.82	19.4479	123.6	76.4	27.33	19.44	3	3	120.9	102.5	172	52.9	74.7	76.9
High	Master Protein	A0A1D6CE84	ribosomal protein [OS=Triticum aestivum]	0	68.814	38	9	148	3	1	227	25.6	9.66	350	344	111.63	110.3	9	9	9	9	metabolic process	ribosome	RNA binding;structural molecule activity	Pf00687		TRIAE_CS42_7BS_TGACv1_591936_AA1926010			7	0.843	-0.25	0.432938	0.946765	26.07	26.4104	112	88	14.2	13.6	3	3	109.6	95.2	126.5	79.5	86.1	103.1
High	Master Protein	A0A1D6S926	Uncharacterized protein [OS=Triticum aestivum]	0	68.796	57	14	152	14	1	361	38.2	6.39	540	558	132.01	114.88	13	13	13	13			RNA binding	Pf00013, Pf13014		TRIAE_CS42_6BL_TGACv1_499463_AA1583400			0	0.872	-0.2	0.713148	0.983028	21.7	24.7418	112.4	87.6	12.71	6.65	3	3	128.8	100.5	110	81.8	85.8	93.2
High	Master Protein	A0A1D5YHW3	Uncharacterized protein [OS=Triticum aestivum]	0	68.743	59	14	155	14	1	429	46.2	6.33	316	337	102.6	113.39	14	14	14	13	metabolic process		catalytic activity	Pf00201, Pf03033, Pf13579		TRIAE_CS42_5AL_TGACv1_375188_AA1217460			0	0.992	-0.01	0.782419	0.98358	43.44	24.7642	94	106	29.72	14.04	3	3	80.6	83.1	132.7	93.8	92.2	117.6
High	Master Protein	A0A1D5WAA4	Uncharacterized protein [OS=Triticum aestivum]	0	68.707	32	15	149	3	1	508	55.2	6.54	275	327	92.1	96.94	14	13	13	13	metabolic process			Pf00330, Pf00694		TRIAE_CS42_3B_TGACv1_226947_AA0820310			0	0.989	-0.02	0.688581	0.983028	33.38	22.323	99.4	100.6	3.98	5.31	3	3	104.8	96.7	100.9	102.3	102.1	93.1
High	Master Protein	A0A0F6QT98	aldehyde dehydrogenase 7B1 [OS=Triticum aestivum]	0	68.697	45	14	166	1	1	509	54.4	6.54	335	349	129.5	120.93	13	13	13	12	metabolic process		catalytic activity	Pf00171					14	0.768	-0.38	0.300889	0.922441	20.1	25.2841	107	93	13.81	4.74	3	3	108.3	88.3	116.2	94.2	92.1	100.8
High	Master Protein	A0A1D6AWD6	Uncharacterized protein [OS=Triticum aestivum]	0	68.506	55	11	161	3	1	312	34.5	6.52	462	465	125.71	125.09	11	10	11	10	metabolic process		catalytic activity	Pf00248		TRIAE_CS42_6BS_TGACv1_513467_AA1642470			8	0.899	-0.15	0.738898	0.983028	23.35	25.5948	103.8	96.2	18.89	7.52	3	3	85.8	100.4	124.6	104.7	91.5	93
High	Master Protein	A0A1D6CX47	Uncharacterized protein [OS=Triticum aestivum]	0	68.454	26	17	136	8	1	1082	120.1	5.64	252	336	89.37	116.73	15	13	16	15	metabolic process	cytoplasm	catalytic activity;nucleotide binding	Pf02091, Pf02092, Pf05746		TRIAE_CS42_7DS_TGACv1_621608_AA2020800			7	1.001	0	0.754727	0.98333	26.59	24.0848	98.9	101.1	14.33	8.55	3	3	87.3	98.1	115.8	90.7	100.3	107.7
High	Master Protein	A0A1D6CHE3	peptidylprolyl isomerase [OS=Triticum aestivum]	0	68.431	34	15	176	1	1	559	62	5.45	381	406	133.64	111.37	14	14	12	14	metabolic process		catalytic activity;protein binding	Pf00254, Pf00515, Pf07719, Pf12895, Pf13181, Pf13414, Pf13424, Pf13432, Pf14559		TRIAE_CS42_7BS_TGACv1_592696_AA1943250			0
High	Master Protein	W5FYI0	Chlorophyll a-b binding protein, chloroplastic [OS=Triticum aestivum]	0	68.298	74	11	163	1	1	245	26.7	6.11	346	350	126.34	134.31	10	10	11	10	metabolic process;response to stimulus	membrane	protein binding	Pf00504		TRIAE_CS42_5DL_TGACv1_432989_AA1397000			0	0.832	-0.26	0.75094	0.983136	26.41	20.7352	110.5	89.5	21.51	27.44	3	3	81.5	113.5	126.2	67.9	92	118.8
High	Master Protein	W5FIZ2	Chlorophyll a-b binding protein, chloroplastic [OS=Triticum aestivum]	0	68.29	74	11	164	1	1	245	26.7	6.11	364	389	128.08	130.5	10	10	11	10	metabolic process;response to stimulus	membrane	protein binding	Pf00504		TRIAE_CS42_5AL_TGACv1_374690_AA1206680; TRIAE_CS42_5BL_TGACv1_404484_AA1301600			13	1.041	0.06	0.638515	0.9807	39.02	25.2701	97.6	102.4	21.46	19.65	3	3	81.7	92.4	122.6	83.6	97	122.7
High	Master Protein	A0A1D5ZPS6	Uncharacterized protein [OS=Triticum aestivum]	0	68.269	58	14	155	4	1	410	43.1	5.66	435	425	120.69	99.53	14	14	13	14	metabolic process		catalytic activity	Pf00890, Pf01134, Pf01266, Pf03486, Pf07992, Pf12831, Pf13450		TRIAE_CS42_5DL_TGACv1_433864_AA1424080			11	0.884	-0.18	0.592942	0.970428	13.86	25.9217	105	95	6.41	6.39	3	3	101.1	105.4	114.5	97.5	95.2	86.3
High	Master Protein	W5EDY1	Uncharacterized protein [OS=Triticum aestivum]	0	68.226	45	14	163	1	1	507	56.5	8.91	423	245	132.77	105.47	14	14	13	13	metabolic process		catalytic activity;protein binding	Pf00232		TRIAE_CS42_4BS_TGACv1_327950_AA1079560			1	0.664	-0.59	0.15798	0.792321	12.26	21.1591	110.5	89.5	20.83	11.71	3	3	103.7	104.2	146.6	71.2	84.5	89.9
High	Master Protein	A0A1D5UQX7	Uncharacterized protein [OS=Triticum aestivum]	0	68.21	14	15	127	5	1	1436	157.3	5.34	431	409	96.48	116.54	12	12	13	13	metabolic process		catalytic activity	Pf00586, Pf02769, Pf13507		TRIAE_CS42_2DL_TGACv1_160221_AA0548340			0	1.05	0.07	0.479461	0.957414	24.21	21.9398	97.1	102.9	8.51	23	3	3	94.8	98.3	111.2	117.9	73.6	104.1
High	Master Protein	A0A1D6CEJ1	Uncharacterized protein [OS=Triticum aestivum]	0	68.16	49	13	186	1	1	321	35.3	8.15	554	494	146.1	151.72	11	11	13	13			protein binding	Pf02798, Pf13409, Pf13410, Pf13417, Pf14497		TRIAE_CS42_7BS_TGACv1_591997_AA1927740			0	1.379	0.46	0.0989563	0.676903	30.05	20.3339	84.1	115.9	24.67	6.5	3	3	64.7	83.8	106.5	122.2	115.6	107.3
High	Master Protein	A0A1D5VHJ6	Uncharacterized protein [OS=Triticum aestivum]	0	68.16	52	10	181	10	1	200	22.3	9.8	653	622	116.95	127.16	10	10	9	9	metabolic process	ribosome	RNA binding;structural molecule activity	Pf00177		TRIAE_CS42_3AS_TGACv1_210886_AA0680840			0	1.016	0.02	0.845142	0.986776	39.73	27.4708	109.3	90.7	5.34	13.84	3	3	116.2	106	106.2	79.3	88.2	104.1
High	Master Protein	A0A1D6ARM0	Uncharacterized protein [OS=Triticum aestivum]	0	68.053	26	16	129	16	1	776	86.9	5.16	169	189	85.08	85.26	14	14	14	14			catalytic activity	Pf00293		TRIAE_CS42_6BL_TGACv1_501132_AA1613950			0	0.895	-0.16	0.780569	0.98358	15.27	25.2652	109.8	90.2	1.29	13.49	3	3	110.2	108	107.5	104.9	80.7	88.7
High	Master Protein	A0A1D5XWW9	Uncharacterized protein [OS=Triticum aestivum]	0	68.042	46	14	190	1	1	398	43.1	4.75	361	423	137.1	115.87	14	14	13	14				Pf00575		TRIAE_CS42_4DL_TGACv1_342632_AA1118630			15	1.136	0.18	0.435647	0.947919	21.86	27.5898	92.8	107.2	4.14	1.15	3	3	92.7	97.1	89.5	105.5	107.2	108
High	Master Protein	A0A1D6SCC4	3-oxoacyl-[acyl-carrier-protein] synthase [OS=Triticum aestivum]	0	67.978	45	12	129	3	1	459	48.4	7.4	344	313	88.72	110.2	10	10	11	10	metabolic process		catalytic activity	Pf00109, Pf02801		TRIAE_CS42_7AS_TGACv1_569074_AA1806510			0	0.893	-0.16	0.968427	0.996939	26	21.5028	97.4	102.6	6.1	2.79	3	3	104.2	92.4	96.7	105.3	101.8	99.6
High	Master Protein	W5BBK0	Uncharacterized protein [OS=Triticum aestivum]	0	67.968	49	15	154	4	1	426	47.6	5.86	395	237	120	84.35	15	15	14	14			protein binding	Pf01399		TRIAE_CS42_2BL_TGACv1_129302_AA0377400			11	0.751	-0.41	0.266263	0.904469	18.93	24.7564	120.1	79.9	19.16	14.85	3	3	117	92	135.9	77.7	77.8	99.6
High	Master Protein	W5A160	Uncharacterized protein [OS=Triticum aestivum]	0	67.966	56	15	141	1	1	372	42.1	6.9	335	426	97.33	123.84	11	11	15	15	metabolic process	cytoplasm	catalytic activity;nucleotide binding	Pf00587, Pf03129, Pf09180		TRIAE_CS42_1BL_TGACv1_032508_AA0130700			0
High	Master Protein	A0A1D6CST6	Phosphoglycerate kinase [OS=Triticum aestivum]	0	67.94	32	10	303	2	1	401	42.1	6.46	731	900	215.78	247.14	10	10	10	10	metabolic process		catalytic activity;nucleotide binding	Pf00162		TRIAE_CS42_7DL_TGACv1_604379_AA1997540			0	0.622	-0.69	0.355327	0.942528	20.68	18.4724	123.3	76.7	52.22	9.79	3	2	218.1	69.6	139	92.6		80.6
High	Master Protein	A0A1D6D033	Uncharacterized protein [OS=Triticum aestivum]	0	67.94	62	20	119	20	1	397	44	8.25	190	342	59.42	98.87	15	16	18	17	metabolic process		catalytic activity;metal ion binding	Pf00174, Pf03404		TRIAE_CS42_7DS_TGACv1_622272_AA2036850			0	1	0	0.779587	0.98358	20.21	25.0594	99.1	100.9	5.97	12.85	3	3	95.4	94.4	105	116.5	91.6	97.2
High	Master Protein	A0A1D5YGF5	Uncharacterized protein [OS=Triticum aestivum]	0	67.896	40	16	132	2	1	710	75.5	8.27	481	357	108.47	92.19	14	15	12	12			catalytic activity;nucleotide binding	Pf01268		TRIAE_CS42_5AL_TGACv1_374876_AA1210830			0	0.87	-0.2	0.85532	0.986776	22.65	22.2204	105.5	94.5	50.03	30.35	3	3	114.4	146.3	46.1	66	124.7	102.5
High	Master Protein	A0A1D6D8Q1	Uncharacterized protein [OS=Triticum aestivum]	0	67.867	27	16	116	16	1	888	96.6	6	423	479	87.57	101.48	12	12	15	14	metabolic process		catalytic activity;RNA binding	Pf00013, Pf00575, Pf01138, Pf03725, Pf03726		TRIAE_CS42_U_TGACv1_640986_AA2081500			0	1.037	0.05	0.758602	0.98358	29.41	25.8525	100.2	99.8	4.84	3.11	3	3	95.6	99.1	105.2	97.9	98.6	103.6
High	Master Protein	W5E6V3	Uncharacterized protein [OS=Triticum aestivum]	0	67.863	46	14	197	1	1	398	43.1	4.77	369	425	142.42	123.97	14	14	13	14	response to stimulus	membrane	RNA binding	Pf00575		TRIAE_CS42_4BL_TGACv1_320562_AA1043400			0	1.156	0.21	0.365129	0.943753	40.42	19.7622	108.3	91.7	47.36	41.83	3	3	123.7	124.7	44.2	58.5	144.1	104.8
High	Master Protein	A0A1D6AYA3	Acetyltransferase component of pyruvate dehydrogenase complex [OS=Triticum aestivum]	0	67.832	39	16	163	2	1	553	59.5	8.4	447	446	108.63	125.75	14	14	14	15	metabolic process	organelle lumen	catalytic activity	Pf00198, Pf00364, Pf02817		TRIAE_CS42_6BS_TGACv1_514091_AA1654910			12	1.009	0.01	0.749895	0.983136	22.03	25.2489	100.9	99.1	7.14	7.86	3	3	109	99.4	94.8	107.2	97.7	91.8
High	Master Protein	A0A1D5VT73	fructose-bisphosphate aldolase [OS=Triticum aestivum]	0	67.736	49	13	161	12	1	419	45.1	8.85	729	533	143.31	126.58	13	13	11	12	metabolic process		catalytic activity	Pf00274		TRIAE_CS42_3B_TGACv1_221301_AA0736640			0	0.826	-0.28	0.374424	0.943753	12.82	26.0081	107.9	92.1	5.8	0.86	3	3	103.4	106.6	115.5	91	91	92.4
High	Master Protein	A0A1D6RI07	Uncharacterized protein [OS=Triticum aestivum]	0	67.732	33	20	112	3	1	790	86.5	7.65	360	202	80.38	59.28	19	19	14	14			protein binding;RNA binding	Pf02847, Pf02854		TRIAE_CS42_2AL_TGACv1_093031_AA0269830			0	0.834	-0.26	0.75583	0.98358	15.68	20.5789	112.2	87.8	24.3	15.81	3	3	106.1	86.6	139.8	83.1	79.2	105.3
High	Master Protein	W5A7X5	Uncharacterized protein [OS=Triticum aestivum]	0	67.648	36	17	143	17	1	663	73.7	7.37	407	408	110.79	108.35	15	15	14	13	metabolic process	cytoplasm	catalytic activity;nucleotide binding	Pf00750, Pf03485, Pf05746		TRIAE_CS42_1BS_TGACv1_050237_AA0169410			0	0.824	-0.28	0.507398	0.957414	18.05	24.6985	116.8	83.2	12.58	12.1	3	3	119.3	96.1	121.7	84.9	78.6	99.3
High	Master Protein	A0A1D6BGQ2	Acetyltransferase component of pyruvate dehydrogenase complex [OS=Triticum aestivum]	0	67.534	39	16	159	2	1	542	58.3	8.4	471	434	108.12	123.36	13	14	14	15	metabolic process	organelle lumen	catalytic activity	Pf00198, Pf00364, Pf02817		TRIAE_CS42_6DS_TGACv1_544326_AA1747750			0	1.107	0.15	0.430915	0.946389	20.07	22.9151	95.5	104.5	9.7	16.81	3	3	104.1	101.9	86.7	111.6	113.1	82.6
High	Master Protein	W5HZ47	fructose-bisphosphate aldolase [OS=Triticum aestivum]	0	67.519	58	12	171	1	1	360	37.9	6.8	717	690	150.31	162.85	11	11	12	12	metabolic process		catalytic activity	Pf00274		TRIAE_CS42_7DL_TGACv1_603309_AA1980610			11	1.299	0.38	0.106877	0.701477	25.33	24.8633	80.9	119.1	13.55	3.69	3	3	74.5	78.1	95.5	114.9	122.3	114.7
High	Master Protein	A0A1D6DL76	Uncharacterized protein [OS=Triticum aestivum]	0	67.511	51	10	160	1	1	312	34.6	6.74	344	396	119.78	121.41	10	10	10	9	metabolic process		catalytic activity	Pf00248		TRIAE_CS42_U_TGACv1_645705_AA2145150			1	0.887	-0.17	0.975393	0.996973	14.84	20.8375	105	95	20.97	1.96	3	3	79.8	107.2	122.6	94.9	96.9	98.7
High	Master Protein	A0A1D6CNH4	Uncharacterized protein [OS=Triticum aestivum]	0	67.377	49	13	161	1	1	432	45.7	8.19	645	659	121.17	125.17	13	13	12	12	metabolic process		catalytic activity	Pf00044, Pf02800		TRIAE_CS42_7DL_TGACv1_603062_AA1974880			2	0.781	-0.36	0.492067	0.957414	4.59	21.5959	111.6	88.4	11.92	1.45	3	3	125.3	111	98.7	87.3	88	89.7
High	Master Protein	P04464	Calmodulin [OS=Triticum aestivum]	0	67.359	68	8	327	4	1	149	16.8	4.25	1375	1015	306.72	285.14	8	8	8	8		cytoplasm	metal ion binding;protein binding	Pf00036, Pf08726, Pf12763, Pf13202, Pf13405, Pf13499, Pf13833, Pf14658					0	0.759	-0.4	0.183283	0.820015	20.46	27.174	107	93	13.39	15.58	3	3	127.9	107.2	99	73.1	99.5	93.3
High	Master Protein	A0A1D6DLT8	Uncharacterized protein [OS=Triticum aestivum]	0	67.315	27	18	124	18	1	1090	118.7	6.3	263	270	76.55	99.05	16	16	15	15	metabolic process		catalytic activity	Pf00310, Pf01493, Pf01645, Pf04898		TRIAE_CS42_U_TGACv1_654540_AA2150720			0	1.108	0.15	0.376513	0.943753	30.52	23.8052	96.4	103.6	11.75	8.58	3	3	84.1	95.5	106.5	114.5	96.9	102.5
High	Master Protein	W5DZQ3	Uncharacterized protein [OS=Triticum aestivum]	0	67.212	46	14	186	1	1	398	43.1	4.75	355	423	130.39	115.19	14	14	13	13	response to stimulus	membrane	RNA binding	Pf00575		TRIAE_CS42_4AS_TGACv1_306602_AA1010940			0	0.849	-0.24	0.749152	0.983136	30.71	20.1911	110.5	89.5	62.96	19.79	3	3	139.2	130.6	27.2	79.1	118.2	105.8
High	Master Protein	A0A1D5SV65	Chlorophyll a-b binding protein, chloroplastic [OS=Triticum aestivum]	0	67.211	79	11	187	9	1	268	28.7	5.15	465	398	144.15	145.08	10	10	10	10	metabolic process	membrane		Pf00504		TRIAE_CS42_1BL_TGACv1_031408_AA0113420; TRIAE_CS42_1DL_TGACv1_062185_AA0210150			3	1.201	0.26	0.230322	0.884424	43.54	25.1402	95.7	104.3	21.52	14.71	3	3	67.9	102.1	101	110.1	93.3	125.6
High	Master Protein	A0A1D6RZ25	UDP-glucose 6-dehydrogenase [OS=Triticum aestivum]	0	67.106	51	11	149	3	1	369	40.8	6.34	436	428	117.29	123.6	11	10	11	11	metabolic process		catalytic activity;nucleotide binding	Pf00984, Pf03720, Pf03721		TRIAE_CS42_4BS_TGACv1_329796_AA1104090			0	0.996	-0.01	0.749137	0.983136	34.92	23.3845	100.5	99.5	26.08	14.53	3	3	94.6	86.4	138	93.6	80.1	107.3
High	Master Protein	A0A1D5RU48	Uncharacterized protein [OS=Triticum aestivum]	0	67.058	33	12	144	11	1	394	45	4.5	489	427	110.68	115.43	12	12	10	10	cell organization and biogenesis	nucleus		Pf00956		TRIAE_CS42_1AL_TGACv1_001216_AA0027060			1	0.952	-0.07	0.886542	0.990309	26.18	26.2472	107.3	92.7	15.54	3.37	3	3	117.5	110.9	86.5	97.9	91.6	95.7
High	Master Protein	A0A1D5UI70	Uncharacterized protein [OS=Triticum aestivum]	0	67.008	60	13	133	13	1	319	35.7	6.83	462	435	119.04	103.46	13	13	12	11						TRIAE_CS42_2DL_TGACv1_158260_AA0513880			0	0.966	-0.05	0.84889	0.986776	26.52	24.3011	99.8	100.2	8.9	8.31	3	3	90.5	99.2	108.2	99.5	93	109.6
High	Master Protein	A0A1D5Y2M8	Uncharacterized protein [OS=Triticum aestivum]	0	66.859	40	13	143	4	1	463	49.5	6.65	406	318	104.72	110.64	11	11	11	12			catalytic activity	Pf01150		TRIAE_CS42_4DL_TGACv1_344224_AA1145180			8	0.715	-0.48	0.109302	0.70876	15.48	25.6673	118.6	81.4	5.02	8.43	3	3	118.9	117.8	128.9	81.7	82.1	70.5
High	Master Protein	A4K4Z0	tubulin alpha chain [OS=Triticum aestivum]	0	66.821	39	12	156	1	1	449	49.9	5.2	325	321	134.61	103.78	10	10	9	10	cell organization and biogenesis	cytosol;membrane	catalytic activity;nucleotide binding;structural molecule activity	Pf00091, Pf03953	100049038	TRIAE_CS42_4DL_TGACv1_342705_AA1119990; TRIAE_CS42_4BL_TGACv1_321674_AA1063960	TUBA-5D		0
High	Master Protein	A0A1D6CIZ6	3-oxoacyl-[acyl-carrier-protein] synthase [OS=Triticum aestivum]	0	66.82	45	12	139	3	1	463	48.5	7.15	361	325	105.23	117.86	12	12	11	11	metabolic process		catalytic activity	Pf00109, Pf02801		TRIAE_CS42_7BS_TGACv1_593415_AA1951220			12	0.939	-0.09	0.908433	0.990417	19.25	25.7093	101.2	98.8	4.73	5.39	3	3	100.8	98.3	107.7	98.4	92.2	102.6
High	Master Protein	A0A1D5VWC5	Uncharacterized protein [OS=Triticum aestivum]	0	66.817	49	10	145	10	1	361	39.3	5.72	435	383	135.46	104.74	9	9	8	7	metabolic process		catalytic activity	Pf01048		TRIAE_CS42_3B_TGACv1_221867_AA0752050			0	0.735	-0.44	0.137968	0.766338	16.89	25.7424	114	86	11.6	12.11	3	3	126.2	117.4	100.1	88.6	93.9	73.9
High	Master Protein	Q5GMP4	peroxidase [OS=Triticum aestivum]	0	66.775	59	14	124	7	1	341	36.5	5.96	391	319	113.44	78.03	14	14	10	10	metabolic process;response to stimulus	extracellular	antioxidant activity;catalytic activity;metal ion binding	Pf00141, Pf01179	606365		prx		7	0.567	-0.82	0.00482456	0.104987	14.4	25.6368	126.9	73.1	44.78	9.51	3	3	204.1	93.2	107.2	61.8	72.3	61.4
High	Master Protein	A0A1D5VAG7	Uncharacterized protein [OS=Triticum aestivum]	0	66.55	61	9	196	5	1	182	20.3	4.6	839	720	175.76	180.57	9	9	8	8			metal ion binding	Pf00036, Pf13202, Pf13405, Pf13499, Pf13833, Pf14658		TRIAE_CS42_3AL_TGACv1_195082_AA0644480			5	0.851	-0.23	0.465986	0.957414	31.4	27.3485	111.6	88.4	21.73	19.17	3	3	130.3	114.7	83.5	73	107.7	90.8
High	Master Protein	A0A1D6S7T3	Uncharacterized protein [OS=Triticum aestivum]	0	66.48	56	10	165	2	1	264	28.7	5.5	589	581	123.63	130.78	9	9	10	10	cellular homeostasis;metabolic process;regulation of biological process		catalytic activity	Pf00085, Pf13098		TRIAE_CS42_6AL_TGACv1_472257_AA1520000			0	1.42	0.51	0.052588	0.516953	14.28	22.6048	83	117	8.56	7.49	3	3	75.1	81.2	89.1	111.8	128.3	114.4
High	Master Protein	A0A1D5T5B4	Uncharacterized protein [OS=Triticum aestivum]	0	66.476	43	10	156	1	1	254	28.8	4.75	759	810	135.77	132.75	9	10	8	8				Pf00012		TRIAE_CS42_1DS_TGACv1_082205_AA0264170			0	0.504	-0.99	0.0162945	0.251391	10.38	20.5551	137.8	62.2	41.63	19.41	2	3	227.8		124.2	75.9	71.1	101
High	Master Protein	A0A1D5XHY7	Uncharacterized protein [OS=Triticum aestivum]	0	66.473	31	16	128	16	1	810	86.8	7.71	197	245	100.76	75.04	15	15	11	10	transport	membrane	transporter activity	Pf01103, Pf07244		TRIAE_CS42_4BL_TGACv1_320694_AA1046430			0	0.814	-0.3	0.478401	0.957414	24.92	24.5776	115.6	84.4	6.47	15.6	3	3	114.4	104.4	118.5	83.6	76.3	102.8
High	Master Protein	A0A1D5YFX0	coatomer subunit alpha [OS=Triticum aestivum]	0	66.402	18	15	124	15	1	1218	135.9	7.02	268	184	105.89	70.98	14	15	11	11	transport	cytoplasm;Golgi;membrane	protein binding;structural molecule activity	Pf00400, Pf04053, Pf06957		TRIAE_CS42_5AL_TGACv1_374774_AA1208800			0	0.787	-0.35	0.422746	0.943753	20.57	23.5784	116.9	83.1	11.93	26.65	3	3	115.1	95.9	121.2	81.9	70	115.8
High	Master Protein	W5EQ09	Uncharacterized protein [OS=Triticum aestivum]	0	66.389	41	12	146	4	1	424	44.8	5.29	377	389	118.76	112.49	12	12	12	12			catalytic activity	Pf02458		TRIAE_CS42_4DS_TGACv1_362070_AA1176400			8	0.983	-0.02	0.858495	0.986776	21.48	25.1271	103.1	96.9	0.2	2.91	3	3	103.4	103	103.2	99.5	93.9	97
High	Master Protein	W5CX03	Uncharacterized protein [OS=Triticum aestivum]	0	66.27	51	9	116	5	1	270	29.4	4.54	535	435	104.61	103.77	8	7	8	8		organelle lumen		Pf02330		TRIAE_CS42_3B_TGACv1_220750_AA0718020			7	1.079	0.11	0.470288	0.957414	34.62	23.9681	97.5	102.5	18.89	10.37	3	3	113.1	96.9	77	95	116.2	101.8
High	Master Protein	A0A1D5Y1E2	Uncharacterized protein [OS=Triticum aestivum]	0	66.221	38	12	176	11	1	430	44.5	7.11	769	630	156.58	131.46	12	12	11	11	metabolic process		catalytic activity	Pf14541, Pf14543		TRIAE_CS42_4DL_TGACv1_343786_AA1139630			1	1.007	0.01	0.879319	0.990309	30.95	28.1047	98.8	101.2	7.22	4.76	3	3	98.9	93.1	107.4	95	104.3	101.3
High	Master Protein	A0A1D6BY13	Uncharacterized protein [OS=Triticum aestivum]	0	66.212	53	11	124	7	1	369	40.5	5.38	401	280	100.11	83.32	10	10	11	11	metabolic process		catalytic activity;protein binding	Pf00891, Pf08100		TRIAE_CS42_7AS_TGACv1_570448_AA1835810			0	0.857	-0.22	0.627774	0.980056	27.66	24.0759	104.8	95.2	33.38	27.74	3	3	80	91.6	146.3	83.3	75	123.7
High	Master Protein	A0A1D5V348	Uncharacterized protein [OS=Triticum aestivum]	0	66.154	52	16	158	4	1	477	52.2	7.58	249	271	88.51	127.91	13	13	16	16	metabolic process		catalytic activity	Pf01747, Pf14306		TRIAE_CS42_2DS_TGACv1_179614_AA0608250			0	1.414	0.5	0.0592944	0.524364	32.8	22.7626	87	113	19.14	5.84	3	3	66.6	98.3	86.7	112.4	112	124
High	Master Protein	A0A1D5UJT9	3-oxoacyl-[acyl-carrier-protein] synthase [OS=Triticum aestivum]	0	66.045	35	10	137	3	1	463	49.2	7.3	542	717	105.68	132.68	10	10	10	10	metabolic process		catalytic activity	Pf00109, Pf02801		TRIAE_CS42_2DL_TGACv1_158527_AA0520960			4	1.021	0.03	0.677227	0.983028	20.28	24.0065	98.7	101.3	8.09	5.42	3	3	89.1	104.7	99.5	107.9	102	96.8
High	Master Protein	A0A1D5ZX25	Uncharacterized protein [OS=Triticum aestivum]	0	66.035	32	14	148	2	1	739	75.8	6.99	422	434	103.03	106.01	13	13	12	12	metabolic process		catalytic activity	Pf00082, Pf02225, Pf05922		TRIAE_CS42_5DL_TGACv1_435883_AA1455910			11	0.906	-0.14	0.857388	0.986776	23.9	24.713	105.1	94.9	1.89	9.88	3	3	106.5	105.6	109.4	82.5	99.9	96.1
High	Master Protein	A0A1D5XDX2	Uncharacterized protein [OS=Triticum aestivum]	0	65.986	35	14	148	1	1	655	73	6.19	205	201	125.4	109.41	14	14	12	12	metabolic process		catalytic activity;metal ion binding	Pf00557, Pf01321		TRIAE_CS42_4AS_TGACv1_308052_AA1025520			0	0.935	-0.1	0.804445	0.984397	11.77	18.4198	103.3	96.7	35.05		3	1	121.3	222.7	132.3		123.7
High	Master Protein	A0A1D6DEU3	Uncharacterized protein [OS=Triticum aestivum]	0	65.963	70	11	208	6	1	277	28.9	6.57	355	357	150.96	190.28	11	11	10	11	metabolic process		catalytic activity	Pf06026		TRIAE_CS42_U_TGACv1_642157_AA2112370			6	1.231	0.3	0.229227	0.884424	21.18	27.4933	94.2	105.8	10.38	9.22	3	3	78.9	95.1	94.8	122	106.5	102.8
High	Master Protein	A0A1D5VBU0	Uncharacterized protein [OS=Triticum aestivum]	0	65.961	48	13	148	1	1	457	49.4	5.8	577	589	127.2	111.99	13	13	10	9				Pf00656		TRIAE_CS42_3AL_TGACv1_195497_AA0650240			13	0.854	-0.23	0.572361	0.965629	18.16	25.4136	108.2	91.8	5.43	4.64	3	3	101.7	113.1	109.9	93.3	86.9	95
High	Master Protein	W5BRM7	Uncharacterized protein [OS=Triticum aestivum]	0	65.928	51	7	185	6	1	337	35.5	7.77	444	564	150.03	165.21	7	7	7	7	metabolic process		catalytic activity	Pf00182, Pf00187		TRIAE_CS42_2DL_TGACv1_159104_AA0532500			0	0.713	-0.49	0.0973232	0.669967	11.3	26.4217	115.2	84.8	10.01	12.84	3	3	129.7	108.5	110.8	81.5	95.3	74.1
High	Master Protein	A0A1D6C999	glyceraldehyde-3-phosphate dehydrogenase [OS=Triticum aestivum]	0	65.823	52	13	161	1	1	409	43	8.34	577	585	118.51	123.92	13	13	12	12	metabolic process		catalytic activity;nucleotide binding	Pf00044, Pf02800		TRIAE_CS42_7BL_TGACv1_578576_AA1897360			0	0.843	-0.25	0.788654	0.98358	4.81	19.3411	107.2	92.8	6.37	4.18	3	3	116.5	102.9	107.3	92.9	93.8	86.8
High	Master Protein	A0A1D6BMJ6	fructose-bisphosphate aldolase [OS=Triticum aestivum]	0	65.792	55	11	159	2	1	360	37.9	6.8	714	780	144.02	160.41	10	10	11	11	metabolic process		catalytic activity	Pf00274		TRIAE_CS42_7AL_TGACv1_557283_AA1779230			0	1.183	0.24	0.263387	0.900296	23.25	22.76	91.8	108.2	15.16	7.18	3	3	80.2	89.1	107.6	105	116.4	101.7
High	Master Protein	W5EZG8	Uncharacterized protein [OS=Triticum aestivum]	0	65.759	53	15	145	4	1	426	47.8	6.13	341	229	107.85	84.45	15	14	13	13			protein binding	Pf01399		TRIAE_CS42_5AL_TGACv1_374664_AA1206090			0	0.916	-0.13	0.954101	0.994922	24.05	20.4222	105.6	94.4	27.86	15.85	3	3	102.7	74.8	132.4	91.7	84.5	113.9
High	Master Protein	A0A1D5RZF1	Uncharacterized protein [OS=Triticum aestivum]	0	65.707	23	12	182	3	1	683	73.1	5.47	475	818	137.13	154.44	12	12	12	12	metabolic process		nucleotide binding;protein binding	Pf00012, Pf06723		TRIAE_CS42_1AL_TGACv1_003472_AA0049980			0	0.959	-0.06	0.863519	0.986776	32.04	20.3106	104.6	95.4	21.07	12.83	3	3	113	109.6	75.2	99.9	114	88.2
High	Master Protein	G8IPQ3	metacaspase 4 [OS=Triticum aestivum]	0	65.669	54	13	152	1	1	405	43.9	5.38	564	589	130.29	116.46	13	13	11	10				Pf00656		TRIAE_CS42_3DL_TGACv1_250437_AA0868160			0	0.795	-0.33	0.614502	0.976279	18.23	19.5875	124.8	75.2	35.97		3	1	212.6	180.4	98.4			108.6
High	Master Protein	W5FVU7	Proteasome subunit beta [OS=Triticum aestivum]	0	65.661	65	11	131	11	1	248	27.5	7.23	360	401	97.85	105.48	11	11	10	11	metabolic process	cytoplasm;nucleus;proteasome	catalytic activity	Pf00227		TRIAE_CS42_5DL_TGACv1_435054_AA1445400			0	0.971	-0.04	0.961244	0.994968	21.72	25.7619	105.7	94.3	5.07	2.43	3	3	108.1	98.3	106.8	98.1	95.3	93.5
High	Master Protein	P93606	superoxide dismutase [OS=Triticum aestivum]	0	65.602	68	12	184	5	1	231	25.3	8.25	534	388	147.21	136.97	12	11	12	12	metabolic process;response to stimulus		antioxidant activity;catalytic activity;metal ion binding	Pf00081, Pf02777	543249		SOD3.2		0	1.033	0.05	0.632785	0.980056	36.98	24.5609	108.6	91.4	17.45	23.11	3	3	87.8	102.9	124.3	119.9	78.5	86.6
High	Master Protein	A0A1D5Y3H8	Uncharacterized protein [OS=Triticum aestivum]	0	65.586	36	16	149	9	1	673	70.8	7.94	401	381	113.25	107.04	15	16	11	13	metabolic process	membrane	catalytic activity;nucleotide binding	Pf00069, Pf07714, Pf08263, Pf13855		TRIAE_CS42_4DL_TGACv1_344741_AA1149380			8	0.992	-0.01	0.781983	0.98358	25.9	24.5591	100.8	99.2	0.53	4.57	3	3	102.6	101.5	102	100.4	92.8	100.7
High	Master Protein	A0A1D5TN20	Uncharacterized protein [OS=Triticum aestivum]	0	65.545	29	18	114	11	1	1017	114.7	6.87	260	199	100.34	58.5	15	16	10	11	metabolic process		catalytic activity	Pf00676, Pf02779		TRIAE_CS42_2AS_TGACv1_113238_AA0353310			1	0.72	-0.47	0.284346	0.918961	23.99	22.4544	131.8	68.2	11.67	67.83	3	3	104.4	113.2	131	148.9	44	58.6
High	Master Protein	A0A1D5TLC2	Uncharacterized protein [OS=Triticum aestivum]	0	65.544	28	18	131	1	1	931	106.4	6.48	200	278	95.61	92.03	16	17	14	14	metabolic process		catalytic activity	Pf00686, Pf02446		TRIAE_CS42_2AS_TGACv1_112747_AA0344470			2	1.164	0.22	0.300428	0.922441	32.01	20.4676	86.6	113.4	25.76	12.94	3	3	86.5	61.2	104.2	132.3	113.3	102.6
High	Master Protein	B2CHJ7	Photosystem II D2 protein [OS=Triticum aestivum]	0	65.537	34	9	146	9	1	353	39.5	5.55	457	415	123.11	119.37	9	9	9	8	metabolic process;transport	membrane	catalytic activity;metal ion binding	Pf00124					0	1.124	0.17	0.467186	0.957414	22.48	26.2298	97.6	102.4	6.73	13.52	3	3	88.2	100.8	93.7	98.3	96.7	122.3
High	Master Protein	W5CB91	Uncharacterized protein [OS=Triticum aestivum]	0	65.494	85	9	189	1	1	162	17.3	5.31	587	335	171.15	131.44	8	9	7	9	cellular homeostasis;metabolic process;regulation of biological process		antioxidant activity;catalytic activity	Pf00578, Pf08534		TRIAE_CS42_3AL_TGACv1_195261_AA0647060			0	0.604	-0.73	0.0630783	0.541957	1.62	22.2519	124.2	75.8	18	13.08	3	3	126.6	150.9	105.1	61.6	78.6	77.3
High	Master Protein	A0A1D5RS51	Chlorophyll a-b binding protein, chloroplastic [OS=Triticum aestivum]	0	65.455	81	10	194	1	1	266	28.2	5.27	543	395	159.12	172.53	10	10	10	10	metabolic process	membrane		Pf00504		TRIAE_CS42_1AL_TGACv1_000708_AA0017440			0	1.183	0.24	0.251633	0.888177	6.71	24.9047	92.2	107.8	3.19	9.77	3	3	92	90.6	86.5	102.3	106	122.6
High	Master Protein	A0A1D5XL42	Uncharacterized protein [OS=Triticum aestivum]	0	65.436	32	12	118	3	1	530	58.4	6.16	190	295	84.58	81.27	11	11	11	10	metabolic process		catalytic activity;metal ion binding	Pf00675, Pf05193		TRIAE_CS42_4BL_TGACv1_321498_AA1061400			0	0.847	-0.24	0.764832	0.98358	18.97	21.7223	115.2	84.8	21.93	3.91	3	3	115.8	87.5	137	85.3	90.4	84
High	Master Protein	A0A1D5W2N0	Uncharacterized protein [OS=Triticum aestivum]	0	65.426	48	15	124	15	1	520	57.5	7.06	146	226	80.87	100.89	12	13	13	13	metabolic process		catalytic activity;nucleotide binding	Pf00485		TRIAE_CS42_3B_TGACv1_223602_AA0784350			0	1.297	0.37	0.109561	0.709051	34.65	24.8201	87.9	112.1	18.79	11.97	3	3	71.8	86.3	104.6	127	100.4	110
High	Master Protein	A0A1D5V575	adenylosuccinate lyase [OS=Triticum aestivum]	0	65.351	41	15	131	3	1	542	60.1	6.06	250	284	93.75	104.99	15	15	12	12	metabolic process		catalytic activity	Pf00206, Pf08328		TRIAE_CS42_3AL_TGACv1_193807_AA0620020			0	1.147	0.2	0.211598	0.864821	65.67	21.741	136.2	63.8	46.06	16.74	3	3	151	162.4	58.3	66.9	90.7	70.8
High	Master Protein	A0A1D6AIH4	Uncharacterized protein [OS=Triticum aestivum]	0	65.291	38	11	130	2	1	510	55.1	6.9	276	448	83.81	100.97	10	10	11	11	metabolic process		catalytic activity	Pf00330		TRIAE_CS42_6AS_TGACv1_487122_AA1568340			8	1.096	0.13	0.451247	0.953825	22	25.2946	93.2	106.8	14.35	6.35	3	3	88.8	87.3	111.9	98.9	101.7	111.5
High	Master Protein	A0A1D6APK3	S-(hydroxymethyl)glutathione dehydrogenase [OS=Triticum aestivum]	0	65.269	46	11	120	11	1	381	40.7	6.81	413	416	82.46	92.1	9	10	8	8	metabolic process		catalytic activity;metal ion binding	Pf00107, Pf08240		TRIAE_CS42_6BL_TGACv1_500415_AA1604260			0	0.874	-0.19	0.685995	0.983028	19.86	25.3305	105.1	94.9	8.44	13.94	3	3	106.5	99.4	117.5	96.1	77.8	102.6
High	Master Protein	A0A0C4BK49	Proteasome subunit alpha type [OS=Triticum aestivum]	0	65.169	50	10	154	3	1	288	31.1	5.21	649	527	144.47	125.94	10	10	9	10	metabolic process	cytoplasm;nucleus;proteasome	catalytic activity	Pf00227, Pf10584		TRIAE_CS42_6AS_TGACv1_486672_AA1563920			0	0.95	-0.07	0.839454	0.986776	36.55	21.7831	115.9	84.1	22.46	5.01	3	3	140.3	118.9	88.5	79.2	86.3	86.8
High	Master Protein	A7J2I3	Plasma membrane intrinsic protein [OS=Triticum aestivum]	0	65.136	54	9	124	7	1	284	29.9	9.17	389	319	76.29	57.09	8	9	7	8	transport	membrane	transporter activity	Pf00230	100127087		AQP4		0	0.809	-0.31	0.508683	0.957414	38.76	23.5056	118.4	81.6	3.7	28.76	3	3	120.9	113.6	113.3	63.3	78.3	110.6
High	Master Protein	A0A1D6BHY6	glyceraldehyde-3-phosphate dehydrogenase [OS=Triticum aestivum]	0	65.114	51	13	157	1	1	410	43.2	8.46	566	584	112.43	122.14	13	13	12	12	metabolic process		catalytic activity;nucleotide binding	Pf00044, Pf02800		TRIAE_CS42_7AL_TGACv1_556097_AA1755410			0	0.806	-0.31	0.63388	0.980056	18.88	19.6533	121.4	78.6	22.1	21.19	3	3	85.2	125.4	131.6	106	70.6	81.2
High	Master Protein	Q8GTB8	glutathione transferase F5 [OS=Triticum aestivum]	0	65.069	54	8	148	3	1	213	23.4	6.21	421	259	112.33	93.46	8	8	8	8			catalytic activity;protein binding	Pf00043, Pf02798, Pf13409, Pf13410, Pf13417	543000		gstf5		0	0.868	-0.2	0.852571	0.986776	43.41	22.6424	101.9	98.1	7.93	18.39	3	3	95.4	97.8	110.3	94.1	118.9	83.5
High	Master Protein	A0A1D5UNJ8	Polyadenylate-binding protein [OS=Triticum aestivum]	0	65.068	29	13	139	13	1	664	72.4	8.57	442	417	107.02	96.73	13	12	12	12		cytoplasm	RNA binding	Pf00076, Pf00658, Pf08777, Pf13893, Pf14259		TRIAE_CS42_2DL_TGACv1_159437_AA0538350			0	0.933	-0.1	0.977584	0.997112	27.95	24.5481	99.7	100.3	10.26	11.87	3	3	114.9	102.1	93.8	83.2	103.4	102.6
High	Master Protein	A0A1D6CXJ5	T-complex protein 1 subunit delta [OS=Triticum aestivum]	0	64.996	37	13	130	13	1	534	57.4	6.99	329	226	107.1	71.9	12	12	11	11	metabolic process	cytoplasm	nucleotide binding;protein binding	Pf00118		TRIAE_CS42_7AL_TGACv1_558076_AA1789880; TRIAE_CS42_7DS_TGACv1_621672_AA2022840			0	0.737	-0.44	0.22884	0.884424	20.53	24.6357	115	85	5.35	16.62	3	3	120.1	107.9	115	71.8	85.1	100.2
High	Master Protein	A0A1D5RUI5	Uncharacterized protein [OS=Triticum aestivum]	0	64.992	31	10	157	8	1	461	48.1	8.13	614	707	120.81	133.55	9	9	9	9	metabolic process		catalytic activity	Pf00108, Pf02803		TRIAE_CS42_1AL_TGACv1_001320_AA0028620			0	0.857	-0.22	0.66679	0.983028	32.84	23.9544	114.8	85.2	16.31	8.4	3	3	124.8	119.6	90.9	80.6	88.7	95.4
High	Master Protein	A0A096UMZ0	Uncharacterized protein [OS=Triticum aestivum]	0	64.984	44	11	163	1	1	244	28.1	10.05	442	433	125.69	120.59	10	10	10	11				Pf00327, Pf08079		TRIAE_CS42_2DL_TGACv1_158398_AA0517540			0	0.722	-0.47	0.342859	0.942528	14.98	20.9598	118.7	81.3	37.28	11.07	3	3	134.8	134.5	63.1	92.2	78.2	97.3
High	Master Protein	W5A5C9	Uncharacterized protein [OS=Triticum aestivum]	0	64.982	39	12	162	1	1	394	43.4	7.71	439	345	124.2	121.07	12	12	12	12				Pf00557		TRIAE_CS42_1BL_TGACv1_032084_AA0125210			0	0.719	-0.48	0.363951	0.943753	15	20.5286	116.3	83.7	21.62	11.38	3	3	140.1	112.7	90.7	81.1	78.8	96.7
High	Master Protein	A0A1D5ZWQ6	glutamate dehydrogenase [OS=Triticum aestivum]	0	64.937	49	12	113	1	1	456	49	8.02	308	330	87.95	94.38	10	10	9	10	metabolic process		catalytic activity	Pf00208, Pf02812		TRIAE_CS42_5DL_TGACv1_435748_AA1454370			0	0.866	-0.21	0.849076	0.986776	11.9	21.7454	107.2	92.8	14.22	2.1	3	3	95.2	105.4	125.6	91.3	93.2	89.4
High	Master Protein	A0A1D5ZKG7	Uncharacterized protein [OS=Triticum aestivum]	0	64.895	40	16	128	2	1	719	76.7	8.22	490	337	111.27	84.35	14	15	11	11			catalytic activity;nucleotide binding	Pf01268		TRIAE_CS42_5DL_TGACv1_433148_AA1403660			13	0.762	-0.39	0.288891	0.922441	20.52	24.8023	114.4	85.6	13	10.1	3	3	114.2	95.2	123.5	85.5	82.4	99.3
High	Master Protein	W5DZW0	Uncharacterized protein [OS=Triticum aestivum]	0	64.883	59	14	157	1	1	348	37.6	8.02	692	504	130.19	126.27	13	13	13	12	metabolic process	cytosol	catalytic activity;metal ion binding	Pf00795		TRIAE_CS42_4AS_TGACv1_306984_AA1015840			13	1.049	0.07	0.713939	0.983028	25.07	25.8621	98.8	101.2	4.72	5.18	3	3	92	97.7	101.1	109.2	100	100
High	Master Protein	A0A1D5SKH1	Uncharacterized protein [OS=Triticum aestivum]	0	64.84	41	12	160	1	1	498	56.1	6.2	475	378	129.52	119.31	11	10	12	12	metabolic process		catalytic activity	Pf04107		TRIAE_CS42_1BS_TGACv1_049766_AA0161150			0	0.973	-0.04	0.764558	0.98358	19.75	20.4557	101.9	98.1	5.73	10.2	3	3	108	101.4	96.3	97.6	108.4	88.4
High	Master Protein	A0A1D6BGS4	Uncharacterized protein [OS=Triticum aestivum]	0	64.808	38	15	123	15	1	549	58.8	5.45	378	254	99.93	66.8	14	15	10	11	metabolic process		catalytic activity	Pf00501, Pf13193		TRIAE_CS42_6DS_TGACv1_544390_AA1748090			0	0.869	-0.2	0.731228	0.983028	20.65	24.4187	103.1	96.9	7.67	8.9	3	3	102.3	102.8	116.8	98.2	83.2	96.7
High	Master Protein	W5D5P0	Uncharacterized protein [OS=Triticum aestivum]	0	64.804	54	13	143	2	1	405	44	5.38	524	593	118.55	114.16	13	13	11	10				Pf00656		TRIAE_CS42_3B_TGACv1_222085_AA0757010			0	0.831	-0.27	0.686583	0.983028	14.39	20.2795	103.2	96.8	21.85	14.97	3	3	103.7	136.5	89.7	74.5	97.3	98.3
High	Master Protein	W5E1I8	Uncharacterized protein [OS=Triticum aestivum]	0	64.763	59	14	158	1	1	348	37.6	7.75	692	504	130.19	126.24	13	13	13	13	metabolic process	cytosol	catalytic activity;metal ion binding	Pf00795		TRIAE_CS42_4BL_TGACv1_321459_AA1060800			0	4.426	2.15	1.94143e-06	9.28022e-05	0	17.768	36.9	163.1			1	1		110.6			489.4
High	Master Protein	A0A1D5XQV9	Uncharacterized protein [OS=Triticum aestivum]	0	64.632	49	14	146	14	1	415	44.8	8.15	360	442	96.75	112.28	13	13	14	14	metabolic process	cytoplasm	catalytic activity;nucleotide binding;protein binding	Pf01113, Pf01118, Pf01370, Pf02774, Pf05368, Pf13460		TRIAE_CS42_4BS_TGACv1_328220_AA1084840			0	0.85	-0.23	0.618097	0.979102	17.34	24.7231	103.8	96.2	4.17	2.27	3	3	102.6	102.6	110.2	95.2	92.6	96.8
High	Master Protein	W5H0B3	Uncharacterized protein [OS=Triticum aestivum]	0	64.533	41	10	112	3	1	547	58.4	6.61	523	483	99.05	111.74	10	10	10	10		membrane	catalytic activity	Pf03662		TRIAE_CS42_6DL_TGACv1_526812_AA1692560			8	1.038	0.05	0.584274	0.969756	22.46	24.2889	93.9	106.1	11.36	5.72	3	3	93.8	85.4	106.9	106	109.8	98.1
High	Master Protein	A0A077RU32	Uncharacterized protein [OS=Triticum aestivum]	0	64.477	34	14	126	14	1	610	66	6.54	446	400	101.52	100.15	12	12	12	11			protein binding	Pf00400		TRIAE_CS42_3B_TGACv1_221049_AA0728240			0	0.86	-0.22	0.647332	0.983028	14.55	24.8003	106.7	93.3	2.29	3.16	3	3	106.6	105.9	110.5	89.1	94.7	93.2
High	Master Protein	A0A1D5WD23	Uncharacterized protein [OS=Triticum aestivum]	0	64.445	45	14	141	3	1	554	59.9	4.64	438	456	109.54	117.54	12	12	13	13			protein binding	Pf13943		TRIAE_CS42_3DL_TGACv1_249164_AA0840040			0	0.825	-0.28	0.650661	0.983028	20.57	21.775	110.8	89.2	18.93	1.71	3	3	136.8	108	94.9	85.2	88.1	87
High	Master Protein	A0A1D5Y5R8	Uncharacterized protein [OS=Triticum aestivum]	0	64.384	64	9	144	5	1	166	16.1	5.6	1244	1089	135.79	137.36	8	8	9	9			RNA binding	Pf00076, Pf13893, Pf14259		TRIAE_CS42_4DS_TGACv1_361176_AA1162660			0	0.713	-0.49	0.110522	0.712034	13.92	25.6462	119.5	80.5	17.74	8.31	3	3	141.1	116.6	99.1	78.6	88.7	76
High	Master Protein	P58311	Photosystem I P700 chlorophyll a apoprotein A1 [OS=Triticum aestivum]	0	64.353	33	13	133	13	1	750	83.1	7.11	327	307	94.75	116.73	13	13	12	12	metabolic process;transport	membrane	catalytic activity;metal ion binding	Pf00223	803163		psaA		0	0.901	-0.15	0.735341	0.983028	29.43	25.7102	102	98	18.2	18.33	3	3	89.5	95.4	124.6	82.2	91.8	116.6
High	Master Protein	A0A1D5YVJ9	malate dehydrogenase [OS=Triticum aestivum]	0	64.329	61	13	134	5	1	358	37.3	7.64	317	357	109.88	108.67	12	12	13	13	metabolic process		catalytic activity	Pf00056, Pf01073, Pf02866		TRIAE_CS42_5AS_TGACv1_394202_AA1278720			6	0.859	-0.22	0.689876	0.983028	15.14	24.2926	108.1	91.9	5.4	3.01	3	3	116.2	107.5	104.9	87.4	92.6	91.5
High	Master Protein	A0A1D5Z1Y3	Uncharacterized protein [OS=Triticum aestivum]	0	64.321	25	14	131	11	1	601	67.7	5.66	256	365	81.14	94.18	13	13	12	12	metabolic process		catalytic activity	Pf00251, Pf08244		TRIAE_CS42_5BL_TGACv1_404785_AA1310740			0	1.073	0.1	0.517553	0.957414	27.09	24.8868	98.4	101.6	12.57	12.43	3	3	84.5	108.9	98.7	115.7	90.2	102
High	Master Protein	A0A1D5UHC9	3-isopropylmalate dehydrogenase [OS=Triticum aestivum]	0	64.272	45	11	146	6	1	398	41.9	6.11	550	512	122.54	113.21	10	10	11	10	metabolic process	cytoplasm	catalytic activity;metal ion binding;nucleotide binding	Pf00180		TRIAE_CS42_2DL_TGACv1_158087_AA0508520			6	1.123	0.17	0.37363	0.943753	27.19	25.4171	92.5	107.5	6.47	5.23	3	3	87.4	93.7	99.6	110.4	108.8	100.1
High	Master Protein	A0A1D5WG76	Uncharacterized protein [OS=Triticum aestivum]	0	64.173	52	13	166	3	1	391	43.4	5.6	304	242	125.8	114.8	11	11	12	13			catalytic activity	Pf01073, Pf01370, Pf03435, Pf07993		TRIAE_CS42_3DL_TGACv1_249708_AA0855000			12	0.947	-0.08	0.990241	0.999283	23.48	25.097	100.4	99.6	4.22	5.3	3	3	108	100.5	100.4	100.4	91.1	99.6
High	Master Protein	W5ATK7	Uncharacterized protein [OS=Triticum aestivum]	0	64.162	71	12	439	4	1	153	17	4.82	1155	964	382.59	316.38	11	11	11	12	defense response;response to stimulus			Pf00407		TRIAE_CS42_2AL_TGACv1_093537_AA0282050; TRIAE_CS42_2BL_TGACv1_130389_AA0410180			9	0.711	-0.49	0.093624	0.664889	16.72	29.1339	119.7	80.3	15.91	8.17	3	3	136.7	120.7	99.1	74.6	81	87.9
High	Master Protein	W5C8D1	Uncharacterized protein [OS=Triticum aestivum]	0	64.141	58	10	170	1	1	218	23.3	4.67	529	610	129.74	118.92	8	8	9	10	metabolic process		RNA binding	Pf00043, Pf00736, Pf13410		TRIAE_CS42_2DS_TGACv1_180097_AA0610180			0	0.8	-0.32	0.452033	0.95449	16.32	23.7825	111.1	88.9	24.8	9.6	3	3	136.5	113	81.9	80.5	97.7	90.4
High	Master Protein	W5AUJ3	Uncharacterized protein [OS=Triticum aestivum]	0	64.109	45	12	157	4	1	426	45.9	5.43	273	307	102.31	120.65	11	11	12	12			catalytic activity	Pf02458		TRIAE_CS42_2AL_TGACv1_093085_AA0271650			0	0.842	-0.25	0.703261	0.983028	17.44	22.82	112.7	87.3	12.72	7.23	3	3	99.7	109	127.7	84.4	84	95.2
High	Master Protein	A0A1D5S081	Uncharacterized protein [OS=Triticum aestivum]	0	64.07	72	14	161	14	1	249	27.7	4.72	470	546	121.18	124.87	13	13	13	13						TRIAE_CS42_1AL_TGACv1_004439_AA0053530			0	1.088	0.12	0.580265	0.96801	28.89	26.3491	97.8	102.2	9.37	4.36	3	3	95.7	109.6	92.1	97	99.9	105.7
High	Master Protein	A0A1D5Y3K4	Uncharacterized protein [OS=Triticum aestivum]	0	64.056	45	8	135	1	1	286	30.6	4.67	795	722	124.36	124.27	8	8	6	6				Pf01849		TRIAE_CS42_4DL_TGACv1_344765_AA1149650			0	0.663	-0.59	0.0847335	0.627444	14.87	23.8741	119.8	80.2	27.59	13.46	3	3	147.3	124.3	83	70.1	92	83.3
High	Master Protein	A0A1D5Z8U3	Uncharacterized protein [OS=Triticum aestivum]	0	64.044	41	11	152	1	1	398	40.8	6.57	709	557	140.5	126.85	10	10	10	10	metabolic process		catalytic activity	Pf00108, Pf02803		TRIAE_CS42_5BL_TGACv1_406301_AA1343780			0	0.946	-0.08	0.842136	0.986776	7.45	19.1043	102.7	97.3	6.92	5.66	3	3	110.1	95.8	103.8	98.3	90.7	101.3
High	Master Protein	A0A1D6CXT2	Uncharacterized protein [OS=Triticum aestivum]	0	64.041	62	9	125	1	1	263	27.7	4.83	368	534	98.89	116.34	9	9	8	8	metabolic process		catalytic activity	Pf01048		TRIAE_CS42_7DS_TGACv1_621725_AA2024390			10	0.898	-0.15	0.850434	0.986776	18.93	23.7709	105.8	94.2	1.8	4.59	3	3	107.1	104.7	103.4	93.2	99.9	91.7
High	Master Protein	W5FI97	Uncharacterized protein [OS=Triticum aestivum]	0	63.989	29	13	143	1	1	764	78.6	7.39	446	430	103.76	98.93	12	12	11	12	metabolic process		catalytic activity	Pf00082, Pf02225, Pf05922		TRIAE_CS42_5BL_TGACv1_405861_AA1336630			0	0.719	-0.48	0.354582	0.942528	8.78	20.4657	116.4	83.6	18.26	24.85	3	3	125.9	133.5	93.1	59.2	97.8	90.5
High	Master Protein	A0A1D5TLQ3	Uncharacterized protein [OS=Triticum aestivum]	0	63.98	45	7	142	3	1	369	39.4	7.88	470	338	153.01	112.5	7	7	7	7	metabolic process		catalytic activity	Pf00182, Pf00187		TRIAE_CS42_2AS_TGACv1_112882_AA0346500			0	0.768	-0.38	0.338725	0.940733	19.4	23.7443	108.4	91.6	34.28	5.96	3	3	167.2	97.1	95.1	74.8	83.8	82
High	Master Protein	W5FPD7	malate dehydrogenase [OS=Triticum aestivum]	0	63.959	58	11	120	2	1	358	37.2	8.16	406	440	97.8	107.18	10	10	11	11	metabolic process		catalytic activity	Pf00056, Pf01073, Pf02866		TRIAE_CS42_5BS_TGACv1_423965_AA1385420			0	0.739	-0.44	0.336126	0.940733	8.55	21.3257	112.6	87.4	13.02	7.86	3	3	95.4	123.6	115.3	89.4	81.2	95.1
High	Master Protein	A0A0C4BKL3	Uncharacterized protein [OS=Triticum aestivum]	0	63.948	45	12	140	2	1	400	44.7	7.44	556	473	115.28	96.47	12	11	9	8	metabolic process;regulation of biological process;response to stimulus	cytoplasm	catalytic activity;nucleotide binding;protein binding;RNA binding	Pf00004, Pf00006, Pf00158, Pf00910, Pf01057, Pf01078, Pf05496, Pf06068, Pf07724, Pf07726, Pf07728, Pf13173, Pf13191, Pf13401		TRIAE_CS42_7BL_TGACv1_580047_AA1911710; TRIAE_CS42_7DL_TGACv1_604036_AA1992960			10	0.777	-0.36	0.335357	0.940733	17.12	24.8616	121.7	78.3	16.7	14.53	3	3	126.4	95.8	132.9	69.9	81.3	93.6
High	Master Protein	A0A1D5TKE5	Uncharacterized protein [OS=Triticum aestivum]	0	63.902	58	10	170	1	1	218	23.4	4.67	571	569	131.94	113.47	8	8	9	10	metabolic process		RNA binding	Pf00043, Pf00736, Pf13410		TRIAE_CS42_2AS_TGACv1_112519_AA0339790			11	0.988	-0.02	0.961446	0.995028	20.3	28.1807	109.1	90.9	17.9	16.8	3	3	121.9	110.2	84.9	79.9	111.3	91.8
High	Master Protein	W5FTE3	Uncharacterized protein [OS=Triticum aestivum]	0	63.897	44	13	125	2	1	440	47.1	5.4	288	429	74.44	102.96	13	12	13	13	cellular homeostasis;regulation of biological process	organelle lumen	catalytic activity	Pf00085, Pf13098, Pf13848, Pf13905		TRIAE_CS42_5DL_TGACv1_435322_AA1448950			0	0.78	-0.36	0.560001	0.962	22.58	20.6006	130.4	69.6	42.32	33.73	3	3	152.2	133.1	59.9	71	117.9	65.9
High	Master Protein	A0A1D6BRW2	Uncharacterized protein [OS=Triticum aestivum]	0	63.857	57	13	119	1	1	394	41.1	8.1	361	512	83.46	97.16	12	12	11	12	metabolic process		catalytic activity	Pf00056, Pf01073, Pf02866		TRIAE_CS42_7AL_TGACv1_560148_AA1801770			0
High	Master Protein	A0A1D5V8V6	Uncharacterized protein [OS=Triticum aestivum]	0	63.804	52	16	157	3	1	500	53.9	6.04	359	385	90.2	99.65	13	14	13	15	metabolic process		catalytic activity	Pf00171		TRIAE_CS42_3AL_TGACv1_194620_AA0636860			14	1.11	0.15	0.434047	0.947919	26.3	25.7378	97.2	102.8	6.74	4.86	3	3	87	97.6	98.3	111.6	103.2	102.3
High	Master Protein	A0A1D6AXV7	Uncharacterized protein [OS=Triticum aestivum]	0	63.759	38	11	124	2	1	506	54.8	6.73	270	420	81.96	90.73	10	10	11	11	metabolic process		catalytic activity	Pf00330		TRIAE_CS42_6BS_TGACv1_513942_AA1652600			0	1.046	0.06	0.62533	0.979925	18	23.2039	95	105	11.05	10.48	3	3	84.9	98.4	105.9	91.1	110.9	108.8
High	Master Protein	W5BF81	Uncharacterized protein [OS=Triticum aestivum]	0	63.639	47	11	125	2	1	348	37.5	8.44	418	439	92.72	94.56	10	10	9	9	metabolic process;response to stimulus		antioxidant activity;catalytic activity	Pf00141		TRIAE_CS42_2BL_TGACv1_130399_AA0410390			6	0.775	-0.37	0.382193	0.943753	20.9	23.5066	124.3	75.7	32.93	27.06	3	3	147.1	129.9	73.6	62.9	79.2	107.4
High	Master Protein	A0A1D5ZLT0	Chlorophyll a-b binding protein, chloroplastic [OS=Triticum aestivum]	0	63.592	80	10	188	1	1	265	28	5.43	556	486	157.69	166.43	10	10	10	10	metabolic process	membrane		Pf00504		TRIAE_CS42_5DL_TGACv1_433321_AA1409630			2	1.072	0.1	0.616959	0.97796	25.87	25.8173	101.5	98.5	9.8	16.2	3	3	85.4	103.4	99.2	92.4	96.2	123.3
High	Master Protein	A0A1D5ZRX3	Uncharacterized protein [OS=Triticum aestivum]	0	63.543	64	10	173	4	1	254	27.4	6.39	438	402	121.54	132.77	10	10	10	10				Pf01073, Pf01370, Pf05368, Pf13460		TRIAE_CS42_5DL_TGACv1_434357_AA1434470			6	1.089	0.12	0.574867	0.965629	16.32	26.9294	94.4	105.6	2.93	5.24	3	3	94.3	93.9	99	109	105.5	98.3
High	Master Protein	A0A1D5WL54	Uncharacterized protein [OS=Triticum aestivum]	0	63.443	85	9	180	2	1	162	17.3	5.31	543	338	169.03	129.03	8	9	7	9	cellular homeostasis;metabolic process;regulation of biological process		catalytic activity	Pf00578, Pf08534		TRIAE_CS42_3DL_TGACv1_251214_AA0878860			0	0.736	-0.44	0.336072	0.940733	19.88	22.9108	115.9	84.1	18.07	4.55	3	3	132.2	119.6	91.8	88.6	81.1	86.7
High	Master Protein	W5HBZ2	Uncharacterized protein [OS=Triticum aestivum]	0	63.433	38	15	152	15	1	535	58.8	5.66	407	292	107.83	96.28	14	14	14	14	metabolic process	cytoplasm;cytosol;membrane	nucleotide binding;protein binding	Pf00118		TRIAE_CS42_7BL_TGACv1_578624_AA1897960; TRIAE_CS42_7AL_TGACv1_556754_AA1770310			0	0.699	-0.52	0.10429	0.691322	12.26	25.397	116.3	83.7	5.77	14.27	3	3	124.2	111.2	114.7	82.5	71.8	95.6
High	Master Protein	W5F9T8	Uncharacterized protein [OS=Triticum aestivum]	0	63.418	59	12	137	2	1	356	37	6.28	363	351	106.1	102.19	12	12	11	10	metabolic process		catalytic activity;metal ion binding	Pf00107, Pf08240		TRIAE_CS42_5BL_TGACv1_405902_AA1337260			13	0.744	-0.43	0.168159	0.798907	11.07	25.7056	115.5	84.5	5.12	3.48	3	3	120.7	109	115.6	82.1	88	84.6
High	Master Protein	A0A1D6AUH4	Uncharacterized protein [OS=Triticum aestivum]	0	63.404	32	13	165	1	1	593	63.1	6.09	487	439	116.55	149.8	11	11	13	13	metabolic process	cytoplasm	nucleotide binding	Pf00118		TRIAE_CS42_6BS_TGACv1_513136_AA1631450			0
High	Master Protein	W5D5R6	cold induced protein [OS=Triticum aestivum]	0	63.399	54	8	153	4	1	158	16.2	4.98	568	603	115.39	116.57	8	8	8	8						TRIAE_CS42_3B_TGACv1_221903_AA0752730			4	0.811	-0.3	0.326481	0.93839	19.04	26.5208	114.4	85.6	13.89	9.2	3	3	121.1	123.3	95	77.7	92.3	90.6
High	Master Protein	A0A1D6C8L0	Uncharacterized protein [OS=Triticum aestivum]	0	63.37	56	13	123	1	1	394	41	8.54	369	527	85.05	100.92	12	12	12	13	metabolic process		catalytic activity	Pf00056, Pf01073, Pf02866		TRIAE_CS42_7BL_TGACv1_578344_AA1893330			0	1.149	0.2	0.379814	0.943753	9.7	19.0133	93.1	106.9	0.73	7.43	2	3	110	111.1		116.6	135.3	127
High	Master Protein	A0A1D6BSJ3	Uncharacterized protein [OS=Triticum aestivum]	0	63.341	62	9	113	1	1	261	27.5	4.83	293	414	88.7	99.13	9	9	8	8	metabolic process		catalytic activity	Pf01048		TRIAE_CS42_7AS_TGACv1_569187_AA1809510			0	0.913	-0.13	0.984844	0.998471	16.35	19.624	107.5	92.5	17.84	14.48	3	3	103	85.8	122.8	112.2	87.4	88.7
High	Master Protein	A0A1D6CYE6	Uncharacterized protein [OS=Triticum aestivum]	0	63.097	20	12	161	2	1	876	94.2	6.8	453	464	115.57	115.14	12	12	12	12	metabolic process		catalytic activity	Pf00070, Pf07859, Pf07992		TRIAE_CS42_7DS_TGACv1_621848_AA2027570			10	0.752	-0.41	0.199107	0.845904	12.05	25.5195	115.1	84.9	11.82	6.97	3	3	118.7	98.5	124	79.7	87.7	91.5
High	Master Protein	A0A1D6AKZ2	ATP-dependent Clp protease proteolytic subunit [OS=Triticum aestivum]	0	63.054	31	6	141	1	1	300	32.2	6.7	289	362	105.95	112.29	6	6	5	5	metabolic process		catalytic activity	Pf00574		TRIAE_CS42_6BL_TGACv1_499500_AA1584370			0	1.098	0.13	0.334798	0.940733	51.89	21.7704	102.6	97.4	9.35	20.68	3	3	105.7	101.2	88	124.9	96.1	84
High	Master Protein	A0A1D5VXC3	Importin subunit alpha [OS=Triticum aestivum]	0	63.039	37	13	131	11	1	537	58.9	6.06	507	450	106.28	102.08	13	13	11	11	transport	cytoplasm;membrane;nucleus	protein binding;transporter activity	Pf00514, Pf01749, Pf13513, Pf13646		TRIAE_CS42_3B_TGACv1_222089_AA0757070			0	0.727	-0.46	0.204304	0.855947	18.7	24.3293	124.4	75.6	16.83	21.22	3	3	135.7	96.6	123.1	68.6	74.9	101.2
High	Master Protein	A0A1D6AM44	Uncharacterized protein [OS=Triticum aestivum]	0	63.012	52	9	134	1	1	333	35.4	8.95	547	492	117.43	114.39	8	8	9	9	transport	membrane	transporter activity	Pf00230		TRIAE_CS42_6BL_TGACv1_499732_AA1590240			0	0.608	-0.72	0.115933	0.719093	9.5	20.6399	118.4	81.6	24.51	28.54	3	3	159.9	108	106.1	74.4	54.3	97.3
High	Master Protein	I0JTW5	Eukaryotic translation initiation factor 3 subunit A [OS=Triticum aestivum]	0	62.81	24	16	135	3	1	1012	116.8	9.35	394	203	94.7	67.79	13	13	13	14	cell organization and biogenesis;metabolic process;regulation of biological process	cytoplasm	protein binding;RNA binding	Pf01399					0	0.559	-0.84	0.0546803	0.516953	13.21	20.6996	129.9	70.1	13.63	34.26	3	3	143.7	118.5	111.4	57.4	63.9	105.1
High	Master Protein	A0A1D5UWL5	Uncharacterized protein [OS=Triticum aestivum]	0	62.799	27	17	135	1	1	922	105.4	6.68	190	261	96.1	90.81	16	17	13	13	metabolic process		catalytic activity	Pf00686, Pf02446		TRIAE_CS42_2DS_TGACv1_177436_AA0577070			0	1.065	0.09	0.560408	0.962	22.26	18.4951	96.9	103.1	32.13	7.42	3	3	60.8	101.8	119.7	97.1	108.4	112.2
High	Master Protein	A0A1D5YV00	Uncharacterized protein [OS=Triticum aestivum]	0	62.757	44	11	135	11	1	353	38	6.6	600	524	112.28	113.27	11	11	10	10	metabolic process	cytoplasm	catalytic activity	Pf01678, Pf02567		TRIAE_CS42_5AS_TGACv1_393869_AA1276630			0	1.08	0.11	0.508225	0.957414	20.54	25.2349	94	106	5.7	3.28	3	3	92.6	93.6	102.5	105.5	99.8	105.9
High	Master Protein	A0A1D5YES7	Uncharacterized protein [OS=Triticum aestivum]	0	62.709	43	16	99	3	1	627	67.3	6.73	146	206	80.99	67.75	13	13	12	12	metabolic process		catalytic activity	Pf00682, Pf08502		TRIAE_CS42_5AL_TGACv1_374584_AA1203910			12	0.989	-0.02	0.770271	0.98358	38.67	23.7833	95.2	104.8	15.42	10.02	3	3	90.3	85	112.9	96.5	99.4	115.8
High	Master Protein	A0A1D6SAG8	Uncharacterized protein [OS=Triticum aestivum]	0	62.707	29	14	121	2	1	667	72.6	5.62	233	261	69.84	110.03	10	10	14	13	metabolic process	membrane	catalytic activity	Pf00251, Pf08244, Pf11837		TRIAE_CS42_6BS_TGACv1_513852_AA1650710			10	1.106	0.15	0.387983	0.943753	32.91	23.8226	95.1	104.9	20.68	1.52	3	3	76	115.5	94.9	102.9	106.1	104.6
High	Master Protein	A0A1D5Z5Z9	Uncharacterized protein [OS=Triticum aestivum]	0	62.704	21	14	98	14	1	1062	121.6	5.73	465	245	111.52	60.04	13	13	9	8	transport	nucleus	protein binding	Pf03810, Pf08389, Pf08767		TRIAE_CS42_5BL_TGACv1_405570_AA1330640			0	0.657	-0.61	0.165999	0.796163	22.9	22.6189	118.4	81.6	35.16	25.7	3	3	108.8	83	164.7	64.1	75	104.4
High	Master Protein	W5ALZ8	Uncharacterized protein [OS=Triticum aestivum]	0	62.693	23	16	126	2	1	885	94.9	5.86	287	346	104.81	90.72	14	13	12	12	metabolic process	cytoplasm;cytosol	catalytic activity;nucleotide binding	Pf00587, Pf03129, Pf12745, Pf13393		TRIAE_CS42_1DS_TGACv1_081050_AA0257130			12	0.921	-0.12	0.947306	0.994922	26.66	23.9007	107.5	92.5	13.51	8.03	3	3	105.3	91	119.4	90.5	90.3	103.6
High	Master Protein	A7LM55	peptidyl-prolyl cis-trans isomerase [OS=Triticum aestivum]	0	62.68	46	7	267	1	1	171	18.3	8.34	906	787	230.19	188.31	7	7	7	7	metabolic process		catalytic activity	Pf00160					10	0.78	-0.36	0.234388	0.884424	16.97	29.0941	110.4	89.6	13.9	9.11	3	3	131	108.5	100.6	78.1	88.1	93.6
High	Master Protein	W5DQ12	Proteasome subunit beta type [OS=Triticum aestivum]	0	62.564	63	10	133	2	1	213	23.4	6.21	475	458	98.49	96.79	10	10	9	9	metabolic process	cytoplasm;nucleus;proteasome	catalytic activity	Pf00227		TRIAE_CS42_4AL_TGACv1_290433_AA0985400			10	0.955	-0.07	0.898821	0.990309	20.01	25.89	102.8	97.2	3.84	2.79	3	3	99.8	101.8	107.4	100	96.3	94.7
High	Master Protein	A0A1D5TD10	3-oxoacyl-[acyl-carrier-protein] synthase [OS=Triticum aestivum]	0	62.564	34	9	109	2	1	465	49.4	7.52	427	531	85.96	103.72	8	8	9	8	metabolic process		catalytic activity	Pf00109, Pf02801		TRIAE_CS42_2AL_TGACv1_094816_AA0303560			0	1.029	0.04	0.497763	0.957414	16.17	21.6415	99.4	100.6	9.74	10.68	3	3	86.3	101.1	103.9	114.2	92.2	102.4
High	Master Protein	A0A1D6CV49	Uncharacterized protein [OS=Triticum aestivum]	0	62.519	60	12	120	1	1	390	42.8	8.13	240	318	95.55	86.24	12	12	12	11	metabolic process		catalytic activity;nucleotide binding	Pf00724		TRIAE_CS42_7DL_TGACv1_605890_AA2008410			11	1.034	0.05	0.63501	0.980056	19.94	24.7839	100.9	99.1	9.14	12.7	3	3	97.8	89.4	107.4	116.6	96.1	92.7
High	Master Protein	U3RA73	tyrosine phosphorylation protein A [OS=Triticum aestivum]	0	62.502	29	12	117	3	1	675	74.2	7.02	417	567	106.51	97.07	11	11	8	9			catalytic activity;nucleotide binding	Pf00009, Pf00679, Pf00735, Pf01926, Pf03144					9	1.18	0.24	0.236986	0.884424	31.29	23.9182	88.8	111.2	23.46	17.36	3	3	68.9	94.8	111.6	119.6	86.6	118.7
High	Master Protein	W5FB69	Lysine--tRNA ligase [OS=Triticum aestivum]	0	62.47	31	15	117	1	1	612	68.7	5.68	331	464	88.27	91.73	15	15	12	12	metabolic process	cytoplasm	catalytic activity;nucleotide binding	Pf00152, Pf01336		TRIAE_CS42_5BL_TGACv1_406694_AA1348780			0	0.424	-1.24	0.0382844	0.436319	5.83	18.5267	140.5	59.5	38.96	37.09	2	2	269.1	152.9			112.4	65.7
High	Master Protein	W4ZP89	Uncharacterized protein [OS=Triticum aestivum]	0	62.395	56	15	171	2	1	351	37.6	5.1	429	593	123.18	128.24	14	15	15	15	metabolic process	cytoplasm	nucleotide binding	Pf00118		TRIAE_CS42_1AL_TGACv1_004495_AA0053690			0	1.072	0.1	0.395791	0.943753	18.11	21.4247	95.3	104.7	13.51	20.33	3	3	99.3	108.2	82.5	109	120.9	80.1
High	Master Protein	A0A1D6APV9	Uncharacterized protein [OS=Triticum aestivum]	0	62.368	57	11	104	10	1	251	28.8	4.37	329	271	91.92	71.17	10	9	9	8	cell organization and biogenesis	nucleus		Pf00956		TRIAE_CS42_6BL_TGACv1_500512_AA1605720			0	0.9	-0.15	0.777898	0.98358	41.2	25.3873	113.1	86.9	25.1	16.14	3	3	137.4	120	81.9	71	97.6	92.2
High	Master Protein	A0A1D5XZP7	Uncharacterized protein [OS=Triticum aestivum]	0	62.316	48	10	152	10	1	211	22.5	5.53	357	649	100.48	135.8	10	10	9	9	metabolic process;transport	membrane	transporter activity	Pf00430		TRIAE_CS42_4DL_TGACv1_343277_AA1132640			0	1.497	0.58	0.0259869	0.348185	35.66	26.5389	79.3	120.7	18.38	11.87	3	3	78	94.5	65.5	135.8	118.9	107.3
High	Master Protein	W4ZLQ2	Uncharacterized protein [OS=Triticum aestivum]	0	62.305	61	8	145	4	1	240	25.4	5.45	527	519	121.24	125.69	8	8	8	8			catalytic activity	Pf01738, Pf12695		TRIAE_CS42_1AL_TGACv1_000886_AA0021110			1	0.975	-0.04	0.986672	0.998974	15.65	25.8599	101.8	98.2	6.25	4.39	3	3	109.6	99.5	97.7	94.6	102.6	95.9
High	Master Protein	W5AGK9	Nucleoside diphosphate kinase [OS=Triticum aestivum]	0	62.285	66	8	159	1	1	151	16.7	6.8	485	520	134.81	132.49	7	8	7	8	metabolic process		catalytic activity;nucleotide binding	Pf00334		TRIAE_CS42_1DL_TGACv1_062960_AA0222280			7	1	0	0.911519	0.991839	21.63	28.8583	102.8	97.2	1.83	2.36	3	3	104.7	103.7	101	98	98.3	94.2
High	Master Protein	A0A1D5SE57	Uncharacterized protein [OS=Triticum aestivum]	0	62.28	85	10	138	1	1	112	11.4	4.34	601	586	128.82	120.38	10	10	10	10	metabolic process	ribosome	structural molecule activity			TRIAE_CS42_1BL_TGACv1_032162_AA0126200			0	2.245	1.17	0.000911975	0.0265378	79.03	19.2991	78.3	121.7	74.01	94.27	2	3		31.2	99.8	86.8	325.6	56.6
High	Master Protein	A0A077RPZ7	Uncharacterized protein [OS=Triticum aestivum]	0	62.263	30	18	126	18	1	706	80.7	6.99	424	305	100.88	68.63	16	17	13	13	metabolic process	cytoplasm	catalytic activity;nucleotide binding	Pf00587, Pf02824, Pf03129, Pf07973					0	0.772	-0.37	0.329765	0.940733	19.58	24.6308	110.2	89.8	13.85	13.23	3	3	114.6	93	122.4	93.3	76.8	99.9
High	Master Protein	A0A1D6B6K0	Uncharacterized protein [OS=Triticum aestivum]	0	62.253	57	11	140	1	1	253	26.1	9.13	418	433	102.2	95.65	11	9	11	11	metabolic process;regulation of biological process	cytoplasm	metal ion binding;nucleotide binding	Pf00166		TRIAE_CS42_6DL_TGACv1_527081_AA1698190			9	1.164	0.22	0.362319	0.943753	27.43	26.5628	91.7	108.3	11.65	7.03	3	3	81.5	102.4	88.8	104.7	118	104.7
High	Master Protein	A0A1D6S1J7	Uncharacterized protein [OS=Triticum aestivum]	0	62.238	51	11	135	1	1	275	29.8	10.15	521	432	109.31	78.73	10	10	9	9	metabolic process	ribosome	structural molecule activity	Pf00281, Pf00673		TRIAE_CS42_5AL_TGACv1_375988_AA1230110			0	1.187	0.25	0.237553	0.884424	6.8	22.627	93.4	106.6	12.09	11.87	3	3	82.2	88.8	103.8	101.3	100.6	123.2
High	Master Protein	A0A1D6BSU4	Uncharacterized protein [OS=Triticum aestivum]	0	62.207	62	14	135	1	1	384	40.6	5.94	502	486	119.41	112.87	13	13	14	14			catalytic activity	Pf00294		TRIAE_CS42_7AS_TGACv1_569246_AA1811280			11	1.107	0.15	0.411395	0.943753	28.49	24.8487	95.7	104.3	7.16	7.1	3	3	89.8	94.9	103.4	111.7	103.3	97
High	Master Protein	W4ZQ59	Uncharacterized protein [OS=Triticum aestivum]	0	62.174	82	10	134	1	1	113	11.5	4.41	601	584	126.6	120.38	9	9	10	10	metabolic process	ribosome	structural molecule activity			TRIAE_CS42_1AL_TGACv1_001626_AA0033150			10	0.938	-0.09	0.823649	0.985276	40.23	27.4324	109.1	90.9	18.16	16.57	3	3	125.2	113.1	86.7	75.3	105.4	94.2
High	Master Protein	A0A1D5UY13	Uncharacterized protein [OS=Triticum aestivum]	0	62.079	61	13	128	5	1	388	42.5	6.25	283	233	108.1	76.56	13	13	10	11	metabolic process		catalytic activity;metal ion binding	Pf03171, Pf14226		TRIAE_CS42_2DS_TGACv1_177741_AA0583600			8	0.641	-0.64	0.0578454	0.521044	15.53	24.502	118.6	81.4	3.13	23.54	3	3	120.8	122.6	128.2	55.6	84.1	88.8
High	Master Protein	W5BFA5	Uncharacterized protein [OS=Triticum aestivum]	0	62.079	47	14	145	2	1	348	38.9	6.64	457	217	127.44	92.01	14	14	14	14	metabolic process;response to stimulus	cytosol;Golgi	catalytic activity	Pf03214		TRIAE_CS42_2BL_TGACv1_131489_AA0428400			0	0.881	-0.18	0.843049	0.986776	21.73	22.8309	105.3	94.7	20.26	5.4	3	3	101.6	90.5	132.8	91.4	87	96.9
High	Master Protein	W5HG94	Uncharacterized protein [OS=Triticum aestivum]	0	62.076	61	12	130	4	1	339	36.5	4.58	508	451	95.8	99.02	11	11	9	9			protein binding	Pf00023, Pf12796, Pf13606, Pf13637, Pf13857		TRIAE_CS42_7AS_TGACv1_570511_AA1836840			10	0.942	-0.09	0.970034	0.996939	22.99	25.1151	106.9	93.1	9.91	7.16	3	3	118.3	104.3	97.6	90.8	88.1	100.8
High	Master Protein	A0A1D5WJB3	Uncharacterized protein [OS=Triticum aestivum]	0	62.016	37	11	130	3	1	494	54	5.66	388	243	110.99	93.13	10	10	9	9			protein binding	Pf05694		TRIAE_CS42_3DL_TGACv1_250631_AA0871330			0	0.655	-0.61	0.134777	0.760404	13.93	22.3457	115.6	84.4	11.59	8.64	3	3	131.2	104	116.6	74.7	88.5	85
High	Master Protein	A0A1D6C2Y9	Uncharacterized protein [OS=Triticum aestivum]	0	61.993	38	9	132	1	1	383	41.6	6.23	344	281	101.53	91.78	8	8	8	7	metabolic process		catalytic activity	Pf00112, Pf08246		TRIAE_CS42_7BL_TGACv1_576946_AA1860860			1	0.732	-0.45	0.238393	0.884424	12.33	23.7273	115.7	84.3	15.74	3.7	3	3	141.9	109.8	108.6	80	82.8	76.9
High	Master Protein	A0A1D6C852	fructose-bisphosphate aldolase [OS=Triticum aestivum]	0	61.943	57	11	169	2	1	360	37.9	6.8	731	717	148.54	163.48	11	11	11	11	metabolic process		catalytic activity	Pf00274		TRIAE_CS42_7BL_TGACv1_578216_AA1891270			0	1.432	0.52	0.0632149	0.542191	25.03	20.7009	81.4	118.6	28.11	19.6	3	3	72.8	64.6	107.9	105.9	103.8	145
High	Master Protein	A0A1D5UR29	Lipoxygenase [OS=Triticum aestivum]	0	61.924	17	12	182	1	1	912	100	6.61	363	394	148.24	124.63	11	11	12	12	metabolic process		catalytic activity;metal ion binding;protein binding	Pf00305, Pf01477		TRIAE_CS42_2DL_TGACv1_160281_AA0549000			0
High	Master Protein	A0A1D6CWL0	Uncharacterized protein [OS=Triticum aestivum]	0	61.907	62	14	131	1	1	384	40.6	6.07	497	475	118.06	105.36	13	13	13	13			catalytic activity	Pf00294		TRIAE_CS42_7DS_TGACv1_621522_AA2018250			0
High	Master Protein	A0A1D5TUK5	40S ribosomal protein S8 [OS=Triticum aestivum]	0	61.862	47	10	168	3	1	225	25.2	10.45	1136	879	152.66	145.26	10	10	10	10	metabolic process	ribosome	structural molecule activity	Pf01201		TRIAE_CS42_2BL_TGACv1_129494_AA0386090			7	0.89	-0.17	0.618417	0.979102	17.87	27.5955	104.4	95.6	3.75	11.12	3	3	108.4	102.1	109.5	81.4	99.4	99.3
High	Master Protein	W5BZG8	Uncharacterized protein [OS=Triticum aestivum]	0	61.79	71	12	360	4	1	153	17	4.82	773	666	287.17	260.69	11	11	11	12	defense response;response to stimulus			Pf00407		TRIAE_CS42_2DL_TGACv1_158937_AA0529150			0	0.677	-0.56	0.100855	0.682861	25.93	24.7736	102.9	97.1	32.92	7.02	3	3	158.5	93.9	92.2	78.3	88.7	88.5
High	Master Protein	A0A1D5U7S4	Uncharacterized protein [OS=Triticum aestivum]	0	61.706	42	11	139	2	1	401	41	6.27	743	488	132.73	104.86	11	11	8	8	metabolic process		catalytic activity	Pf00108, Pf02803		TRIAE_CS42_2BS_TGACv1_146068_AA0454610			0
High	Master Protein	A0A1D6A7E0	Uncharacterized protein [OS=Triticum aestivum]	0	61.682	58	11	144	3	1	249	25.7	8.78	369	398	105.12	102.64	11	10	11	11	metabolic process;regulation of biological process	cytoplasm	metal ion binding;nucleotide binding	Pf00166		TRIAE_CS42_6AL_TGACv1_471509_AA1510070			0	1.153	0.21	0.291143	0.922441	21.59	24.1916	94	106	12.82	16.81	3	3	88.4	106.9	84.6	93.4	127.1	99.6
High	Master Protein	A0A1D6B4W0	GrpE protein homolog [OS=Triticum aestivum]	0	61.654	36	10	134	2	1	370	40.6	4.94	502	480	110.93	98.81	8	8	10	10	metabolic process;regulation of biological process	mitochondrion;organelle lumen	enzyme regulator activity;nucleotide binding;protein binding	Pf01025		TRIAE_CS42_6DL_TGACv1_526712_AA1690320			10	1.083	0.11	0.595782	0.970428	33.02	26.6248	104.8	95.2	17.14	4	3	3	107.9	112.9	80.8	96.4	104	98
High	Master Protein	A0A1D5UVP2	Uncharacterized protein [OS=Triticum aestivum]	0	61.623	57	8	519	1	1	278	29.5	4.89	1107	1492	391.14	533.43	8	8	7	8			RNA binding	Pf00076, Pf13893, Pf14259		TRIAE_CS42_2DS_TGACv1_177289_AA0572380			0	0.832	-0.27	0.393751	0.943753	33.02	26.0264	115.9	84.1	33.68	17.24	3	3	117.3	142.9	69.9	77.4	107.3	85.1
High	Master Protein	A0A1D5UUS2	Ribulose bisphosphate carboxylase small chain [OS=Triticum aestivum]	0	61.571	59	10	234	1	1	140	15.3	8.72	313	455	134.65	166.2	10	10	9	9	metabolic process		catalytic activity	Pf00101, Pf12338		TRIAE_CS42_2DS_TGACv1_177171_AA0567580			0	0.931	-0.1	0.993235	0.999395	12.36	23.9418	103.6	96.4	13.36	5.38	3	3	102	90.4	118	102.3	92.3	95
High	Master Protein	A0A1D5YYC2	Uncharacterized protein [OS=Triticum aestivum]	0	61.559	35	14	133	9	1	658	72.4	5.22	425	401	100.84	112.2	14	14	13	13	metabolic process		catalytic activity;metal ion binding	Pf01433, Pf09127, Pf13485		TRIAE_CS42_5BL_TGACv1_404278_AA1293580			5	0.827	-0.27	0.532216	0.959919	14.1	24.4682	109.5	90.5	13.05	7.49	3	3	117.1	91.6	114.4	84.5	94.5	97.8
High	Master Protein	A0A1D6AFM7	Uncharacterized protein [OS=Triticum aestivum]	0	61.559	48	10	194	1	1	238	27	8.13	513	726	122.65	148.47	9	9	10	10	development					TRIAE_CS42_6AS_TGACv1_485764_AA1551640			13	1.107	0.15	0.519546	0.957414	40.11	26.0972	105.1	94.9	23.53	13.68	3	3	110.9	110.4	70.9	117.9	99.6	90.3
High	Master Protein	A0A1D5XY89	Uncharacterized protein [OS=Triticum aestivum]	0	61.463	54	13	154	1	1	348	37.6	8.02	596	414	123.36	118.19	13	13	12	12	metabolic process		catalytic activity	Pf00795		TRIAE_CS42_4DL_TGACv1_342914_AA1125330			0	0.801	-0.32	0.7541	0.983136	64.6	18.8647	111	89	82.37	52.52	3	3	22.5	223.7	120.2	31	96.4	106.2
High	Master Protein	A0A080YUG0	Uncharacterized protein [OS=Triticum aestivum]	0	61.403	45	12	148	2	1	391	43.3	5.6	246	206	105.64	100.22	10	10	11	11	metabolic process		catalytic activity	Pf01073, Pf01370, Pf03435, Pf07993		TRIAE_CS42_3B_TGACv1_221714_AA0748100			0	0.914	-0.13	0.96569	0.99679	9.35	22.2197	104.5	95.5	17.57	13.81	3	3	110.3	83.9	119.3	100.8	80.5	105.2
High	Master Protein	W5F8V5	Eukaryotic translation initiation factor 3 subunit E [OS=Triticum aestivum]	0	61.401	46	13	97	13	1	441	50.7	5.69	182	84	61.86	38.73	12	12	10	10	cell organization and biogenesis;metabolic process;regulation of biological process	cytoplasm	protein binding;RNA binding	Pf01399, Pf09440		TRIAE_CS42_U_TGACv1_642463_AA2118090; TRIAE_CS42_5BL_TGACv1_405701_AA1333330			0	0.825	-0.28	0.556515	0.961701	28.42	23.6769	115.6	84.4	17.8	15.86	3	3	115.5	89.2	127.9	78.1	84.2	105.1
High	Master Protein	A0A1D6ANG1	Uncharacterized protein [OS=Triticum aestivum]	0	61.188	39	9	128	9	1	430	46.5	8.56	308	411	108.19	103.35	8	7	9	8	metabolic process		catalytic activity	Pf00185, Pf02729		TRIAE_CS42_6BL_TGACv1_500079_AA1598430			0	1.037	0.05	0.646119	0.982986	19.74	25.5039	97.4	102.6	5.83	2.78	3	3	91.8	97	103.1	105.8	100.2	102.1
High	Master Protein	A0A1D5SGD9	Uncharacterized protein [OS=Triticum aestivum]	0	61.159	65	9	179	1	1	105	12.1	9.04	288	360	122.48	137.94	8	8	9	9	metabolic process	ribosome	structural molecule activity	Pf00833		TRIAE_CS42_1BL_TGACv1_033040_AA0136370			0	1.107	0.15	0.448769	0.952236	32.2	19.4236	94.9	105.1	2.69	30.57	2	2	143.3	137.9			124.9	193.9
High	Master Protein	A0A096UMD6	Histidinol dehydrogenase, chloroplastic [OS=Triticum aestivum]	0	61.15	40	11	110	1	1	475	50.6	6.32	404	691	81.98	104.41	8	8	10	11	development;metabolic process;response to stimulus		catalytic activity;metal ion binding;nucleotide binding	Pf00815		TRIAE_CS42_2BL_TGACv1_129964_AA0400580			0	0.881	-0.18	0.95136	0.994922	14.03	20.8191	106.3	93.7	36.85	1.8	3	3	58.3	112.7	128.4	102.3	99.3	99
High	Master Protein	A0A1D5VGQ8	NADH-cytochrome b5 reductase [OS=Triticum aestivum]	0	61.147	48	12	128	12	1	310	33.8	8.51	256	303	83.1	80.41	11	10	11	11	metabolic process		catalytic activity	Pf00175, Pf00970, Pf08030		TRIAE_CS42_3AS_TGACv1_210640_AA0676180			0	0.94	-0.09	0.87178	0.98942	24.8	25.7689	105.6	94.4	11.33	12	3	3	114.2	111.1	92.1	102.1	99.2	81.2
High	Master Protein	A0A1D5YIN9	Uncharacterized protein [OS=Triticum aestivum]	0	61.143	33	9	228	9	1	329	35	9.94	474	961	137.14	227.63	9	9	8	9	metabolic process			Pf02507		TRIAE_CS42_5AL_TGACv1_375383_AA1220850			0	1.437	0.52	0.0439224	0.475824	22.73	27.0259	81.8	118.2	5.28	7.48	3	3	74.7	82.4	81.6	130.5	117.8	113
High	Master Protein	A0A1D6DBD0	Uncharacterized protein [OS=Triticum aestivum]	0	61.109	27	17	117	17	1	915	99.7	6.8	314	254	90.25	89.27	14	14	14	14	metabolic process		catalytic activity;nucleotide binding	Pf00696, Pf00742, Pf01842, Pf03447, Pf13840		TRIAE_CS42_U_TGACv1_641432_AA2094970			0	0.951	-0.07	0.934663	0.992737	28.82	24.4611	106.5	93.5	18.27	14.72	3	3	83.7	102.2	121.1	89.7	89.1	114.3
High	Master Protein	E6YBC7	Plasma membrane intrinsic protein [OS=Triticum aestivum]	0	61.094	64	10	140	6	1	288	30.7	8.81	355	270	111.67	100.91	10	10	10	10	transport	membrane	transporter activity	Pf00230					3	0.897	-0.16	0.861458	0.986776	32.56	23.681	115.3	84.7	9.5	34.41	3	3	102.8	104.8	121.8	77	67.9	125.7
High	Master Protein	A0A077RXR6	obg-like ATPase 1 [OS=Triticum aestivum]	0	60.997	45	14	122	2	1	394	44.2	7.11	354	306	91.28	89.67	11	13	12	12		cytoplasm	catalytic activity;nucleotide binding	Pf01926, Pf02421, Pf06071		TRIAE_CS42_3B_TGACv1_223108_AA0776470			0	1.086	0.12	0.409558	0.943753	42.86	21.255	91.8	108.2	32.74	22.39	3	3	72.3	87.6	133.9	78.5	124.2	103.4
High	Master Protein	A0A1D5V122	Uncharacterized protein [OS=Triticum aestivum]	0	60.975	26	8	103	8	1	427	47.3	9.48	440	627	84.05	107.8	8	8	8	8				Pf03357, Pf04012		TRIAE_CS42_2DS_TGACv1_178616_AA0598410			0	1.367	0.45	0.0629316	0.541108	19.57	24.8216	85.2	114.8	6.8	2.88	3	3	79.6	91.1	84.3	118.8	112.7	113.5
High	Master Protein	A0A1D5SZW2	Chlorophyll a-b binding protein, chloroplastic [OS=Triticum aestivum]	0	60.971	71	10	196	2	1	301	32	6.68	565	453	165.33	173.09	10	10	10	10	metabolic process	membrane		Pf00504		TRIAE_CS42_1DL_TGACv1_063802_AA0230960			4	1.202	0.27	0.205892	0.857341	37.62	25.4818	102.2	97.8	18.68	24.27	3	3	71.3	100	101.4	95.8	92	139.6
High	Master Protein	A0A1D6D5H8	Uncharacterized protein [OS=Triticum aestivum]	0	60.919	50	11	145	3	1	339	36.6	4.58	508	467	99.47	111.35	11	11	10	10			protein binding	Pf00023, Pf12796, Pf13606, Pf13637, Pf13857		TRIAE_CS42_7DS_TGACv1_624677_AA2062640			0	1.137	0.19	0.319808	0.932342	48.23	24.2379	88.3	111.7	12.17	12.18	3	3	91.3	75.4	95.6	124.6	115.4	97.7
High	Master Protein	A0A1D5VBM4	Uncharacterized protein [OS=Triticum aestivum]	0	60.91	44	8	147	8	1	229	25.7	10.35	263	256	106.38	106.62	8	8	8	8	metabolic process	ribosome	structural molecule activity	Pf00572		TRIAE_CS42_3AL_TGACv1_195425_AA0649440			0	1.116	0.16	0.491157	0.957414	23.54	26.2975	96.1	103.9	14.81	4.26	3	3	75.5	98.9	98.8	105.6	114.2	106.9
High	Master Protein	A0A1D5TDT1	Uncharacterized protein [OS=Triticum aestivum]	0	60.885	42	10	124	1	1	346	37.3	8.19	415	412	94.5	93	9	9	9	9	metabolic process;response to stimulus		antioxidant activity;catalytic activity	Pf00141		TRIAE_CS42_2AL_TGACv1_095116_AA0307060			0
High	Master Protein	A0A1D5S2I7	Uncharacterized protein [OS=Triticum aestivum]	0	60.768	32	13	121	2	1	670	75	6.99	168	235	77.41	89.68	10	10	13	12	metabolic process		catalytic activity	Pf00501		TRIAE_CS42_1AS_TGACv1_019494_AA0067320			0	1.142	0.19	0.374885	0.943753	9.14	19.8659	93	107	17.34	14.2	3	3	82.7	112.9	87.1	122.8	100.2	94.4
High	Master Protein	A0A1D5RUP2	Nucleoside diphosphate kinase [OS=Triticum aestivum]	0	60.759	67	8	147	1	1	150	16.6	6.8	484	515	122.36	112.25	7	8	7	8	metabolic process		catalytic activity;nucleotide binding	Pf00334		TRIAE_CS42_1AL_TGACv1_001360_AA0029330			0	1.406	0.49	0.0589859	0.523291	60.6	22.6057	82.4	117.6	51.08	13.16	3	3	41.4	84.7	127.8	120.8	127	98.2
High	Master Protein	A0A1D6CVS5	Uncharacterized protein [OS=Triticum aestivum]	0	60.754	64	10	119	1	1	247	27.1	5.17	271	324	77.16	111.95	9	10	9	10	metabolic process		catalytic activity	Pf01596, Pf12847, Pf13578		TRIAE_CS42_7DS_TGACv1_621383_AA2013570			0	0.761	-0.39	0.486386	0.957414	19.04	20.678	113.3	86.7	43.19	15.11	3	3	84.2	102.2	184.3	87	64.1	78.3
High	Master Protein	A0A1D5TX44	Uncharacterized protein [OS=Triticum aestivum]	0	60.725	48	14	130	13	1	442	46.8	5.94	405	172	111.45	70.98	13	13	9	8	regulation of biological process;response to stimulus		protein binding;receptor activity;signal transducer activity	Pf00415, Pf13540		TRIAE_CS42_2BL_TGACv1_129900_AA0398940			1	0.67	-0.58	0.0845475	0.626999	18.14	25.3032	116.7	83.3	11.46	6.27	3	3	134.7	110.4	111.7	79.8	86.7	76.7
High	Master Protein	A0A1D5YNZ3	Uncharacterized protein [OS=Triticum aestivum]	0	60.709	42	10	154	10	1	244	26.2	9.19	505	450	118.86	142.99	9	9	10	10			RNA binding	Pf00076, Pf13893, Pf14259		TRIAE_CS42_5AL_TGACv1_377045_AA1243510			0	1.108	0.15	0.513866	0.957414	34.42	26.6559	98.3	101.7	17.64	7.01	3	3	97	121	86	100.4	104.6	91.1
High	Master Protein	A0A1D5W3J5	Uncharacterized protein [OS=Triticum aestivum]	0	60.7	13	16	102	4	1	1934	212.6	6.37	286	270	78.71	65.72	14	15	9	10			protein binding	Pf12807, Pf13374, Pf13414, Pf13424, Pf15044		TRIAE_CS42_3B_TGACv1_223855_AA0788490			6	0.782	-0.36	0.483033	0.957414	21.63	22.4368	107.6	92.4	11.65	7.44	3	3	103	121.9	98.1	88.4	88.3	100.3
High	Master Protein	W5AVC9	Histidinol dehydrogenase, chloroplastic [OS=Triticum aestivum]	0	60.683	49	12	106	2	1	475	50.5	6.05	389	635	80.95	97.18	9	9	10	11	development;metabolic process;response to stimulus		catalytic activity;metal ion binding;nucleotide binding	Pf00815		TRIAE_CS42_2AL_TGACv1_095173_AA0307780			11	1.063	0.09	0.554227	0.960787	24.45	25.0325	100.1	99.9	5.55	1.86	3	3	93	101.1	103.5	102.7	100.9	98.9
High	Master Protein	W5F8Z5	Chlorophyll a-b binding protein, chloroplastic [OS=Triticum aestivum]	0	60.564	81	11	187	8	1	263	28.3	5.29	532	485	146.32	163.33	11	11	11	11	metabolic process	membrane		Pf00504		TRIAE_CS42_5DL_TGACv1_437406_AA1466150; TRIAE_CS42_5BL_TGACv1_405399_AA1326490			1	1.066	0.09	0.653756	0.983028	27.52	26.8895	97	103	6	11.58	3	3	90	101.3	94.4	95.4	100.4	118.5
High	Master Protein	Q9ZR34	amylogenin [OS=Triticum aestivum]	0	60.543	47	14	136	2	1	348	38.8	6.64	383	184	120.99	84.35	14	14	13	13	metabolic process;response to stimulus	cytosol;Golgi	catalytic activity	Pf03214	543331	TRIAE_CS42_2DL_TGACv1_161143_AA0557040	amy		12	0.85	-0.23	0.575844	0.965989	18.29	25.3476	107.1	92.9	14.64	9.84	3	3	102.9	95.7	126	89.3	84.3	101.8
High	Master Protein	A0A1D5X1H4	Uncharacterized protein [OS=Triticum aestivum]	0	60.505	39	14	100	14	1	443	50.4	7.85	375	216	84.63	52.29	13	14	10	10			protein binding	Pf01399		TRIAE_CS42_4AL_TGACv1_288845_AA0959550			0	0.735	-0.44	0.214345	0.869273	24.78	24.8368	126	74	13.69	24.56	3	3	127.9	98.1	122.7	71.7	72	107.5
High	Master Protein	A0A1D6S8Q3	Lipoxygenase [OS=Triticum aestivum]	0	60.49	26	15	124	15	1	907	102.3	6.14	258	237	87.9	82.1	11	13	12	14	metabolic process		catalytic activity;metal ion binding;protein binding	Pf00305, Pf01477		TRIAE_CS42_6AS_TGACv1_486600_AA1563010			0	1.031	0.04	0.643483	0.981541	27.69	24.623	101.6	98.4	3.77	8.71	3	3	99.1	102.5	95.1	111.3	96.1	96
High	Master Protein	Q93XQ6	peptidyl-prolyl cis-trans isomerase [OS=Triticum aestivum]	0	60.487	46	7	259	1	1	171	18.4	8.25	841	749	222.16	179.93	7	7	7	7	metabolic process		catalytic activity	Pf00160		TRIAE_CS42_6BS_TGACv1_513961_AA1653020			0	0.912	-0.13	0.919916	0.991924	20.2	24.4109	106.4	93.6	12.93	24.94	3	3	123.9	96.6	104.8	68.5	92.1	114.1
High	Master Protein	A0A1D5X6E1	ribosomal protein [OS=Triticum aestivum]	0	60.48	24	7	135	1	1	282	31.5	10.18	226	218	93.25	91.09	7	7	7	7	metabolic process	ribosome	RNA binding;structural molecule activity	Pf00687		TRIAE_CS42_4AL_TGACv1_290319_AA0984080			0	1.013	0.02	0.703453	0.983028	9.69	23.1674	100.9	99.1	33.67	36.34	3	3	82.6	77.2	137.6	78.2	81.2	143.1
High	Master Protein	W4ZNI1	Uncharacterized protein [OS=Triticum aestivum]	0	60.275	52	14	157	3	1	461	49	7.96	680	683	123.42	128.03	14	14	14	13	metabolic process		catalytic activity	Pf00155, Pf00266, Pf01041, Pf01053, Pf01212		TRIAE_CS42_1AL_TGACv1_002391_AA0041500			11	0.9	-0.15	0.804049	0.984397	18.65	24.992	105.8	94.2	7.92	1.84	3	3	106.2	96.9	113.6	96.1	92.7	94.5
High	Master Protein	A0A1D5XWT7	Uncharacterized protein [OS=Triticum aestivum]	0	60.263	50	11	132	1	1	276	29.9	10.15	529	391	107.05	78.01	10	10	9	9	metabolic process	ribosome	structural molecule activity	Pf00281, Pf00673		TRIAE_CS42_4DL_TGACv1_342613_AA1118130			11	1.054	0.08	0.698251	0.983028	27.02	26.3548	99.1	100.9	7.63	2.14	3	3	98.1	92.3	107.3	103.3	99.2	99.9
High	Master Protein	A0A1D5SF56	Uncharacterized protein [OS=Triticum aestivum]	0	60.262	27	12	89	12	1	743	79.1	4.96	130	176	59.31	74.44	10	11	10	10	transport	membrane	transporter activity	Pf00083, Pf06609, Pf07690, Pf13347		TRIAE_CS42_1BL_TGACv1_032462_AA0130150			0	0.971	-0.04	0.878004	0.990309	27.77	24.0313	99.1	100.9	9.9	8.99	3	3	97.9	110.9	91.4	91.1	109	99.8
High	Master Protein	D8L9U6	Eukaryotic translation initiation factor 3 subunit A [OS=Triticum aestivum]	0	60.254	22	16	127	3	1	1012	117.1	9.33	353	176	92.53	61	14	14	13	14	cell organization and biogenesis;metabolic process;regulation of biological process	cytoplasm	protein binding;RNA binding	Pf01399					13	0.647	-0.63	0.0585715	0.522791	23.57	24.1799	134.7	65.3	27.47	54.81	3	3	154.9	87.7	136.4	37.5	66.2	117.2
High	Master Protein	A0A1D5T0R1	Uncharacterized protein [OS=Triticum aestivum]	0	60.171	42	14	113	11	1	523	56.6	8.06	371	302	85.77	90.9	14	14	11	11	metabolic process			Pf00291		TRIAE_CS42_1DL_TGACv1_064628_AA0235180			0	0.938	-0.09	0.954113	0.994922	24.85	25.3723	111.6	88.4	9.01	4.52	3	3	99.8	119	113.9	92.4	84.6	90.2
High	Master Protein	A0A1D6B0P4	Uncharacterized protein [OS=Triticum aestivum]	0	60.136	48	10	187	2	1	238	27.1	8.12	482	736	115.25	147.51	9	9	10	10	development					TRIAE_CS42_6BS_TGACv1_515017_AA1666680			0	1.166	0.22	0.288581	0.922441	30.3	22.6885	93.9	106.1	16.95	17.49	3	3	101.4	102.7	74.8	120.7	114.7	85.7
High	Master Protein	A0A1D5YXC6	Uncharacterized protein [OS=Triticum aestivum]	0	60.085	18	11	133	4	1	887	95.2	6.64	360	447	99.12	99.97	11	11	11	11	metabolic process		catalytic activity	Pf00070, Pf07859, Pf07992		TRIAE_CS42_5BL_TGACv1_404180_AA1288570			0	0.852	-0.23	0.676762	0.983028	9.13	23.4975	105.1	94.9	15.1	4.92	3	3	104.4	92.9	125	94.2	87.4	96
High	Master Protein	A0A1D5SBT1	Uncharacterized protein [OS=Triticum aestivum]	0	60.082	46	12	144	1	1	459	48.7	7.66	573	625	109.9	115.69	12	12	12	11	metabolic process		catalytic activity	Pf00155, Pf00266, Pf01041, Pf01053, Pf01212		TRIAE_CS42_1BL_TGACv1_031520_AA0115500			0	1.242	0.31	0.120439	0.722833	22.8	21.1486	93.9	106.1	20.03	12.35	3	3	68.5	95.2	102	126.7	107.5	100.1
High	Master Protein	A0A1D6CNM0	Uncharacterized protein [OS=Triticum aestivum]	0	60.074	70	11	144	4	1	235	25.3	5.67	587	562	130.08	110.34	11	11	10	10			protein binding	Pf00043, Pf02798, Pf13409, Pf13417		TRIAE_CS42_7DL_TGACv1_603080_AA1975400			8	0.714	-0.49	0.120091	0.722833	14.18	25.5455	118.9	81.1	4.93	2.14	3	3	116.3	116.3	126.5	79.3	82.3	79.4
High	Master Protein	A0A1D5ZH76	Uncharacterized protein [OS=Triticum aestivum]	0	60.053	35	8	124	8	1	314	34	10.89	439	507	78.82	86.84	7	7	8	8	metabolic process	ribosome	RNA binding;structural molecule activity	Pf00181, Pf03947		TRIAE_CS42_5BS_TGACv1_424220_AA1387710			0	0.961	-0.06	0.924893	0.992737	26.28	27.1894	104	96	7.25	5.38	3	3	98.4	113.5	103.9	89.2	99.1	95.9
High	Master Protein	A0A1D5WK15	Uncharacterized protein [OS=Triticum aestivum]	0	59.867	36	9	141	3	1	273	30.7	9.66	456	425	107.74	116.64	9	9	9	9	regulation of biological process;response to stimulus		nucleotide binding	Pf00025, Pf00071, Pf00503, Pf01926, Pf04670, Pf08477, Pf09439		TRIAE_CS42_3DL_TGACv1_250864_AA0874410			9	1.026	0.04	0.805415	0.984397	37.33	26.2745	96.2	103.8	3.09	11.26	3	3	94.1	98.2	100	112	89.7	106
High	Master Protein	A0A1D6S0H3	alanine--tRNA ligase [OS=Triticum aestivum]	0	59.83	14	11	152	0	1	957	104.8	6.15	367	283	100.25	96.94	10	10	10	10	metabolic process	cytoplasm;mitochondrion	catalytic activity;metal ion binding;nucleotide binding;RNA binding	Pf01411, Pf07973		TRIAE_CS42_4DS_TGACv1_361716_AA1171920			0
High	Master Protein	A0A1D6APT2	GrpE protein homolog [OS=Triticum aestivum]	0	59.801	39	9	132	1	1	327	36	4.61	473	432	111.81	96.88	8	8	9	9	metabolic process;regulation of biological process	mitochondrion;organelle lumen	enzyme regulator activity;nucleotide binding;protein binding	Pf01025		TRIAE_CS42_6BL_TGACv1_500482_AA1605380			0	1.062	0.09	0.486047	0.957414	28.9	22.4896	97	103	28.19	6.68	3	3	120.6	97.1	67.2	103.1	112.8	99.1
High	Master Protein	A0A1D5SY22	pyruvate kinase [OS=Triticum aestivum]	0	59.759	27	11	95	8	1	691	76.1	6.09	251	286	76.78	81.66	10	10	9	8	metabolic process		catalytic activity;metal ion binding	Pf00224, Pf02887, Pf04430		TRIAE_CS42_1DL_TGACv1_062999_AA0222790			0	1.045	0.06	0.54452	0.960298	18.78	22.6136	99.5	100.5	15.05	4.16	3	3	98.9	88.2	118.4	101.1	93.5	99.9
High	Master Protein	A0A1D6CAZ2	Uncharacterized protein [OS=Triticum aestivum]	0	59.744	52	14	121	1	1	389	41.9	6.58	533	476	88.2	100.26	13	13	12	12			protein binding	Pf14870		TRIAE_CS42_7BL_TGACv1_579234_AA1905560			0	0.932	-0.1	0.904035	0.990309	21.92	22.4815	103.5	96.5	27.14	12.4	3	3	72.1	108.6	126.6	84	101.3	107.4
High	Master Protein	A0A1D5TJX5	Uncharacterized protein [OS=Triticum aestivum]	0	59.74	57	8	502	1	1	277	29.5	4.89	920	1257	372.73	514.52	8	8	7	8			RNA binding	Pf00076, Pf13893, Pf14259		TRIAE_CS42_2AS_TGACv1_112398_AA0337340			8	1.041	0.06	0.744969	0.983136	62.99	28.4485	99.3	100.7	26.64	28.93	3	3	87.9	122.8	73.7	86.2	140.3	89.1
High	Master Protein	W5A8T3	Uncharacterized protein [OS=Triticum aestivum]	0	59.684	29	13	113	2	1	670	75	7.66	163	197	64.95	82.36	10	9	13	13	metabolic process		catalytic activity	Pf00501		TRIAE_CS42_1BS_TGACv1_050462_AA0172420			11	1.29	0.37	0.0959547	0.667142	32.97	23.8097	91	109	18.06	13.95	3	3	66.7	94.2	91.9	133.9	103.1	110.1
High	Master Protein	W5EL23	Uncharacterized protein [OS=Triticum aestivum]	0	59.58	30	12	107	12	1	580	64.6	7.65	211	316	55.57	88.11	9	9	11	10	metabolic process		catalytic activity;nucleotide binding	Pf00890, Pf01266, Pf01494, Pf01593, Pf01946, Pf07992, Pf13450		TRIAE_CS42_4DL_TGACv1_343828_AA1140200			0	1.298	0.38	0.106382	0.699149	25.35	24.0645	88.4	111.6	11	12.48	3	3	74.5	92.9	85.5	132.4	106.8	108
High	Master Protein	A0A096URP1	Chlorophyll a-b binding protein, chloroplastic [OS=Triticum aestivum]	0	59.53	47	8	142	8	1	286	30.8	6	372	311	110.58	117.31	7	7	8	8	metabolic process	membrane		Pf00504		TRIAE_CS42_4AL_TGACv1_291250_AA0993200; TRIAE_CS42_4DS_TGACv1_362641_AA1181180; TRIAE_CS42_4BS_TGACv1_327904_AA1078170			0	1.404	0.49	0.058592	0.522791	26.9	26.5114	88.9	111.1	11.59	16.92	3	3	73.6	85.2	92.9	138.7	103	106.6
High	Master Protein	A0A1D5T2S6	Uncharacterized protein [OS=Triticum aestivum]	0	59.478	36	9	127	9	1	326	35.4	9.44	402	327	105.31	92.82	9	9	7	7	metabolic process;transport		catalytic activity;transporter activity	Pf00231		TRIAE_CS42_1DS_TGACv1_080550_AA0249950			0	0.994	-0.01	0.817155	0.985276	21.79	25.5022	98.5	101.5	9.34	4.99	3	3	86.6	101.6	102.8	107	104.8	97.2
High	Master Protein	W5FPB3	Uncharacterized protein [OS=Triticum aestivum]	0	59.438	43	13	126	1	1	500	53.8	5.78	486	418	94.22	118.89	12	12	11	11	metabolic process	endoplasmic reticulum	catalytic activity	Pf01546, Pf04389, Pf07687		TRIAE_CS42_5BS_TGACv1_423557_AA1379400			10	1.047	0.07	0.557385	0.962	31.13	24.2957	98.3	101.7	11.22	1.27	3	3	97.7	110.1	88	100.2	102.8	101.1
High	Master Protein	A0A1D5SRA3	Uncharacterized protein [OS=Triticum aestivum]	0	59.333	53	7	142	3	1	241	25.5	5.31	521	535	126.13	110.58	7	7	7	7			catalytic activity	Pf01738, Pf12695, Pf12697		TRIAE_CS42_1DL_TGACv1_061296_AA0191610			0	0.819	-0.29	0.523413	0.957414	18.65	23.7843	112.5	87.5	16.93	8.69	3	3	117.7	123.8	88.9	81.4	96.8	91.5
High	Master Protein	A0A1D5YGZ1	Uncharacterized protein [OS=Triticum aestivum]	0	59.184	47	11	119	2	1	431	45.4	6.28	324	296	93.35	91.46	11	11	9	8	metabolic process		catalytic activity;metal ion binding	Pf00107, Pf08240		TRIAE_CS42_5AL_TGACv1_374992_AA1213520			0	0.71	-0.49	0.242681	0.886441	11.55	21.8727	117.2	82.8	16.15	15.59	3	3	138.6	100.5	116.1	82	94.1	68.7
High	Master Protein	A0A1D5V6P2	Uncharacterized protein [OS=Triticum aestivum]	0	58.925	12	15	95	3	1	1933	212.3	6.55	269	264	80.02	61.58	14	15	8	7			protein binding	Pf12807, Pf13374, Pf13414, Pf13424, Pf15044		TRIAE_CS42_3AL_TGACv1_194122_AA0626930			0	0.986	-0.02	0.747852	0.983136	70.39	19.4571	86.3	113.7	56.93	9.87	3	3	91.7	29.6	118.1	131.8	120.8	108.1
High	Master Protein	A0A1D5TDG9	Glucose-6-phosphate 1-dehydrogenase [OS=Triticum aestivum]	0	58.856	34	13	116	12	1	571	64.5	7.39	544	469	90.7	76.36	12	12	9	9	metabolic process		catalytic activity;nucleotide binding	Pf00479, Pf02781		TRIAE_CS42_2AL_TGACv1_094970_AA0305380			1	0.64	-0.64	0.0539837	0.516953	14.79	24.2652	127.6	72.4	18.85	12.04	3	3	137.3	95.3	132	71.3	74.9	89.2
High	Master Protein	A0A1D5TXE1	Uncharacterized protein [OS=Triticum aestivum]	0	58.792	52	12	129	1	1	364	38.9	7.39	541	492	110.3	101.86	10	10	11	11			catalytic activity	Pf00463, Pf13714		TRIAE_CS42_2BL_TGACv1_129938_AA0399910			0	1.031	0.04	0.551849	0.960787	13.29	21.2768	95.8	104.2	16.37	5.33	3	3	93.1	90	120.1	102.6	92.9	101.2
High	Master Protein	A0A1D6AQV9	Uncharacterized protein [OS=Triticum aestivum]	0	58.694	26	12	138	3	1	747	80.5	6.04	400	339	111	101.47	12	12	11	11	metabolic process		catalytic activity	Pf03009		TRIAE_CS42_6BL_TGACv1_500846_AA1610620			9	0.943	-0.08	0.987222	0.999237	20.27	25.256	104.8	95.2	4.59	3.29	3	3	109.2	99.6	105.5	95.7	98.1	91.9
High	Master Protein	Q5XUV3	Chloroplast inositol phosphatase-like protein [OS=Triticum aestivum]	0	58.689	48	10	117	10	1	286	32.3	9.19	413	311	82.01	82.8	8	8	10	10	cell organization and biogenesis;metabolic process			Pf11264					0	1.183	0.24	0.239078	0.88513	26.57	25.4457	90.7	109.3	3.87	8.45	3	3	89.8	93.8	86.8	119.9	101.5	108.2
High	Master Protein	A0A1D6RVM5	Uncharacterized protein [OS=Triticum aestivum]	0	58.645	30	12	124	11	1	782	85.8	5.95	403	429	100.01	90.65	12	12	11	10	transport		metal ion binding	Pf00626, Pf04810, Pf04811, Pf04815, Pf08033		TRIAE_CS42_4AS_TGACv1_306421_AA1007900			1	0.761	-0.39	0.307581	0.927275	20.77	23.9417	126.5	73.5	16.18	26.47	3	3	123	96.5	133.4	71.5	68.1	107.4
High	Master Protein	D8L9J1	Retinal dehydrogenase, putative, expressed [OS=Triticum aestivum]	0	58.602	47	14	144	1	1	500	54	5.92	346	356	87.23	89.46	13	14	12	13	metabolic process		catalytic activity	Pf00171		TRIAE_CS42_3B_TGACv1_221981_AA0754380			0	1.038	0.05	0.530945	0.959919	16.04	20.798	102.6	97.4	11.64	9.29	3	3	85.8	103.9	107.2	111.3	98.7	93
High	Master Protein	A0A096UJV2	Chlorophyll a-b binding protein, chloroplastic [OS=Triticum aestivum]	0	58.582	81	10	179	2	1	265	28.1	5.43	538	428	149.88	150.99	9	9	10	9	metabolic process	membrane		Pf00504		TRIAE_CS42_1AL_TGACv1_009365_AA0055660			0	1.203	0.27	0.230559	0.884424	28.44	25.2871	98.9	101.1	13.44	22.13	3	3	78	100.5	98.4	88.2	100.5	134.3
High	Master Protein	A0A1D6SEG1	Uncharacterized protein [OS=Triticum aestivum]	0	58.531	59	13	129	1	1	386	40.7	6.07	521	487	114.01	112.37	12	12	13	13			catalytic activity	Pf00294		TRIAE_CS42_7BS_TGACv1_592259_AA1934400			0
High	Master Protein	A0A1D5UMT7	Uncharacterized protein [OS=Triticum aestivum]	0	58.524	57	11	124	11	1	337	38.1	6.92	481	466	99.78	95.8	8	8	11	11	metabolic process	cytoplasm	catalytic activity;nucleotide binding	Pf00587		TRIAE_CS42_2DL_TGACv1_159219_AA0534730			0	1.074	0.1	0.462482	0.957414	24.12	24.3476	95.1	104.9	5.31	8.39	3	3	92.3	94	101.8	112.8	103.7	95.4
High	Master Protein	A0A1D6SAY8	Uncharacterized protein [OS=Triticum aestivum]	0	58.439	33	11	131	10	1	546	61.2	6.89	228	278	88.71	98.09	11	11	11	11			catalytic activity	Pf06202, Pf12899		TRIAE_CS42_6DL_TGACv1_526628_AA1688500			1	0.744	-0.43	0.242827	0.886441	16.7	24.2153	115.8	84.2	14.38	9.7	3	3	111.1	100.6	133	80.9	79.8	94.6
High	Master Protein	A0A1D6DIT0	60S ribosomal protein L13 [OS=Triticum aestivum]	0	58.383	46	9	146	1	1	208	24.1	10.9	639	453	126.19	103.62	8	8	7	7	metabolic process	ribosome	structural molecule activity	Pf01294		TRIAE_CS42_U_TGACv1_643417_AA2131810			0	1.046	0.06	0.589973	0.970428	19	24.7251	102.3	97.7	5.03	14.59	3	3	103.5	104.6	95.3	84.4	113.3	98.8
High	Master Protein	A0A1D6A036	Uncharacterized protein [OS=Triticum aestivum]	0	58.317	51	9	111	3	1	241	26.3	7.02	289	449	92.88	114.05	7	7	8	8	metabolic process		catalytic activity;nucleotide binding	Pf00406, Pf05191, Pf10236, Pf13207		TRIAE_CS42_5DS_TGACv1_456506_AA1472400			0	0.934	-0.1	0.996136	0.999395	26.14	23.9359	113.2	86.8	21.52	11.14	3	3	116.7	120	79.2	87.8	106.8	89.4
High	Master Protein	A0A1D5U7G3	Uncharacterized protein [OS=Triticum aestivum]	0	58.243	38	11	117	3	1	449	49.6	6.21	436	290	112.42	84.07	10	8	11	9	metabolic process	cytoplasm	catalytic activity;nucleotide binding	Pf00004, Pf00910, Pf05673, Pf07724, Pf07726, Pf07728, Pf13191, Pf13401		TRIAE_CS42_2BS_TGACv1_146004_AA0452740			9	0.689	-0.54	0.11503	0.719093	13.56	24.884	121.2	78.8	11.15	11.2	3	3	125.4	104.3	128.9	71	81.5	89
High	Master Protein	A0A1D5X9J3	Uncharacterized protein [OS=Triticum aestivum]	0	58.206	55	13	134	1	1	402	45.8	8.91	396	253	114.15	83.59	13	13	12	12	metabolic process		catalytic activity	Pf00232		TRIAE_CS42_4AL_TGACv1_293009_AA0999980			0	0.592	-0.76	0.202437	0.852718	8.02	18.7862	122.5	77.5	10.14	33.07	2	3	154.8	178.7		106.3	105.3	54.9
High	Master Protein	A0A1D5YB04	Uncharacterized protein [OS=Triticum aestivum]	0	58.162	36	12	110	3	1	462	49.4	6.46	493	315	97.78	78.56	10	10	9	10			catalytic activity	Pf01150		TRIAE_CS42_5AL_TGACv1_373974_AA1186170			0	0.548	-0.87	0.0277857	0.364617	8.63	22.6235	131.4	68.6	19.51	9.86	3	3	129.6	160.4	108.8	60.2	73.4	67.6
High	Master Protein	A0A1D5WS24	isocitrate dehydrogenase [NADP] [OS=Triticum aestivum]	0	58.09	39	14	112	7	1	414	46.6	6.67	384	307	84.88	70.04	14	13	9	8	metabolic process		catalytic activity;metal ion binding;nucleotide binding	Pf00180, Pf01960		TRIAE_CS42_3DS_TGACv1_271913_AA0910770			0	0.827	-0.27	0.666595	0.983028	29.72	21.8303	95.7	104.3	32.76	24.24	3	3	82.3	78.3	136.3	129.1	84.3	89.7
High	Master Protein	A0A1D5VJT5	Uncharacterized protein [OS=Triticum aestivum]	0	58.087	39	11	129	4	1	303	32.6	5.53	452	625	110.5	127.85	10	10	11	11				Pf04832		TRIAE_CS42_3AS_TGACv1_211670_AA0692840			8	0.874	-0.2	0.657251	0.983028	17.62	25.4131	104.2	95.8	3.17	3.17	3	3	101	107.6	104	98.9	95.7	92.8
High	Master Protein	A0A1D6AM07	Uncharacterized protein [OS=Triticum aestivum]	0	58.069	49	10	148	2	1	302	32.8	6.54	570	554	106.02	117.53	9	9	10	10	cellular homeostasis;metabolic process;regulation of biological process		catalytic activity	Pf00085, Pf13098		TRIAE_CS42_6BL_TGACv1_499707_AA1589610			11	1.298	0.38	0.101268	0.683726	24.97	25.6299	87.4	112.6	8.12	4.22	3	3	80.4	86.4	94.5	118.3	111.3	109.2
High	Master Protein	W5BCG4	peroxidase [OS=Triticum aestivum]	0	57.982	53	13	116	6	1	341	36.6	6.29	259	200	102.3	63.92	13	13	11	11	metabolic process;response to stimulus	extracellular	antioxidant activity;catalytic activity;metal ion binding	Pf00141		TRIAE_CS42_2BL_TGACv1_130218_AA0406480			0	0.474	-1.08	0.000546325	0.0166767	10.57	24.0826	133	67	46.83	17.29	3	3	211.1	85.5	119.6	60.2	72.4	51.3
High	Master Protein	W5AC26	Uncharacterized protein [OS=Triticum aestivum]	0	57.872	23	15	118	1	1	887	95	5.95	281	310	99.88	79.54	13	12	11	11	metabolic process	cytoplasm;cytosol	catalytic activity;nucleotide binding	Pf00221, Pf00587, Pf03129, Pf12745, Pf13393		TRIAE_CS42_1BS_TGACv1_050107_AA0167510			0	0.736	-0.44	0.36981	0.943753	11.39	19.7958	113	87	19.39	13.87	3	3	140.3	115	95.1	70	88.5	91.1
High	Master Protein	A0A1D5Z9M9	glutamate dehydrogenase [OS=Triticum aestivum]	0	57.804	48	12	94	1	1	469	50.3	8.28	274	299	69	80.51	9	9	9	10	metabolic process		catalytic activity	Pf00208, Pf02812		TRIAE_CS42_5BL_TGACv1_406581_AA1347380			12	1.017	0.02	0.678461	0.983028	31.43	24.2074	99.9	100.1	2.87	14.18	3	3	101.4	96.6	101.6	113.5	85.2	101.7
High	Master Protein	A0A1D6B1Q1	Uncharacterized protein [OS=Triticum aestivum]	0	57.798	51	14	135	2	1	426	46.8	5.91	357	339	107.47	89.43	14	14	12	11	metabolic process		catalytic activity	Pf01557, Pf09298		TRIAE_CS42_6BS_TGACv1_515718_AA1672020			12	1.003	0	0.849925	0.986776	24.27	25.7744	102.7	97.3	4.5	3.42	3	3	103.9	95.8	103.5	102.6	96	98.1
High	Master Protein	A0A1D6A475	Uncharacterized protein [OS=Triticum aestivum]	0	57.767	39	11	115	3	1	491	52.7	9.26	404	284	105.42	84.49	10	9	10	10	metabolic process		catalytic activity	Pf00291		TRIAE_CS42_5DS_TGACv1_457957_AA1491100			9	1.004	0.01	0.76691	0.98358	20.63	25.2318	99.7	100.3	3.4	3.04	3	3	98.4	99.9	105	95.4	100.5	100.7
High	Master Protein	A0A1D5YUY0	dihydrolipoamide acetyltransferase component of pyruvate dehydrogenase complex [OS=Triticum aestivum]	0	57.621	41	10	139	4	1	456	47.4	7.94	282	284	114.75	101.93	9	9	8	9	metabolic process		catalytic activity	Pf00198, Pf00364, Pf02817		TRIAE_CS42_5AS_TGACv1_393835_AA1276350			6	1.053	0.07	0.567422	0.962036	18.44	24.5741	103.3	96.7	9.32	2.41	3	3	90.1	105.2	107.3	97.1	98.6	101.8
High	Master Protein	A0A1D6DKE2	Uncharacterized protein [OS=Triticum aestivum]	0	57.616	39	12	123	1	1	466	50.3	6.83	456	554	96.4	100.63	10	10	12	12						TRIAE_CS42_U_TGACv1_644502_AA2140050			0	1.017	0.02	0.68339	0.983028	24.22	18.6613	99.2	100.8	26.05	2.96	3	3	100.5	120.1	70	100.7	102.2	106.6
High	Master Protein	A0A1D5T5P0	Uncharacterized protein [OS=Triticum aestivum]	0	57.614	51	12	125	1	1	380	40.1	6.57	542	491	102.71	101.84	10	10	11	11			catalytic activity	Pf00463, Pf10477, Pf13714		TRIAE_CS42_2AL_TGACv1_092931_AA0267430			10	0.904	-0.15	0.85017	0.986776	15.78	24.7485	103.6	96.4	2.75	3.52	3	3	102.6	102.8	107.7	98.9	95.7	92.2
High	Master Protein	W5BH26	Uncharacterized protein [OS=Triticum aestivum]	0	57.614	41	9	168	4	1	301	34.5	9.26	573	545	141.2	104.81	9	9	7	7	metabolic process	ribosome	RNA binding;structural molecule activity	Pf00861, Pf14204		TRIAE_CS42_2BL_TGACv1_130375_AA0409820			0	0.947	-0.08	0.867122	0.987526	17.46	22.4559	104.3	95.7	5.51	23.06	3	3	98.5	91.2	101.6	88	130.2	90.4
High	Master Protein	A0A1D6DDP4	Uncharacterized protein [OS=Triticum aestivum]	0	57.574	32	15	123	15	1	720	80.7	5.36	352	451	85.28	105.92	14	14	14	14			protein binding	Pf00930, Pf07676		TRIAE_CS42_U_TGACv1_641877_AA2106450			0	1.093	0.13	0.412959	0.943753	21.06	24.4007	96.2	103.8	6.63	9.85	3	3	86.8	94.1	99.2	118.7	99.5	101.6
High	Master Protein	A0A1D5V7I2	Uncharacterized protein [OS=Triticum aestivum]	0	57.537	39	10	116	1	1	278	30.3	10.17	238	321	79.7	87.22	9	9	9	9	metabolic process	ribosome	RNA binding;structural molecule activity	Pf00333, Pf03719		TRIAE_CS42_3AL_TGACv1_194296_AA0630660			0	1.086	0.12	0.345838	0.942528	28.56	21.4624	95.9	104.1	27.37	14	3	3	98.6	70.2	123.6	86.4	107.1	114.1
High	Master Protein	A0A068AZ53	FVE [OS=Triticum aestivum]	0	57.52	37	9	125	1	1	455	50.3	6.44	240	173	93.09	87.66	9	9	8	8		nucleus	protein binding	Pf00400, Pf12265					9	0.849	-0.24	0.45632	0.956449	17.85	26.0182	102.7	97.3	1.54	2.2	3	3	101.4	102.9	104.6	98.8	94.7	97.6
High	Master Protein	A0A1D5UKZ4	40S ribosomal protein S8 [OS=Triticum aestivum]	0	57.463	47	10	154	3	1	225	25.2	10.45	932	953	135.6	129.6	10	10	10	10	metabolic process	ribosome	structural molecule activity	Pf01201		TRIAE_CS42_2DL_TGACv1_158789_AA0526140			0	1.04	0.06	0.454787	0.956449	47.27	21.6709	115.7	84.3	28.64	19.96	3	3	134	120.5	74.2	73.8	87.8	109.6
High	Master Protein	A0A1D6B0G8	Uncharacterized protein [OS=Triticum aestivum]	0	57.419	32	16	95	1	1	726	78.6	9.16	167	154	76.33	45.94	15	15	11	9	metabolic process		catalytic activity	Pf00378, Pf00725, Pf02737		TRIAE_CS42_6BS_TGACv1_514913_AA1665850			16	0.676	-0.56	0.093612	0.664889	15.96	23.9946	113	87	24.49	8.73	3	3	108.1	95	150.2	83.1	74.7	89
High	Master Protein	W5H1E3	Uncharacterized protein [OS=Triticum aestivum]	0	57.407	44	9	192	1	1	238	27.1	8.12	613	735	134	148.38	8	8	9	9	development	membrane;mitochondrion	metal ion binding			TRIAE_CS42_6DS_TGACv1_542653_AA1726620			0	1.221	0.29	0.135592	0.762844	28.78	21.4927	84.7	115.3	20.65	12.05	3	3	81	109.1	74.9	125.8	110.3	99
High	Master Protein	A0A1D5XDW6	Uncharacterized protein [OS=Triticum aestivum]	0	57.365	44	10	116	5	1	273	30.8	6.42	325	286	75.77	76.84	7	8	8	9			protein binding	Pf13409, Pf13410, Pf13417		TRIAE_CS42_4AS_TGACv1_308030_AA1025340			0	0.681	-0.56	0.110511	0.712034	18.19	24.7455	123.9	76.1	17.59	7	3	3	125.5	96.4	137.3	86.8	77.1	77
High	Master Protein	A0A1D5UBI3	Uncharacterized protein [OS=Triticum aestivum]	0	57.259	50	9	142	2	1	218	23.3	4.67	665	643	111.61	94.06	7	7	8	9	metabolic process		RNA binding	Pf00736		TRIAE_CS42_2BS_TGACv1_146875_AA0474500			0	0.866	-0.21	0.774672	0.98358	19.76	23.1243	104.5	95.5	13.58	10.42	3	3	114.1	109.7	87.8	84.7	100.3	103.4
High	Master Protein	A0A1D6BRX6	Uncharacterized protein [OS=Triticum aestivum]	0	57.212	51	11	110	1	1	390	43.1	8.37	193	317	86.05	82.53	11	11	11	10	metabolic process		catalytic activity;nucleotide binding	Pf00724		TRIAE_CS42_7AL_TGACv1_560239_AA1801960			0	0.951	-0.07	0.865447	0.987434	16.34	19.9602	109	91	13.01	8.58	3	3	111.7	87.8	110.5	106.2	92.3	91.5
High	Master Protein	A0A1D5V8Z7	Uncharacterized protein [OS=Triticum aestivum]	0	57.184	43	15	139	12	1	610	67.5	6.64	265	293	79.43	116.79	13	13	15	15				Pf00291		TRIAE_CS42_3AL_TGACv1_194658_AA0637320			3	1.145	0.2	0.338992	0.940733	23.03	25.2875	94.8	105.2	6.26	4.29	3	3	86.7	95.9	97.6	102.1	111.3	106.4
High	Master Protein	A0A1D5YMA0	obg-like ATPase 1 [OS=Triticum aestivum]	0	57.039	39	11	128	11	1	439	47.4	6.47	384	507	81.79	97.96	11	10	11	11		cytoplasm	catalytic activity;nucleotide binding	Pf01926, Pf02421, Pf06071		TRIAE_CS42_5AL_TGACv1_376389_AA1236210			0	1.153	0.21	0.312726	0.93075	20.83	24.9423	92.7	107.3	3.22	6.06	3	3	90.3	96.4	93.3	112.3	99.6	108
High	Master Protein	W5D157	Uncharacterized protein [OS=Triticum aestivum]	0	56.978	44	14	134	3	1	554	59.9	4.65	321	409	87.1	118.01	12	12	14	14			protein binding	Pf13943		TRIAE_CS42_3B_TGACv1_221830_AA0750860			9	0.862	-0.21	0.632605	0.980056	15.35	25.2345	106.5	93.5	8.18	4.83	3	3	117	99.7	105.7	92.7	88	96.9
High	Master Protein	W5H2N5	Chlorophyll a-b binding protein, chloroplastic [OS=Triticum aestivum]	0	56.972	80	10	169	2	1	266	28.2	5.43	512	398	146.15	142.27	9	9	9	9	metabolic process	membrane		Pf00504		TRIAE_CS42_6DS_TGACv1_543042_AA1734510			0	1.071	0.1	0.425224	0.943753	17.04	21.9142	96.6	103.4	6.56	16.18	3	3	91	103.7	98.3	84.5	105.2	117.3
High	Master Protein	A0A1D5WCI0	Uncharacterized protein [OS=Triticum aestivum]	0	56.886	39	12	129	5	1	428	48.3	5.72	263	250	86.54	70.42	10	10	9	9			nucleotide binding	Pf00270, Pf00271, Pf14617		TRIAE_CS42_3DL_TGACv1_249055_AA0836300			9	0.991	-0.01	0.81408	0.985276	26.42	25.0065	99.3	100.7	7.98	9.06	3	3	105.6	90.1	96.7	113.2	96.2	98.2
High	Master Protein	A0A1D5TIE5	Uncharacterized protein [OS=Triticum aestivum]	0	56.876	49	9	104	5	1	290	30.4	8.15	730	584	65.79	67.46	8	9	7	8	transport	membrane	transporter activity	Pf00230		TRIAE_CS42_2AS_TGACv1_112094_AA0330100			5	0.777	-0.36	0.359286	0.943753	25.84	24.3605	104.7	95.3	38.4	22.58	3	3	83.1	91.7	161.6	70.6	83.5	109.5
High	Master Protein	A0A1D5TDX1	Uncharacterized protein [OS=Triticum aestivum]	0	56.875	51	12	148	2	1	237	27.2	10.01	344	424	111.57	115.05	11	11	11	12				Pf00327, Pf08079		TRIAE_CS42_2AL_TGACv1_095156_AA0307530			0	1.113	0.15	0.262939	0.899462	54.19	21.6756	110.5	89.5	16.56	16.17	3	3	112.5	112.2	82.9	90.9	115.4	86
High	Master Protein	A0A1D5V288	Uncharacterized protein [OS=Triticum aestivum]	0	56.86	52	8	131	8	1	221	23.5	8.68	416	520	101.49	116.75	8	8	7	7				Pf00478, Pf00571		TRIAE_CS42_2DS_TGACv1_179029_AA0603710			0	1.221	0.29	0.19719	0.841138	33.77	25.2033	96.6	103.4	11.7	14.36	3	3	97.3	99.3	79.7	104.2	124.9	94.6
High	Master Protein	A0A1D6CMV8	Uncharacterized protein [OS=Triticum aestivum]	0	56.831	41	12	111	1	1	370	39.6	8.27	433	275	101.48	64.42	10	11	9	9				Pf04862		TRIAE_CS42_7DL_TGACv1_602906_AA1971650			0	0.122	-3.03	5.77316e-14	3.83588e-12	0.11	19.3873	178.2	21.8	11.57		3	1	175.4	217.6	184.4	22.6
High	Master Protein	A0A1D6CJD6	Uncharacterized protein [OS=Triticum aestivum]	0	56.827	20	12	142	3	1	885	95.1	6.95	406	399	99.1	100.77	11	11	12	11	metabolic process		catalytic activity	Pf00070, Pf07859, Pf07992, Pf12697		TRIAE_CS42_7BS_TGACv1_593587_AA1952730			0	0.756	-0.4	0.392201	0.943753	7.05	22.3581	113.4	86.6	3.43	3.67	3	3	117.2	115	109.6	82.4	87.8	88
High	Master Protein	A0A1D5Z0H9	Proteasome subunit beta type [OS=Triticum aestivum]	0	56.796	55	10	106	10	1	251	27.8	7.27	392	287	87.69	80.7	8	8	10	10	metabolic process	cytoplasm;nucleus;proteasome	catalytic activity	Pf00227		TRIAE_CS42_5BL_TGACv1_404562_AA1304240			0	0.939	-0.09	0.830086	0.986701	17.89	25.8455	104.3	95.7	6.14	2.12	3	3	112.2	99.8	103	97.1	94.6	93.2
High	Master Protein	W5EP15	Uncharacterized protein [OS=Triticum aestivum]	0	56.719	53	11	121	2	1	314	33.2	6.8	370	433	91.63	87.45	11	11	8	8	metabolic process		catalytic activity	Pf01680, Pf05690		TRIAE_CS42_4DS_TGACv1_361926_AA1174400			0	1.062	0.09	0.427745	0.945676	36.18	21.4279	108.7	91.3	24.19	15.54	3	3	79	111.9	130.1	78.1	106.9	94
High	Master Protein	Q7XYE0	NADPH-dependent mannose 6-phosphate reductase [OS=Triticum aestivum]	0	56.594	51	9	88	2	1	274	30.1	6.9	314	326	42.75	41.22	5	9	5	8	metabolic process	membrane	catalytic activity	Pf00248	542905		LOC542905		0	1.444	0.53	0.0802822	0.61009	26.19	19.6793	81.8	118.2	26.59	12.15	3	3	67.7	76.8	110.6	110.9	130.5	103.5
High	Master Protein	A0A1D6DIM7	obg-like ATPase 1 [OS=Triticum aestivum]	0	56.551	43	14	120	2	1	394	44.3	6.95	360	286	87.84	86.02	11	13	13	13		cytoplasm	catalytic activity;nucleotide binding	Pf01926, Pf02421, Pf06071		TRIAE_CS42_U_TGACv1_643356_AA2131110; TRIAE_CS42_3B_TGACv1_223108_AA0776480			12	0.81	-0.3	0.449054	0.952345	26.62	24.7978	114	86	19.75	15.13	3	3	118.4	86.7	128.9	75	89.3	101.8
High	Master Protein	M4VSR0	low temperature-responsive RNA-binding protein [OS=Triticum aestivum]	0	56.337	64	9	145	5	1	162	15.9	5.6	1084	990	125.2	128.31	8	8	9	9			RNA binding	Pf00076, Pf13893, Pf14259		TRIAE_CS42_4AL_TGACv1_289601_AA0973830			6	0.762	-0.39	0.189539	0.830347	16.91	28.7097	115.6	84.4	18.81	5.7	3	3	120	124.5	86.6	87.7	95.4	85.7
High	Master Protein	A0A1D5UJM4	Uncharacterized protein [OS=Triticum aestivum]	0	56.287	34	15	133	4	1	590	64.7	5.36	234	322	86.72	100.46	12	12	14	14	metabolic process		catalytic activity	Pf00251, Pf08244		TRIAE_CS42_2DL_TGACv1_158494_AA0520130			10	0.984	-0.02	0.860247	0.986776	36.81	25.5126	108.9	91.1	26.91	29.78	3	3	70.5	123.3	101.8	85.2	136.3	82.8
High	Master Protein	A0A1D5VH82	ubiquitinyl hydrolase 1 [OS=Triticum aestivum]	0	56.269	22	13	112	2	1	830	92.7	5.43	144	139	62.24	75.13	12	12	11	11	metabolic process		catalytic activity;metal ion binding;protein binding	Pf00443, Pf00627, Pf02148, Pf13423		TRIAE_CS42_3AS_TGACv1_210799_AA0679350			13	0.832	-0.27	0.443369	0.948636	20.14	25.6464	92.8	107.2	7.78	0.94	3	3	88.7	91.3	102.5	105	106.9	105.5
High	Master Protein	A0A1D5T356	Uncharacterized protein [OS=Triticum aestivum]	0	56.224	50	14	125	1	1	482	52.8	6.55	275	195	99.22	76.81	14	14	10	10	metabolic process		catalytic activity	Pf00155		TRIAE_CS42_1DS_TGACv1_080749_AA0253170			0	0.62	-0.69	0.11305	0.716739	5.07	20.1503	123.6	76.4	12.7	8.1	3	3	129.5	133	104.5	82.5	80	70.6
High	Master Protein	A0A1D6B5C0	Uncharacterized protein [OS=Triticum aestivum]	0	56.222	38	11	147	1	1	431	46.8	7.11	185	237	90.95	101.4	11	11	11	11	metabolic process;response to stimulus	membrane	antioxidant activity;catalytic activity	Pf00141		TRIAE_CS42_6DL_TGACv1_526775_AA1691860			0	2.166	1.11	0.00494679	0.106658	48.78	18.8287	81	119	39.11	28.56	3	3	81.7	81.1	36.4	119.2	176.9	104.8
High	Master Protein	A0A1D5SJ26	Uncharacterized protein [OS=Triticum aestivum]	0	56.203	50	14	119	1	1	482	52.8	6.55	282	206	94.56	74.28	14	14	10	10	metabolic process		catalytic activity	Pf00155		TRIAE_CS42_1BS_TGACv1_049437_AA0153690			10	0.723	-0.47	0.165723	0.796136	10.4	25.1304	117.7	82.3	13.54	3.38	3	3	130.2	99.3	120.2	85.9	84	80.3
High	Master Protein	A0A1D6CAY4	Uncharacterized protein [OS=Triticum aestivum]	0	56.172	41	12	107	1	1	370	39.5	8.1	419	275	93.64	64.42	10	11	9	9				Pf04862		TRIAE_CS42_7BL_TGACv1_579216_AA1905380			11	0.451	-1.15	5.244e-05	0.00212889	5.06	25.5564	139	61	6.27	15.2	3	3	138.7	129.4	146.7	52.8	71.5	60.8
High	Master Protein	A0A1D5VA29	Uncharacterized protein [OS=Triticum aestivum]	0	56.104	55	13	124	7	1	429	47.7	5.6	217	236	99.49	89.87	12	11	12	10				Pf01370		TRIAE_CS42_3AL_TGACv1_194946_AA0642470			6	0.954	-0.07	0.963379	0.995491	24.74	25.0011	98.2	101.8	19.09	5.14	3	3	85.2	96.9	123.2	100.5	92.4	101.8
High	Master Protein	W5DQV9	Adenylyl cyclase-associated protein [OS=Triticum aestivum]	0	56.067	37	12	120	4	1	475	50.5	7.11	400	511	114.91	104.55	11	11	12	12	cell organization and biogenesis		protein binding			TRIAE_CS42_4AL_TGACv1_291018_AA0991380			8	0.924	-0.11	0.932545	0.992737	14.33	24.7723	105.5	94.5	3.23	6.35	3	3	105.9	106.1	100.2	90.4	94.9	102.4
High	Master Protein	A0A1D5SI36	Proteasome subunit beta type [OS=Triticum aestivum]	0	56.016	61	10	121	0	1	244	26.1	5.58	560	542	87.21	73.67	9	10	9	10	metabolic process	cytoplasm;nucleus;proteasome	catalytic activity	Pf00227		TRIAE_CS42_1BL_TGACv1_034400_AA0144400			1	0.962	-0.06	0.811403	0.985276	7.23	22.3947	101	99	2.84	16.04	3	3	102.1	105.4	108	103.4	77.3	103.9
High	Master Protein	A0A1D5YV28	Uncharacterized protein [OS=Triticum aestivum]	0	56.005	26	9	117	9	1	448	50.7	6.67	215	216	77.47	91.47	9	9	8	8	metabolic process	cytoplasm	catalytic activity;nucleotide binding;RNA binding	Pf01409, Pf03147		TRIAE_CS42_5AS_TGACv1_393890_AA1276830			0	1.148	0.2	0.290168	0.922441	26.42	24.3015	95.7	104.3	3.95	4.16	3	3	89.4	95.5	96.1	111.4	103.4	104.2
High	Master Protein	A0A1D5T5H1	Uncharacterized protein [OS=Triticum aestivum]	0	55.996	24	16	95	8	1	962	113	5.99	170	136	79.36	48.88	15	14	10	9	metabolic process		catalytic activity;protein binding	Pf00443, Pf12436, Pf13423, Pf14533		TRIAE_CS42_2AL_TGACv1_092888_AA0266140			7	0.794	-0.33	0.449715	0.952345	19.7	23.5608	116.1	83.9	9.78	4.96	3	3	122.8	101.9	119.4	86.3	80.6	88.9
High	Master Protein	A0A1D5YTX8	cysteine synthase [OS=Triticum aestivum]	0	55.983	43	11	119	3	1	428	45.3	8.27	477	318	111.42	88.77	10	9	10	10	metabolic process		catalytic activity	Pf00291		TRIAE_CS42_5AS_TGACv1_393239_AA1270220			0	0.82	-0.29	0.635418	0.980056	20.66	22.2601	116.6	83.4	13.74	12.24	3	3	116.4	100	131.9	73.9	83.3	94.4
High	Master Protein	W5BH99	GrpE protein homolog [OS=Triticum aestivum]	0	55.929	57	11	148	7	1	287	31.3	6.01	613	475	111.79	110.75	10	10	11	11	metabolic process;regulation of biological process	mitochondrion;organelle lumen	enzyme regulator activity;metal ion binding;nucleotide binding;protein binding	Pf01025		TRIAE_CS42_2BL_TGACv1_131453_AA0427930			0	1.078	0.11	0.533388	0.960041	16.5	25.7505	92.6	107.4	10.42	6.39	3	3	102.1	94.6	82.8	99	111.6	109.8
High	Master Protein	Q575T1	Acid beta-fructofuranosidase [OS=Triticum aestivum]	0	55.888	24	12	117	1	1	673	73.1	5.55	315	335	76.05	98.13	10	10	12	12	metabolic process	membrane	catalytic activity	Pf00251, Pf08244, Pf11837					1	1.043	0.06	0.4671	0.957414	22.05	21.4481	98.3	101.7	22.95	12.8	3	3	72.3	115.6	95.1	97.4	121.3	98.4
High	Master Protein	Q6W8Q2	1-Cys peroxiredoxin PER1 [OS=Triticum aestivum]	0	55.887	64	12	94	3	1	218	24	6.54	297	198	60.88	40.22	10	11	6	7	cellular homeostasis;metabolic process;regulation of biological process	nucleus	antioxidant activity;catalytic activity	Pf00578, Pf08534, Pf10417, Pf13905, Pf13911	543108	TRIAE_CS42_2BS_TGACv1_145997_AA0452270	PER1		8	0.607	-0.72	0.0122966	0.208603	12.98	25.8626	126.1	73.9	17.87	6.14	3	3	144.8	127	100.7	74.5	81	72
High	Master Protein	W5BER4	Uncharacterized protein [OS=Triticum aestivum]	0	55.866	26	13	105	2	1	666	74.1	6.06	179	196	74.64	66.08	12	12	10	10	metabolic process	cytoplasm	catalytic activity;nucleotide binding	Pf00587, Pf03129		TRIAE_CS42_2BL_TGACv1_131238_AA0424860			7	1.059	0.08	0.559879	0.962	36.57	23.2848	95.1	104.9	5.57	8.75	3	3	95.3	95	104.7	105.2	91.5	108.2
High	Master Protein	A0A1D6C8U9	Uncharacterized protein [OS=Triticum aestivum]	0	55.738	50	11	169	7	1	376	39.1	8.35	437	523	140.36	154.76	9	10	11	11				Pf13561		TRIAE_CS42_7BL_TGACv1_578432_AA1894780			5	0.941	-0.09	0.839264	0.986776	18.41	25.9922	100.4	99.6	6.85	4.03	3	3	96.9	100.4	110.4	99.6	99.7	92.9
High	Master Protein	A0A1D5XI66	Uncharacterized protein [OS=Triticum aestivum]	0	55.735	29	13	100	13	1	742	81.3	8.78	200	183	76.86	68.63	12	12	11	10	metabolic process		catalytic activity	Pf00206, Pf14698		TRIAE_CS42_4BL_TGACv1_320740_AA1047610			0	0.885	-0.18	0.731725	0.983028	18.87	25.0132	106.8	93.2	7.08	4.25	3	3	98.9	107.1	114	97.2	89.2	93.6
High	Master Protein	A0A1D6CJV4	Uncharacterized protein [OS=Triticum aestivum]	0	55.732	45	9	137	9	1	242	25.8	5.91	499	576	117.14	121.59	9	9	9	9	metabolic process		metal ion binding	Pf01789		TRIAE_CS42_7BS_TGACv1_593971_AA1955420			0	1.162	0.22	0.301031	0.922441	39.16	25.1719	95.4	104.6	14.39	10.79	3	3	93.6	104.5	78.1	99.8	121.3	102.7
High	Master Protein	W4ZTR7	Proteasome subunit beta type [OS=Triticum aestivum]	0	55.712	61	10	121	1	1	244	26.1	5.58	597	480	89.55	72.04	9	10	9	10	metabolic process	cytoplasm;nucleus;proteasome	catalytic activity	Pf00227		TRIAE_CS42_1AL_TGACv1_002174_AA0039460			0	0.947	-0.08	0.819171	0.985276	14.69	20.9605	102.7	97.3	16.89	2.59	3	3	100	90	124.4	94.7	93	97.9
[truncated: 4,469 more rows]
[truncated: 42 more columns]
