# Supplementary material for: Proteomic, Biochemical, and Morphological Analyses of the Effect of Silver Nanoparticles Mixed with Organic and Inorganic Chemicals on Wheat Growth
Source: Cells. 2022 May 7;11(9):1579. doi: 10.3390/cells11091579 (PMC9104970; doi:10.3390/cells11091579)
Supplement: Supplementary file 1 [file cells-11-01579-s001.zip › rev2 Suplemental Table S3.pdf]

Table S3. List of significantly changed proteins in wheat roots treated with AgNPs, nicotinate, and KNO<sub>3</sub> compared to untreated plant.

| Log2<br>(Fold<br>Change) | Accession  | Description                              | MW<br>(kDa) | pI    | LOG<br>PValue | MapMan<br>function      |
|--------------------------|------------|------------------------------------------|-------------|-------|---------------|-------------------------|
| 4.1531                   | A0A1D6S6K6 | RNA-binding domain-containing protein    | 21.6        | 9.33  | 1.3046        | not assigned            |
| 2.5429                   | Q9SQ58     | Starch synthase                          | 66          | 6.83  | 1.6040        | major CHO metabolism    |
| 2.4902                   | W5ANZ2     | Nucleosome/chromatin assembly factor     | 13          | 8.25  | 1.5989        | RNA                     |
| 1.9766                   | W5FKR1     | MOSC domain-containing protein 2         | 35.6        | 5.47  | 1.3216        | not assigned            |
| 1.9709                   | A0A077RYT2 | G-proteins                               | 23.2        | 5.31  | 2.0418        | signalling.             |
| 1.8830                   | W5GSR7     | Glutamyl-tRNA(Gln) amidotransferase      | 60.6        | 6.42  | 3.1489        | tetrapyrrole synthesis. |
| 1.5827                   | A0A1D5ZQH0 | UPI0003D5684F                            | 10.8        | 10.08 | 2.1853        | N/A                     |
| 1.4154                   | A0A1D5SDG4 | Predicted protein                        | 47.4        | 6.37  | 1.3921        | protein.targeting.      |
| 1.2905                   | A0A096UW30 | Uncharacterized protein C16G5.07c        | 40.1        | 7.49  | 1.4294        | not assigned            |
| 1.2218                   | A0A1D6AR09 | Predicted protein                        | 27.7        | 8.6   | 1.4527        | not assigned            |
| 1.1719                   | A0A1D6AQK5 | Uncharacterized protein                  | 16.6        | 7.18  | 1.7471        | not assigned            |
| 1.1602                   | A0A1D6CLF4 | Predicted protein                        | 30.5        | 9.52  | 2.2144        | protein.assembly        |
| 1.1576                   | A0A1D5VED9 | Uncharacterized protein                  | 63.1        | 5.36  | 1.6057        | not assigned.           |
| 1.1289                   | A0A1D5UQ46 | Uncharacterized protein                  | 43.6        | 7.78  | 1.7705        | not assigned.           |
| 1.1013                   | A0A1D5U2X7 | Glutathione peroxidase                   | 19.3        | 7.84  | 1.9192        | redox.                  |
| 1.0624                   | A0A1D5RWJ9 | Predicted protein                        | 47.3        | 6.58  | 1.7070        | protein.targeting       |
| 1.0446                   | A0A1D5T3J1 | pyruvate dehydrogenase E3                | 52.9        | 7.96  | 1.4967        | TCA                     |
| 1.0112                   | W5A446     | proline rich family                      | 23.3        | 4.55  | 3.4421        | not assigned.           |
| 0.9045                   | A0A1D5SPQ1 | proline rich family                      | 23.2        | 4.49  | 1.7132        | not assigned.           |
| 0.8908                   | A0A1D6B3R4 | homoserine kinase                        | 37.9        | 8.57  | 1.8444        | amino acid metabolism   |
| 0.8560                   | A0A1D5X2D4 | Ferredoxins and Rieske domain            | 29.9        | 5.67  | 2.5173        | misc.                   |
| 0.8507                   | A0A1D5YL67 | glyceraldehyde-3-phosphate dehydrogenase | 46.9        | 6.47  | 2.1841        | glycolysis              |
| 0.8351                   | A0A1D5XGM1 | catalase                                 | 56.8        | 7.02  | 1.5226        | redox                   |
| 0.8231                   | A0A1D5UZ55 | Uncharacterized protein                  | 27.2        | 8.97  | 2.9630        | not assigned            |
| 0.7474                   | A0A1D5YIN9 | polypeptide subunits                     | 35          | 9.94  | 2.1478        | glycolysis              |
| -0.6253                  | W5FL28     | Lipoxygenase                             | 105.4       | 6.11  | 2.3587        | hormone metabolism      |
| -0.6621                  | C6K7G3     | Lipoxygenase                             | 96.5        | 6.65  | 3.2198        | hormone metabolism      |
| -0.6982                  | A0A0C4BJG7 | Glutamine synthetase                     | 38.7        | 5.72  | 1.7444        | N-metabolism            |
| -0.7649                  | A0A1D5WPA9 | aspartate protease                       | 44.5        | 8.1   | 1.5657        | protein.degradation.    |
| -0.7843                  | A0A1D5THX4 | glycosyl hydrolase family 5              | 64.7        | 6.32  | 2.2351        | misc.                   |

|         |            |                                      |       |      |        |                        |
|---------|------------|--------------------------------------|-------|------|--------|------------------------|
| -0.8113 | A0A1D6RGV7 | glutathione S transferases           | 24.9  | 5.81 | 1.8697 | redox                  |
| -0.8148 | A0A1D5WAN2 | Orphan family                        | 92.1  | 5.47 | 1.6018 | RNA                    |
| -0.8399 | Q6RUJ2     | Glutamine synthetase                 | 38.7  | 5.58 | 4.1135 | N-metabolism           |
| -0.9085 | A0A1D5VLU6 | Uncharacterized protein              | 41.3  | 5.38 | 2.4205 | not assigned           |
| -0.9164 | B2ZGL3     | Plastid acetyl-CoA carboxylase       | 254.9 | 6.13 | 2.7962 | lipid metabolism       |
| -0.9202 | A0A1D6DH60 | glycosyltransferase                  | 53.2  | 6.21 | 2.3466 | misc.                  |
| -0.9207 | A0A1D5U520 | glycolate oxydase                    | 47.8  | 9.04 | 2.1154 | glycolysis             |
| -0.9619 | D5MTE2     | glycosyltransferase                  | 49.7  | 5.8  | 1.6936 | misc.                  |
| -1.0086 | A0A077RS68 | late embryogenesis abundant          | 42.5  | 5.22 | 1.7809 | development.           |
| -1.0156 | A0A1D6DIS2 | late embryogenesis abundant          | 45.6  | 8.66 | 2.7720 | not assigned           |
| -1.0174 | W5FUL1     | asparagine synthetase                | 71.9  | 7.12 | 3.3894 | amino acid metabolism  |
| -1.0220 | A0A1D6CAY4 | Uncharacterized protein              | 39.5  | 8.1  | 2.2531 | not assigned           |
| -1.0587 | A0A1D5SSN1 | Uncharacterized protein              | 52.2  | 7.12 | 2.8195 | secondary metabolism   |
| -1.0680 | A0A1D5UE08 | PDC                                  | 64.9  | 6.32 | 1.8328 | fermentation.          |
| -1.0998 | W5GZ16     | aspartate family.lysine              | 115.5 | 5.87 | 3.5646 | amino acid metabolism. |
| -1.1062 | A0A1D5XSR2 | Xyloglucan endotransglucosylase      | 33.5  | 7.01 | 1.9681 | cell wall              |
| -1.1518 | A0A1D6CKD4 | Uncharacterized protein              | 24.6  | 4.79 | 2.0428 | stress.biotic          |
| -1.1590 | A0A077RVE4 | Uncharacterized protein              | 28.9  | 4.84 | 2.3276 | not assigned           |
| -1.2332 | A0A1D6BH63 | Uncharacterized protein              | 29.9  | 5.02 | 2.8373 | stress.abiotic.        |
| -1.2399 | W5H7W2     | Dihydroflavonol-4-reductase          | 35.1  | 6.43 | 2.9502 | secondary metabolism   |
| -1.2553 | Q41542     | xyloglucan endotransglucosylase      | 33.4  | 7.01 | 1.9645 | cell wall.             |
| -1.2968 | P30569     | EC protein I/II                      | 7.7   | 7.59 | 1.9529 | metal handling.        |
| -1.3025 | A0A1D6BE91 | glutathione S transferases           | 24.8  | 5.77 | 2.3181 | redox                  |
| -1.3693 | A0A1D5SZ44 | late embryogenesis abundant          | 22    | 8.91 | 2.3281 | development.           |
| -1.3708 | A0A1D6ACN8 | allene oxidase cyclase               | 25.7  | 8.62 | 3.0017 | hormone metabolism.    |
| -1.4606 | A0A1D5WFR9 | peroxidase                           | 38.2  | 7.08 | 2.2699 | redox                  |
| -1.4866 | A0A1D6BLA1 | Uncharacterized protein              | 39.6  | 8.27 | 2.3366 | not assigned           |
| -1.5192 | A0A1D5U5D9 | amine oxidase                        | 85.7  | 7.08 | 3.8945 | misc.                  |
| -1.5442 | A0A1D6ARD7 | Uncharacterized protein              | 14.6  | 8.72 | 2.8543 | N/A                    |
| -1.5471 | W5GY26     | 12-Oxo-PDA-reductase                 | 40.6  | 6.62 | 2.7611 | hormone metabolism.    |
| -1.5816 | A0A1D6BXX6 | glutathione S transferases           | 26.6  | 5.5  | 3.0221 | redox                  |
| -1.6378 | A0A1D6CVN2 | Polyadenylate-binding protein        | 70.9  | 6.95 | 2.5851 | RNA                    |
| -1.6883 | A0A1D5ZF40 | MADS box transcription factor family | 70.4  | 7.01 | 3.3134 | RNA                    |
| -1.6909 | A0A1D6BB05 | Transmembrane 9 superfamily member   | 72.2  | 7.42 | 3.0705 | not assigned           |
| -1.6918 | A0A1D6C4X1 | carbonic anhydrases                  | 32.1  | 6.25 | 3.8194 | TCA                    |

|         |            |                                  |       |      |        |                       |
|---------|------------|----------------------------------|-------|------|--------|-----------------------|
| -1.7481 | A0A1D6AEQ8 | Predicted protein                | 47.2  | 5.94 | 2.5495 | stress.abiotic.       |
| -1.8656 | A0A1D5XRM8 | Uncharacterized protein          | 15.7  | 9.57 | 3.9836 | not assigned.         |
| -1.9147 | W5FCA4     | Actin depolymerization facto     | 15.8  | 4.82 | 2.3572 | cell.organisation     |
| -1.9154 | A0A1D6BII6 | Uncharacterized protein          | 81.2  | 7.43 | 3.3765 | not assigned.         |
| -1.9377 | A0A0H4MAT1 | Dehydrin                         | 13.9  | 8.87 | 2.2928 | stress.abiotic.       |
| -1.9690 | A0A1D5T629 | Predicted protein                | 47.8  | 7.02 | 2.2288 | not assigned.unknown  |
| -1.9843 | A0A1D5TK55 | G-proteins                       | 178.5 | 5.81 | 2.5288 | signalling.           |
| -2.0122 | A0A1D6A238 | Uncharacterized protein          | 65.5  | 5.26 | 2.0622 | cell.organisation     |
| -2.0275 | A0A1D5V489 | Casein kinase I-like             | 52.9  | 9.74 | 2.5788 | protein.PTM           |
| -2.0403 | A0A1D5WKE9 | pyrimidine.UMP Synthase          | 51.1  | 6.54 | 1.8803 | nucleotide            |
| -2.0784 | A0A1D6RTG2 | Uncharacterized protein          | 11.8  | 8.41 | 2.5648 | N/A                   |
| -2.0821 | A0A0F7G9F3 | WSI18 protein                    | 22.7  | 7.18 | 1.8418 | development.          |
| -2.4136 | A0A1D5X5E7 | Thaumatococcus-like protein TLP8 | 23.4  | 7.27 | 2.4462 | stress.biotic         |
| -2.4753 | A0A023W4F1 | Endochitinase                    | 33.4  | 7.17 | 2.4137 | stress.biotic         |
| -2.4962 | A0A1D5UH99 | Uncharacterized protein          | 29    | 8.5  | 1.9768 | stress.abiotic        |
| -2.6644 | A0A1D5WVH9 | late embryogenesis abundant      | 43.2  | 5.53 | 1.7742 | development.          |
| -2.7042 | A0A077RSI2 | Uncharacterized protein          | 7.5   | 7.74 | 1.9215 | not assigned          |
| -2.7322 | A0A1D5TMQ4 | hydroxypyruvate reductase        | 35.3  | 6.62 | 2.0284 | glycolysis            |
| -2.9407 | A0A023W594 | Endochitinase                    | 33.5  | 7.43 | 2.0550 | stress.biotic         |
| -3.1925 | A0A1D6CMV8 | Uncharacterized protein          | 39.6  | 8.27 | 4.2445 | not assigned          |
| -3.2818 | Q4JH28     | glucan endo-1,3-beta-glucosidase | 35.3  | 8.48 | 3.0818 | misc.                 |
| -3.5183 | A0A1D5X1Y2 | Thaumatococcus-like protein      | 21.7  | 8.15 | 1.9979 | stress.biotic         |
| -3.8302 | A0A1D5UMP3 | Chitinase IV                     | 28.6  | 4.77 | 1.7457 | stress.biotic         |
| -3.9589 | O64393     | Wheatwin-2                       | 15.9  | 7.94 | 2.5250 | stress.abiotic        |
| -4.0004 | A0A1D5XWK3 | asparagine synthetase            | 66.1  | 6.49 | 2.4808 | amino acid metabolism |

PTM, post translational modification
